# Supplementary material for: Ait1 regulates TORC1 signaling and localization in budding yeast
Source: eLife journal article supplement (doi:10.7554/elife.68773), 2022-09-01
Supplement: supp [file elife_poa_e68773_Figure_8_figure_supplement_2.pdf › elife_poa_e68773_Figure_8_figure_supplement_2.pdf]

|                    | 210          | 220         | 230       | 240      | 250      | 260        | 270        | 280        | 290         | 300                                 |                          |
|--------------------|--------------|-------------|-----------|----------|----------|------------|------------|------------|-------------|-------------------------------------|--------------------------|
| Phy0000DAF_ASHGO   | PD-A-----    | QS-EELSSLRS | ISLSRCMNV | RQASRIS  | SDNIYQ   | PPP-----   | RASHSY     | GS         | LA-----     | PAR-----                            |                          |
| Phy00044AQ_CANGA   | ID-V-----    | LN-RKNSLN   | RENTLS    | SKCIG    | VERKS    | SSTISNNVYT | NDADEE     | ---VST     | SKYG-TL     | TYMDYTSWDKFRKSN-FNSDEYG             |                          |
| Phy0008MW5_KLULA   | AT-S-----    | AN-SDSE     | IRKEI     | ELDKCVS  | VRMLRS   | KISKNVYNS  | GYGATNV    | GT         | TLNNGSVNQ   | -----DSN-----                       |                          |
| Phy000CW5E_YEAST   | QES-ANTYC--  | NDMSHNDD    | GCSTEYR   | PNVVD    | RSDITL   | SKCIEVRND  | SSSISNNVYS | SEYHPIK    | PLRSS       | SSTYG-SIRQ-----QP---H               |                          |
| Phy000JP94_VANPO   | TNE-DNLNN--- | LLNN---     | TFERKS    | SILSAR   | GNITLS   | QCVKVETN   | SSTLSNNVYS | CSYE---    | NSKPKY      | GSTDV-----KVLQNHD-S                 |                          |
| Phy000JQ9E_KLUWA   | NQ-M-----    | MQ-EEQD     | LIENNITL  | SKCIDV   | KQRASH   | ISQNVYSS   | ENNNNG     | SRAVDS     | --N-GAP     | S-----PEG-----                      |                          |
| Phy000NMEN_SACBA   | QDS-ANWYS--  | NSISYK      | DDRVC     | GTENHHN  | FVKRSD   | ITLSKCI    | GVEND      | SSSISNNVYS | SDYHPIK     | PLHSTSSAYG-SIHQ-----QSHENNI         |                          |
| Phy000NSBF_SACCA   | HN-NNNINT    | SSNNNNNN    | ---       | IHHRPHHL | PNRKNITL | SKCVDIR    | KQASNIS    | NNVYSS     | SHG---EEHH  | QANGYG-SINA-----ESS---N             |                          |
| Phy0023Z7C_SACKL   | QQ-Q-----    | KQ-EEDD     | TIRTNISL  | SKCMD    | VRN      | SSNIS      | ENVYYH     | VEQI       | PLLTQQT     | SREIKYGS-----DNE-----               |                          |
| Phy002409J_LACTH   | SK-M-----    | MQ-DEQD     | LARSNITL  | SKCIDV   | RRRTSH   | ISENVYCH   | ENSQPPQ    | CAQS---    | P-NSAA      | -----AEG-----                       |                          |
| Phy00245AX_ZYGRO   | LLD-RN-----  | SG-----     | SSTN      | EDDITL   | SKCLD    | VERDSSSIS  | NNVYSE     | IDAQ---    | NNQKGY      | G-TMSD-----DG-----                  |                          |
| Phy003LW07_51914   | -----        | HQPHL       | QRTPSD    | VNLSWL   | VSHIR    | NNDPIA     | QNVYYQ     | GNE        | SVINGLASQ   | -----V-----QTYDS-----               |                          |
| Phy003M2LW_51660   | I-----       | -----       | IHNLS     | INN      | CITL     | RKNYNN     | ISNNVYD    | QSDSTT     | ---QDNH     | NAYGT-----                          |                          |
| Phy004F36L_588726  | PVS-TSQSN--- | GVK---      | INGT      | DDAHL    | RKDITL   | SR         | CVKMFHL    | SSSIS      | NNVYSS      | ELKPLNSN-PS                         | PQTYK-T-----             |
| Phy004F6LU_1071379 | VN-T-----    | FS-DEY      | QSLRKKIS  | LSNCT    | KLRLS    | SSSIS      | NNIYKN     | STL-TSNL   | NSPPSSA     | GT                                  | KTNNHNSNNNNNNNSNN-MVNTSG |
| Phy004FDOZ_TETPH   | IL-D-----    | NADD-----   | NYAIK     | NTRLPS   | SKS      | DEISL      | QCLK       | VEYS       | SSTLSNNVYS  | SLSKTVNPSYGS-----T-----NNNVK-NHDDPT |                          |
| Phy004FGEP_KAZAF   | INN-TNHS     | P-----      | SIN       | QNITL    | SKCV     | GVRV       | SSSIS      | NNVYSS     | DLT-----KYH | SKYG-SIDD-----                      |                          |
| Phy004FJBO_NAUDC   | QIHSDN-----  | IGS-----    | PILDR     | KKISLS   | MCVD     | VRQSS      | SKIS       | DNVYCS     | KS-----NH   | GYG-SSST-----S-----                 |                          |
| Phy004FYLI_TORDC   | -----        | DSDV        | EDNITL    | LA       | CVG      | LSIS       | SSTIS      | QNVY       | CAD-----YG  | SIRK-----PV-----                    |                          |

● ● ● ● ● ●
