# Supplementary material for: Ait1 regulates TORC1 signaling and localization in budding yeast
Source: eLife. 2022 Sep 1;11:e68773. doi: 10.7554/eLife.68773 (PMC9499541; doi:10.7554/eLife.68773)
Supplement: Supplementary file 1. — The IP-mock tab shows the number of background corrected peptide spectral counts (PSMs) for each protein detected (rows) across the different IPs (columns). The Filterpass tab shows the number of raw PSMs in each IP and mock IP. Proteins with at least twofold higher abundance in the true IP (Kog1-FLAG or GFP-Pib2) versus the mock IP (Kog1-HA or wild-type Pib2), and with at least seven peptide spectral maps in the true IP, were scored as potential interactors. [file elife-68773-supp1.xlsx]

## Sheet: IP-mock
			Kog1-N (20 min)	Kog1-heat (20 min)	Kog1-KCl (20 min)	Kog1-H2O2 (20 min)	Pib2-Glu (0 min)	Pib2-Glu (2 hrs)	Kog1-Glu_A (0 min)	Kog1-Glu_A (20 min)	Kog1-Glu_A (2 hrs)	Kog1-Glu_B (0 min)	Kog1-Glu_B (2 hrs)	Kog1-Glu_B (6 hrs)	Kog1-Glu_B (24 hrs)	Frequency
	TOR1	TOR1 SGDID:S000003827, Chr X from 559416-566828, Genome Release 64-2-1, Verified ORF, "PIK-related protein kinase and rapamycin target; subunit of TORC1, a complex that controls growth in response to nutrients by regulating translation, transcription, ribosome biogenesis, nutrient transport and autophagy; involved in meiosis; TOR1 has a paralog, TOR2, that arose from the whole genome duplication"	524	683	538	576	235	273	415	378	383	339	325	266	230	13
	KOG1	KOG1 SGDID:S000001229, Chr VIII from 480672-475999, Genome Release 64-2-1, reverse complement, Verified ORF, "Subunit of TORC1; TORC1 is a rapamycin-sensitive complex involved in growth control that contains Tor1p or Tor2p, Lst8p and Tco89p; contains four HEAT repeats and seven WD-40 repeats; may act as a scaffold protein to couple TOR and its effectors"	376	447	432	407	145	170	291	272	274	219	240	177	217	13
	TCO89	TCO89 SGDID:S000006101, Chr XVI from 205248-207647, Genome Release 64-2-1, Verified ORF, "Subunit of TORC1 (Tor1p or Tor2p-Kog1p-Lst8p-Tco89p); regulates global H3K56ac; TORC1 complex regulates growth in response to nutrient availability; cooperates with Ssd1p in the maintenance of cellular integrity; deletion strains are hypersensitive to rapamycin"	124	147	137	161	105	91	153	169	147	124	97	100	99	13
	RTG2	RTG2 SGDID:S000003221, Chr VII from 27484-25718, Genome Release 64-2-1, reverse complement, Verified ORF, "Sensor of mitochondrial dysfunction; regulates the subcellular location of Rtg1p and Rtg3p, transcriptional activators of the retrograde (RTG) and TOR pathways; Rtg2p is inhibited by the phosphorylated form of Mks1p"	75	45	56	42	13	10	42	41	42	36	37	33	19	13
	KSP1	KSP1 SGDID:S000001124, Chr VIII from 271548-268459, Genome Release 64-2-1, reverse complement, Verified ORF, "Serine/threonine protein kinase; associates with TORC1 and likely involved in TOR signaling cascades; negative regulator of autophagy; nuclear translocation required for haploid filamentous growth; regulates filamentous growth induced nuclear translocation of Bcy1p, Fus3p, and Sks1p; over…	63	41	85	93	50	45	91	86	82	62	52	46	27	13
	LST8	LST8 SGDID:S000004951, Chr XIV from 620067-620978, Genome Release 64-2-1, Verified ORF, "Protein required for the transport of Gap1p; required for the transport of amino acid permease Gap1p from the Golgi to the cell surface; component of the TOR signaling pathway; associates with both Tor1p and Tor2p; contains a WD-repeat"	52	86	72	84	24	19	40	57	49	44	34	30	20	13
	IML1	IML1 SGDID:S000003899, Chr X from 684567-689321, Genome Release 64-2-1, Verified ORF, "GTPase-activating protein (GAP), subunit of SEA and Iml1p complexes; SEA (Seh1-associated) complex is a coatomer-related complex that associates dynamically with the vacuole; Iml1p complex (Iml1p-Npr2p-Npr3p) is required for non-nitrogen-starvation (NNS)-induced autophagy; localized to either pre-autophagosomal…	42	26	54	38	12	-	27	11	15	31	47	17	8	12
	MKS1	MKS1 SGDID:S000005020, Chr XIV from 483556-485310, Genome Release 64-2-1, Verified ORF, "Pleiotropic negative transcriptional regulator; involved in Ras-CAMP and lysine biosynthetic pathways and nitrogen regulation; involved in retrograde (RTG) mitochondria-to-nucleus signaling"	43	47	47	40	10	-	30	28	36	36	26	28	10	12
	YGR125W	YGR125W SGDID:S000003357, Chr VII from 742325-745435, Genome Release 64-2-1, Uncharacterized ORF, "Putative protein of unknown function; deletion mutant has decreased rapamycin resistance but normal wormannin resistance; green fluorescent protein (GFP)-fusion protein localizes to the vacuole"	19	17	24	26	16	21	20	-	14	19	31	17	16	12
	VAC7	VAC7 SGDID:S000004999, Chr XIV from 526086-529583, Genome Release 64-2-1, Verified ORF, "Integral vacuolar membrane protein; involved in vacuole inheritance and morphology; activates Fab1p kinase activity under basal conditions and also after hyperosmotic shock"	20	16	22	15	14	9	15	15	13	19	22	11	-	12
	YDL180W	YDL180W SGDID:S000002339, Chr IV from 135896-137539, Genome Release 64-2-1, Uncharacterized ORF, "Putative protein of unknown function; green fluorescent protein (GFP)-fusion protein localizes to the vacuole"	15	19	17	17	20	16	13	18	13	14	14	-	6	12
	TOR2	TOR2 SGDID:S000001686, Chr XI from 63359-55935, Genome Release 64-2-1, reverse complement, Verified ORF, "PIK-related protein kinase and rapamycin target; subunit of TORC1, a complex that regulates growth in response to nutrients and TORC2, a complex that regulates cell-cycle dependent polarization of the actin cytoskeleton; involved in meiosis; TOR2 has a paralog, TOR1, that arose from the whole…	170	194	179	177	-	-	127	85	87	123	136	61	39	11
	YDR089W	YDR089W SGDID:S000002496, Chr IV from 622112-624721, Genome Release 64-2-1, Verified ORF, "Protein of unknown function; deletion confers resistance to nickel; contains an SPX domain, which is found in proteins involved in phosphate homeostasis; relocalizes from vacuole to cytoplasm upon DNA replication stress"	26	17	23	24	-	12	19	16	-	25	34	16	11	11
	GTR1	GTR1 SGDID:S000004590, Chr XIII from 26930-27862, Genome Release 64-2-1, Verified ORF, "Cytoplasmic GTPase; forms a heterodimer with Gtr2p to stimulate TORC1 in response to amino acids; component of GSE complex, which is required for sorting of Gap1p; involved in phosphate transport and telomeric silencing; similar to human RagA and RagB"	25	19	21	26	10	-	9	6	7	23	23	9	-	11
	YVC1	YVC1 SGDID:S000005613, Chr XV from 487707-489734, Genome Release 64-2-1, Verified ORF, "Vacuolar cation channel; mediates release of Ca(2+) from the vacuole in response to hyperosmotic shock"	19	11	15	18	11	10	16	10	-	10	15	8	-	11
	SKY1	SKY1 SGDID:S000004829, Chr XIII from 701039-698811, Genome Release 64-2-1, reverse complement, Verified ORF, "SR protein kinase (SRPK); involved in regulating proteins involved in mRNA metabolism and cation homeostasis; similar to human SRPK1"	12	-	17	14	7	-	12	13	9	13	10	7	6	11
	VPS34	VPS34 SGDID:S000004230, Chr XII from 617533-620160, Genome Release 64-2-1, Verified ORF, "Phosphatidylinositol (PI) 3-kinase that synthesizes PI-3-phosphate; forms membrane-associated signal transduction complex with Vps15p to regulate protein sorting; activated by the GTP-bound form of Gpa1p; a fraction is localized, with Vps15p, to nuclear pores at nucleus-vacuole junctions and may facilitate t…	11	11	-	13	9	7	7	7	10	13	16	7	-	11
	GTR2	GTR2 SGDID:S000003395, Chr VII from 827552-828577, Genome Release 64-2-1, Verified ORF, "Putative GTP binding protein; negatively regulates Ran/Tc4 GTPase cycle; activates transcription; subunit of EGO and GSE complexes; required for sorting of Gap1p; localizes to cytoplasm and to chromatin; homolog of human RagC and RagD"	12	7	10	12	7	-	7	6	6	14	10	10	-	11
	PIB2	PIB2 SGDID:S000002991, Chr VII from 452104-450197, Genome Release 64-2-1, reverse complement, Verified ORF, "Protein of unknown function; contains FYVE domain; similar to Fab1 and Vps27"	10	23	27	31	156	157	28	30	14	13	16	-	-	11
	NPR3	NPR3 SGDID:S000001015, Chr VIII from 62563-59123, Genome Release 64-2-1, reverse complement, Verified ORF, "Subunit of SEA (Seh1-associated), Npr2/3, and Iml1p complexes; Npr2/3 complex mediates downregulation of TORC1 activity upon amino acid limitation; SEA complex is a coatomer-related complex that associates dynamically with the vacuole; Iml1p complex (Iml1p-Npr2p-Npr3p) is required for non-n…	23	13	20	16	6	-	11	-	6	18	29	8	-	10
	MTC5	MTC5 SGDID:S000002535, Chr IV from 709549-712995, Genome Release 64-2-1, Verified ORF, "Subunit of the SEA (Seh1-associated) complex; SEA is a coatomer-related complex that associates dynamically with the vacuole; has N-terminal WD-40 repeats and a C-terminal RING motif; mtc5 is synthetically sick with cdc13-1; relative distribution to vacuolar membrane punctae decreases upon DNA replication stre…	20	15	27	26	8	-	10	-	7	16	22	7	-	10
	AVT4	AVT4 SGDID:S000005045, Chr XIV from 434999-437140, Genome Release 64-2-1, Verified ORF, "Vacuolar transporter; exports large neutral amino acids from the vacuole; member of a family of seven S. cerevisiae genes (AVT1-7) related to vesicular GABA-glycine transporters"	12	12	12	19	8	9	15	18	7	-	-	6	-	10
	MNR2	MNR2 SGDID:S000001547, Chr XI from 317764-320673, Genome Release 64-2-1, Verified ORF, "Vacuolar membrane protein required for magnesium homeostasis; putative magnesium transporter; has similarity to Alr1p and Alr2p, which mediate influx of Mg2+ and other divalent cations"	-	-	18	18	10	9	-	10	8	17	14	16	8	10
	SEA4	SEA4 SGDID:S000000200, Chr II from 21293-18177, Genome Release 64-2-1, reverse complement, Verified ORF, "Subunit of the SEA (Seh1-associated) complex; SEA is a coatomer-related complex that associates dynamically with the vacuole; has an N-terminal beta-propeller fold and a C-terminal RING motif; promoter contains multiple GCN4 binding sites"	24	23	36	24	16	-	-	12	14	19	-	18	-	9
	SYG1	SYG1 SGDID:S000001309, Chr IX from 267823-265115, Genome Release 64-2-1, reverse complement, Verified ORF, "Plasma membrane protein of unknown function; truncation and overexpression suppresses lethality of G-alpha protein deficiency"	30	-	24	28	-	12	13	16	-	13	24	12	-	9
	SAP185	SAP185 SGDID:S000003634, Chr X from 242082-245258, Genome Release 64-2-1, Verified ORF, "Protein that forms a complex with the Sit4p protein phosphatase; required for Sit4p function; member of a family of similar proteins including Sap4p, Sap155p, and Sap190p; SAP185 has a paralog, SAP190, that arose from the whole genome duplication"	15	-	20	17	8	-	19	-	13	21	21	12	-	9
	RMD8	RMD8 SGDID:S000001944, Chr VI from 246146-248134, Genome Release 64-2-1, Verified ORF, "Cytosolic protein required for sporulation"	11	10	-	18	11	8	-	-	11	18	14	8	-	9
	YLR001C	YLR001C SGDID:S000003991, Chr XII from 153977-151389, Genome Release 64-2-1, reverse complement, Uncharacterized ORF, "Putative protein of unknown function; the authentic, non-tagged protein is detected in highly purified mitochondria in high-throughput studies; predicted to be palmitoylated"	10	11	17	16	-	8	9	-	9	6	16	-	-	9
	RMD1	RMD1 SGDID:S000002159, Chr IV from 447984-449276, Genome Release 64-2-1, Verified ORF, "Cytoplasmic protein required for sporulation"	-	12	13	14	8	-	-	11	9	15	9	10	-	9
	YPK9	YPK9 SGDID:S000005817, Chr XV from 861175-865593, Genome Release 64-2-1, Verified ORF, "Vacuolar protein with a possible role in sequestering heavy metals; has similarity to the type V P-type ATPase Spf1p; homolog of human ATP13A2 (PARK9), mutations in which are associated with Parkinson disease and Kufor-Rakeb syndrome"	20	-	-	27	17	17	-	-	16	25	23	9	-	8
	VPS15	VPS15 SGDID:S000000301, Chr II from 436951-441315, Genome Release 64-2-1, Verified ORF, "Serine/threonine protein kinase involved in vacuolar protein sorting; functions as a membrane-associated complex with Vps34p; active form recruits Vps34p to the Golgi membrane; interacts with the GDP-bound form of Gpa1p; myristoylated; a fraction is localized, with Vps34p, to nuclear pores at nucleus-vacuole …	27	-	22	21	-	9	10	-	-	19	22	6	-	8
	NPR2	NPR2 SGDID:S000000788, Chr V from 34407-36254, Genome Release 64-2-1, Verified ORF, "Subunit of SEA (Seh1-associated), Npr2/3, and Iml1p complexes; Npr2/3 complex mediates downregulation of TORC1 activity upon amino acid limitation; SEA complex is a coatomer-related complex that associates dynamically with the vacuole; Iml1p complex is required for non-nitrogen-starvation (NNS)-induced autophagy;…	15	8	27	22	8	-	6	-	-	7	12	-	-	8
	GLN3	GLN3 SGDID:S000000842, Chr V from 229795-231987, Genome Release 64-2-1, Verified ORF, "Transcriptional activator of genes regulated by nitrogen catabolite repression; localization and activity regulated by quality of nitrogen source and Ure2p"	11	15	13	15	-	-	14	18	8	-	7	-	-	8
	FRK1	FRK1 SGDID:S000006062, Chr XVI from 286061-283464, Genome Release 64-2-1, reverse complement, Verified ORF, "Protein kinase of unknown cellular role; green fluorescent protein (GFP)-fusion protein localizes to the cytoplasm; interacts with rRNA transcription and ribosome biogenesis factors and the long chain fatty acyl-CoA synthetase Faa3p; FRK1 has a paralog, KIN4, that arose from the whole geno…	7	-	13	18	-	-	6	-	10	18	12	15	-	8
	YCK3	YCK3 SGDID:S000000925, Chr V from 404813-406387, Genome Release 64-2-1, Verified ORF, "Palmitoylated vacuolar membrane-localized casein kinase I isoform; negatively regulates vacuole fusion during hypertonic stress via phosphorylation of Vps41p; shares essential functions with Hrr25p; regulates vesicle fusion in AP-3 pathway"	-	17	-	26	-	11	-	22	-	22	34	21	10	8
	VNX1	VNX1 SGDID:S000005265, Chr XIV from 34696-37422, Genome Release 64-2-1, Verified ORF, "Calcium/H+ antiporter localized to the endoplasmic reticulum membrane; member of the calcium exchanger (CAX) family; potential Cdc28p substrate"	-	10	-	16	15	14	17	-	11	-	14	8	-	8
	RTG3	RTG3 SGDID:S000000199, Chr II from 23536-22076, Genome Release 64-2-1, reverse complement, Verified ORF, "bHLH/Zip transcription factor for retrograde (RTG) and TOR pathways; forms a complex with another bHLH/Zip protein, Rtg1p, to activate the pathways; target of Hog1p"	30	15	21	18	-	-	-	-	-	15	9	8	-	7
	PEP5	PEP5 SGDID:S000004844, Chr XIII from 733545-736634, Genome Release 64-2-1, Verified ORF, "Histone E3 ligase, component of CORVET membrane tethering complex; peripheral vacuolar membrane protein required for protein trafficking and vacuole biogenesis; interacts with Pep7p; involved in ubiquitylation and degradation of excess histones"	17	-	-	14	-	7	-	-	-	19	20	14	10	7
	BUD3	BUD3 SGDID:S000000520, Chr III from 96281-101191, Genome Release 64-2-1, Verified ORF, "Protein involved in bud-site selection; required for axial budding pattern; localizes with septins to bud neck in mitosis and may constitute an axial landmark for next round of budding"	16	-	14	12	-	-	-	-	14	23	16	-	9	7
	LSB6	LSB6 SGDID:S000003636, Chr X from 237263-239086, Genome Release 64-2-1, Verified ORF, "Type II phosphatidylinositol 4-kinase; binds Las17p, a homolog of human Wiskott-Aldrich Syndrome protein involved in actin patch assembly and actin polymerization"	16	9	11	18	13	12	11	-	-	-	-	-	-	7
	PHO91	PHO91 SGDID:S000005296, Chr XIV from 651712-649028, Genome Release 64-2-1, reverse complement, Verified ORF, "Low-affinity vacuolar phosphate transporter; exports phosphate from the vacuolar lumen to the cytosol; regulates phosphate and polyphosphate metabolism; acts upstream of Pho81p in regulation of the PHO pathway; deletion of pho84, pho87, pho89, pho90, and pho91 causes synthetic lethality; …	-	19	-	21	-	-	21	-	-	26	24	17	10	7
	MEH1	MEH1 SGDID:S000001715, Chr XI from 451434-451988, Genome Release 64-2-1, Verified ORF, "Component of the EGO and GSE complexes; EGO is involved in the regulation of microautophagy and GSE is required for proper sorting of amino acid permease Gap1p; loss results in a defect in vacuolar acidification"	-	10	-	16	12	8	-	-	-	9	8	6	-	7
	VPS30	VPS30 SGDID:S000006041, Chr XVI from 322071-323744, Genome Release 64-2-1, Verified ORF, "Subunit of phosphatidylinositol (PtdIns) 3-kinase complexes I and II; Complex I is essential in autophagy and Complex II is required for vacuolar protein sorting; required for overflow degradation of misfolded proteins when ERAD is saturated; C-terminus has a novel globular fold that is essential for autopha…	-	-	10	10	-	-	7	6	-	10	10	7	-	7
	MHP1	MHP1 SGDID:S000003578, Chr X from 361249-365445, Genome Release 64-2-1, Verified ORF, "Microtubule-associated protein involved in microtubule organization; involved in assembly and stabilization of microtubules; overproduction results in cell cycle arrest at G2 phase; similar to Drosophila protein MAP and to mammalian MAP4 proteins"	-	-	9	-	-	6	-	-	11	11	12	7	7	7
	VPS13	VPS13 SGDID:S000003963, Chr XII from 63645-54211, Genome Release 64-2-1, reverse complement, Verified ORF, "Protein involved in prospore membrane morphogenesis; heterooligomeric or homooligomeric complex; peripherally associated with membranes; involved in sporulation, vacuolar protein sorting, prospore membrane formation during sporulatoin, and protein-Golgi retention; homologous to human CHAC a…	-	-	-	-	8	-	20	-	20	42	46	19	21	7
	LAA1	LAA1 SGDID:S000003743, Chr X from 47433-41389, Genome Release 64-2-1, reverse complement, Verified ORF, "AP-1 accessory protein; colocalizes with clathrin to the late-Golgi apparatus; involved in TGN-endosome transport; physically interacts with AP-1; similar to the mammalian p200; may interact with ribosomes; YJL207C is a non-essential gene"	19	-	-	-	-	-	12	-	-	21	22	13	12	6
	KIN2	KIN2 SGDID:S000004086, Chr XII from 332590-336033, Genome Release 64-2-1, Verified ORF, "Serine/threonine protein kinase involved in regulation of exocytosis; localizes to the cytoplasmic face of the plasma membrane; KIN2 has a paralog, KIN1, that arose from the whole genome duplication"	16	-	12	-	-	-	8	-	-	15	20	10	-	6
	SKG6	SKG6 SGDID:S000001192, Chr VIII from 396659-394455, Genome Release 64-2-1, reverse complement, Verified ORF, "Integral membrane protein; localizes primarily to growing sites such as the bud tip or the cell periphery; potential Cdc28p substrate; Skg6p interacts with Zds1p and Zds2p; SKG6 has a paralog, TOS2, that arose from the whole genome duplication"	15	8	-	20	-	14	-	-	-	20	21	-	-	6
	VAM6	VAM6 SGDID:S000002235, Chr IV from 320120-316971, Genome Release 64-2-1, reverse complement, Verified ORF, "Subunit of the HOPS endocytic tethering complex; vacuole membrane protein that functions as a Rab GTPase effector, interacting with both GTP- and GDP-bound conformations of Ypt7p, facilitating tethering and promoting several membrane fusion events at the late endosome and vacuole; required …	20	-	17	16	-	-	-	-	-	14	16	9	-	6
	CYR1	CYR1 SGDID:S000003542, Chr X from 425157-431237, Genome Release 64-2-1, Verified ORF, "Adenylate cyclase; required for cAMP production and cAMP-dependent protein kinase signaling; the cAMP pathway controls a variety of cellular processes, including metabolism, cell cycle, stress response, stationary phase, and sporulation"	13	-	-	-	-	-	12	-	11	22	17	-	8	6
	RTC1	RTC1 SGDID:S000005498, Chr XV from 65350-61325, Genome Release 64-2-1, reverse complement, Verified ORF, "Subunit of the SEA (Seh1-associated) complex; SEA is a coatomer-related complex that associates dynamically with the vacuole; null mutation suppresses cdc13-1 temperature sensitivity; has N-terminal WD-40 repeats and a C-terminal RING motif"	19	6	24	24	-	-	-	-	-	11	32	-	-	6
	PKC1	PKC1 SGDID:S000000201, Chr II from 17696-14241, Genome Release 64-2-1, reverse complement, Verified ORF, "Protein serine/threonine kinase; essential for cell wall remodeling during growth; localized to sites of polarized growth and the mother-daughter bud neck; homolog of the alpha, beta, and gamma isoforms of mammalian protein kinase C (PKC)"	14	-	-	-	-	-	-	-	15	15	12	18	9	6
	FAB1	FAB1 SGDID:S000001915, Chr VI from 184502-191338, Genome Release 64-2-1, Verified ORF, "1-phosphatidylinositol-3-phosphate 5-kinase; vacuolar membrane kinase that generates phosphatidylinositol (3,5)P2, which is involved in vacuolar sorting and homeostasis"	16	-	11	10	-	-	11	-	-	11	20	-	-	6
	VPS41	VPS41 SGDID:S000002487, Chr IV from 604008-606986, Genome Release 64-2-1, Verified ORF, "Subunit of the HOPS endocytic tethering complex; vacuole membrane protein that functions as a Rab GTPase effector, interacting specifically with the GTP-bound conformation of Ypt7p, facilitating tethering, docking and promoting membrane fusion events at the late endosome and vacuole; required for both membran…	14	-	-	7	7	-	-	-	-	12	13	-	7	6
	PEP3	PEP3 SGDID:S000004138, Chr XII from 434641-437397, Genome Release 64-2-1, Verified ORF, "Component of CORVET membrane tethering complex; vacuolar peripheral membrane protein that promotes vesicular docking/fusion reactions in conjunction with SNARE proteins, required for vacuolar biogenesis"	11	-	-	-	7	-	7	-	-	-	11	7	8	6
	NPR1	NPR1 SGDID:S000005127, Chr XIV from 295509-293137, Genome Release 64-2-1, reverse complement, Verified ORF, "Protein kinase; stabilizes several plasma membrane amino acid transporters by antagonizing their ubiquitin-mediated degradation; phosphorylates Aly2p; negatively regulates Ldb19p-mediated endocytosis through phosphorylation of Ldb19p, which prevents its association with the plasma membrane…	-	-	27	23	8	-	19	-	-	-	22	13	-	6
	NAM7	NAM7 SGDID:S000004685, Chr XIII from 429627-426712, Genome Release 64-2-1, reverse complement, Verified ORF, "ATP-dependent RNA helicase of the SFI superfamily; involved in nonsense mediated mRNA decay; required for efficient translation termination at nonsense codons and targeting of NMD substrates to P-bodies; binds to the small ribosomal subunit via an interaction with Rps26; forms cytoplasmic…	-	-	13	15	-	-	-	15	-	18	21	-	18	6
	ATG13	ATG13 SGDID:S000006389, Chr XVI from 907218-909434, Genome Release 64-2-1, Verified ORF, "Regulatory subunit of the Atg1p signaling complex; stimulates Atg1p kinase activity; required for vesicle formation during autophagy and the cytoplasm-to-vacuole targeting (Cvt) pathway; contains a HORMA domain required for autophagy and for recruitment of the phosphatidylinositol 3-kinase complex subunit At…	-	-	12	11	-	-	-	6	-	10	12	8	-	6
	YBT1	YBT1 SGDID:S000003971, Chr XII from 46265-41280, Genome Release 64-2-1, reverse complement, Verified ORF, "Transporter of the ATP-binding cassette (ABC) family; involved in bile acid transport; negative regulator of vacuole fusion; regulates release of lumenal Ca2+ stores; similar to mammalian bile transporters; YBT1 has a paralog, VMR1, that arose from the whole genome duplication"	-	-	-	50	-	50	-	-	-	16	25	25	10	6
	YCF1	YCF1 SGDID:S000002542, Chr IV from 727551-723004, Genome Release 64-2-1, reverse complement, Verified ORF, "Vacuolar glutathione S-conjugate transporter; ABC-C transporter of the ATP-binding cassette family; required for vacuole fusion; forms stable complexes with vacuole fusion machinery; regulates Vam7p recruitment to vacuoles; role in detoxifying metals (Cd, Hg, As); transports GSSG that is no…	-	-	-	31	-	38	-	-	-	21	27	21	12	6
	SER33	SER33 SGDID:S000001336, Chr IX from 222490-221081, Genome Release 64-2-1, reverse complement, Verified ORF, "3-phosphoglycerate dehydrogenase; catalyzes the first step in serine and glycine biosynthesis; SER33 has a paralog, SER3, that arose from the whole genome duplication"	-	-	-	-	33	35	14	10	9	-	-	-	7	6
	NUP159	NUP159 SGDID:S000001377, Chr IX from 148709-144327, Genome Release 64-2-1, reverse complement, Verified ORF, "FG-nucleoporin component of central core of the nuclear pore complex; also part of the nuclear pore complex (NPC) cytoplasmic filaments; contributes directly to nucleocytoplasmic transport; regulates ADP release from the ATP-dependent RNA helicase Dbp5p; forms a stable association with Nu…	-	-	-	-	15	10	-	-	12	18	17	10	-	6
	LOS1	LOS1 SGDID:S000001688, Chr XI from 50051-53353, Genome Release 64-2-1, Verified ORF, "Nuclear pore protein; involved in nuclear export of pre-tRNA and in re-export of mature tRNAs after their retrograde import from the cytoplasm"	17	-	-	-	-	-	-	-	10	15	20	-	8	5
	KAP122	KAP122 SGDID:S000002984, Chr VII from 461666-464911, Genome Release 64-2-1, Verified ORF, "Karyopherin beta; responsible for import of the Toa1p-Toa2p complex into the nucleus; binds to nucleoporins Nup1p and Nup2p; may play a role in regulation of pleiotropic drug resistance"	17	-	-	-	-	-	-	-	-	21	23	11	15	5
	VPS53	VPS53 SGDID:S000003566, Chr X from 390853-388385, Genome Release 64-2-1, reverse complement, Verified ORF, "Component of the GARP (Golgi-associated retrograde protein) complex; GARP is required for the recycling of proteins from endosomes to the late Golgi, and for mitosis after DNA damage induced checkpoint arrest; required for vacuolar protein sorting; members of the GARP complex are Vps51p-Vps…	16	-	-	-	-	-	-	-	-	16	22	15	9	5
	VAC14	VAC14 SGDID:S000004378, Chr XII from 893628-896270, Genome Release 64-2-1, Verified ORF, "Enzyme regulator; involved in synthesis of phosphatidylinositol 3,5-bisphosphate, in control of trafficking of some proteins to the vacuole lumen via the MVB, and in maintenance of vacuole size and acidity; binds negative (Fig4p) and positive (Fab1p) regulators of PtdIns(3,5)P(2) to control endolysosome func…	17	-	-	-	-	-	-	-	-	19	25	17	10	5
	BNI1	BNI1 SGDID:S000005215, Chr XIV from 135383-129522, Genome Release 64-2-1, reverse complement, Verified ORF, "Formin; polarisome component; nucleates the formation of linear actin filaments, involved in cell processes such as budding and mitotic spindle orientation which require the formation of polarized actin cables, functionally redundant with BNR1"	14	-	-	-	-	-	-	-	-	15	25	13	9	5
	IMD2	IMD2 SGDID:S000001259, Chr VIII from 554396-555967, Genome Release 64-2-1, Verified ORF, "Inosine monophosphate dehydrogenase; catalyzes the rate-limiting step in GTP biosynthesis, expression is induced by mycophenolic acid resulting in resistance to the drug, expression is repressed by nutrient limitation; IMD2 has a paralog, YAR073W/YAR075W, that arose from a segmental duplication"	13	17	-	-	-	-	-	10	9	-	-	19	-	5
	VHC1	VHC1 SGDID:S000000439, Chr II from 686901-690263, Genome Release 64-2-1, Verified ORF, "Vacuolar membrane cation-chloride cotransporter (CCC); likely mediates K+ and Cl- cotransport into the vacuole; has a role in potassium homeostasis and salt tolerance; similar to mammalian electroneutral Na(+)-(K+)-C1- cotransporter family"	10	10	-	12	-	10	-	-	-	-	-	6	-	5
	MSB1	MSB1 SGDID:S000005714, Chr XV from 685767-689180, Genome Release 64-2-1, Verified ORF, "Protein of unknown function; may be involved in positive regulation of 1,3-beta-glucan synthesis and the Pkc1p-MAPK pathway; multicopy suppressor of temperature-sensitive mutations in CDC24 and CDC42, and of mutations in BEM4; potential Cdc28p substrate; relocalizes from bud neck to cytoplasm upon DNA replicat…	8	-	-	12	-	-	-	-	16	18	-	12	-	5
	UBP15	UBP15 SGDID:S000004920, Chr XIII from 874987-878679, Genome Release 64-2-1, Verified ORF, "Ubiquitin-specific protease involved in protein deubiquitination; catalytic activity regulated by an N-terminal TRAF-like domain and and C-terminal sequences; physically interacts with anaphase-promoting complex/cyclosome (APC/C) activator, Cdh1p; forms a complex with AAA peroxins Pex1p and Pex6p"	8	-	-	-	-	-	-	-	-	10	9	7	10	5
	BPT1	BPT1 SGDID:S000003938, Chr XII from 116432-121111, Genome Release 64-2-1, Verified ORF, "ABC type transmembrane transporter of MRP/CFTR family; found in vacuolar membrane, involved in the transport of unconjugated bilirubin and in heavy metal detoxification via glutathione conjugates, along with Ycf1p"	-	19	-	22	-	26	-	-	-	9	-	11	-	5
	UFD4	UFD4 SGDID:S000001493, Chr XI from 425875-421424, Genome Release 64-2-1, reverse complement, Verified ORF, "Ubiquitin-protein ligase (E3); interacts with Rpt4p and Rpt6p, two subunits of the 19S particle of the 26S proteasome; cytoplasmic E3 involved in the degradation of ubiquitin fusion proteins; relative distribution to the nucleus increases upon DNA replication stress"	-	-	15	-	-	-	18	-	-	22	35	-	19	5
	TDH1	TDH1 SGDID:S000003588, Chr X from 338271-339269, Genome Release 64-2-1, Verified ORF, "Glyceraldehyde-3-phosphate dehydrogenase (GAPDH), isozyme 1; involved in glycolysis and gluconeogenesis; tetramer that catalyzes the reaction of glyceraldehyde-3-phosphate to 1,3 bis-phosphoglycerate; detected in the cytoplasm and cell wall; protein abundance increases in response to DNA replication stress; GAP…	-	-	-	69	14	-	-	-	-	61	27	20	-	5
	PHO8	PHO8 SGDID:S000002889, Chr IV from 1420250-1418550, Genome Release 64-2-1, reverse complement, Verified ORF, "Repressible vacuolar alkaline phosphatase; regulated by levels of Pi and by Pho4p, Pho9p, Pho80p, Pho81p and Pho85p; dephosphorylates phosphotyrosyl peptides; contributes to NAD+ metabolism by producing nicotinamide riboside from NMN"	-	-	-	19	-	21	19	-	-	15	-	11	-	5
	MDN1	MDN1 SGDID:S000004096, Chr XII from 363738-349006, Genome Release 64-2-1, reverse complement, Verified ORF, "Huge dynein-related AAA-type ATPase (midasin); forms extended pre-60S particle with the Rix1 complex (Rix1p-Ipi1p-Ipi3p); acts in removal of ribosomal biogenesis factors at successive steps of pre-60S assembly and export from nucleus"	-	-	-	-	27	-	29	-	44	79	104	-	-	5
	TRA1	TRA1 SGDID:S000001141, Chr VIII from 302761-313995, Genome Release 64-2-1, Verified ORF, "Subunit of SAGA and NuA4 histone acetyltransferase complexes; interacts with acidic activators (e.g., Gal4p) which leads to transcription activation; similar to human TRRAP, which is a cofactor for c-Myc mediated oncogenic transformation"	-	-	-	-	14	-	15	-	-	33	30	-	18	5
	SEN1	SEN1 SGDID:S000004422, Chr XII from 993434-1000129, Genome Release 64-2-1, Verified ORF, "Presumed helicase and subunit of the Nrd1 complex (Nrd1p-Nab3p-Sen1p); complex interacts with the exosome to mediate 3' end formation of some mRNAs, snRNAs, snoRNAs, and CUTs; has a separate role in coordinating DNA replication with transcription, by associating with moving replication forks and preventing e…	-	-	-	-	-	-	11	-	10	14	18	11	-	5
	APL1	APL1 SGDID:S000003765, Chr X from 445923-448025, Genome Release 64-2-1, Verified ORF, "Beta-adaptin; large subunit of the clathrin associated protein complex (AP-2); involved in vesicle mediated transport; similar to mammalian beta-chain of the clathrin associated protein complex"	-	-	-	-	-	-	6	-	-	8	12	10	9	5
	MDS3	MDS3 SGDID:S000003165, Chr VII from 124698-129161, Genome Release 64-2-1, Verified ORF, "Putative component of the TOR regulatory pathway; negative regulator of early meiotic gene expression; required, with Pmd1p, for growth under alkaline conditions; has an N-terminal kelch-like domain; MDS3 has a paralog, PMD1, that arose from the whole genome duplication"	-	-	-	-	-	-	6	-	7	11	15	7	-	5
	ECM29	ECM29 SGDID:S000001022, Chr VIII from 40084-45690, Genome Release 64-2-1, Verified ORF, "Scaffold protein; assists in association of the proteasome core particle with the regulatory particle; inhibits proteasomal ATPase activity; degraded by the mature proteasome after assembly; contains HEAT-like repeats; protein increases in abundance and relocalizes from nucleus to cytoplasm upon DNA replicati…	-	-	-	-	-	-	-	-	19	21	25	16	17	5
	ASK10	ASK10 SGDID:S000003329, Chr VII from 678695-682135, Genome Release 64-2-1, Verified ORF, "Component of RNA polymerase II holoenzyme; phosphorylated in response to oxidative stress; has a role in destruction of Ssn8p; proposed to function in activation of the glycerol channel Fps1p; ASK10 has a paralog, RGC1, that arose from the whole genome duplication"	-	-	-	-	-	-	-	-	15	17	16	12	14	5
	BOI2	BOI2 SGDID:S000000916, Chr V from 393712-390590, Genome Release 64-2-1, reverse complement, Verified ORF, "Protein implicated in polar growth, functionally redundant with Boi1p; interacts with bud-emergence protein Bem1p; contains an SH3 (src homology 3) domain and a PH (pleckstrin homology) domain; BOI2 has a paralog, BOI1, that arose from the whole genome duplication"	-	-	-	-	-	-	-	-	16	31	13	17	10	5
	BOI1	BOI1 SGDID:S000000181, Chr II from 63876-66818, Genome Release 64-2-1, Verified ORF, "Protein implicated in polar growth; functionally redundant with Boi2p; interacts with bud-emergence protein Bem1p; contains an SH3 (src homology 3) domain and a PH (pleckstrin homology) domain; relocalizes from bud neck to cytoplasm upon DNA replication stress; BOI1 has a paralog, BOI2, that arose from the whole…	-	-	-	-	-	-	-	-	16	25	14	18	13	5
	YLR419W	YLR419W SGDID:S000004411, Chr XII from 958428-962735, Genome Release 64-2-1, Uncharacterized ORF, "Putative helicase with limited sequence similarity to human Rb protein; the authentic, non-tagged protein is detected in highly purified mitochondria in high-throughput studies; YLR419W is not an essential gene"	-	-	-	-	-	-	-	-	10	25	6	18	14	5
	OSH3	OSH3 SGDID:S000001115, Chr VIII from 242582-245572, Genome Release 64-2-1, Verified ORF, "Member of an oxysterol-binding protein family; this family has seven members in S. cerevisiae; family members have overlapping, redundant functions in sterol metabolism and collectively perform a function essential for viability"	19	-	-	-	-	-	-	-	18	25	-	-	11	4
	KAP104	KAP104 SGDID:S000000221, Chr II from 273703-270947, Genome Release 64-2-1, reverse complement, Verified ORF, "Transportin or cytosolic karyopherin beta 2; functions in the rg-nuclear localization signal-mediated nuclear import/reimport of mRNA-binding proteins Nab2p and Hrp1p; regulates asymmetric protein synthesis in daughter cells during mitosis"	20	-	-	-	-	-	-	-	-	20	32	-	17	4
	SNF2	SNF2 SGDID:S000005816, Chr XV from 860258-855147, Genome Release 64-2-1, reverse complement, Verified ORF, "Catalytic subunit of the SWI/SNF chromatin remodeling complex; involved in transcriptional regulation; contains DNA-stimulated ATPase activity; functions interdependently in transcriptional activation with Snf5p and Snf6p"	16	-	-	-	-	-	11	-	-	15	13	-	-	4
	PSK1	PSK1 SGDID:S000000015, Chr I from 120225-124295, Genome Release 64-2-1, Verified ORF, "PAS domain-containing serine/threonine protein kinase; coordinately regulates protein synthesis and carbohydrate metabolism and storage in response to a unknown metabolite that reflects nutritional status; PSK1 has a paralog, PSK2, that arose from the whole genome duplication"	11	-	-	-	-	-	-	-	-	7	14	6	-	4
	RTT107	RTT107 SGDID:S000001197, Chr VIII from 402966-406178, Genome Release 64-2-1, Verified ORF, "Protein implicated in Mms22-dependent DNA repair during S phase; involved in recruiting the SMC5/6 complex to double-strand breaks; DNA damage induces phosphorylation by Mec1p at one or more SQ/TQ motifs; interacts with Mms22p and Slx4p; has four BRCT domains; has a role in regulation of Ty1 transposition;…	13	-	-	-	-	-	-	-	-	10	14	6	-	4
	GDI1	GDI1 SGDID:S000000938, Chr V from 439616-440971, Genome Release 64-2-1, Verified ORF, "GDP dissociation inhibitor; regulates vesicle traffic in secretory pathways by regulating the dissociation of GDP from the Sec4/Ypt/rab family of GTP binding proteins"	11	-	-	-	-	6	11	-	-	-	15	-	-	4
	RPS9B	RPS9B SGDID:S000000393, Chr II from 604508-604514,604928-605508, Genome Release 64-2-1, Verified ORF, "Protein component of the small (40S) ribosomal subunit; homologous to mammalian ribosomal protein S9 and bacterial S4; RPS9B has a paralog, RPS9A, that arose from the whole genome duplication"	12	-	-	-	-	-	-	-	-	16	13	-	16	4
	CNM67	CNM67 SGDID:S000005169, Chr XIV from 224469-222724, Genome Release 64-2-1, reverse complement, Verified ORF, "Component of the spindle pole body outer plaque; required for spindle orientation and mitotic nuclear migration; CNM67 has a paralog, ADY3, that arose from the whole genome duplication"	10	-	-	10	-	-	6	6	-	-	-	-	-	4
	HER1	HER1 SGDID:S000005753, Chr XV from 762825-766565, Genome Release 64-2-1, Verified ORF, "Protein of unknown function; required for proliferation or remodeling of the ER that is caused by overexpression of Hmg2p; may interact with ribosomes, based on co-purification experiments; HER1 has a paralog, GIP3, that arose from the whole genome duplication"	9	-	-	-	-	-	-	-	-	8	9	-	7	4
	AVO1	AVO1 SGDID:S000005438, Chr XV from 181682-185212, Genome Release 64-2-1, Verified ORF, "Component of a membrane-bound complex containing the Tor2p kinase; contains Tor2p kinase and other proteins; may have a role in regulation of cell growth"	7	-	12	10	-	-	6	-	-	-	-	-	-	4
	BUD6	BUD6 SGDID:S000004311, Chr XII from 771684-769318, Genome Release 64-2-1, reverse complement, Verified ORF, "Actin- and formin-interacting protein; participates in actin cable assembly and organization as a nucleation-promoting factor (NPF) for formins Bni1p and Bnr1p; a triple helical coiled-coil domain in the C-terminal region interacts with Bni1p; involved in polarized cell growth; isolated as…	7	-	-	-	-	-	-	-	6	-	7	11	-	4
	YLL007C	YLL007C SGDID:S000003930, Chr XII from 136299-134302, Genome Release 64-2-1, reverse complement, Uncharacterized ORF, "Putative protein of unknown function; green fluorescent protein (GFP)-fusion protein localizes to the cytoplasm; YLL007C is not an essential gene"	6	-	6	6	-	-	-	-	-	-	6	-	-	4
	UBR1	UBR1 SGDID:S000003416, Chr VII from 865753-859901, Genome Release 64-2-1, reverse complement, Verified ORF, "E3 ubiquitin ligase (N-recognin); heterodimerizes with Rad6p to ubiquitinate substrates in the N-end rule pathway; role in endoplasmic reticulum-associated protein degradation (ERAD) in the absence of canonical ER membrane ligases or after stress; major role in targeting misfolded cytosoli…	6	-	-	-	-	-	-	-	7	9	-	-	9	4
	NTH1	NTH1 SGDID:S000002408, Chr IV from 452475-450220, Genome Release 64-2-1, reverse complement, Verified ORF, "Neutral trehalase, degrades trehalose; required for thermotolerance and may mediate resistance to other cellular stresses; may be phosphorylated by Cdc28p; inhibited by Dcs1p; NTH1 has a paralog, NTH2, that arose from the whole genome duplication"	-	28	-	-	-	-	-	-	-	9	-	7	8	4
	ENA2	ENA2 SGDID:S000002446, Chr IV from 534582-531307, Genome Release 64-2-1, reverse complement, Verified ORF, "P-type ATPase sodium pump; involved in Na+ efflux to allow salt tolerance; likely not involved in Li+ efflux"	-	22	-	-	-	15	-	29	26	-	-	-	-	4
	MYO4	MYO4 SGDID:S000000027, Chr I from 92270-87855, Genome Release 64-2-1, reverse complement, Verified ORF, "Type V myosin motor involved in actin-based transport of cargos; required for mRNA transport, including ASH1 mRNA, and facilitating the growth and movement of ER tubules into the growing bud along with She3p; MYO4 has a paralog, MYO2, that arose from the whole genome duplication"	-	-	19	-	-	-	-	-	-	28	28	17	-	4
	MTR4	MTR4 SGDID:S000003586, Chr X from 342522-345743, Genome Release 64-2-1, Verified ORF, "ATP-dependent 3'-5' RNA helicase of the DExD/H family; involved in nuclear RNA processing and degradation both as a component of TRAMP complex and in TRAMP-independent processes; TRAMP unwinds RNA duplexes, with Mtr4p unwinding activity stimulated by Pap2p/Air2p but not dependent on ongoing polyadenylation; con…	-	-	9	-	-	-	-	-	-	15	26	-	19	4
	ECL1	ECL1 SGDID:S000003378, Chr VII from 784858-784223, Genome Release 64-2-1, reverse complement, Verified ORF, "Protein of unknown function; mitochondrial-dependent role in the extension of chronological lifespan; overexpression increases oxygen consumption and respiratory activity while deletion results in reduced oxygen consumption under conditions of caloric restriction; induced by iron homeostas…	-	-	7	8	-	-	6	7	-	-	-	-	-	4
	PMC1	PMC1 SGDID:S000002974, Chr VII from 485921-489442, Genome Release 64-2-1, Verified ORF, "Vacuolar Ca2+ ATPase involved in depleting cytosol of Ca2+ ions; prevents growth inhibition by activation of calcineurin in the presence of elevated concentrations of calcium; similar to mammalian PMCA1a"	-	-	-	15	-	22	-	-	-	-	7	9	-	4
	YNL115C	YNL115C SGDID:S000005059, Chr XIV from 412053-410119, Genome Release 64-2-1, reverse complement, Uncharacterized ORF, "Putative protein of unknown function; green fluorescent protein (GFP)-fusion protein localizes to mitochondria; YNL115C is not an essential gene"	-	-	-	15	-	-	-	13	11	-	-	6	-	4
	YRF1-3	YRF1-3 SGDID:S000003528, Chr VII from 1084864-1084882,1085031-1090591, Genome Release 64-2-1, Verified ORF, "Helicase encoded by the Y' element of subtelomeric regions; highly expressed in the mutants lacking the telomerase component TLC1; potentially phosphorylated by Cdc28p"	-	-	-	8	-	-	-	-	8	9	13	-	-	4
	ARF3	ARF3 SGDID:S000005620, Chr XV from 502795-503346, Genome Release 64-2-1, Verified ORF, "Glucose-repressible ADP-ribosylation factor; GTPase of the Ras superfamily involved in regulating cell polarity and invasive growth; also has mRNA binding activity"	-	-	-	6	-	-	6	-	-	8	-	6	-	4
	RTS1	RTS1 SGDID:S000005540, Chr XV from 357674-359947, Genome Release 64-2-1, Verified ORF, "B-type regulatory subunit of protein phosphatase 2A (PP2A); Rts1p and Cdc55p are alternative regulatory subunits for PP2A catalytic subunits, Pph21p and Pph22p; PP2A-Rts1p protects cohesin when recruited by Sgo1p to the pericentromere; highly enriched at centromeres in the absence of Cdc55p; required for maint…	-	-	-	-	19	13	-	-	-	-	16	8	-	4
	RPS9A	RPS9A SGDID:S000006002, Chr XVI from 404950-404956,405458-406044, Genome Release 64-2-1, Verified ORF, "Protein component of the small (40S) ribosomal subunit; homologous to mammalian ribosomal protein S9 and bacterial S4; RPS9A has a paralog, RPS9B, that arose from the whole genome duplication"	-	-	-	-	19	-	-	12	13	-	-	12	-	4
	NUP133	NUP133 SGDID:S000001790, Chr XI from 592825-596298, Genome Release 64-2-1, Verified ORF, "Subunit of Nup84p subcomplex of nuclear pore complex (NPC); contributes to nucleocytoplasmic transport, NPC biogenesis; is involved in establishment of a normal nucleocytoplasmic concentration gradient of GTPase Gsp1p; also plays roles in several processes that may require localization of genes or chromosome…	-	-	-	-	13	-	-	-	-	-	15	12	8	4
	CDC53	CDC53 SGDID:S000002290, Chr IV from 224304-226751, Genome Release 64-2-1, Verified ORF, "Cullin; structural protein of SCF complexes (which also contain Skp1p, Cdc34p, Hrt1p and an F-box protein) involved in ubiquitination; SCF promotes the G1-S transition by targeting G1 cyclins and the Cln-CDK inhibitor Sic1p for degradation"	-	-	-	-	11	16	-	-	-	-	15	-	14	4
	JSN1	JSN1 SGDID:S000003851, Chr X from 598336-595061, Genome Release 64-2-1, reverse complement, Verified ORF, "Member of the Puf family of RNA-binding proteins; interacts with mRNAs encoding membrane-associated proteins; involved in localizing the Arp2/3 complex to mitochondria; overexpression causes increased sensitivity to benomyl; JSN1 has a paralog, PUF2, that arose from the whole genome duplicat…	-	-	-	-	6	-	-	-	-	12	10	9	-	4
	VTC2	VTC2 SGDID:S000001890, Chr VI from 131810-134296, Genome Release 64-2-1, Verified ORF, "Subunit of vacuolar transporter chaperone (VTC) complex; involved in membrane trafficking, vacuolar polyphosphate accumulation, microautophagy and non-autophagic vacuolar fusion; VTC2 has a paralog, VTC3, that arose from the whole genome duplication"	-	-	-	-	-	42	-	-	-	22	-	20	16	4
	USO1	USO1 SGDID:S000002216, Chr IV from 345665-351037, Genome Release 64-2-1, Verified ORF, "Essential protein involved in vesicle-mediated ER to Golgi transport; binds membranes and functions during vesicle docking to the Golgi; required for assembly of the ER-to-Golgi SNARE complex"	-	-	-	-	-	-	19	-	17	26	26	-	-	4
	FUN30	FUN30 SGDID:S000000017, Chr I from 114919-118314, Genome Release 64-2-1, Verified ORF, "Snf2p family member with ATP-dependent chromatin remodeling activity; has a role in silencing at the mating type locus, telomeres and centromeres; enriched at centromeres and is required for correct chromatin structure around centromeres, as well as at the boundary element of the silent HMR; recruited to DNA d…	-	-	-	-	-	-	15	-	18	18	29	-	-	4
	SEC1	SEC1 SGDID:S000002571, Chr IV from 784215-782041, Genome Release 64-2-1, reverse complement, Verified ORF, "Sm-like protein involved in docking and fusion of exocytic vesicles; binds to assembled SNARE complexes at the membrane and stimulates membrane fusion; localization to sites of secretion (bud neck and bud tip) is dependent on SNARE function; interacts directly with essential exocyst subunit…	-	-	-	-	-	-	13	-	-	13	14	-	13	4
	KAP114	KAP114 SGDID:S000003210, Chr VII from 45445-48459, Genome Release 64-2-1, Verified ORF, "Karyopherin, responsible for nuclear import of specific proteins; cargoes include Spt15p, Sua7p, histones H2A and H2B, and Nap1p; amino terminus shows similarity to those of other importins, particularly Cse1p; localization is primarily nuclear; function is regulated by sumoylation; protein abundance increase…	-	-	-	-	-	-	11	-	-	-	22	13	11	4
	AKL1	AKL1 SGDID:S000000263, Chr II from 360187-356861, Genome Release 64-2-1, reverse complement, Verified ORF, "Ser-Thr protein kinase; member (with Ark1p and Prk1p) of the Ark kinase family; involved in endocytosis and actin cytoskeleton organization"	-	-	-	-	-	-	11	-	-	22	27	9	-	4
	TAO3	TAO3 SGDID:S000001391, Chr IX from 113237-106107, Genome Release 64-2-1, reverse complement, Verified ORF, "Component of the RAM signaling network; is involved in regulation of Ace2p activity and cellular morphogenesis, interacts with protein kinase Cbk1p and also with Kic1p"	-	-	-	-	-	-	13	-	26	28	17	-	-	4
	SCY1	SCY1 SGDID:S000003051, Chr VII from 353058-355472, Genome Release 64-2-1, Verified ORF, "Putative kinase; suppressor of GTPase mutant, similar to bovine rhodopsin kinase"	-	-	-	-	-	-	12	-	-	12	-	11	9	4
	SNF1	SNF1 SGDID:S000002885, Chr IV from 1412373-1414274, Genome Release 64-2-1, Verified ORF, "AMP-activated serine/threonine protein kinase; found in a complex containing Snf4p and members of the Sip1p/Sip2p/Gal83p family; required for transcription of glucose-repressed genes, thermotolerance, sporulation, and peroxisome biogenesis; involved in regulation of the nucleocytoplasmic shuttling of Hxk2p; …	-	-	-	-	-	-	9	-	-	-	20	21	13	4
	SEC6	SEC6 SGDID:S000001330, Chr IX from 235474-233057, Genome Release 64-2-1, reverse complement, Verified ORF, "Essential 88kDa subunit of the exocyst complex; the exocyst mediates polarized targeting and tethering of post-Golgi secretory vesicles to active sites of exocytosis at the plasma membrane prior to SNARE-mediated fusion; anchors the assembled complex to sites of secretion; interacts with SM…	-	-	-	-	-	-	8	-	-	-	12	10	9	4
	EMW1	EMW1 SGDID:S000005257, Chr XIV from 48022-45308, Genome Release 64-2-1, reverse complement, Verified ORF, "Essential conserved protein with a role in cell wall integrity; contains six TPR (tetratricopeptide repeat) domains clustered in the C-terminal region; conditional mutant is suppressed by overexpression of GFA1; protein abundance increases in response to DNA replication stress"	-	-	-	-	-	-	7	-	-	-	16	18	18	4
	SHE4	SHE4 SGDID:S000005561, Chr XV from 400104-397735, Genome Release 64-2-1, reverse complement, Verified ORF, "Protein containing a UCS (UNC-45/CRO1/SHE4) domain; binds to myosin motor domains to regulate myosin function; involved in endocytosis, polarization of the actin cytoskeleton, and asymmetric mRNA localization"	-	-	-	-	-	-	6	-	-	-	16	11	12	4
	SSK2	SSK2 SGDID:S000005314, Chr XIV from 685433-680694, Genome Release 64-2-1, reverse complement, Verified ORF, "MAP kinase kinase kinase of HOG1 mitogen-activated signaling pathway; interacts with Ssk1p, leading to autophosphorylation and activation of Ssk2p which phosphorylates Pbs2p; also mediates actin cytoskeleton recovery from osmotic stress; a HOG-independent function of Ssk2p mediates the cal…	-	-	-	-	-	-	-	-	13	14	18	6	-	4
	NMD2	NMD2 SGDID:S000001119, Chr VIII from 255637-252374,255756-255751, Genome Release 64-2-1, reverse complement, Verified ORF, "Protein involved in the nonsense-mediated mRNA decay (NMD) pathway; interacts with Nam7p and Upf3p; involved in telomere maintenance"	-	-	-	-	-	-	-	-	9	-	14	18	10	4
	PUF3	PUF3 SGDID:S000003936, Chr XII from 124714-122075, Genome Release 64-2-1, reverse complement, Verified ORF, "Protein of the mitochondrial outer surface; links the Arp2/3 complex with the mitochore during anterograde mitochondrial movement; also binds to and promotes degradation of mRNAs for select nuclear-encoded mitochondrial proteins"	-	-	-	-	-	-	-	-	9	15	13	-	8	4
	IRA1	IRA1 SGDID:S000000344, Chr II from 526628-517350, Genome Release 64-2-1, reverse complement, Verified ORF, "GTPase-activating protein; negatively regulates RAS by converting it from the GTP- to the GDP-bound inactive form, required for reducing cAMP levels under nutrient limiting conditions, mediates membrane association of adenylate cyclase; mutations cause catalase T deficiency, defective glyco…	-	-	-	-	-	-	-	-	10	16	17	6	-	4
	BEM2	BEM2 SGDID:S000000957, Chr V from 482848-476345, Genome Release 64-2-1, reverse complement, Verified ORF, "Rho GTPase activating protein (RhoGAP); involved in the control of cytoskeleton organization and cellular morphogenesis; required for bud emergence; potential GAP for Rho4p"	-	-	-	-	-	-	-	-	-	47	44	31	36	4
	XRN1	XRN1 SGDID:S000003141, Chr VII from 180113-175527, Genome Release 64-2-1, reverse complement, Verified ORF, "Evolutionarily-conserved 5'-3' exonuclease; component of cytoplasmic processing (P) bodies involved in mRNA decay; also enters the nucleus and positively regulates transcription initiation and elongation; plays a role in microtubule-mediated processes, filamentous growth, ribosomal RNA mat…	-	-	-	-	-	-	-	-	-	34	26	22	30	4
	SLH1	SLH1 SGDID:S000003503, Chr VII from 1031791-1037694, Genome Release 64-2-1, Verified ORF, "Putative RNA helicase related to Ski2p; involved in translation inhibition of non-poly(A) mRNAs; required for repressing propagation of dsRNA viruses"	-	-	-	-	-	-	-	-	-	24	19	9	14	4
	PIM1	PIM1 SGDID:S000000118, Chr II from 181275-177874, Genome Release 64-2-1, reverse complement, Verified ORF, "ATP-dependent Lon protease; involved in degradation of misfolded proteins in mitochondria; required for biogenesis and maintenance of mitochondria"	-	-	-	-	-	-	-	-	-	19	17	19	19	4
	MET18	MET18 SGDID:S000001390, Chr IX from 113806-116904, Genome Release 64-2-1, Verified ORF, "Component of cytosolic iron-sulfur protein assembly (CIA) machinery; acts at a late step of Fe-S cluster assembly; forms the CIA targeting complex with Cia1p and Cia2p that directs Fe-S cluster incorporation into a subset of proteins involved in methionine biosynthesis, DNA replication and repair, transcripti…	-	-	-	-	-	-	-	-	-	23	24	18	20	4
	UFD2	UFD2 SGDID:S000002349, Chr IV from 121592-118707, Genome Release 64-2-1, reverse complement, Verified ORF, "Ubiquitin chain assembly factor (E4); cooperates with a ubiquitin-activating enzyme (E1), a ubiquitin-conjugating enzyme (E2), and a ubiquitin protein ligase (E3) to conjugate ubiquitin to substrates; also functions as an E3"	-	-	-	-	-	-	-	-	-	17	20	15	20	4
	SCH9	SCH9 SGDID:S000001248, Chr VIII from 509363-511837, Genome Release 64-2-1, Verified ORF, "AGC family protein kinase; functional ortholog of mammalian S6 kinase; phosphorylated by Tor1p and required for TORC1-mediated regulation of ribosome biogenesis, translation initiation, and entry into G0 phase; involved in transactivation of osmostress-responsive genes; regulates G1 progression, cAPK activit…	-	-	-	-	-	-	-	-	-	17	19	16	10	4
	BEM3	BEM3 SGDID:S000006036, Chr XVI from 335486-332100, Genome Release 64-2-1, reverse complement, Verified ORF, "Rho GTPase activating protein (RhoGAP); involved in control of the cytoskeleton organization; targets the essential Rho-GTPase Cdc42p, which controls establishment and maintenance of cell polarity, including bud-site assembly"	-	-	-	-	-	-	-	-	-	18	17	13	8	4
	TRM3	TRM3 SGDID:S000002270, Chr IV from 258915-263225, Genome Release 64-2-1, Verified ORF, "2'-O-ribose methyltransferase; catalyzes the ribose methylation of the guanosine nucleotide at position 18 of tRNAs"	-	-	-	-	-	-	-	-	-	15	20	7	20	4
	PSP1	PSP1 SGDID:S000002913, Chr IV from 1459220-1456695, Genome Release 64-2-1, reverse complement, Verified ORF, "Asn and gln rich protein of unknown function; high-copy suppressor of POL1 (DNA polymerase alpha) and partial suppressor of CDC2 (polymerase delta) and CDC6 (pre-RC loading factor) mutations; overexpression results in growth inhibition; PSP1 has a paralog, YLR177W, that arose from the who…	-	-	-	-	-	-	-	-	-	8	11	12	9	4
	PMA2	PMA2 SGDID:S000005957, Chr XVI from 482843-485686, Genome Release 64-2-1, Verified ORF, "Plasma membrane H+-ATPase; isoform of Pma1p, involved in pumping protons out of the cell; regulator of cytoplasmic pH and plasma membrane potential"	95	-	-	-	-	81	-	-	-	-	67	-	-	3
	MON2	MON2 SGDID:S000005241, Chr XIV from 76583-71673, Genome Release 64-2-1, reverse complement, Verified ORF, "Protein with a role in endocytosis and vacuole integrity; peripheral membrane protein; interacts with and negatively regulates Arl1p; localizes to the endosome; member of the Sec7p family of proteins"	23	-	-	-	-	-	-	-	-	17	22	-	-	3
	STU2	STU2 SGDID:S000004035, Chr XII from 237703-235037, Genome Release 64-2-1, reverse complement, Verified ORF, "Microtubule-associated protein (MAP) of the XMAP215/Dis1 family; regulates microtubule dynamics during spindle orientation and metaphase chromosome alignment; interacts with spindle pole body component Spc72p"	16	-	-	-	-	-	-	-	-	-	18	12	-	3
	SEC8	SEC8 SGDID:S000006259, Chr XVI from 667676-670873, Genome Release 64-2-1, Verified ORF, "Essential 121 kDa subunit of the exocyst complex; the exocyst mediates polarized targeting and tethering of post-Golgi secretory vesicles to active sites of exocytosis at the plasma membrane prior to SNARE-mediated fusion; involved in ER and Golgi inheritance in small buds; relocalizes away from bud neck upon…	12	-	-	-	-	-	-	-	-	16	19	-	-	3
	CDC25	CDC25 SGDID:S000004301, Chr XII from 756993-752224, Genome Release 64-2-1, reverse complement, Verified ORF, "Membrane bound guanine nucleotide exchange factor; indirectly regulates adenylate cyclase through activation of Ras1p and Ras2p by stimulating the exchange of GDP for GTP; required for progression through G1; a membrane bound guanine nucleotide exchange factor is also known as a GEF or GD…	9	-	-	-	-	-	-	-	-	8	11	-	-	3
	RAD5	RAD5 SGDID:S000004022, Chr XII from 204991-208500, Genome Release 64-2-1, Verified ORF, "DNA helicase/Ubiquitin ligase; involved in error-free branch of DNA damage tolerance (DDT) pathway; proposed to promote replication fork regression during postreplication repair by template switching; stimulates synthesis of free and PCNA-bound polyubiquitin chains by Ubc13p-Mms2p; required for error-prone tr…	7	-	7	-	-	-	-	-	-	-	6	-	-	3
	TPS2	TPS2 SGDID:S000002481, Chr IV from 593893-596583, Genome Release 64-2-1, Verified ORF, "Phosphatase subunit of the trehalose-6-P synthase/phosphatase complex; involved in synthesis of the storage carbohydrate trehalose; expression is induced by stress conditions and repressed by the Ras-cAMP pathway; protein abundance increases in response to DNA replication stress"	-	21	-	-	-	-	-	-	-	-	8	-	9	3
	HXT6	HXT6 SGDID:S000002751, Chr IV from 1161320-1159608, Genome Release 64-2-1, reverse complement, Verified ORF, "High-affinity glucose transporter; member of the major facilitator superfamily, nearly identical to Hxt7p, expressed at high basal levels relative to other HXTs, repression of expression by high glucose requires SNF3; HXT6 has a paralog, HXT1, that arose from the whole genome duplication"	-	15	-	-	23	-	-	-	-	16	-	-	-	3
	SSF1	SSF1 SGDID:S000001108, Chr VIII from 229335-230696, Genome Release 64-2-1, Verified ORF, "Constituent of 66S pre-ribosomal particles; required for ribosomal large subunit maturation; functionally redundant with Ssf2p; member of the Brix family; SSF1 has a paralog, SSF2, that arose from the whole genome duplication"	-	11	-	-	-	6	-	-	-	-	-	-	7	3
	VTH2	VTH2 SGDID:S000003758, Chr X from 11475-16124, Genome Release 64-2-1, Verified ORF, "Putative membrane glycoprotein; has strong similarity to Vth1p and Pep1p/Vps10p; may be involved in vacuolar protein sorting"	-	7	-	-	7	-	-	-	19	-	-	-	-	3
	IKI3	IKI3 SGDID:S000004376, Chr XII from 892900-888851, Genome Release 64-2-1, reverse complement, Verified ORF, "Subunit of Elongator complex; Elongator is required for modification of wobble nucleosides in tRNA; maintains structural integrity of Elongator; homolog of human IKAP, mutations in which cause familial dysautonomia (FD)"	-	-	-	30	-	-	-	-	-	31	-	28	-	3
	VAC8	VAC8 SGDID:S000000739, Chr V from 128825-130561, Genome Release 64-2-1, Verified ORF, "Phosphorylated and palmitoylated vacuolar membrane protein; interacts with Atg13p, required for the cytoplasm-to-vacuole targeting (Cvt) pathway; interacts with Nvj1p to form nucleus-vacuole junctions"	-	-	-	31	-	28	-	-	-	24	-	-	-	3
	SPC42	SPC42 SGDID:S000001525, Chr XI from 358475-359566, Genome Release 64-2-1, Verified ORF, "Central plaque component of spindle pole body (SPB); involved in SPB duplication, may facilitate attachment of the SPB to the nuclear membrane"	-	-	-	12	-	-	-	-	9	8	-	-	-	3
	FET5	FET5 SGDID:S000001853, Chr VI from 49139-51007, Genome Release 64-2-1, Verified ORF, "Multicopper oxidase; integral membrane protein with similarity to Fet3p; may have a role in iron transport"	-	-	-	9	-	12	12	-	-	-	-	-	-	3
	HSP42	HSP42 SGDID:S000002578, Chr IV from 806621-807748, Genome Release 64-2-1, Verified ORF, "Small heat shock protein (sHSP) with chaperone activity; forms barrel-shaped oligomers that suppress unfolded protein aggregation; involved in cytoskeleton reorganization after heat shock; protein abundance increases and forms cytoplasmic foci in response to DNA replication stress"	-	-	-	10	-	-	-	7	6	-	-	-	-	3
	SLM4	SLM4 SGDID:S000000281, Chr II from 392293-391805, Genome Release 64-2-1, reverse complement, Verified ORF, "Component of the EGO and GSE complexes; essential for integrity and function of EGO; EGO is involved in the regulation of microautophagy and GSE is required for proper sorting of amino acid permease Gap1p; gene exhibits synthetic genetic interaction with MSS4"	-	-	-	8	-	-	-	-	-	8	6	-	-	3
	CKB2	CKB2 SGDID:S000005565, Chr XV from 405768-406544, Genome Release 64-2-1, Verified ORF, "Beta' regulatory subunit of casein kinase 2 (CK2); a Ser/Thr protein kinase with roles in cell growth and proliferation; CK2, comprised of CKA1, CKA2, CKB1 and CKB2, has many substrates including transcription factors and all RNA polymerase"	-	-	-	7	-	-	-	-	-	7	7	-	-	3
	PPH21	PPH21 SGDID:S000002292, Chr IV from 220771-219662, Genome Release 64-2-1, reverse complement, Verified ORF, "Catalytic subunit of protein phosphatase 2A (PP2A); functionally redundant with Pph22p; methylated at C terminus; forms alternate complexes with several regulatory subunits; involved in signal transduction and regulation of mitosis; forms nuclear foci upon DNA replication stress; PPH21 has…	-	-	-	7	11	8	-	-	-	-	-	-	-	3
	TPD3	TPD3 SGDID:S000000014, Chr I from 124879-126786, Genome Release 64-2-1, Verified ORF, "Regulatory subunit A of the heterotrimeric PP2A complex; the heterotrimeric protein phosphatase 2A (PP2A) complex also contains regulatory subunit Cdc55p and either catalytic subunit Pph21p or Pph22p; required for cell morphogenesis and transcription by RNA polymerase III"	-	-	-	-	35	30	-	-	-	-	22	-	-	3
	APL5	APL5 SGDID:S000006116, Chr XVI from 176223-179021, Genome Release 64-2-1, Verified ORF, "Delta adaptin-like subunit of the clathrin associated protein complex; functions in transport of alkaline phosphatase to the vacuole via the alternate pathway; suppressor of loss of casein kinase 1 function; the clathrin associated protein complex is also known as AP-3"	-	-	-	-	13	-	-	-	-	-	-	22	16	3
	RPL13B	RPL13B SGDID:S000004750, Chr XIII from 550801-550206,551207-551204, Genome Release 64-2-1, reverse complement, Verified ORF, "Ribosomal 60S subunit protein L13B; not essential for viability; homologous to mammalian ribosomal protein L13, no bacterial homolog; RPL13B has a paralog, RPL13A, that arose from the whole genome duplication"	-	-	-	-	12	-	-	11	10	-	-	-	-	3
	FRA1	FRA1 SGDID:S000003952, Chr XII from 81461-83710, Genome Release 64-2-1, Verified ORF, "Protein involved in negative regulation of iron regulon transcription; forms an iron independent complex with Fra2p, Grx3p, and Grx4p; cytosolic; mutant fails to repress transcription of iron regulon and is defective in spore formation"	-	-	-	-	8	-	-	-	-	7	11	-	-	3
	LYS20	LYS20 SGDID:S000002341, Chr IV from 133437-134723, Genome Release 64-2-1, Verified ORF, "Homocitrate synthase isozyme; catalyzes the condensation of acetyl-CoA and alpha-ketoglutarate to form homocitrate, which is the first step in the lysine biosynthesis pathway; LYS20 has a paralog, LYS21, that arose from the whole genome duplication"	-	-	-	-	7	-	16	-	-	-	-	16	-	3
	RTC5	RTC5 SGDID:S000005644, Chr XV from 546857-548560, Genome Release 64-2-1, Verified ORF, "Protein of unknown function; green fluorescent protein (GFP)-fusion protein localizes to the cytoplasm; null mutation suppresses cdc13-1 temperature sensitivity"	-	-	-	-	6	-	7	7	-	-	-	-	-	3
	SSA4	SSA4 SGDID:S000000905, Chr V from 364589-366517, Genome Release 64-2-1, Verified ORF, "Heat shock protein that is highly induced upon stress; plays a role in SRP-dependent cotranslational protein-membrane targeting and translocation; member of the HSP70 family; cytoplasmic protein that concentrates in nuclei upon starvation; SSA4 has a paralog, SSA3, that arose from the whole genome duplication"	-	-	-	-	-	24	-	29	-	-	-	-	28	3
	COT1	COT1 SGDID:S000005843, Chr XV from 907555-906236, Genome Release 64-2-1, reverse complement, Verified ORF, "Vacuolar transporter that mediates zinc transport into the vacuole; overexpression confers resistance to cobalt and rhodium; protein abundance increases in response to DNA replication stress; COT1 has a paralog, ZRC1, that arose from the whole genome duplication"	-	-	-	-	-	8	-	-	-	6	-	6	-	3
	SVL3	SVL3 SGDID:S000005953, Chr XVI from 491364-488887, Genome Release 64-2-1, reverse complement, Verified ORF, "Protein of unknown function; mutant phenotype suggests a potential role in vacuolar function; green fluorescent protein (GFP)-fusion protein localizes to the cell periphery, cytoplasm, bud, and bud neck; relocalizes from bud neck to cytoplasm upon DNA replication stress; SVL3 has a paralog…	-	-	-	-	-	7	-	-	-	-	-	14	12	3
	RRP12	RRP12 SGDID:S000005933, Chr XVI from 529723-533409, Genome Release 64-2-1, Verified ORF, "Protein required for export of the ribosomal subunits; associates with the RNA components of the pre-ribosomes; has a role in nuclear import in association with Pse1p; also plays a role in the cell cycle and the DNA damage response; contains HEAT-repeats"	-	-	-	-	-	-	21	-	-	-	35	-	29	3
	YLR072W	YLR072W SGDID:S000004062, Chr XII from 278862-280943, Genome Release 64-2-1, Uncharacterized ORF, "Protein of unknown function; green fluorescent protein (GFP)-fusion protein localizes to the cytoplasm in a punctate pattern; not an esssential gene; YLR072W has a paralog, YFL042C, that arose from the whole genome duplication"	-	-	-	-	-	-	23	-	-	8	8	-	-	3
	PBS2	PBS2 SGDID:S000003664, Chr X from 180103-178097, Genome Release 64-2-1, reverse complement, Verified ORF, "MAP kinase kinase of the HOG signaling pathway; activated under severe osmotic stress; mitophagy-specific regulator; plays a role in regulating Ty1 transposition"	-	-	-	-	-	-	15	-	13	-	17	-	-	3
	KEL1	KEL1 SGDID:S000001201, Chr VIII from 417179-413685, Genome Release 64-2-1, reverse complement, Verified ORF, "Protein required for proper cell fusion and cell morphology; functions in a complex with Kel2p to negatively regulate mitotic exit, interacts with Tem1p and Lte1p; localizes to regions of polarized growth; potential Cdc28p substrate; KEL1 has a paralog, KEL2, that arose from the whole gen…	-	-	-	-	-	-	15	-	-	18	18	-	-	3
	TPA1	TPA1 SGDID:S000000851, Chr V from 251728-253662, Genome Release 64-2-1, Verified ORF, "Poly(rA)-binding protein; involved in translation termination efficiency, mRNA poly(A) tail length and mRNA stability; interacts with Sup45p (eRF1), Sup35p (eRF3) and Pab1p; similar to human prolyl 4-hydroxylase OGFOD1; binds Fe(III) and 2-oxoglutarate"	-	-	-	-	-	-	10	-	11	-	-	-	13	3
	ADE16	ADE16 SGDID:S000004018, Chr XII from 201315-199540, Genome Release 64-2-1, reverse complement, Verified ORF, "Enzyme of 'de novo' purine biosynthesis; contains both 5-aminoimidazole-4-carboxamide ribonucleotide transformylase and inosine monophosphate cyclohydrolase activities; ADE16 has a paralog, ADE17, that arose from the whole genome duplication; ade16 ade17 mutants require adenine and histid…	-	-	-	-	-	-	10	-	6	-	13	-	-	3
	NAB6	NAB6 SGDID:S000004585, Chr XIII from 34243-37647, Genome Release 64-2-1, Verified ORF, "Putative RNA-binding protein; associates with mRNAs encoding cell wall proteins in high-throughput studies; deletion mutants display increased sensitivity to some cell wall disrupting agents; expression negatively regulated by cAMP"	-	-	-	-	-	-	9	-	-	8	-	-	8	3
	APL2	APL2 SGDID:S000001618, Chr XI from 188640-186460, Genome Release 64-2-1, reverse complement, Verified ORF, "Beta-adaptin subunit of the clathrin-associated protein (AP-1) complex; binds clathrin; involved in clathrin-dependent Golgi protein sorting; protein abundance increases in response to DNA replication stress"	-	-	-	-	-	-	9	-	-	-	12	12	-	3
	MRS6	MRS6 SGDID:S000005897, Chr XV from 1030994-1029183, Genome Release 64-2-1, reverse complement, Verified ORF, "Rab escort protein; forms a complex with the Ras-like small GTPase Ypt1p that is required for the prenylation of Ypt1p by protein geranylgeranyltransferase type II (Bet2p-Bet4p); sequence similarity to mammalian choroideraemia gene; relative distribution to the nucleus increases upon DNA …	-	-	-	-	-	-	8	-	-	-	12	9	-	3
	YPL260W	YPL260W SGDID:S000006181, Chr XVI from 49303-50958, Genome Release 64-2-1, Verified ORF, "Putative substrate of cAMP-dependent protein kinase (PKA); green fluorescent protein (GFP)-fusion protein localizes to the cytoplasm and nucleus; YPL260W is not an essential gene; protein abundance increases in response to DNA replication stress"	-	-	-	-	-	-	8	-	-	-	13	9	-	3
	BEM4	BEM4 SGDID:S000006082, Chr XVI from 246220-244319, Genome Release 64-2-1, reverse complement, Verified ORF, "Protein involved in establishment of cell polarity and bud emergence; interacts with the Rho1p small GTP-binding protein and with the Rho-type GTPase Cdc42p; involved in maintenance of proper telomere length"	-	-	-	-	-	-	7	-	-	-	9	8	-	3
	MYO1	MYO1 SGDID:S000001065, Chr VIII from 151666-157452, Genome Release 64-2-1, Verified ORF, "Type II myosin heavy chain; required for wild-type cytokinesis and cell separation; localizes to the actomyosin ring; binds to myosin light chains Mlc1p and Mlc2p through its IQ1 and IQ2 motifs respectively"	-	-	-	-	-	-	7	-	8	14	-	-	-	3
	SBE22	SBE22 SGDID:S000001145, Chr VIII from 320414-322972, Genome Release 64-2-1, Verified ORF, "Protein involved in bud growth; involved in the transport of cell wall components from the Golgi to the cell surface; similar in structure and functionally redundant with Sbe2p; SBE22 has a paralog, SBE2, that arose from the whole genome duplication"	-	-	-	-	-	-	6	-	-	-	-	7	6	3
	DOT6	DOT6 SGDID:S000000890, Chr V from 335188-333176, Genome Release 64-2-1, reverse complement, Verified ORF, "Protein involved in rRNA and ribosome biogenesis; activated in stochastic pulses of nuclear localization; binds polymerase A and C motif; subunit of the RPD3L histone deacetylase complex; has chromatin specific SANT domain; involved in telomeric gene silencing and filamentation; relative dis…	-	-	-	-	-	-	6	-	-	11	11	-	-	3
	APM4	APM4 SGDID:S000005423, Chr XV from 211995-210520, Genome Release 64-2-1, reverse complement, Verified ORF, "Cargo-binding mu subunit of AP-2; AP-2 is a heterotetrameric endocytic cargo-binding adaptor that facilitates uptake of membrane proteins during clathrin-mediated endocytosis; Apm4p is required for AP-2 function and localization, and binds cell wall stress receptor Mid2p; AP-2 is required f…	-	-	-	-	-	-	-	6	-	7	-	9	-	3
	NUP170	NUP170 SGDID:S000000175, Chr II from 75259-79767, Genome Release 64-2-1, Verified ORF, "Subunit of the inner ring of the nuclear pore complex (NPC); contributes to NPC assembly and nucleocytoplasmic transport; both Nup170p and NUP157p are similar to human Nup155p; NUP170 has a paralog, NUP157, that arose from the whole genome duplication"	-	-	-	-	-	-	-	-	16	23	-	-	10	3
	STE20	STE20 SGDID:S000000999, Chr VIII from 97937-95118, Genome Release 64-2-1, reverse complement, Verified ORF, "Cdc42p-activated signal transducing kinase; involved in pheromone response, pseudohyphal/invasive growth, vacuole inheritance, down-regulation of sterol uptake; GBB motif binds Ste4p; member of the PAK (p21-activated kinase) family"	-	-	-	-	-	-	-	-	13	-	13	-	12	3
	ADE6	ADE6 SGDID:S000003293, Chr VII from 615965-611889, Genome Release 64-2-1, reverse complement, Verified ORF, "Formylglycinamidine-ribonucleotide (FGAM)-synthetase; catalyzes a step in the 'de novo' purine nucleotide biosynthetic pathway"	-	-	-	-	-	-	-	-	9	13	14	-	-	3
	STE5	STE5 SGDID:S000002510, Chr IV from 658350-661103, Genome Release 64-2-1, Verified ORF, "Pheromone-responsive MAPK scaffold protein; couples activation of the G-protein-coupled pheromone receptor to MAPK activation; intramolecular interaction of PH and VWA domains blocks activation of assembled signaling cascade components (Ste11p, Ste7p and Fus3p) under basal conditions; Gbeta-gamma (Ste4p-Ste18p…	-	-	-	-	-	-	-	-	8	11	13	-	-	3
	PSE1	PSE1 SGDID:S000004925, Chr XIII from 892221-888952, Genome Release 64-2-1, reverse complement, Verified ORF, "Karyopherin/importin that interacts with the nuclear pore complex; acts as the nuclear import receptor for specific proteins, including Pdr1p, Yap1p, Ste12p, and Aft1p"	-	-	-	-	-	-	-	-	-	36	42	-	32	3
	NUM1	NUM1 SGDID:S000002557, Chr IV from 755628-763874, Genome Release 64-2-1, Verified ORF, "Protein required for nuclear migration; component of the mitochondria-ER-cortex-ancor (MECA); required for the association of mitochondria with the cell cortex and for accurate distribution of mitochondrial network; interacts with Mdm36p to link the ER and motochondria at the cortex; localizes to the mother ce…	-	-	-	-	-	-	-	-	-	45	36	27	-	3
	VTC4	VTC4 SGDID:S000003549, Chr X from 413399-411234, Genome Release 64-2-1, reverse complement, Verified ORF, "Vacuolar membrane polyphosphate polymerase; subunit of the vacuolar transporter chaperone (VTC) complex involved in synthesis and transfer of polyP to the vacuole; regulates membrane trafficking; role in non-autophagic vacuolar fusion; protein abundance increases in response to DNA replicati…	-	-	-	-	-	-	-	-	-	20	-	21	16	3
	SMC3	SMC3 SGDID:S000003610, Chr X from 302849-299157, Genome Release 64-2-1, reverse complement, Verified ORF, "Subunit of the multiprotein cohesin complex; required for sister chromatid cohesion in mitotic cells; also required, with Rec8p, for cohesion and recombination during meiosis; phylogenetically conserved SMC chromosomal ATPase family member"	-	-	-	-	-	-	-	-	-	17	23	13	-	3
	NMD5	NMD5 SGDID:S000003893, Chr X from 669522-672668, Genome Release 64-2-1, Verified ORF, "Karyopherin; a carrier protein involved in nuclear import of proteins; importin beta homolog"	-	-	-	-	-	-	-	-	-	17	28	-	15	3
	VIP1	VIP1 SGDID:S000004402, Chr XII from 937541-940981, Genome Release 64-2-1, Verified ORF, "Inositol hexakisphosphate and inositol heptakisphosphate kinase; inositol heptakisphosphate (IP7) production is important for phosphate signaling; involved in cortical actin cytoskeleton function, and invasive pseudohyphal growth analogous to S. pombe asp1; inositol hexakisphosphate is also known as IP6"	-	-	-	-	-	-	-	-	-	19	23	-	15	3
	SSD1	SSD1 SGDID:S000002701, Chr IV from 1049392-1045640, Genome Release 64-2-1, reverse complement, Verified ORF, "Translational repressor with a role in polar growth and wall integrity; regulated by Cbk1p phosphorylation to effect bud-specific translational control and localization of specific mRNAs; interacts with TOR pathway components; contains a functional N-terminal nuclear localization sequence…	-	-	-	-	-	-	-	-	-	17	-	17	9	3
	YDR161W	YDR161W SGDID:S000002568, Chr IV from 779043-780206, Genome Release 64-2-1, Uncharacterized ORF, "Putative protein of unknown function; non-essential gene; proposed function in rRNA and ribosome biosynthesis based on transcriptional co-regulation; genetic interactions suggest a role in ER-associated protein degradation (ERAD)"	-	-	-	-	-	-	-	-	-	13	9	-	9	3
	RKR1	RKR1 SGDID:S000004861, Chr XIII from 768039-763351, Genome Release 64-2-1, reverse complement, Verified ORF, "RING domain E3 ubiquitin ligase; involved in ubiquitin-mediated degradation of non-stop proteins; component of ribosome-bound RQC (ribosome quality control) complex required for degradation of polypeptides arising from stalled translation; degrades products of mRNAs lacking a termination …	-	-	-	-	-	-	-	-	-	17	17	-	18	3
	SKI3	SKI3 SGDID:S000006393, Chr XVI from 912664-916962, Genome Release 64-2-1, Verified ORF, "Ski complex component and TPR protein; mediates 3'-5' RNA degradation by the cytoplasmic exosome; null mutants have superkiller phenotype of increased viral dsRNAs and are synthetic lethal with mutations in 5'-3' mRNA decay; mutations in the human ortholog, TTC37, causes Syndromic diarrhea/Trichohepatoenteric…	-	-	-	-	-	-	-	-	-	17	18	12	-	3
	COG8	COG8 SGDID:S000004536, Chr XIII from 131572-129749, Genome Release 64-2-1, reverse complement, Verified ORF, "Component of the conserved oligomeric Golgi complex; a cytosolic tethering complex (Cog1p through Cog8p) that functions in protein trafficking to mediate fusion of transport vesicles to Golgi compartments"	-	-	-	-	-	-	-	-	-	17	16	-	8	3
	SMC1	SMC1 SGDID:S000001886, Chr VI from 119429-123106, Genome Release 64-2-1, Verified ORF, "Subunit of the multiprotein cohesin complex; essential protein involved in chromosome segregation and in double-strand DNA break repair; SMC chromosomal ATPase family member, binds DNA with a preference for DNA with secondary structure"	-	-	-	-	-	-	-	-	-	15	13	10	-	3
	PSK2	PSK2 SGDID:S000005405, Chr XV from 243497-246802, Genome Release 64-2-1, Verified ORF, "PAS-domain containing serine/threonine protein kinase; regulates sugar flux and translation in response to an unknown metabolite by phosphorylating Ugp1p and Gsy2p (sugar flux) and Caf20p, Tif11p and Sro9p (translation); PSK2 has a paralog, PSK1, that arose from the whole genome duplication"	-	-	-	-	-	-	-	-	-	14	15	7	-	3
	VPS35	VPS35 SGDID:S000003690, Chr X from 133935-131101, Genome Release 64-2-1, reverse complement, Verified ORF, "Endosomal subunit of membrane-associated retromer complex; required for retrograde transport; receptor that recognizes retrieval signals on cargo proteins, forms subcomplex with Vps26p and Vps29p that selects cargo proteins for retrieval; interacts with Ypt7p"	-	-	-	-	-	-	-	-	-	10	15	-	11	3
	WHI3	WHI3 SGDID:S000005141, Chr XIV from 269593-267608, Genome Release 64-2-1, reverse complement, Verified ORF, "RNA binding protein that sequesters CLN3 mRNA in cytoplasmic foci; regulates genes involved in the cell cycle, sister chromatid cohesion, and stress response; acts as a cytoplasmic retention factor for Cdc28p and associated cyclins; regulates cell fate and dose-dependently regulates the cr…	-	-	-	-	-	-	-	-	-	9	10	8	-	3
	DUR1,2	DUR1,2 SGDID:S000000412, Chr II from 642210-636703, Genome Release 64-2-1, reverse complement, Verified ORF, "Urea amidolyase; contains both urea carboxylase and allophanate hydrolase activities, degrades urea to CO2 and NH3; expression sensitive to nitrogen catabolite repression and induced by allophanate, an intermediate in allantoin degradation; protein abundance increases in response to DNA r…	-	-	-	-	-	-	-	-	-	13	-	19	17	3
	KCC4	KCC4 SGDID:S000000529, Chr III from 79162-82275, Genome Release 64-2-1, Verified ORF, "Protein kinase of the bud neck involved in the septin checkpoint; associates with septin proteins, negatively regulates Swe1p by phosphorylation, shows structural homology to bud neck kinases Gin4p and Hsl1p; KCC4 has a paralog, GIN4, that arose from the whole genome duplication"	-	-	-	-	-	-	-	-	-	10	7	7	-	3
	LYS2	LYS2 SGDID:S000000319, Chr II from 473926-469748, Genome Release 64-2-1, reverse complement, Verified ORF, "Alpha aminoadipate reductase; catalyzes the reduction of alpha-aminoadipate to alpha-aminoadipate 6-semialdehyde, which is the fifth step in biosynthesis of lysine; activation requires posttranslational phosphopantetheinylation by Lys5p"	-	-	-	-	-	-	-	-	-	9	18	-	19	3
	KEL3	KEL3 SGDID:S000006184, Chr XVI from 46506-44551, Genome Release 64-2-1, reverse complement, Verified ORF, "Cytoplasmic protein of unknown function"	-	-	-	-	-	-	-	-	-	7	-	7	10	3
	SAP1	SAP1 SGDID:S000000849, Chr V from 246503-243810, Genome Release 64-2-1, reverse complement, Verified ORF, "Putative ATPase of the AAA family; interacts with the Sin1p transcriptional repressor in the two-hybrid system"	-	-	-	-	-	-	-	-	-	9	6	9	-	3
	VTC3	VTC3 SGDID:S000005940, Chr XVI from 517018-514511, Genome Release 64-2-1, reverse complement, Verified ORF, "Subunit of vacuolar transporter chaperone (VTC) complex; involved in membrane trafficking, vacuolar polyphosphate accumulation, microautophagy and non-autophagic vacuolar fusion; VTC3 has a paralog, VTC2, that arose from the whole genome duplication"	-	-	-	-	-	-	-	-	-	8	16	16	-	3
	SOG2	SOG2 SGDID:S000005880, Chr XV from 1000828-998453, Genome Release 64-2-1, reverse complement, Verified ORF, "Key component of the RAM signaling network; required for proper cell morphogenesis and cell separation after mitosis"	-	-	-	-	-	-	-	-	-	9	12	-	6	3
	AFG1	AFG1 SGDID:S000000778, Chr V from 56571-58100, Genome Release 64-2-1, Verified ORF, "Protein that may act as a chaperone for cytochrome c oxidase subunits; conserved protein; may act as a chaperone in the degradation of misfolded or unassembled cytochrome c oxidase subunits; localized to matrix face of the mitochondrial inner membrane; member of the AAA family but lacks a protease domain"	-	-	-	-	-	-	-	-	-	7	11	-	6	3
	YLL032C	YLL032C SGDID:S000003955, Chr XII from 76747-74270, Genome Release 64-2-1, reverse complement, Verified ORF, "Protein of unknown function; may interact with ribosomes, based on co-purification experiments; green fluorescent protein (GFP)-fusion protein localizes to the cytoplasm; YLL032C is not an essential gene"	-	-	-	-	-	-	-	-	-	8	-	10	7	3
	NUP192	NUP192 SGDID:S000003576, Chr X from 373799-368748, Genome Release 64-2-1, reverse complement, Verified ORF, "Essential subunit of the inner ring of the nuclear pore complex (NPC); contributes to nucleocytoplasmic transport; homologous to human NUP205"	-	-	-	-	-	-	-	-	-	-	37	16	14	3
	OSH2	OSH2 SGDID:S000002177, Chr IV from 421514-417663, Genome Release 64-2-1, reverse complement, Verified ORF, "Member of an oxysterol-binding protein family with seven members; in S. cerevisiae, family members have overlapping, redundant functions in sterol metabolism and collectively perform a function essential for viability; OSH2 has a paralog, SWH1, that arose from the whole genome duplication"	-	-	-	-	-	-	-	-	-	-	29	16	17	3
	SPA2	SPA2 SGDID:S000003944, Chr XII from 100947-105347, Genome Release 64-2-1, Verified ORF, "Component of the polarisome; functions in actin cytoskeletal organization during polarized growth; acts as a scaffold for Mkk1p and Mpk1p cell wall integrity signaling components; potential Cdc28p substrate; coding sequence contains length polymorphisms in different strains; SPA2 has a paralog, SPH1, that aro…	-	-	-	-	-	-	-	-	-	-	19	17	14	3
	CTR9	CTR9 SGDID:S000005505, Chr XV from 52788-49555, Genome Release 64-2-1, reverse complement, Verified ORF, "Component of the Paf1p complex involved in transcription elongation; binds to and modulates the activity of RNA polymerases I and II; required for expression of a subset of genes, including cyclin genes; involved in SER3 repression by helping to maintain SRG1 transcription-dependent nucleosom…	-	-	-	-	-	-	-	-	-	-	25	14	17	3
	CCR4	CCR4 SGDID:S000000019, Chr I from 113359-110846, Genome Release 64-2-1, reverse complement, Verified ORF, "Component of the CCR4-NOT transcriptional complex; CCR4-NOT is involved in regulation of gene expression; component of the major cytoplasmic deadenylase, which is involved in mRNA poly(A) tail shortening"	-	-	-	-	-	-	-	-	-	-	18	16	15	3
	RIA1	RIA1 SGDID:S000005107, Chr XIV from 330073-326741, Genome Release 64-2-1, reverse complement, Verified ORF, "Cytoplasmic GTPase/eEF2-like factor involved in ribosomal biogenesis; with Sdo1p, a guanine nucleotide exchange factor (GEF), promotes release of Tif6p from 60S ribosomal subunits in the cytoplasm so that they can assemble with 40S subunits to generate mature ribosomes; required for qualit…	-	-	-	-	-	-	-	-	-	-	24	21	20	3
	RGD2	RGD2 SGDID:S000001847, Chr VI from 40421-42565, Genome Release 64-2-1, Verified ORF, "GTPase-activating protein (RhoGAP) for Cdc42p and Rho5p; relocalizes from bud neck to cytoplasm upon DNA replication stress"	-	-	-	-	-	-	-	-	-	-	12	13	9	3
	SEC5	SEC5 SGDID:S000002573, Chr IV from 789221-786306, Genome Release 64-2-1, reverse complement, Verified ORF, "Essential 107kDa subunit of the exocyst complex; the exocyst mediates polarized targeting and tethering of post-Golgi secretory vesicles to active sites of exocytosis at the plasma membrane prior to SNARE-mediated fusion; involved in assembly of the exocyst complex; required with Sec3p for …	-	-	-	-	-	-	-	-	-	-	10	9	7	3
	TIF4632	TIF4632 SGDID:S000003017, Chr VII from 409604-406860, Genome Release 64-2-1, reverse complement, Verified ORF, "Translation initiation factor eIF4G; subunit of the mRNA cap-binding protein complex (eIF4F) that also contains eIF4E (Cdc33p); associates with the poly(A)-binding protein Pab1p, also interacts with eIF4A (Tif1p); TIF4632 has a paralog, TIF4631, that arose from the whole genome duplicat…	-	-	-	-	-	-	-	-	-	-	11	16	12	3
	COG6	COG6 SGDID:S000004986, Chr XIV from 551987-549468, Genome Release 64-2-1, reverse complement, Verified ORF, "Component of the conserved oligomeric Golgi complex; a cytosolic tethering complex (Cog1p through Cog8p) that functions in protein trafficking to mediate fusion of transport vesicles to Golgi compartments"	-	-	-	-	-	-	-	-	-	-	10	9	8	3
	UBP12	UBP12 SGDID:S000003733, Chr X from 63805-67569, Genome Release 64-2-1, Verified ORF, "Ubiquitin-specific protease; cleaves ubiquitin from ubiquitinated proteins; present in the nucleus and cytoplasm"	-	-	-	-	-	-	-	-	-	-	7	8	8	3
	DOP1	DOP1 SGDID:S000002548, Chr IV from 739997-734901, Genome Release 64-2-1, reverse complement, Verified ORF, "Golgi-localized, leucine-zipper domain containing protein; involved in endosome to Golgi transport, organization of the ER, establishing cell polarity, and morphogenesis; detected in highly purified mitochondria in high-throughput studies"	29	-	-	-	-	-	-	-	-	-	-	-	18	2
	SMY1	SMY1 SGDID:S000001562, Chr XI from 286603-288573, Genome Release 64-2-1, Verified ORF, "Kinesin-like myosin passenger-protein; interacts with Myo2p; controls actin cable structure and dynamics; proposed to be involved in exocytosis"	11	-	-	-	-	-	-	-	-	-	-	-	9	2
	KAP120	KAP120 SGDID:S000006046, Chr XVI from 313388-316486, Genome Release 64-2-1, Verified ORF, "Karyopherin responsible for the nuclear import of Rpf1p; Rpf1p is a ribosome maturation factor"	11	-	-	-	-	-	-	-	-	-	12	-	-	2
	BMT6	BMT6 SGDID:S000004053, Chr XII from 264157-265254, Genome Release 64-2-1, Verified ORF, "Methyltransferase required for m3U2843 methylation of the 25S rRNA; S-adenosylmethionine-dependent; green fluorescent protein (GFP)-fusion protein localizes to the cytoplasm; YLR063W is not an essential gene"	10	-	-	-	-	-	-	-	-	-	9	-	-	2
	HAL5	HAL5 SGDID:S000003701, Chr X from 109461-106894, Genome Release 64-2-1, reverse complement, Verified ORF, "Putative protein kinase; overexpression increases sodium and lithium tolerance, whereas gene disruption increases cation and low pH sensitivity and impairs potassium uptake, suggesting a role in regulation of Trk1p and/or Trk2p transporters; HAL5 has a paralog, KKQ8, that arose from the whol…	9	-	-	-	-	-	-	-	-	-	-	7	-	2
	VCX1	VCX1 SGDID:S000002286, Chr IV from 232652-233887, Genome Release 64-2-1, Verified ORF, "Vacuolar membrane antiporter with Ca2+/H+ and K+/H+ exchange activity; involved in control of cytosolic Ca2+ and K+ concentrations; has similarity to sodium/calcium exchangers, including the bovine Na+/Ca2+,K+ antiporter"	9	-	-	12	-	-	-	-	-	-	-	-	-	2
	TOF1	TOF1 SGDID:S000005217, Chr XIV from 122883-126599, Genome Release 64-2-1, Verified ORF, "Subunit of a replication-pausing checkpoint complex; Tof1p-Mrc1p-Csm3p acts at the stalled replication fork to promote sister chromatid cohesion after DNA damage, facilitating gap repair of damaged DNA; interacts with the MCM helicase; relocalizes to the cytosol in response to hypoxia"	10	-	-	-	-	-	-	-	-	-	9	-	-	2
	VPS16	VPS16 SGDID:S000005966, Chr XVI from 467260-469656, Genome Release 64-2-1, Verified ORF, "Subunit of the HOPS and the CORVET complexes; part of the Class C Vps complex essential for membrane docking and fusion at Golgi-to-endosome and endosome-to-vacuole protein transport stages"	10	-	-	-	-	-	-	-	-	-	10	-	-	2
	SLS1	SLS1 SGDID:S000004129, Chr XII from 423473-421542, Genome Release 64-2-1, reverse complement, Verified ORF, "Mitochondrial membrane protein; coordinates expression of mitochondrially-encoded genes; may facilitate delivery of mRNA to membrane-bound translation machinery"	8	-	-	-	-	-	-	-	-	-	7	-	-	2
	BLM10	BLM10 SGDID:S000001887, Chr VI from 123479-129910, Genome Release 64-2-1, Verified ORF, "Proteasome activator; binds the core proteasome (CP) and stimulates proteasome-mediated protein degradation by inducing gate opening; required for sequestering CP into proteasome storage granule (PSG) during quiescent phase and for nuclear import of CP in proliferating cells; required for resistance to bleomy…	9	-	-	-	-	-	-	-	-	-	7	-	-	2
	PSY2	PSY2 SGDID:S000005145, Chr XIV from 263203-260627, Genome Release 64-2-1, reverse complement, Verified ORF, "Subunit of protein phosphatase PP4 complex; Pph3p and Psy2p form the active complex, Psy4p may provide additional substrate specificity; regulates recovery from the DNA damage checkpoint, the gene conversion- and single-strand annealing-mediated pathways of meiotic double-strand break repa…	7	-	-	-	-	-	-	-	-	-	6	-	-	2
	BPH1	BPH1 SGDID:S000000628, Chr III from 179520-186023, Genome Release 64-2-1, Verified ORF, "Protein homologous to Chediak-Higashi syndrome and Beige proteins; both of which are implicated in disease syndromes in human and mouse, respectively, due to defective lysosomal trafficking; mutant phenotype and genetic interactions suggest a role in protein sorting"	7	-	-	-	-	-	-	-	-	-	6	-	-	2
	YLR422W	YLR422W SGDID:S000004414, Chr XII from 965897-971695, Genome Release 64-2-1, Uncharacterized ORF, "Protein of unknown function with similarity to human DOCK proteins; interacts with Ino4p; green fluorescent protein (GFP)-fusion protein localizes to the cytoplasm, YLR422W is not an essential protein; DOCK proteins act as guanine nucleotide exchange factors"	7	-	-	-	-	-	-	-	-	-	6	-	-	2
	SKI2	SKI2 SGDID:S000004390, Chr XII from 919019-915156, Genome Release 64-2-1, reverse complement, Verified ORF, "Ski complex component and putative RNA helicase; mediates 3'-5' RNA degradation by the cytoplasmic exosome; null mutants have superkiller phenotype of increased viral dsRNAs and are synthetic lethal with mutations in 5'-3' mRNA decay; mutations in the human ortholog, SKIV2L, causes Syndrom…	6	-	-	-	-	-	-	-	-	-	7	-	-	2
	LST4	LST4 SGDID:S000001659, Chr XI from 117986-115500, Genome Release 64-2-1, reverse complement, Verified ORF, "Protein possibly involved in a post-Golgi secretory pathway; required for the transport of nitrogen-regulated amino acid permease Gap1p from the Golgi to the cell surface"	6	-	-	6	-	-	-	-	-	-	-	-	-	2
	DBF20	DBF20 SGDID:S000006315, Chr XVI from 747306-749000, Genome Release 64-2-1, Verified ORF, "Ser/Thr kinase involved in late nuclear division; one of the mitotic exit network (MEN) proteins; necessary for the execution of cytokinesis; also plays a role in regulating the stability of SWI5 and CLB2 mRNAs; DBF20 has a paralog, DBF2, that arose from the whole genome duplication"	6	-	-	-	-	-	6	-	-	-	-	-	-	2
	SSE2	SSE2 SGDID:S000000373, Chr II from 575996-573915, Genome Release 64-2-1, reverse complement, Verified ORF, "Member of the heat shock protein 70 (HSP70) family; may be involved in protein folding; localized to the cytoplasm; SSE2 has a paralog, SSE1, that arose from the whole genome duplication"	-	14	-	-	-	-	8	-	-	-	-	-	-	2
	RIF1	RIF1 SGDID:S000000479, Chr II from 757106-751356, Genome Release 64-2-1, reverse complement, Verified ORF, "Protein that binds to the Rap1p C-terminus; acts synergistically with Rif2p to help control telomere length and establish telomeric silencing; contributes to resection of DNA double strand breaks (DSBs); deletion results in telomere elongation"	-	-	10	-	-	-	-	-	9	-	-	-	-	2
	EFR3	EFR3 SGDID:S000004825, Chr XIII from 693043-690695, Genome Release 64-2-1, reverse complement, Verified ORF, "Protein required for Stt4-containing PI kinase complex localization; required for Stt4-containing phosphoinositide (PI) kinase patch assembly at the plasma membrane; recruited to the plasma membrane via a conserved basic patch near its N-terminus; exhibits synthetic lethal genetic interac…	-	-	9	-	-	-	-	-	-	-	11	-	-	2
	YAK1	YAK1 SGDID:S000003677, Chr X from 150390-147967, Genome Release 64-2-1, reverse complement, Verified ORF, "Serine-threonine protein kinase; component of a glucose-sensing system that inhibits growth in response to glucose availability; upon nutrient deprivation Yak1p phosphorylates Pop2p to regulate mRNA deadenylation, the co-repressor Crf1p to inhibit transcription of ribosomal genes, and the st…	-	-	10	8	-	-	-	-	-	-	-	-	-	2
	SIT4	SIT4 SGDID:S000002205, Chr IV from 369771-370706, Genome Release 64-2-1, Verified ORF, "Type 2A-related serine-threonine phosphatase; functions in the G1/S transition of the mitotic cycle; regulator of COPII coat dephosphorylation; required for ER to Golgi traffic; interacts with Hrr25p kinase; cytoplasmic and nuclear protein that modulates functions mediated by Pkc1p including cell wall and acti…	-	-	7	7	-	-	-	-	-	-	-	-	-	2
	GSC2	GSC2 SGDID:S000003264, Chr VII from 548264-553951, Genome Release 64-2-1, Verified ORF, "Catalytic subunit of 1,3-beta-glucan synthase; involved in formation of the inner layer of the spore wall; activity positively regulated by Rho1p and negatively by Smk1p; GSC2 has a paralog, FKS1, that arose from the whole genome duplication"	-	-	-	47	-	-	-	-	-	-	44	-	-	2
	ADP1	ADP1 SGDID:S000000604, Chr III from 136873-133724, Genome Release 64-2-1, reverse complement, Verified ORF, "Putative ATP-dependent permease of the ABC transporter family"	-	-	-	14	-	15	-	-	-	-	-	-	-	2
	SEH1	SEH1 SGDID:S000003068, Chr VII from 313234-314283, Genome Release 64-2-1, Verified ORF, "Component of two distinct complexes; subunit of the Nup84 nuclear pore sub-complex (NPC) and the Seh1-associated (SEA) complex; the the NUP84 subcomplex contributes to nucleocytoplasmic transport and NPC biogenesis; the SEA complex is a coatamer-related complex that associates dynamically with the vacuole; ho…	-	-	-	13	-	-	-	-	-	-	12	-	-	2
	PFF1	PFF1 SGDID:S000000278, Chr II from 386286-389216, Genome Release 64-2-1, Verified ORF, "Multi-spanning vacuolar membrane protease; glycosylated transmembrane protein bearing homology to the M28 family of metalloproteases; has a lumenal-facing protease domain; proposed role in vacuole physiology"	-	-	-	11	-	13	-	-	-	-	-	-	-	2
	PEX8	PEX8 SGDID:S000003309, Chr VII from 639513-637744, Genome Release 64-2-1, reverse complement, Verified ORF, "Intraperoxisomal organizer of the peroxisomal import machinery; organizes the formation of the importomer complex, bridging the docking complex with the RING finger complex; tightly associated with the lumenal face of the peroxisomal membrane; essential for peroxisome biogenesis; binds PTS…	-	-	-	11	-	-	10	-	-	-	-	-	-	2
	APL3	APL3 SGDID:S000000133, Chr II from 147209-150286, Genome Release 64-2-1, Verified ORF, "Alpha-adaptin; large subunit of the clathrin associated protein complex (AP-2); involved in vesicle mediated transport"	-	-	-	8	-	-	-	-	-	-	12	-	-	2
	RPB3	RPB3 SGDID:S000001283, Chr IX from 312905-313861, Genome Release 64-2-1, Verified ORF, "RNA polymerase II third largest subunit B44; part of central core; similar to prokaryotic alpha subunit"	-	-	-	8	-	-	-	-	-	10	-	-	-	2
	VAM3	VAM3 SGDID:S000005632, Chr XV from 519121-519972, Genome Release 64-2-1, Verified ORF, "Syntaxin-like vacuolar t-SNARE; functions with Vam7p in vacuolar protein trafficking; mediates docking/fusion of late transport intermediates with the vacuole; has an acidic di-leucine sorting signal and C-terminal transmembrane region"	-	-	-	8	-	-	6	-	-	-	-	-	-	2
	YOL098C	YOL098C SGDID:S000005458, Chr XV from 135838-132725, Genome Release 64-2-1, reverse complement, Uncharacterized ORF, "Putative metalloprotease"	-	-	-	8	-	-	-	-	-	-	-	-	8	2
	NYV1	NYV1 SGDID:S000004083, Chr XII from 327258-326513,327415-327400, Genome Release 64-2-1, reverse complement, Verified ORF, "v-SNARE component of the vacuolar SNARE complex; involved in vesicle fusion; inhibits ATP-dependent Ca(2+) transport activity of Pmc1p in the vacuolar membrane"	-	-	-	7	-	-	-	-	-	-	6	-	-	2
	RPM2	RPM2 SGDID:S000004556, Chr XIII from 90731-87123, Genome Release 64-2-1, reverse complement, Verified ORF, "Protein subunit of mitochondrial RNase P; has roles in nuclear transcription, cytoplasmic and mitochondrial RNA processing, and mitochondrial translation; distributed to mitochondria, cytoplasmic processing bodies, and the nucleus"	-	-	-	7	-	-	-	-	-	7	-	-	-	2
	YGL114W	YGL114W SGDID:S000003082, Chr VII from 293460-295637, Genome Release 64-2-1, Uncharacterized ORF, "Putative protein of unknown function; predicted member of the oligopeptide transporter (OPT) family of membrane transporters"	-	-	-	6	-	-	-	6	-	-	-	-	-	2
	SER3	SER3 SGDID:S000000883, Chr V from 322686-324095, Genome Release 64-2-1, Verified ORF, "3-phosphoglycerate dehydrogenase; catalyzes the first step in serine and glycine biosynthesis; SER3 has a paralog, SER33, that arose from the whole genome duplication"	-	-	-	-	30	31	-	-	-	-	-	-	-	2
	PPH22	PPH22 SGDID:S000002347, Chr IV from 124998-123865, Genome Release 64-2-1, reverse complement, Verified ORF, "Catalytic subunit of protein phosphatase 2A (PP2A); functionally redundant with Pph21p; methylated at C terminus; forms alternate complexes with several regulatory subunits; involved in signal transduction and regulation of mitosis; protein abundance increases in response to DNA replicatio…	-	-	-	-	16	9	-	-	-	-	-	-	-	2
	SEC18	SEC18 SGDID:S000000284, Chr II from 400890-398614, Genome Release 64-2-1, reverse complement, Verified ORF, "AAA ATPase and SNARE disassembly chaperone; required for vesicular transport between ER and Golgi, the 'priming' step in homotypic vacuole fusion, autophagy, and protein secretion; releases Sec17p from SNAP complexes; has similarity to mammalian N-ethylmaleimide-sensitive factor (NSF)"	-	-	-	-	11	-	-	-	-	-	-	-	16	2
	RPS0A	RPS0A SGDID:S000003446, Chr VII from 920575-920664,921120-921788, Genome Release 64-2-1, Verified ORF, "Ribosomal 40S subunit protein S0A; required for maturation of 18S rRNA along with Rps0Bp; deletion of either RPS0 gene reduces growth rate, deletion of both genes is lethal; homologous to human ribosomal protein SA and bacterial S2; RPS0A has a paralog, RPS0B, that arose from the whole genome d…	-	-	-	-	14	11	-	-	-	-	-	-	-	2
	APE1	APE1 SGDID:S000001586, Chr XI from 247682-246138, Genome Release 64-2-1, reverse complement, Verified ORF, "Vacuolar aminopeptidase yscI; zinc metalloproteinase that belongs to the peptidase family M18; often used as a marker protein in studies of autophagy and cytosol to vacuole targeting (CVT) pathway; protein increases in abundance and relative distribution to cytoplasmic foci increases upon D…	-	-	-	-	9	15	-	-	-	-	-	-	-	2
	SIN3	SIN3 SGDID:S000005364, Chr XV from 316938-321548, Genome Release 64-2-1, Verified ORF, "Component of both the Rpd3S and Rpd3L histone deacetylase complexes; involved in transcriptional repression and activation of diverse processes, including mating-type switching and meiosis; involved in the maintenance of chromosomal integrity"	-	-	-	-	8	-	-	-	-	-	-	-	10	2
	SDA1	SDA1 SGDID:S000003477, Chr VII from 982068-979765, Genome Release 64-2-1, reverse complement, Verified ORF, "Protein required for actin organization and passage through Start; highly conserved nuclear protein; required for actin cytoskeleton organization; plays a critical role in G1 events; binds Nap1p; involved in 60S ribosome biogenesis"	-	-	-	-	8	-	-	-	13	-	-	-	-	2
	NUP60	NUP60 SGDID:S000000063, Chr I from 152257-153876, Genome Release 64-2-1, Verified ORF, "FG-nucleoporin component of central core of the nuclear pore complex; contributes directly to nucleocytoplasmic transport and maintenance of the nuclear pore complex (NPC) permeability barrier and is involved in gene tethering at the nuclear periphery; relocalizes to the cytosol in response to hypoxia; both NU…	-	-	-	-	8	-	-	-	-	-	-	7	-	2
	ECM16	ECM16 SGDID:S000004735, Chr XIII from 523696-527499, Genome Release 64-2-1, Verified ORF, "Essential DEAH-box ATP-dependent RNA helicase specific to U3 snoRNP; predominantly nucleolar in distribution; required for 18S rRNA synthesis"	-	-	-	-	7	-	-	-	-	-	12	-	-	2
	FAT1	FAT1 SGDID:S000000245, Chr II from 318266-320275, Genome Release 64-2-1, Verified ORF, "Very long chain fatty acyl-CoA synthetase and fatty acid transporter; activates imported fatty acids with a preference for very long lengths (C20-C26); has a separate function in the transport of long chain fatty acids"	-	-	-	-	7	-	7	-	-	-	-	-	-	2
	GUA1	GUA1 SGDID:S000004830, Chr XIII from 701790-703367, Genome Release 64-2-1, Verified ORF, "GMP synthase; highly conserved enzyme that catalyzes the second step in the biosynthesis of GMP from inosine 5'-phosphate (IMP); transcription is not subject to regulation by guanine but is negatively regulated by nutrient starvation; reduction-of-function mutation gua1-G388D causes changes in cellular guani…	-	-	-	-	6	-	-	-	-	-	19	-	-	2
	AVT3	AVT3 SGDID:S000001629, Chr XI from 171783-173861, Genome Release 64-2-1, Verified ORF, "Vacuolar transporter; exports large neutral amino acids from the vacuole; member of a family of seven S. cerevisiae genes (AVT1-7) related to vesicular GABA-glycine transporters"	-	-	-	-	6	8	-	-	-	-	-	-	-	2
	EPS1	EPS1 SGDID:S000001267, Chr IX from 345692-347797, Genome Release 64-2-1, Verified ORF, "ER protein with chaperone and co-chaperone activity; involved in retention of resident ER proteins; has a role in recognizing proteins targeted for ER-associated degradation (ERAD), member of the protein disulfide isomerase family"	-	-	-	-	-	17	-	-	-	8	-	-	-	2
	CHS3	CHS3 SGDID:S000000227, Chr II from 287925-284428, Genome Release 64-2-1, reverse complement, Verified ORF, "Chitin synthase III; catalyzes the transfer of N-acetylglucosamine (GlcNAc) to chitin; required for synthesis of the majority of cell wall chitin, the chitin ring during bud emergence, and spore wall chitosan; contains overlapping di-leucine and di-acidic signals that mediate, respectively,…	-	-	-	-	-	12	-	-	-	7	-	-	-	2
	LCB4	LCB4 SGDID:S000005697, Chr XV from 653884-652010, Genome Release 64-2-1, reverse complement, Verified ORF, "Sphingoid long-chain base kinase; responsible for synthesis of long-chain base phosphates, which function as signaling molecules, regulates synthesis of ceramide from exogenous long-chain bases, localizes to the Golgi and late endosomes; LCB4 has a paralog, LCB5, that arose from the whole g…	-	-	-	-	-	10	-	-	-	-	-	-	12	2
	MAM3	MAM3 SGDID:S000005421, Chr XV from 216137-214017, Genome Release 64-2-1, reverse complement, Verified ORF, "Protein required for normal mitochondrial morphology; has similarity to hemolysins"	-	-	-	-	-	12	-	-	-	-	-	8	-	2
	PMT1	PMT1 SGDID:S000002253, Chr IV from 287059-289512, Genome Release 64-2-1, Verified ORF, "Protein O-mannosyltransferase of the ER membrane; transfers mannose from dolichyl phosphate-D-mannose to protein serine and threonine residues; 1 of 7 related proteins involved in O-glycosylation which is essential for cell wall rigidity; involved in ER quality control; amino terminus faces cytoplasm, carboxyl…	-	-	-	-	-	10	-	-	-	-	-	-	10	2
	SEY1	SEY1 SGDID:S000005691, Chr XV from 644566-646896, Genome Release 64-2-1, Verified ORF, "Dynamin-like GTPase that mediates homotypic ER fusion; has a role in ER morphology; interacts physically and genetically with Yop1p and Rtn1p; functional ortholog of the human atlastin ATL1, defects in which cause a form of the human disease hereditary spastic paraplegia; homolog of Arabidopsis RHD3"	-	-	-	-	-	8	-	-	-	7	-	-	-	2
	SSA3	SSA3 SGDID:S000000171, Chr II from 86448-84499, Genome Release 64-2-1, reverse complement, Verified ORF, "ATPase involved in protein folding and the response to stress; plays a role in SRP-dependent cotranslational protein-membrane targeting and translocation; member of the heat shock protein 70 (HSP70) family; localized to the cytoplasm; SSA3 has a paralog, SSA4, that arose from the whole genome…	-	-	-	-	-	-	28	-	-	-	-	23	-	2
	GFA1	GFA1 SGDID:S000001587, Chr XI from 245373-243220, Genome Release 64-2-1, reverse complement, Verified ORF, "Glutamine-fructose-6-phosphate amidotransferase; catalyzes the formation of glucosamine-6-P and glutamate from fructose-6-P and glutamine in the first step of chitin biosynthesis; GFA1 has a paralogous region, comprising ORFs YMR084W-YMR085W, that arose from the whole genome duplication"	-	-	-	-	-	-	16	-	-	-	-	-	37	2
	ENT5	ENT5 SGDID:S000002560, Chr IV from 767971-766736, Genome Release 64-2-1, reverse complement, Verified ORF, "Protein containing an N-terminal epsin-like domain; involved in clathrin recruitment and traffic between the Golgi and endosomes; associates with the clathrin adaptor Gga2p, clathrin adaptor complex AP-1, and clathrin"	-	-	-	-	-	-	11	-	8	-	-	-	-	2
	HSP78	HSP78 SGDID:S000002666, Chr IV from 974243-971808, Genome Release 64-2-1, reverse complement, Verified ORF, "Oligomeric mitochondrial matrix chaperone; cooperates with Ssc1p in mitochondrial thermotolerance after heat shock; able to prevent the aggregation of misfolded proteins as well as resolubilize protein aggregates"	-	-	-	-	-	-	11	-	-	-	22	-	-	2
	NOC2	NOC2 SGDID:S000005732, Chr XV from 727512-729644, Genome Release 64-2-1, Verified ORF, "Protein involved in ribosome biogenesis; forms a nucleolar complex with Mak21p that binds to 90S and 66S pre-ribosomes; forms a nuclear complex with Noc3p that binds to 66S pre-ribosomes; both complexes mediate intranuclear transport of ribosomal precursors; acts as part of a Mak21p-Noc2p-Rrp5p module that ass…	-	-	-	-	-	-	10	-	-	-	-	-	19	2
	RPL21B	RPL21B SGDID:S000006000, Chr XVI from 406636-406646,407068-407539, Genome Release 64-2-1, Verified ORF, "Ribosomal 60S subunit protein L21B; homologous to mammalian ribosomal protein L21, no bacterial homolog; RPL21B has a paralog, RPL21A, that arose from the whole genome duplication"	-	-	-	-	-	-	11	-	8	-	-	-	-	2
	RIX1	RIX1 SGDID:S000001240, Chr VIII from 493896-496187, Genome Release 64-2-1, Verified ORF, "Component of the Rix1 complex and possibly pre-replicative complexes; required for processing of ITS2 sequences from 35S pre-rRNA; component of the pre-60S ribosomal particle with the dynein-related AAA-type ATPase Mdn1p; required for pre-replicative complex (pre-RC) formation and maintenance during DNA repl…	-	-	-	-	-	-	8	-	-	-	13	-	-	2
	SKT5	SKT5 SGDID:S000000157, Chr II from 107406-105316, Genome Release 64-2-1, reverse complement, Verified ORF, "Activator of Chs3p (chitin synthase III) during vegetative growth; recruits Chs3p to the bud neck via interaction with Bni4p; SKT5 has a paralog, SHC1, that arose from the whole genome duplication"	-	-	-	-	-	-	9	-	-	-	8	-	-	2
	GCD2	GCD2 SGDID:S000003315, Chr VII from 646815-644860, Genome Release 64-2-1, reverse complement, Verified ORF, "Delta subunit of the translation initiation factor eIF2B; the guanine-nucleotide exchange factor for eIF2; activity subsequently regulated by phosphorylated eIF2; first identified as a negative regulator of GCN4 expression"	-	-	-	-	-	-	8	-	-	-	13	-	-	2
	VTH1	VTH1 SGDID:S000001435, Chr IX from 11492-16141, Genome Release 64-2-1, Verified ORF, "Putative membrane glycoprotein; has strong similarity to Vth2p and Pep1p/Vps10p; may be involved in vacuolar protein sorting"	-	-	-	-	-	-	8	12	-	-	-	-	-	2
	IRA2	IRA2 SGDID:S000005441, Chr XV from 171070-180309, Genome Release 64-2-1, Verified ORF, "GTPase-activating protein; negatively regulates RAS by converting it from the GTP- to the GDP-bound inactive form, required for reducing cAMP levels under nutrient limiting conditions; similar to human neurofibromin; IRA2 has a paralog, IRA1, that arose from the whole genome duplication"	-	-	-	-	-	-	8	-	-	-	10	-	-	2
	YPL245W	YPL245W SGDID:S000006166, Chr XVI from 85586-86950, Genome Release 64-2-1, Uncharacterized ORF, "Putative protein of unknown function; green fluorescent protein (GFP)-fusion protein localizes to both the nucleus and the cytoplasm"	-	-	-	-	-	-	7	-	-	9	-	-	-	2
	VMA7	VMA7 SGDID:S000003252, Chr VII from 527329-526973, Genome Release 64-2-1, reverse complement, Verified ORF, "Subunit F of the V1 peripheral membrane domain of V-ATPase; part of the electrogenic proton pump found throughout the endomembrane system; required for the V1 domain to assemble onto the vacuolar membrane; the V1 peripheral membrane domain of vacuolar H+-ATPase (V-ATPase) has eight subunit…	-	-	-	-	-	-	7	-	-	6	-	-	-	2
	FUS3	FUS3 SGDID:S000000112, Chr II from 192451-193512, Genome Release 64-2-1, Verified ORF, "Mitogen-activated serine/threonine protein kinase involved in mating; phosphoactivated by Ste7p; substrates include Ste12p, Far1p, Bni1p, Sst2p; inhibits invasive growth during mating by phosphorylating Tec1p, promoting its; inhibits recruitment of Ste5p, Cdc42p-mediated asymmetry and mating morphogenesis"	-	-	-	-	-	-	6	8	-	-	-	-	-	2
	RMD9	RMD9 SGDID:S000003075, Chr VII from 306273-304333, Genome Release 64-2-1, reverse complement, Verified ORF, "Mitochondrial protein required for respiratory growth; mutant phenotype and genetic interactions suggest a role in delivering mt mRNAs to ribosomes; located on matrix face of the inner membrane and loosely associated with mitoribosomes; RMD9 has a paralog, YBR238C, that arose from the whol…	-	-	-	-	-	-	6	-	-	8	-	-	-	2
	RPL7B	RPL7B SGDID:S000006119, Chr XVI from 173152-173162,173572-173665,174073-174702, Genome Release 64-2-1, Verified ORF, "Ribosomal 60S subunit protein L7B; required for processing of 27SA3 pre-rRNA to 27SB pre-rRNA during assembly of large ribosomal subunit; depletion leads to a turnover of pre-rRNA; contains a conserved C-terminal Nucleic acid Binding Domain (NDB2); binds to Domain II of 25S and 5.…	-	-	-	-	-	-	-	24	-	32	-	-	-	2
	APM3	APM3 SGDID:S000000492, Chr II from 779463-778012, Genome Release 64-2-1, reverse complement, Verified ORF, "Mu3-like subunit of the clathrin associated protein complex (AP-3); functions in transport of alkaline phosphatase to the vacuole via the alternate pathway"	-	-	-	-	-	-	-	10	-	-	-	9	-	2
	RMT2	RMT2 SGDID:S000002873, Chr IV from 1394574-1393336, Genome Release 64-2-1, reverse complement, Verified ORF, "Arginine N5 methyltransferase; methylates ribosomal protein Rpl12 (L12) on Arg67; relative distribution to the nucleus increases upon DNA replication stress"	-	-	-	-	-	-	-	10	-	-	15	-	-	2
	HOM6	HOM6 SGDID:S000003900, Chr X from 690524-689445, Genome Release 64-2-1, reverse complement, Verified ORF, "Homoserine dehydrogenase (L-homoserine:NADP oxidoreductase); dimeric enzyme that catalyzes the third step in the common pathway for methionine and threonine biosynthesis; enzyme has nucleotide-binding, dimerization and catalytic regions"	-	-	-	-	-	-	-	9	-	-	11	-	-	2
	BEM1	BEM1 SGDID:S000000404, Chr II from 620872-622527, Genome Release 64-2-1, Verified ORF, "Protein containing SH3-domains; involved in establishing cell polarity and morphogenesis; functions as a scaffold protein for complexes that include Cdc24p, Ste5p, Ste20p, and Rsr1p"	-	-	-	-	-	-	-	9	7	-	-	-	-	2
	RPL26B	RPL26B SGDID:S000003266, Chr VII from 555812-555830,556308-556672, Genome Release 64-2-1, Verified ORF, "Ribosomal 60S subunit protein L26B; binds to 5.8S rRNA; non-essential even when paralog is also deleted; deletion has minimal affections on ribosome biosynthesis; homologous to mammalian ribosomal protein L26 and bacterial L24; RPL26B has a paralog, RPL26A, that arose from the whole genome dup…	-	-	-	-	-	-	-	8	8	-	-	-	-	2
	DLD3	DLD3 SGDID:S000000797, Chr V from 16355-17845, Genome Release 64-2-1, Verified ORF, "D-lactate dehydrogenase; part of the retrograde regulon which consists of genes whose expression is stimulated by damage to mitochondria and reduced in cells grown with glutamate as the sole nitrogen source, located in the cytoplasm"	-	-	-	-	-	-	-	-	13	17	-	-	-	2
	NUP188	NUP188 SGDID:S000004571, Chr XIII from 67549-62582, Genome Release 64-2-1, reverse complement, Verified ORF, "Subunit of the inner ring of the nuclear pore complex (NPC); contributes to NPC organization and nucleocytoplasmic transport; homologous to human NUP188"	-	-	-	-	-	-	-	-	14	-	-	-	13	2
	UTP13	UTP13 SGDID:S000004212, Chr XII from 581771-579318, Genome Release 64-2-1, reverse complement, Verified ORF, "Nucleolar protein; component of the small subunit (SSU) processome containing the U3 snoRNA that is involved in processing of pre-18S rRNA"	-	-	-	-	-	-	-	-	11	-	-	-	9	2
	RNQ1	RNQ1 SGDID:S000000533, Chr III from 70150-71367, Genome Release 64-2-1, Verified ORF, "[PIN(+)] prion; an infectious protein conformation that is generally an ordered protein aggregate"	-	-	-	-	-	-	-	-	14	-	-	11	-	2
	PGC1	PGC1 SGDID:S000006127, Chr XVI from 163597-162632, Genome Release 64-2-1, reverse complement, Verified ORF, "Phosphatidyl Glycerol phospholipase C; regulates the phosphatidylglycerol (PG) content via a phospholipase C-type degradation mechanism; contains glycerophosphodiester phosphodiesterase motifs"	-	-	-	-	-	-	-	-	9	7	-	-	-	2
	MOB1	MOB1 SGDID:S000001368, Chr IX from 166415-166434,166520-167444, Genome Release 64-2-1, Verified ORF, "Component of the mitotic exit network; associates with and is required for the activation and Cdc15p-dependent phosphorylation of the Dbf2p kinase; required for cytokinesis and cell separation; component of the CCR4 transcriptional complex; relocalizes from cytoplasm to the nuclear periphery upon…	-	-	-	-	-	-	-	-	9	-	-	7	-	2
	GCN3	GCN3 SGDID:S000001734, Chr XI from 489655-488738, Genome Release 64-2-1, reverse complement, Verified ORF, "Alpha subunit of translation initiation factor eIF2B; guanine-nucleotide exchange factor for eIF2; activity subsequently regulated by phosphorylated eIF2; positive regulator of GCN4 expression; assembles into filaments with Gcd2p, Gcd6p, Gcd7p, and Sui2p as cells approach stationary phase a…	-	-	-	-	-	-	-	-	9	-	12	-	-	2
	ALG9	ALG9 SGDID:S000005163, Chr XIV from 237663-235996, Genome Release 64-2-1, reverse complement, Verified ORF, "Mannosyltransferase, involved in N-linked glycosylation; catalyzes both the transfer of seventh mannose residue on B-arm and ninth mannose residue on the C-arm from Dol-P-Man to lipid-linked oligosaccharides; mutation of the human ortholog causes type 1 congenital disorders of glycosylatio…	-	-	-	-	-	-	-	-	9	-	6	-	-	2
	RPC34	RPC34 SGDID:S000005286, Chr XIV from 635297-634344, Genome Release 64-2-1, reverse complement, Verified ORF, "RNA polymerase III subunit C34; interacts with TFIIIB70 and is a key determinant in pol III recruitment by the preinitiation complex"	-	-	-	-	-	-	-	-	7	9	-	-	-	2
	VPS54	VPS54 SGDID:S000002434, Chr IV from 497318-494649, Genome Release 64-2-1, reverse complement, Verified ORF, "Component of the GARP (Golgi-associated retrograde protein) complex; GARP is required for the recycling of proteins from endosomes to the late Golgi, and for mitosis after DNA damage induced checkpoint arrest; potentially phosphorylated by Cdc28p; members of the GARP complex are Vps51p-Vps…	-	-	-	-	-	-	-	-	7	-	8	-	-	2
	SEC7	SEC7 SGDID:S000002577, Chr IV from 802222-796193, Genome Release 64-2-1, reverse complement, Verified ORF, "Guanine nucleotide exchange factor (GEF) for ADP ribosylation factors; involved in proliferation of the Golgi, intra-Golgi transport and ER-to-Golgi transport; found in the cytoplasm and on Golgi-associated coated vesicles"	-	-	-	-	-	-	-	-	-	46	44	-	-	2
	TDH3	TDH3 SGDID:S000003424, Chr VII from 883810-882812, Genome Release 64-2-1, reverse complement, Verified ORF, "Glyceraldehyde-3-phosphate dehydrogenase (GAPDH), isozyme 3; involved in glycolysis and gluconeogenesis; tetramer that catalyzes the reaction of glyceraldehyde-3-phosphate to 1,3 bis-phosphoglycerate; detected in the cytoplasm and cell wall; GAPDH-derived antimicrobial peptides secreted by…	-	-	-	-	-	-	-	-	-	93	116	-	-	2
	TDH2	TDH2 SGDID:S000003769, Chr X from 454681-453683, Genome Release 64-2-1, reverse complement, Verified ORF, "Glyceraldehyde-3-phosphate dehydrogenase (GAPDH), isozyme 2; involved in glycolysis and gluconeogenesis; tetramer that catalyzes reaction of glyceraldehyde-3-phosphate to 1,3 bis-phosphoglycerate; detected in cytoplasm and cell wall; protein abundance increases in response to DNA replication…	-	-	-	-	-	-	-	-	-	69	80	-	-	2
	RPB2	RPB2 SGDID:S000005677, Chr XV from 616671-612997, Genome Release 64-2-1, reverse complement, Verified ORF, "RNA polymerase II second largest subunit B150; part of central core; similar to bacterial beta subunit"	-	-	-	-	-	-	-	-	-	28	24	-	-	2
	SEC3	SEC3 SGDID:S000000810, Chr V from 171818-167808, Genome Release 64-2-1, reverse complement, Verified ORF, "Subunit of the exocyst complex; the exocyst mediates polarized targeting and tethering of post-Golgi secretory vesicles to sites of exocytosis prior to SNARE-mediated fusion; PtdIns[4,5]P2-binding protein that localizes to exocytic sites in a Rho1p-dependent, actin-independent manner, target…	-	-	-	-	-	-	-	-	-	16	-	-	10	2
	CLA4	CLA4 SGDID:S000005242, Chr XIV from 68915-71443, Genome Release 64-2-1, Verified ORF, "Cdc42p-activated signal transducing kinase; member of the PAK (p21-activated kinase) family, along with Ste20p and Skm1p; involved in septin ring assembly, vacuole inheritance, cytokinesis, sterol uptake regulation; phosphorylates Cdc3p and Cdc10p; CLA4 has a paralog, SKM1, that arose from the whole genome dupl…	-	-	-	-	-	-	-	-	-	13	15	-	-	2
	RPT4	RPT4 SGDID:S000005785, Chr XV from 813708-812395, Genome Release 64-2-1, reverse complement, Verified ORF, "ATPase of the 19S regulatory particle of the 26S proteasome; one of six ATPases of the regulatory particle; involved in degradation of ubiquitinated substrates; contributes preferentially to ERAD; required for spindle pole body duplication; mainly nuclear localization"	-	-	-	-	-	-	-	-	-	16	16	-	-	2
	MYO3	MYO3 SGDID:S000001612, Chr XI from 200167-196349, Genome Release 64-2-1, reverse complement, Verified ORF, "One of two type I myosins; localizes to actin cortical patches; deletion of MYO3 has little effect on growth, but myo3 myo5 double deletion causes severe defects in growth and actin cytoskeleton organization; MYO3 has a paralog, MYO5, that arose from the whole genome duplication"	-	-	-	-	-	-	-	-	-	15	-	-	11	2
	BRO1	BRO1 SGDID:S000006005, Chr XVI from 394038-396572, Genome Release 64-2-1, Verified ORF, "Cytoplasmic class E vacuolar protein sorting (VPS) factor; coordinates deubiquitination in the multivesicular body (MVB) pathway by recruiting Doa4p to endosomes"	-	-	-	-	-	-	-	-	-	17	-	20	-	2
	CDC24	CDC24 SGDID:S000000039, Chr I from 62840-65404, Genome Release 64-2-1, Verified ORF, "Guanine nucleotide exchange factor for Cdc42p; also known as a GEF or GDP-release factor; required for polarity establishment and maintenance, and mutants have morphological defects in bud formation and shmooing; relocalizes from nucleus to cytoplasm upon DNA replication stress"	-	-	-	-	-	-	-	-	-	11	-	-	9	2
	AFG2	AFG2 SGDID:S000004389, Chr XII from 914892-912550, Genome Release 64-2-1, reverse complement, Verified ORF, "ATPase of the CDC48/PAS1/SEC18 (AAA) family, forms a hexameric complex; is essential for pre-60S maturation and release of several preribosome maturation factors; releases Rlp24p from purified pre-60S particles in vitro; target of the ribosomal biosynthesis inhibitor diazaborine; may be in…	-	-	-	-	-	-	-	-	-	13	14	-	-	2
	YPR089W	YPR089W SGDID:S000006293, Chr XVI from 713275-715941, Genome Release 64-2-1, Uncharacterized ORF, "Protein of unknown function; exhibits genetic interaction with ERG11 and protein-protein interaction with Hsp82p"	-	-	-	-	-	-	-	-	-	12	-	9	-	2
	SMC2	SMC2 SGDID:S000001927, Chr VI from 220106-216594, Genome Release 64-2-1, reverse complement, Verified ORF, "Subunit of the condensin complex; condensin reorganizes chromosomes during both mitosis and meiosis; essential SMC chromosomal ATPase family member that forms a subcomplex with Smc2p that has ATP-hydrolyzing and DNA-binding activity, but other condensin subunits are required for chromatin b…	-	-	-	-	-	-	-	-	-	16	11	-	-	2
	POL1	POL1 SGDID:S000005046, Chr XIV from 430087-434493, Genome Release 64-2-1, Verified ORF, "Catalytic subunit of the DNA polymerase I alpha-primase complex; required for the initiation of DNA replication during mitotic DNA synthesis and premeiotic DNA synthesis"	-	-	-	-	-	-	-	-	-	14	11	-	-	2
	YVH1	YVH1 SGDID:S000001465, Chr IX from 405967-404873, Genome Release 64-2-1, reverse complement, Verified ORF, "Protein phosphatase; involved in vegetative growth at low temperatures, sporulation, and glycogen accumulation; mutants are defective in 60S ribosome assembly; member of the dual-specificity family of protein phosphatases"	-	-	-	-	-	-	-	-	-	12	-	-	10	2
	PAM1	PAM1 SGDID:S000002659, Chr IV from 960614-963106, Genome Release 64-2-1, Verified ORF, "Essential protein of unknown function; exhibits variable expression during colony morphogenesis; overexpression permits survival without protein phosphatase 2A, inhibits growth, and induces a filamentous phenotype; PAM1 has a paralog, SVL3, that arose from the whole genome duplication"	-	-	-	-	-	-	-	-	-	13	-	12	-	2
	TRS120	TRS120 SGDID:S000002815, Chr IV from 1287938-1284069, Genome Release 64-2-1, reverse complement, Verified ORF, "Component of transport protein particle (TRAPP) complex II; TRAPPII is a multimeric guanine nucleotide-exchange factor for the GTPase Ypt1p, regulating intra-Golgi and endosome-Golgi traffic"	-	-	-	-	-	-	-	-	-	14	-	-	7	2
	YJR003C	YJR003C SGDID:S000003763, Chr X from 442553-440994, Genome Release 64-2-1, reverse complement, Uncharacterized ORF, "Putative protein of unknown function; detected in highly purified mitochondria in high-throughput studies; predicted to be involved in ribosome biogenesis"	-	-	-	-	-	-	-	-	-	11	-	8	-	2
	SUM1	SUM1 SGDID:S000002718, Chr IV from 1084316-1081128, Genome Release 64-2-1, reverse complement, Verified ORF, "Transcriptional repressor that regulates middle-sporulation genes; required for mitotic repression of middle sporulation-specific genes; also acts as general replication initiation factor; involved in telomere maintenance, chromatin silencing; regulated by pachytene checkpoint"	-	-	-	-	-	-	-	-	-	14	-	7	-	2
	RDH54	RDH54 SGDID:S000000277, Chr II from 383112-385988, Genome Release 64-2-1, Verified ORF, "DNA-dependent ATPase; DNA recombination/repair translocase, supercoils DNA and promotes DNA strand opening; stimulates strand exchange by modifying dsDNA topology; involved in recombinational repair of DNA double-strand breaks (DSBs) during mitosis and meiosis; phosphorylated in Mec1p-, Rad53p-dependent way i…	-	-	-	-	-	-	-	-	-	11	14	-	-	2
	MET5	MET5 SGDID:S000003898, Chr X from 683285-678957, Genome Release 64-2-1, reverse complement, Verified ORF, "Sulfite reductase beta subunit; involved in amino acid biosynthesis, transcription repressed by methionine"	-	-	-	-	-	-	-	-	-	12	-	7	-	2
	APL6	APL6 SGDID:S000003493, Chr VII from 1016750-1014321, Genome Release 64-2-1, reverse complement, Verified ORF, "Beta3-like subunit of the yeast AP-3 complex; functions in transport of alkaline phosphatase to the vacuole via the alternate pathway; exists in both cytosolic and peripherally associated membrane-bound pools"	-	-	-	-	-	-	-	-	-	11	13	-	-	2
	CDC9	CDC9 SGDID:S000002323, Chr IV from 167254-164987, Genome Release 64-2-1, reverse complement, Verified ORF, "DNA ligase found in the nucleus and mitochondria; an essential enzyme that joins Okazaki fragments during DNA replication; also acts in ribonucleotide excision repair, base excision repair, and recombination,"	-	-	-	-	-	-	-	-	-	9	12	-	-	2
	FAA3	FAA3 SGDID:S000001271, Chr IX from 339344-341428, Genome Release 64-2-1, Verified ORF, "Long chain fatty acyl-CoA synthetase; activates imported fatty acids; green fluorescent protein (GFP)-fusion protein localizes to the cell periphery"	-	-	-	-	-	-	-	-	-	13	-	-	16	2
	KIN4	KIN4 SGDID:S000005759, Chr XV from 775846-778248, Genome Release 64-2-1, Verified ORF, "Serine/threonine protein kinase; inhibits the mitotic exit network (MEN) when the spindle position checkpoint is activated; localized asymmetrically to mother cell cortex, spindle pole body and bud neck; KIN4 has a paralog, FRK1, that arose from the whole genome duplication"	-	-	-	-	-	-	-	-	-	10	-	8	-	2
	CUL3	CUL3 SGDID:S000003235, Chr VII from 500132-502366, Genome Release 64-2-1, Verified ORF, "Ubiquitin-protein ligase; forms a complex with Elc1p that polyubiquitylates monoubiquitylated RNA polymerase II to trigger its proteolysis; cullin family member with similarity to Cdc53p and human CUL3"	-	-	-	-	-	-	-	-	-	11	9	-	-	2
	RGR1	RGR1 SGDID:S000004061, Chr XII from 278626-275378, Genome Release 64-2-1, reverse complement, Verified ORF, "Subunit of the RNA polymerase II mediator complex; associates with core polymerase subunits to form the RNA polymerase II holoenzyme; required for glucose repression, HO repression, RME1 repression and sporulation"	-	-	-	-	-	-	-	-	-	11	-	-	8	2
	PBY1	PBY1 SGDID:S000000298, Chr II from 432036-434297, Genome Release 64-2-1, Verified ORF, "Putative tubulin tyrosine ligase associated with P-bodies; forms cytoplasmic foci upon DNA replication stress"	-	-	-	-	-	-	-	-	-	11	-	13	-	2
	EXO70	EXO70 SGDID:S000003621, Chr X from 272827-274698, Genome Release 64-2-1, Verified ORF, "Subunit of the exocyst complex; the exocyst mediates polarized targeting and tethering of post-Golgi secretory vesicles to active sites of exocytosis prior to SNARE-mediated fusion; PtdIns[4,5]P2-binding protein that localizes to exocytic sites in an actin-independent manner, targeting and anchoring the exocys…	-	-	-	-	-	-	-	-	-	8	7	-	-	2
	RCK2	RCK2 SGDID:S000004238, Chr XII from 634252-636084, Genome Release 64-2-1, Verified ORF, "Protein kinase involved in response to oxidative and osmotic stress; identified as suppressor of S. pombe cell cycle checkpoint mutations; similar to CaM (calmodulin) kinases; RCK2 has a paralog, RCK1, that arose from the whole genome duplication"	-	-	-	-	-	-	-	-	-	11	13	-	-	2
	STU1	STU1 SGDID:S000000130, Chr II from 158389-153848, Genome Release 64-2-1, reverse complement, Verified ORF, "Component of the mitotic spindle; binds to interpolar microtubules via its association with beta-tubulin (Tub2p); required for interpolar microtubules to provide an outward force on the spindle poles"	-	-	-	-	-	-	-	-	-	11	10	-	-	2
	TUB4	TUB4 SGDID:S000004202, Chr XII from 566281-564860, Genome Release 64-2-1, reverse complement, Verified ORF, "Gamma-tubulin; involved in nucleating microtubules from both the cytoplasmic and nuclear faces of the spindle pole body; protein abundance increases in response to DNA replication stress"	-	-	-	-	-	-	-	-	-	8	6	-	-	2
	UBX4	UBX4 SGDID:S000004671, Chr XIII from 405573-404323, Genome Release 64-2-1, reverse complement, Verified ORF, "UBX domain-containing protein that interacts with Cdc48p; involved in degradation of polyubiquitinated proteins via the ERAD (ER-associated degradation) pathway; modulates the Cdc48p-Nplp-Ufd1p AAA ATPase complex during its role in delivery of misfolded proteins to the proteasome; protein…	-	-	-	-	-	-	-	-	-	8	9	-	-	2
	SEC39	SEC39 SGDID:S000004432, Chr XII from 1017697-1015568, Genome Release 64-2-1, reverse complement, Verified ORF, "Component of the Dsl1p tethering complex; this complex interacts with ER SNAREs Sec20p and Use1p; proposed to be involved in protein secretion; localizes to the ER and nuclear envelope"	-	-	-	-	-	-	-	-	-	7	11	-	-	2
	POL2	POL2 SGDID:S000005206, Chr XIV from 148212-154880, Genome Release 64-2-1, Verified ORF, "Catalytic subunit of DNA polymerase (II) epsilon; a chromosomal DNA replication polymerase that exhibits processivity and proofreading exonuclease activity; participates in leading-strand synthesis during DNA replication; also involved in DNA synthesis during DNA repair; interacts extensively with Mrc1p"	-	-	-	-	-	-	-	-	-	10	6	-	-	2
	DUF1	DUF1 SGDID:S000005447, Chr XV from 158637-155287, Genome Release 64-2-1, reverse complement, Verified ORF, "Ubiquitin-binding protein of unknown function; contains one WD40 repeat in a beta-propeller fold; green fluorescent protein (GFP)-fusion protein localizes to the cytoplasm; homolog of human WDR48/UAF1, which is involved in regulating the Fanconi anemia pathway; deletion mutant is sensitive …	-	-	-	-	-	-	-	-	-	8	8	-	-	2
	TTI1	TTI1 SGDID:S000001516, Chr XI from 375456-378572, Genome Release 64-2-1, Verified ORF, "Subunit of the ASTRA complex, involved in chromatin remodeling; telomere length regulator involved in the stability or biogenesis of PIKKs such as TORC1; similar to S. pombe Tti1p; detected in highly purified mitochondria in high-throughput studies"	-	-	-	-	-	-	-	-	-	9	7	-	-	2
	EBS1	EBS1 SGDID:S000002614, Chr IV from 862054-864708, Genome Release 64-2-1, Verified ORF, "Protein involved in translation inhibition and nonsense-mediated decay; interacts with cap binding protein Cdc33p and with Nam7p; localizes to P-bodies upon glucose starvation; mRNA abundance regulated by mRNA decay factors; EBS1 has a paralog, EST1, that arose from the whole genome duplication"	-	-	-	-	-	-	-	-	-	9	-	-	6	2
	PPZ2	PPZ2 SGDID:S000002844, Chr IV from 1334821-1336953, Genome Release 64-2-1, Verified ORF, "Serine/threonine protein phosphatase Z, isoform of Ppz1p; involved in regulation of potassium transport, which affects osmotic stability, cell cycle progression, and halotolerance"	-	-	-	-	-	-	-	-	-	7	7	-	-	2
	FSF1	FSF1 SGDID:S000005797, Chr XV from 832042-831059, Genome Release 64-2-1, reverse complement, Uncharacterized ORF, "Putative protein; predicted to be an alpha-isopropylmalate carrier; belongs to the sideroblastic-associated protein family; non-tagged protein is detected in purified mitochondria; likely to play a role in iron homeostasis"	-	-	-	-	-	-	-	-	-	8	-	6	-	2
	NVJ2	NVJ2 SGDID:S000006295, Chr XVI from 718468-716156, Genome Release 64-2-1, reverse complement, Verified ORF, "Lipid-binding ER protein, enriched at nucleus-vacuolar junctions (NVJ); may be involved in sterol metabolism or signaling at the NVJ; contains a synaptotagmin-like-mitochondrial-lipid binding protein (SMP) domain; binds phosphatidylinositols and other lipids in a large-scale study; may int…	-	-	-	-	-	-	-	-	-	7	-	6	-	2
	RCN2	RCN2 SGDID:S000005746, Chr XV from 755328-756125, Genome Release 64-2-1, Verified ORF, "Protein of unknown function; green fluorescent protein (GFP)-fusion protein localizes to the cytoplasm; phosphorylated in response to alpha factor; protein abundance increases in response to DNA replication stress"	-	-	-	-	-	-	-	-	-	7	9	-	-	2
	ALY2	ALY2 SGDID:S000003620, Chr X from 278002-274862, Genome Release 64-2-1, reverse complement, Verified ORF, "Alpha arrestin; controls nutrient-mediated intracellular sorting of permease Gap1p; interacts with AP-1 subunit Apl4p; phosphorylated by Npr1p and also by cyclin-CDK complex Pcl7p-Pho85p; promotes endocytosis of plasma membrane proteins; ALY2 has a paralog, ALY1, that arose from the whole ge…	-	-	-	-	-	-	-	-	-	7	8	-	-	2
	YTA6	YTA6 SGDID:S000005995, Chr XVI from 415763-418027, Genome Release 64-2-1, Verified ORF, "Putative ATPase of the CDC48/PAS1/SEC18 (AAA) family; localized to the cortex of mother cells but not to daughter cells; relocalizes from cytoplasm to plasma membrane foci upon DNA replication stress"	-	-	-	-	-	-	-	-	-	7	12	-	-	2
	SPC97	SPC97 SGDID:S000001215, Chr VIII from 448335-450806, Genome Release 64-2-1, Verified ORF, "Component of the microtubule-nucleating Tub4p (gamma-tubulin) complex; interacts with Spc110p at the spindle pole body (SPB) inner plaque and with Spc72p at the SPB outer plaque"	-	-	-	-	-	-	-	-	-	6	7	-	-	2
	ADE13	ADE13 SGDID:S000004351, Chr XII from 844282-845730, Genome Release 64-2-1, Verified ORF, "Adenylosuccinate lyase; catalyzes two steps in the 'de novo' purine nucleotide biosynthetic pathway; expression is repressed by adenine and activated by Bas1p and Pho2p; mutations in human ortholog ADSL cause adenylosuccinase deficiency"	-	-	-	-	-	-	-	-	-	6	7	-	-	2
	TEF2	TEF2 SGDID:S000000322, Chr II from 477671-479047, Genome Release 64-2-1, Verified ORF, "Translational elongation factor EF-1 alpha; also encoded by TEF1; functions in the binding reaction of aminoacyl-tRNA (AA-tRNA) to ribosomes; TEF2-RFP levels increase during replicative aging; may also have a role in tRNA re-export from the nucleus; TEF2 has a paralog, TEF1, that arose from the whole genome du…	-	-	-	-	-	-	-	-	-	-	258	-	225	2
	SEC16	SEC16 SGDID:S000006006, Chr XVI from 387067-393654, Genome Release 64-2-1, Verified ORF, "COPII vesicle coat protein required for ER transport vesicle budding; essential factor in endoplasmic reticulum exit site (ERES) formation, as well as in COPII-mediated ER-to-Golgi traffic; bound to periphery of ER membranes and may act to stabilize initial COPII complexes; interacts with Sec23p, Sec24p and …	-	-	-	-	-	-	-	-	-	-	32	14	-	2
	GCN20	GCN20 SGDID:S000001905, Chr VI from 162488-164746, Genome Release 64-2-1, Verified ORF, "Positive regulator of the Gcn2p kinase activity; forms a complex with Gcn1p; proposed to stimulate Gcn2p activation by an uncharged tRNA"	-	-	-	-	-	-	-	-	-	-	25	16	-	2
	SEC24	SEC24 SGDID:S000001371, Chr IX from 160165-157385, Genome Release 64-2-1, reverse complement, Verified ORF, "Component of the Sec23p-Sec24p heterodimer of the COPII vesicle coat; required for cargo selection during vesicle formation in ER to Golgi transport; homologous to Sfb3p; SEC24 has a paralog, SFB2, that arose from the whole genome duplication"	-	-	-	-	-	-	-	-	-	-	21	16	-	2
	SXM1	SXM1 SGDID:S000002803, Chr IV from 1263324-1266158, Genome Release 64-2-1, Verified ORF, "Nuclear transport factor (karyopherin); involved in protein transport between the cytoplasm and nucleoplasm; similar to Nmd5p, Cse1p, Lph2p, and the human cellular apoptosis susceptibility protein, CAS1"	-	-	-	-	-	-	-	-	-	-	23	-	21	2
	RIX7	RIX7 SGDID:S000003957, Chr XII from 73146-70633, Genome Release 64-2-1, reverse complement, Verified ORF, "Putative ATPase of the AAA family; required for export of pre-ribosomal large subunits from the nucleus; distributed between the nucleolus, nucleoplasm, and nuclear periphery depending on growth conditions"	-	-	-	-	-	-	-	-	-	-	21	-	13	2
	NUP145	NUP145 SGDID:S000003060, Chr VII from 337906-341859, Genome Release 64-2-1, Verified ORF, "Essential protein with distinct roles in two nuclear pore subcomplexes; catalyzes its own proteolytic cleavage in vivo to generate a C-terminal fragment that is a structural component of the Nup84p subcomplex (with roles in NPC biogenesis and localization of genes to the nuclear periphery), and an N-termina…	-	-	-	-	-	-	-	-	-	-	24	8	-	2
	PUF4	PUF4 SGDID:S000002982, Chr VII from 466141-468807, Genome Release 64-2-1, Verified ORF, "Member of the PUF protein family; PUF family is defined by the presence of Pumilio homology domains that confer RNA binding activity; preferentially binds mRNAs encoding nucleolar ribosomal RNA-processing factors"	-	-	-	-	-	-	-	-	-	-	19	17	-	2
	CYC8	CYC8 SGDID:S000000316, Chr II from 465770-462870, Genome Release 64-2-1, reverse complement, Verified ORF, "General transcriptional co-repressor; acts together with Tup1p; also acts as part of a transcriptional co-activator complex that recruits the SWI/SNF and SAGA complexes to promoters; can form the prion [OCT+]"	-	-	-	-	-	-	-	-	-	-	23	-	9	2
	GIN4	GIN4 SGDID:S000002915, Chr IV from 1465786-1462358, Genome Release 64-2-1, reverse complement, Verified ORF, "Protein kinase involved in bud growth and assembly of the septin ring; proposed to have kinase-dependent and kinase-independent activities; undergoes autophosphorylation; similar to Hsl1p; GIN4 has a paralog, KCC4, that arose from the whole genome duplication"	-	-	-	-	-	-	-	-	-	-	18	-	13	2
	NUP85	NUP85 SGDID:S000003803, Chr X from 514055-516289, Genome Release 64-2-1, Verified ORF, "Subunit of the Nup84p subcomplex of the nuclear pore complex (NPC); contributes to nucleocytoplasmic transport and NPC biogenesis and is involved in establishment of a normal nucleocytoplasmic concentration gradient of the GTPase Gsp1p; also plays roles in several processes that may require localization of gen…	-	-	-	-	-	-	-	-	-	-	16	-	6	2
	BCH1	BCH1 SGDID:S000004850, Chr XIII from 743749-745923, Genome Release 64-2-1, Verified ORF, "Member of the ChAPs family (Chs5p-Arf1p-binding proteins); members include Bch1p, Bch2p, Bud7p, and Chs6p; ChAPs family proteins form the exomer complex with Chs5p to mediate export of specific cargo proteins from the Golgi to the plasma membrane; may interact with ribosomes; protein abundance increases and …	-	-	-	-	-	-	-	-	-	-	16	-	11	2
	MTR10	MTR10 SGDID:S000005686, Chr XV from 633839-636757, Genome Release 64-2-1, Verified ORF, "Nuclear import receptor; mediates the nuclear localization of proteins involved in mRNA-nucleus export; promotes dissociation of mRNAs from the nucleus-cytoplasm mRNA shuttling protein Npl3p; required for retrograde import of mature tRNAs; relocalizes from cytoplasm to the nuclear periphery upon DNA replicati…	-	-	-	-	-	-	-	-	-	-	20	-	15	2
	PAT1	PAT1 SGDID:S000000673, Chr III from 252628-250238, Genome Release 64-2-1, reverse complement, Verified ORF, "Deadenylation-dependent mRNA-decapping factor; also required for faithful chromosome transmission, maintenance of rDNA locus stability, and protection of mRNA 3'-UTRs from trimming; associated with topoisomerase II; binds to mRNAs under glucose starvation, most often in the 3' UTR; functio…	-	-	-	-	-	-	-	-	-	-	22	14	-	2
	MAK5	MAK5 SGDID:S000000346, Chr II from 528317-530638, Genome Release 64-2-1, Verified ORF, "Essential nucleolar protein; putative DEAD-box RNA helicase required for maintenance of M1 dsRNA virus; involved in biogenesis of large (60S) ribosomal subunits"	-	-	-	-	-	-	-	-	-	-	14	-	10	2
	RET1	RET1 SGDID:S000005733, Chr XV from 733457-730008, Genome Release 64-2-1, reverse complement, Verified ORF, "Second-largest subunit of RNA polymerase III; RNA polymerase III is responsible for the transcription of tRNA and 5S RNA genes, and other low molecular weight RNAs"	-	-	-	-	-	-	-	-	-	-	16	-	14	2
	POL5	POL5 SGDID:S000000781, Chr V from 51539-48471, Genome Release 64-2-1, reverse complement, Verified ORF, "DNA Polymerase phi; has sequence similarity to the human MybBP1A and weak sequence similarity to B-type DNA polymerases, not required for chromosomal DNA replication; required for the synthesis of rRNA"	-	-	-	-	-	-	-	-	-	-	16	-	7	2
	RPS0B	RPS0B SGDID:S000004038, Chr XII from 242232-242321,242681-243349, Genome Release 64-2-1, Verified ORF, "Protein component of the small (40S) ribosomal subunit; RPS0B has a paralog, RPS0A, that arose from the whole genome duplication; required for maturation of 18S rRNA along with Rps0Ap; deletion of either RPS0 gene reduces growth rate, deletion of both genes is lethal; homologous to human riboso…	-	-	-	-	-	-	-	-	-	-	16	14	-	2
	SIN4	SIN4 SGDID:S000005180, Chr XIV from 206930-209854, Genome Release 64-2-1, Verified ORF, "Subunit of the RNA polymerase II mediator complex; associates with core polymerase subunits to form the RNA polymerase II holoenzyme; contributes to both postive and negative transcriptional regulation; dispensible for basal transcription"	-	-	-	-	-	-	-	-	-	-	14	-	7	2
	HGH1	HGH1 SGDID:S000003419, Chr VII from 871416-870232, Genome Release 64-2-1, reverse complement, Verified ORF, "Nonessential protein of unknown function; predicted to be involved in ribosome biogenesis; green fluorescent protein (GFP)-fusion protein localizes to the cytoplasm; similar to mammalian BRP16 (Brain protein 16); relative distribution to the nucleus increases upon DNA replication stress"	-	-	-	-	-	-	-	-	-	-	12	17	-	2
	YKR018C	YKR018C SGDID:S000001726, Chr XI from 475900-473723, Genome Release 64-2-1, reverse complement, Verified ORF, "Protein of unknown function; green fluorescent protein (GFP)-fusion protein localizes to the cytoplasm and nucleus; protein abundance increases in response to DNA replication stress; YKR018C has a paralog, IML2, that arose from the whole genome duplication"	-	-	-	-	-	-	-	-	-	-	18	-	10	2
	SYH1	SYH1 SGDID:S000006026, Chr XVI from 355412-352863, Genome Release 64-2-1, reverse complement, Verified ORF, "Protein of unknown function that influences nuclear pore distribution; co-purifies with ribosomes; contains a GYF domain, which bind proline-rich sequences; deletion extends chronological lifespan; SYH1 has a paralog, SMY2, that arose from the whole genome duplication"	-	-	-	-	-	-	-	-	-	-	12	-	8	2
	SEC10	SEC10 SGDID:S000004156, Chr XII from 498044-495429, Genome Release 64-2-1, reverse complement, Verified ORF, "Essential 100kDa subunit of the exocyst complex; the exocyst mediates polarized targeting and tethering of post-Golgi secretory vesicles to active sites of exocytosis at the plasma membrane prior to SNARE-mediated fusion"	-	-	-	-	-	-	-	-	-	-	12	-	8	2
	PDR16	PDR16 SGDID:S000005175, Chr XIV from 217042-215987, Genome Release 64-2-1, reverse complement, Verified ORF, "Phosphatidylinositol transfer protein (PITP); controlled by the multiple drug resistance regulator Pdr1p; localizes to lipid particles and microsomes; controls levels of various lipids, may regulate lipid synthesis; homologous to Pdr17p; protein abundance increases in response to DNA repl…	-	-	-	-	-	-	-	-	-	-	9	-	7	2
	TRM732	TRM732 SGDID:S000004872, Chr XIII from 788883-784621, Genome Release 64-2-1, reverse complement, Verified ORF, "Interacts with Trm7p for 2'-O-methylation of C32 of substrate tRNAs; green fluorescent protein (GFP)-fusion protein localizes to the cytoplasm; non-essential gene"	-	-	-	-	-	-	-	-	-	-	12	-	10	2
	PIK1	PIK1 SGDID:S000005211, Chr XIV from 140878-144078, Genome Release 64-2-1, Verified ORF, "Phosphatidylinositol 4-kinase; catalyzes first step in the biosynthesis of phosphatidylinositol-4,5-biphosphate; may control cytokinesis through the actin cytoskeleton; may control nonselective autophagy and mitophagy through trafficking of Atg9p"	-	-	-	-	-	-	-	-	-	-	12	8	-	2
	YLR287C	YLR287C SGDID:S000004277, Chr XII from 712058-710991, Genome Release 64-2-1, reverse complement, Uncharacterized ORF, "Putative protein of unknown function; green fluorescent protein (GFP)-fusion protein localizes to the cytoplasm; YLR287C is not an essential gene"	-	-	-	-	-	-	-	-	-	-	10	7	-	2
	MSN5	MSN5 SGDID:S000002743, Chr IV from 1141168-1144842, Genome Release 64-2-1, Verified ORF, "Karyopherin; involved in nuclear import and export of proteins, including import of replication protein A and export of Far1p and transcription factors Swi5p, Swi6p, Msn2p, and Pho4p; required for re-export of mature tRNAs after their retrograde import from the cytoplasm; exportin-5 homolog"	-	-	-	-	-	-	-	-	-	-	11	-	22	2
	COG4	COG4 SGDID:S000006309, Chr XVI from 739569-736984, Genome Release 64-2-1, reverse complement, Verified ORF, "Essential component of the conserved oligomeric Golgi complex; a cytosolic tethering complex (Cog1p through Cog8p) that functions in protein trafficking to mediate fusion of transport vesicles to Golgi compartments"	-	-	-	-	-	-	-	-	-	-	13	9	-	2
	SFB2	SFB2 SGDID:S000004994, Chr XIV from 537911-535281, Genome Release 64-2-1, reverse complement, Verified ORF, "Component of the Sec23p-Sfb2p heterodimer of the COPII vesicle coat; required for cargo selection during vesicle formation in ER to Golgi transport; homologous to Sfb3p; SFB2 has a paralog, SEC24, that arose from the whole genome duplication"	-	-	-	-	-	-	-	-	-	-	10	-	13	2
	TIP20	TIP20 SGDID:S000003113, Chr VII from 230243-232348, Genome Release 64-2-1, Verified ORF, "Peripheral membrane protein required for COPI vesicle fusion to the ER; prohibits back-fusion of COPII vesicles with the ER; forms a tethering complex with Sec39p and Dsl1p that interacts with ER SNAREs Sec20p and Use1p"	-	-	-	-	-	-	-	-	-	-	10	7	-	2
	SAP155	SAP155 SGDID:S000001936, Chr VI from 234242-237250, Genome Release 64-2-1, Verified ORF, "Protein required for function of the Sit4p protein phosphatase; forms a complex with Sit4p; member of a family of similar proteins including Sap4p, Sap185p, and Sap190p; protein abundance increases in response to DNA replication stress; SAP155 has a paralog, SAP4, that arose from the whole genome duplication"	-	-	-	-	-	-	-	-	-	-	14	8	-	2
	TPS3	TPS3 SGDID:S000004874, Chr XIII from 793369-790205, Genome Release 64-2-1, reverse complement, Verified ORF, "Regulatory subunit of trehalose-6-phosphate synthase/phosphatase; involved in synthesis of storage carbohydrate trehalose; expression is induced by stress conditions and repressed by the Ras-cAMP pathway; TPS3 has a paralog, TSL1, that arose from the whole genome duplication"	-	-	-	-	-	-	-	-	-	-	9	-	8	2
	RPL11B	RPL11B SGDID:S000003317, Chr VII from 648907-648383, Genome Release 64-2-1, reverse complement, Verified ORF, "Ribosomal 60S subunit protein L11B; expressed at half the level of Rpl11Ap; involved in ribosomal assembly; depletion causes degradation of 60S proteins and RNA; homologous to mammalian ribosomal protein L11 and bacterial L5; RPL11B has a paralog, RPL11A, that arose from the whole genome…	-	-	-	-	-	-	-	-	-	-	22	-	31	2
	SUA5	SUA5 SGDID:S000003137, Chr VII from 186059-187339, Genome Release 64-2-1, Verified ORF, "Protein involved in threonylcarbamoyl adenosine biosynthesis; Sua5p and Qri7p are necessary and sufficient for RNA t6A modification in vitro; null mutant lacks N6-threonylcarbamoyl adenosine (t6A) modification in the anticodon loop of ANN-decoding tRNA; member of conserved YrdC/Sua5 family; binds single-stran…	-	-	-	-	-	-	-	-	-	-	9	-	7	2
	GYP5	GYP5 SGDID:S000006170, Chr XVI from 79353-76669, Genome Release 64-2-1, reverse complement, Verified ORF, "GTPase-activating protein (GAP) for yeast Rab family members; involved in ER to Golgi trafficking; exhibits GAP activity toward Ypt1p that is stimulated by Gyl1p, also acts on Sec4p; interacts with Gyl1p, Rvs161p and Rvs167p; involved in recruiting Rvs167p to the bud tip during polarized gro…	-	-	-	-	-	-	-	-	-	-	10	7	-	2
	SIS2	SIS2 SGDID:S000001780, Chr XI from 578123-576435, Genome Release 64-2-1, reverse complement, Verified ORF, "Negative regulatory subunit of protein phosphatase 1 (Ppz1p); involved in coenzyme A biosynthesis; subunit of phosphopantothenoylcysteine decarboxylase (PPCDC: Cab3p, Sis2p, Vhs3p) complex and the CoA-Synthesizing Protein Complex (CoA-SPC: Cab2p, Cab3p, Cab4p, Cab5p, Sis2p and Vhs3p); SIS2 …	-	-	-	-	-	-	-	-	-	-	6	-	6	2
	SNF12	SNF12 SGDID:S000005306, Chr XIV from 670418-672118, Genome Release 64-2-1, Verified ORF, "73 kDa subunit of the SWI/SNF chromatin remodeling complex; involved in transcriptional regulation; relocates to the cytosol under hypoxic conditions; deletion mutants are temperature-sensitive; SNF12 has a paralog, RSC6, that arose from the whole genome duplication"	-	-	-	-	-	-	-	-	-	-	7	6	-	2
	ECM21	ECM21 SGDID:S000000197, Chr II from 28299-24946, Genome Release 64-2-1, reverse complement, Verified ORF, "Protein involved in regulating endocytosis of plasma membrane proteins; identified as a substrate for ubiquitination by Rsp5p and deubiquitination by Ubp2p; promoter contains several Gcn4p binding elements; ECM21 has a paralog, CSR2, that arose from the whole genome duplication"	-	-	-	-	-	-	-	-	-	-	8	-	6	2
	RPL31B	RPL31B SGDID:S000004398, Chr XII from 931349-931065,931755-931699, Genome Release 64-2-1, reverse complement, Verified ORF, "Ribosomal 60S subunit protein L31B; associates with karyopherin Sxm1p; loss of both Rpl31p and Rpl39p confers lethality; homologous to mammalian ribosomal protein L31, no bacterial homolog; RPL31B has a paralog, RPL31A, that arose from the whole genome duplication"	-	-	-	-	-	-	-	-	-	-	12	-	10	2
	CTR86	CTR86 SGDID:S000000650, Chr III from 220067-218376, Genome Release 64-2-1, reverse complement, Verified ORF, "Essential protein of unknown function; with orthologs in Ashbya gossypii and Candida albicans; similar to human ATXN10, mutations in which cause spinocerebellar ataxia type 10; codon usage corresponds to that observed for yeast genes expressed at low levels; relative distribution to the n…	-	-	-	-	-	-	-	-	-	-	7	-	6	2
	INP53	INP53 SGDID:S000005635, Chr XV from 525278-528601, Genome Release 64-2-1, Verified ORF, "Polyphosphatidylinositol phosphatase; dephosphorylates multiple phosphatidylinositol phosphates; involved in trans Golgi network-to-early endosome pathway; hyperosmotic stress causes translocation to actin patches; contains Sac1 and 5-ptase domains; INP53 has a paralog, INP52, that arose from the whole genome…	-	-	-	-	-	-	-	-	-	-	9	7	-	2
	HEL2	HEL2 SGDID:S000002674, Chr IV from 1002023-1000104, Genome Release 64-2-1, reverse complement, Verified ORF, "RING finger ubiquitin ligase (E3); involved in ubiquitylation and degradation of excess histones; interacts with Ubc4p and Rad53p; null mutant sensitive to hydroxyurea (HU); green fluorescent protein (GFP)-fusion protein localizes to the cytoplasm; computational analysis suggests a role a…	-	-	-	-	-	-	-	-	-	-	7	-	9	2
	SWH1	SWH1 SGDID:S000000081, Chr I from 192619-196185, Genome Release 64-2-1, Verified ORF, "Protein similar to mammalian oxysterol-binding protein; contains ankyrin repeats; localizes to the Golgi and the nucleus-vacuole junction; SWH1 has a paralog, OSH2, that arose from the whole genome duplication"	-	-	-	-	-	-	-	-	-	-	9	6	-	2
	DMA2	DMA2 SGDID:S000005060, Chr XIV from 408341-409909, Genome Release 64-2-1, Verified ORF, "Ubiquitin-protein ligase (E3); controls septin dynamics and spindle position checkpoint (SPOC) with ligase Dma1p by regulating recruitment of Elm1p to bud neck; regulates levels of eIF2 subunit Gcd11p, as well as abundance, localization, and ubiquitination of Cdk inhibitory kinase Swe1p; ortholog of human RNF…	-	-	-	-	-	-	-	-	-	-	7	-	7	2
	ENP2	ENP2 SGDID:S000003377, Chr VII from 781767-783890, Genome Release 64-2-1, Verified ORF, "Component of the SSU; required for pre-18S rRNA processing, biogenesis of the small ribosomal subunit; interacts with U3 snoRNA, Mpp10p and Bfr2p; contains WD repeats, and has homology to Spb1p"	-	-	-	-	-	-	-	-	-	-	6	-	6	2
	IMH1	IMH1 SGDID:S000004300, Chr XII from 751769-749034, Genome Release 64-2-1, reverse complement, Verified ORF, "Protein involved in vesicular transport; mediates transport between an endosomal compartment and the Golgi, contains a Golgi-localization (GRIP) domain that interacts with activated Arl1p-GTP to localize Imh1p to the Golgi"	-	-	-	-	-	-	-	-	-	-	6	6	-	2
	ELP2	ELP2 SGDID:S000003432, Chr VII from 902270-899904, Genome Release 64-2-1, reverse complement, Verified ORF, "Subunit of Elongator complex; Elongator is required for modification of wobble nucleosides in tRNA; target of Kluyveromyces lactis zymocin"	-	-	-	-	-	-	-	-	-	-	7	6	-	2
	ATF2	ATF2 SGDID:S000003409, Chr VII from 850436-848829, Genome Release 64-2-1, reverse complement, Verified ORF, "Alcohol acetyltransferase; may play a role in steroid detoxification; forms volatile esters during fermentation, which is important for brewing and winemaking"	-	-	-	-	-	-	-	-	-	-	-	12	12	2
	SLM1	SLM1 SGDID:S000001367, Chr IX from 169641-167581, Genome Release 64-2-1, reverse complement, Verified ORF, "Phosphoinositide PI4,5P(2) binding protein, forms a complex with Slm2p; acts downstream of Mss4p in a pathway regulating actin cytoskeleton organization in response to stress; phosphorylated by the TORC2 complex; protein abundance increases in response to DNA replication stress; SLM1 has a …	-	-	-	-	-	-	-	-	-	-	-	8	7	2
	DBF2	DBF2 SGDID:S000003324, Chr VII from 668189-669907, Genome Release 64-2-1, Verified ORF, "Ser/Thr kinase involved in transcription and stress response; functions as part of a network of genes in exit from mitosis; localization is cell cycle regulated; activated by Cdc15p during the exit from mitosis; also plays a role in regulating the stability of SWI5 and CLB2 mRNAs; phosphorylates Chs2p to regu…	-	-	-	-	-	-	-	-	-	-	-	9	7	2
	TRL1	TRL1 SGDID:S000003623, Chr X from 272485-270002, Genome Release 64-2-1, reverse complement, Verified ORF, "tRNA ligase; required for tRNA splicing and for both splicing and translation of HAC1 mRNA in the UPR; has phosphodiesterase, polynucleotide kinase, and ligase activities; localized at the inner nuclear envelope and partially to polysomes"	-	-	-	-	-	-	-	-	-	-	-	9	11	2
	HPM1	HPM1 SGDID:S000001372, Chr IX from 156045-157178, Genome Release 64-2-1, Verified ORF, "AdoMet-dependent methyltransferase; involved in a novel 3-methylhistidine modification of ribosomal protein Rpl3p; seven beta-strand MTase family member; null mutant exhibits a weak vacuolar protein sorting defect and caspofungin resistance"	-	-	-	-	-	-	-	-	-	-	-	7	7	2
	AVT1	AVT1 SGDID:S000003761, Chr X from 436802-438610, Genome Release 64-2-1, Verified ORF, "Vacuolar transporter; imports large neutral amino acids into the vacuole; member of a family of seven S. cerevisiae genes (AVT1-7) related to vesicular GABA-glycine transporters"	14	-	-	-	-	-	-	-	-	-	-	-	-	1
	RGD1	RGD1 SGDID:S000000464, Chr II from 734639-732639, Genome Release 64-2-1, reverse complement, Verified ORF, "GTPase-activating protein (RhoGAP) for Rho3p and Rho4p; possibly involved in control of actin cytoskeleton organization"	13	-	-	-	-	-	-	-	-	-	-	-	-	1
	EPO1	EPO1 SGDID:S000004731, Chr XIII from 514456-517287, Genome Release 64-2-1, Verified ORF, "Protein involved in septin-ER tethering; interacts with ER membrane protein, Scs2p, and Shs1p, a septin ring component, at bud neck to create ER diffusion barrier; GFP-fusion protein localizes to the cell periphery, cytoplasm, bud, and bud neck; interacts with Crm1p in two-hybrid assay; YMR124W has a paralog…	15	-	-	-	-	-	-	-	-	-	-	-	-	1
	PTP3	PTP3 SGDID:S000000877, Chr V from 311199-308413, Genome Release 64-2-1, reverse complement, Verified ORF, "Phosphotyrosine-specific protein phosphatase; involved in the inactivation of mitogen-activated protein kinase (MAPK) during osmolarity sensing; dephosporylates Hog1p MAPK and regulates its localization; localized to the cytoplasm"	11	-	-	-	-	-	-	-	-	-	-	-	-	1
	LTE1	LTE1 SGDID:S000000022, Chr I from 105872-101565, Genome Release 64-2-1, reverse complement, Verified ORF, "Protein similar to GDP/GTP exchange factors; without detectable GEF activity; required for asymmetric localization of Bfa1p at daughter-directed spindle pole bodies and for mitotic exit at low temperatures"	9	-	-	-	-	-	-	-	-	-	-	-	-	1
	CAF40	CAF40 SGDID:S000005232, Chr XIV from 90303-91424, Genome Release 64-2-1, Verified ORF, "Component of the CCR4-NOT transcriptional complex; evolutionarily conserved; involved in controlling mRNA initiation, elongation, and degradation; binds Cdc39p"	9	-	-	-	-	-	-	-	-	-	-	-	-	1
	SPB4	SPB4 SGDID:S000001894, Chr VI from 146934-145114, Genome Release 64-2-1, reverse complement, Verified ORF, "Putative ATP-dependent RNA helicase; nucleolar protein required for synthesis of 60S ribosomal subunits at a late step in the pathway; sediments with 66S pre-ribosomes in sucrose gradients"	7	-	-	-	-	-	-	-	-	-	-	-	-	1
	MKK2	MKK2 SGDID:S000006061, Chr XVI from 289034-287514, Genome Release 64-2-1, reverse complement, Verified ORF, "MAPKK involved in the protein kinase C signaling pathway; involved in control of cell integrity; upon activation by Bck1p phosphorylates downstream target, Slt2p; functionally redundant with Mkk1p; MKK2 has a paralog, MKK1, that arose from the whole genome duplication"	7	-	-	-	-	-	-	-	-	-	-	-	-	1
	CTF18	CTF18 SGDID:S000004683, Chr XIII from 424728-422503, Genome Release 64-2-1, reverse complement, Verified ORF, "Subunit of a complex with Ctf8p; shares some subunits with Replication Factor C and is required for sister chromatid cohesion; may have overlapping functions with Rad24p in the DNA damage replication checkpoint"	7	-	-	-	-	-	-	-	-	-	-	-	-	1
	GRR1	GRR1 SGDID:S000003850, Chr X from 594327-590872, Genome Release 64-2-1, reverse complement, Verified ORF, "F-box protein component of an SCF ubiquitin-ligase complex; modular substrate specificity factor which associates with core SCF (Cdc53p, Skp1p and Hrt1p/Rbx1p) to form the SCF(Grr1) complex; SCF(Grr1) acts as a ubiquitin-protein ligase directing ubiquitination of substrates such as: Gic2p, M…	7	-	-	-	-	-	-	-	-	-	-	-	-	1
	SEG2	SEG2 SGDID:S000001588, Chr XI from 242583-239185, Genome Release 64-2-1, reverse complement, Verified ORF, "Eisosome component; likely plays only minor role in eisosome assembly; shown to interact with Seg1p; similar to A. gossypii SEG gene which is important for stabilizing eisosomes; SEG2 has a paralog, SEG1, that arose from the whole genome duplication"	6	-	-	-	-	-	-	-	-	-	-	-	-	1
	GCN2	GCN2 SGDID:S000002691, Chr IV from 1030049-1025070, Genome Release 64-2-1, reverse complement, Verified ORF, "Protein kinase; phosphorylates the alpha-subunit of translation initiation factor eIF2 (Sui2p) in response to starvation; activated by uncharged tRNAs and the Gcn1p-Gcn20p complex; contributes to DNA damage checkpoint control"	6	-	-	-	-	-	-	-	-	-	-	-	-	1
	HUL5	HUL5 SGDID:S000003109, Chr VII from 238353-241085, Genome Release 64-2-1, Verified ORF, "Multiubiquitin chain assembly factor (E4); proteasome processivity factor that elongates polyUb chains on substrates, opposing Ubp6p, a branched polyubiquitin protease; required for retrograde transport of misfolded proteins during ERAD"	6	-	-	-	-	-	-	-	-	-	-	-	-	1
	MAD2	MAD2 SGDID:S000003567, Chr X from 387657-388247, Genome Release 64-2-1, Verified ORF, "Component of the spindle-assembly checkpoint complex; delays onset of anaphase in cells with defects in mitotic spindle assembly; forms a complex with Mad1p; regulates APC/C activity during prometaphase and metaphase of meiosis I; gene dosage imbalance between MAD1 and MAD2 leads to chromosome instability"	6	-	-	-	-	-	-	-	-	-	-	-	-	1
	RTP1	RTP1 SGDID:S000004797, Chr XIII from 629025-631970, Genome Release 64-2-1, Verified ORF, "Protein required for the nuclear import and biogenesis of RNA pol II; conflicting evidence on whether null mutant is viable with elongated buds, or inviable; interacts with Rpb2, Rpb3, Nup116p, Nup100p and components of the R2TP complex (Rvb1p, Rvb2p, Pih1p); similar to human TMCO7 gene"	6	-	-	-	-	-	-	-	-	-	-	-	-	1
	TSC11	TSC11 SGDID:S000000895, Chr V from 347612-343320, Genome Release 64-2-1, reverse complement, Verified ORF, "Subunit of TORC2 (Tor2p-Lst8p-Avo1-Avo2-Tsc11p-Bit61p); TORC2 is a membrane-associated complex that regulates actin cytoskeletal dynamics during polarized growth and cell wall integrity; involved in sphingolipid metabolism; contains a RasGEFN domain"	6	-	-	-	-	-	-	-	-	-	-	-	-	1
	ITC1	ITC1 SGDID:S000003101, Chr VII from 257707-261501, Genome Release 64-2-1, Verified ORF, "Subunit of ATP-dependent Isw2p-Itc1p chromatin remodeling complex; required for repression of a-specific genes, repression of early meiotic genes during mitotic growth, and repression of INO1; similar to mammalian Acf1p, the regulatory subunit of the mammalian ATP-utilizing chromatin assembly and modifying fa…	6	-	-	-	-	-	-	-	-	-	-	-	-	1
	EMI2	EMI2 SGDID:S000002924, Chr IV from 1476476-1474974, Genome Release 64-2-1, reverse complement, Verified ORF, "Non-essential protein of unknown function; required for transcriptional induction of the early meiotic-specific transcription factor IME1; required for sporulation; expression regulated by glucose-repression transcription factors Mig1/2p; EMI2 has a paralog, GLK1, that arose from the whol…	-	23	-	-	-	-	-	-	-	-	-	-	-	1
	GPH1	GPH1 SGDID:S000006364, Chr XVI from 861306-864014, Genome Release 64-2-1, Verified ORF, "Glycogen phosphorylase required for the mobilization of glycogen; non-essential; regulated by cyclic AMP-mediated phosphorylation; expression is regulated by stress-response elements and by the HOG MAP kinase pathway"	-	19	-	-	-	-	-	-	-	-	-	-	-	1
	ALD4	ALD4 SGDID:S000005901, Chr XV from 1039840-1041399, Genome Release 64-2-1, Verified ORF, "Mitochondrial aldehyde dehydrogenase; required for growth on ethanol and conversion of acetaldehyde to acetate; phosphorylated; activity is K+ dependent; utilizes NADP+ or NAD+ equally as coenzymes; expression is glucose repressed; can substitute for cytosolic NADP-dependent aldehyde dehydrogenase when direc…	-	19	-	-	-	-	-	-	-	-	-	-	-	1
	ALD3	ALD3 SGDID:S000004779, Chr XIII from 600872-599352, Genome Release 64-2-1, reverse complement, Verified ORF, "Cytoplasmic aldehyde dehydrogenase; involved in beta-alanine synthesis; uses NAD+ as the preferred coenzyme; very similar to Ald2p; expression is induced by stress and repressed by glucose"	-	24	-	-	-	-	-	-	-	-	-	-	-	1
	DCS1	DCS1 SGDID:S000004260, Chr XII from 681186-682238, Genome Release 64-2-1, Verified ORF, "Non-essential hydrolase involved in mRNA decapping; activates Xrn1p; may function in a feedback mechanism to regulate deadenylation, contains pyrophosphatase activity and a HIT (histidine triad) motif; acts as inhibitor of neutral trehalase Nth1p; required for growth on glycerol medium; protein abundance incr…	-	17	-	-	-	-	-	-	-	-	-	-	-	1
	YRO2	YRO2 SGDID:S000000258, Chr II from 343101-344135, Genome Release 64-2-1, Verified ORF, "Protein of unknown function with similarity to archaeal rhodopsins; the authentic, non-tagged protein is detected in a phosphorylated state in highly purified mitochondria in high-throughput studies; transcriptionally regulated by Haa1p; YRO2 has a paralog, MRH1, that arose from the whole genome duplication"	-	13	-	-	-	-	-	-	-	-	-	-	-	1
	TRZ1	TRZ1 SGDID:S000001787, Chr XI from 589305-586789, Genome Release 64-2-1, reverse complement, Verified ORF, "tRNA 3'-end processing endonuclease tRNase Z; also localized to mitochondria and interacts genetically with Rex2 exonuclease; homolog of the human candidate prostate cancer susceptibility gene ELAC2"	-	12	-	-	-	-	-	-	-	-	-	-	-	1
	GAD1	GAD1 SGDID:S000004862, Chr XIII from 770801-772558, Genome Release 64-2-1, Verified ORF, "Glutamate decarboxylase; converts glutamate into gamma-aminobutyric acid (GABA) during glutamate catabolism; involved in response to oxidative stress"	-	15	-	-	-	-	-	-	-	-	-	-	-	1
	AIM17	AIM17 SGDID:S000001013, Chr VIII from 65859-64462, Genome Release 64-2-1, reverse complement, Verified ORF, "Putative protein of unknown function; the authentic, non-tagged protein is detected in highly purified mitochondria in high-throughput studies; null mutant displays reduced frequency of mitochondrial genome loss"	-	11	-	-	-	-	-	-	-	-	-	-	-	1
	ALD2	ALD2 SGDID:S000004780, Chr XIII from 603082-601562, Genome Release 64-2-1, reverse complement, Verified ORF, "Cytoplasmic aldehyde dehydrogenase; involved in ethanol oxidation and beta-alanine biosynthesis; uses NAD+ as the preferred coenzyme; expression is stress induced and glucose repressed; very similar to Ald3p"	-	10	-	-	-	-	-	-	-	-	-	-	-	1
	GLC3	GLC3 SGDID:S000000737, Chr V from 133120-135234, Genome Release 64-2-1, Verified ORF, "Glycogen branching enzyme, involved in glycogen accumulation; green fluorescent protein (GFP)-fusion protein localizes to the cytoplasm in a punctate pattern; relocalizes from nucleus to cytoplasmic foci upon DNA replication stress"	-	11	-	-	-	-	-	-	-	-	-	-	-	1
	ICY2	ICY2 SGDID:S000006171, Chr XVI from 74719-74309, Genome Release 64-2-1, reverse complement, Verified ORF, "Protein of unknown function; mobilized into polysomes upon a shift from a fermentable to nonfermentable carbon source; potential Cdc28p substrate; ICY2 has a paralog, ICY1, that arose from the whole genome duplication"	-	11	-	-	-	-	-	-	-	-	-	-	-	1
	YMR196W	YMR196W SGDID:S000004809, Chr XIII from 655076-658342, Genome Release 64-2-1, Uncharacterized ORF, "Putative protein of unknown function; green fluorescent protein (GFP)-fusion protein localizes to the cytoplasm; YMR196W is not an essential gene"	-	9	-	-	-	-	-	-	-	-	-	-	-	1
	CCC2	CCC2 SGDID:S000002678, Chr IV from 1005675-1008689, Genome Release 64-2-1, Verified ORF, "Cu(+2)-transporting P-type ATPase; required for export of copper from the cytosol into an extracytosolic compartment; has similarity to human proteins involved in Menkes and Wilsons diseases; protein abundance increases in response to DNA replication stress; affects TBSV model (+)RNA virus replication by reg…	-	7	-	-	-	-	-	-	-	-	-	-	-	1
	UGA1	UGA1 SGDID:S000003251, Chr VII from 525229-526644, Genome Release 64-2-1, Verified ORF, "Gamma-aminobutyrate (GABA) transaminase; also known as 4-aminobutyrate aminotransferase; involved in the 4-aminobutyrate and glutamate degradation pathways; required for normal oxidative stress tolerance and nitrogen utilization; protein abundance increases in response to DNA replication stress"	-	7	-	-	-	-	-	-	-	-	-	-	-	1
	NCE103	NCE103 SGDID:S000004981, Chr XIV from 559814-560479, Genome Release 64-2-1, Verified ORF, "Carbonic anhydrase; metalloenzyme that catalyzes CO2 hydration to bicarbonate, which is an important metabolic substrate, and protons; not expressed under conditions of high CO2, such as inside a growing colony, but transcription is induced in response to low CO2 levels, such as on the colony surface in amb…	-	6	-	-	-	-	-	-	-	-	-	-	-	1
	YLR177W	YLR177W SGDID:S000004167, Chr XII from 511054-512940, Genome Release 64-2-1, Uncharacterized ORF, "Putative protein of unknown function; phosphorylated by Dbf2p-Mob1p in vitro; some strains contain microsatellite polymophisms at this locus; not an essential gene; YLR177W has a paralog, PSP1, that arose from the whole genome duplication"	-	6	-	-	-	-	-	-	-	-	-	-	-	1
	SRB2	SRB2 SGDID:S000001083, Chr VIII from 189749-189131,189864-189851, Genome Release 64-2-1, reverse complement, Verified ORF, "Subunit of the RNA polymerase II mediator complex; associates with core polymerase subunits to form the RNA polymerase II holoenzyme; general transcription factor involved in telomere maintenance"	-	6	-	-	-	-	-	-	-	-	-	-	-	1
	CDC55	CDC55 SGDID:S000003158, Chr VII from 147389-145809, Genome Release 64-2-1, reverse complement, Verified ORF, "Non-essential regulatory subunit B of protein phosphatase 2A (PP2A); localization to cytoplasm requires Zds1p and Zds2p and promotes mitotic entry; localization to nucleus prevents mitotic exit; required for correct nuclear division and chromosome segregation in meiosis; maintains nucleol…	-	-	8	-	-	-	-	-	-	-	-	-	-	1
	UBX6	UBX6 SGDID:S000003584, Chr X from 348637-347447, Genome Release 64-2-1, reverse complement, Verified ORF, "UBX (ubiquitin regulatory X) domain-containing protein; interacts with Cdc48p, transcription is repressed when cells are grown in media containing inositol and choline; UBX6 has a paralog, UBX7, that arose from the whole genome duplication"	-	-	7	-	-	-	-	-	-	-	-	-	-	1
	RBS1	RBS1 SGDID:S000002348, Chr IV from 122216-123589, Genome Release 64-2-1, Verified ORF, "Protein of unknown function; identified as a high copy suppressor of psk1 psk2 mutations that confer temperature-sensitivity for galactose utilization; proposed to bind single-stranded nucleic acids via its R3H domain"	-	-	7	-	-	-	-	-	-	-	-	-	-	1
	ACE2	ACE2 SGDID:S000004121, Chr XII from 406822-404510, Genome Release 64-2-1, reverse complement, Verified ORF, "Transcription factor required for septum destruction after cytokinesis; phosphorylation by Cbk1p blocks nuclear exit during M/G1 transition, causing localization to daughter cell nuclei, and also increases Ace2p activity; phosphorylation by Cdc28p and Pho85p prevents nuclear import during …	-	-	7	-	-	-	-	-	-	-	-	-	-	1
	SPT7	SPT7 SGDID:S000000285, Chr II from 405251-401253, Genome Release 64-2-1, reverse complement, Verified ORF, "Subunit of the SAGA transcriptional regulatory complex; involved in proper assembly of the complex; also present as a C-terminally truncated form in the SLIK/SALSA transcriptional regulatory complex"	-	-	7	-	-	-	-	-	-	-	-	-	-	1
	SIP1	SIP1 SGDID:S000002830, Chr IV from 1317773-1315326, Genome Release 64-2-1, reverse complement, Verified ORF, "Alternate beta-subunit of the Snf1p kinase complex; may confer substrate specificity; vacuolar protein containing KIS (Kinase-Interacting Sequence) and ASC (Association with Snf1 kinase Complex) domains involved in protein interactions"	-	-	-	14	-	-	-	-	-	-	-	-	-	1
	HOM2	HOM2 SGDID:S000002565, Chr IV from 770357-771454, Genome Release 64-2-1, Verified ORF, "Aspartic beta semi-aldehyde dehydrogenase; catalyzes the second step in the common pathway for methionine and threonine biosynthesis; expression regulated by Gcn4p and the general control of amino acid synthesis"	-	-	-	10	-	-	-	-	-	-	-	-	-	1
	CWP1	CWP1 SGDID:S000001579, Chr XI from 261132-261851, Genome Release 64-2-1, Verified ORF, "Cell wall mannoprotein that localizes to birth scars of daughter cells; linked to a beta-1,3- and beta-1,6-glucan heteropolymer through a phosphodiester bond; required for propionic acid resistance"	-	-	-	9	-	-	-	-	-	-	-	-	-	1
	TIM54	TIM54 SGDID:S000003590, Chr X from 334265-335701, Genome Release 64-2-1, Verified ORF, "Component of the mitochondrial TIM22 complex; involved in insertion of polytopic proteins into the inner membrane"	-	-	-	8	-	-	-	-	-	-	-	-	-	1
	TGL4	TGL4 SGDID:S000001797, Chr XI from 608365-605633, Genome Release 64-2-1, reverse complement, Verified ORF, "Multifunctional lipase/hydrolase/phospholipase; triacylglycerol lipase, steryl ester hydrolase, and Ca2+-independent phospholipase A2; catalyzes acyl-CoA dependent acylation of LPA to PA; required with Tgl3p for timely bud formation; phosphorylated and activated by Cdc28p; TGL4 has a paralo…	-	-	-	7	-	-	-	-	-	-	-	-	-	1
	CTP1	CTP1 SGDID:S000000495, Chr II from 784572-783673, Genome Release 64-2-1, reverse complement, Verified ORF, "Mitochondrial inner membrane citrate transporter; member of the mitochondrial carrier family"	-	-	-	8	-	-	-	-	-	-	-	-	-	1
	AKR2	AKR2 SGDID:S000005560, Chr XV from 397086-394837, Genome Release 64-2-1, reverse complement, Verified ORF, "Ankyrin repeat-containing protein; member of a family of putative palmitoyltransferases containing an Asp-His-His-Cys-cysteine rich (DHHC-CRD) domain; possibly involved in constitutive endocytosis of Ste3p; AKR2 has a paralog, AKR1, that arose from the whole genome duplication"	-	-	-	8	-	-	-	-	-	-	-	-	-	1
	COX15	COX15 SGDID:S000000943, Chr V from 453459-454919, Genome Release 64-2-1, Verified ORF, "Protein required for the hydroxylation of heme O to form heme A; heme A is an essential prosthetic group for cytochrome c oxidase"	-	-	-	7	-	-	-	-	-	-	-	-	-	1
	YNR065C	YNR065C SGDID:S000005348, Chr XIV from 753700-750350, Genome Release 64-2-1, reverse complement, Uncharacterized ORF, "Protein of unknown function; protein-protein interactions suggest a possible role in actin patch formation; YNR065C is not an essential gene"	-	-	-	7	-	-	-	-	-	-	-	-	-	1
	BRF1	BRF1 SGDID:S000003478, Chr VII from 984272-982482, Genome Release 64-2-1, reverse complement, Verified ORF, "TFIIIB B-related factor; one of three subunits of RNA polymerase III transcription initiation factor TFIIIB, binds TFIIIC and TBP and recruits RNA pol III to promoters, amino-terminal half is homologous to TFIIB"	-	-	-	7	-	-	-	-	-	-	-	-	-	1
	MAG2	MAG2 SGDID:S000004419, Chr XII from 988428-990440, Genome Release 64-2-1, Verified ORF, "Cytoplasmic protein of unknown function; induced in response to mycotoxin patulin; ubiquitinated protein similar to the human ring finger motif protein RNF10; predicted to be involved in repair of alkylated DNA due to interaction with MAG1"	-	-	-	7	-	-	-	-	-	-	-	-	-	1
	MPS3	MPS3 SGDID:S000003556, Chr X from 402897-404945, Genome Release 64-2-1, Verified ORF, "Nuclear envelope protein; required for SPB insertion, initiation of SPB duplication and nuclear fusion; interacts with Mps2p to tether half-bridge to core SPB; N-terminal acetylation of Mps3p by Eco1p regulates its role in nuclear organization; localizes to the SPB half bridge and at telomeres during meiosis; r…	-	-	-	6	-	-	-	-	-	-	-	-	-	1
	TRS33	TRS33 SGDID:S000005641, Chr XV from 539465-538659, Genome Release 64-2-1, reverse complement, Verified ORF, "Core component of transport protein particle (TRAPP) complexes I-III; TRAPP complexes are related multimeric guanine nucleotide-exchange factor for the GTPase Ypt1p, regulating ER-Golgi traffic (TRAPPI), intra-Golgi traffic (TRAPPII), endosome-Golgi traffic (TRAPPII and III) and autophagy …	-	-	-	6	-	-	-	-	-	-	-	-	-	1
	NCR1	NCR1 SGDID:S000005927, Chr XVI from 544631-548143, Genome Release 64-2-1, Verified ORF, "Vacuolar membrane protein; transits through the biosynthetic vacuolar protein sorting pathway, involved in sphingolipid metabolism; cells lacking Ncr1p exhibit high levels of long chain bases (LCB), similar to the accumulation of high amounts of lipids observed in patients with Neimann-Pick C, a disease cause…	-	-	-	6	-	-	-	-	-	-	-	-	-	1
	AAC3	AAC3 SGDID:S000000289, Chr II from 415983-416906, Genome Release 64-2-1, Verified ORF, "Mitochondrial inner membrane ADP/ATP translocator; exchanges cytosolic ADP for mitochondrially synthesized ATP; expressed under anaerobic conditions; similar to Aac1p; has roles in maintenance of viability and in respiration; AAC3 has a paralog, PET9, that arose from the whole genome duplication"	-	-	-	-	29	-	-	-	-	-	-	-	-	1
	CHS2	CHS2 SGDID:S000000242, Chr II from 311898-314789, Genome Release 64-2-1, Verified ORF, "Chitin synthase II; catalyzes transfer of N-acetylglucosamine (GlcNAc) to chitin upon activation of zymogenic form; required for chitin synthesis in the primary septum during cytokinesis; localization regulated by Cdk1p during mitosis; phosphorylation by Dbf2p kinase regulates its dynamics and chitin synthesis…	-	-	-	-	15	-	-	-	-	-	-	-	-	1
	GND1	GND1 SGDID:S000001226, Chr VIII from 470960-472429, Genome Release 64-2-1, Verified ORF, "6-phosphogluconate dehydrogenase (decarboxylating); catalyzes an NADPH regenerating reaction in the pentose phosphate pathway; required for growth on D-glucono-delta-lactone and adaptation to oxidative stress; GND1 has a paralog, GND2, that arose from the whole genome duplication"	-	-	-	-	15	-	-	-	-	-	-	-	-	1
	MRD1	MRD1 SGDID:S000006316, Chr XVI from 751919-749256, Genome Release 64-2-1, reverse complement, Verified ORF, "Essential conserved small ribosomal subunit (40s) synthesis factor; component of the 90S preribosome; required for production of 18S rRNA and small ribosomal subunit; contains five consensus RNA-binding domains and binds to the pre-rRNA at two sites within the 18S region"	-	-	-	-	13	-	-	-	-	-	-	-	-	1
	CDC60	CDC60 SGDID:S000006081, Chr XVI from 246990-250262, Genome Release 64-2-1, Verified ORF, "Cytosolic leucyl tRNA synthetase; ligates leucine to the appropriate tRNA"	-	-	-	-	14	-	-	-	-	-	-	-	-	1
	YPR148C	YPR148C SGDID:S000006352, Chr XVI from 828140-826833, Genome Release 64-2-1, reverse complement, Verified ORF, "Protein of unknown function; may interact with ribosomes, based on co-purification experiments; green fluorescent protein (GFP)-fusion protein localizes to the cytoplasm in a punctate pattern"	-	-	-	-	9	-	-	-	-	-	-	-	-	1
	GGA2	GGA2 SGDID:S000001150, Chr VIII from 328303-330060, Genome Release 64-2-1, Verified ORF, "Protein that regulates Arf1p, Arf2p to facilitate Golgi trafficking; binds phosphatidylinositol 4-phosphate, which plays a role in TGN localization; has homology to gamma-adaptin; GGA2 has a paralog, GGA1, that arose from the whole genome duplication"	-	-	-	-	9	-	-	-	-	-	-	-	-	1
	RPL17A	RPL17A SGDID:S000001663, Chr XI from 109269-109577,109884-110129, Genome Release 64-2-1, Verified ORF, "Ribosomal 60S subunit protein L17A; copurifies with the Dam1 complex (aka DASH complex); homologous to mammalian ribosomal protein L17 and bacterial L22; RPL17A has a paralog, RPL17B, that arose from the whole genome duplication; protein abundance increases in response to DNA replication stress"	-	-	-	-	12	-	-	-	-	-	-	-	-	1
	CFT2	CFT2 SGDID:S000004105, Chr XII from 377985-380564, Genome Release 64-2-1, Verified ORF, "Subunit of the mRNA cleavage and polyadenlylation factor (CPF); required for pre-mRNA cleavage, polyadenylation and poly(A) site recognition, 43% similarity with the mammalian CPSF-100 protein."	-	-	-	-	9	-	-	-	-	-	-	-	-	1
	GDT1	GDT1 SGDID:S000000391, Chr II from 602634-603476, Genome Release 64-2-1, Verified ORF, "Protein of unknown function involved in calcium homeostasis; localizes to the cis- and medial-Golgi apparatus; GFP-fusion protein localizes to the vacuole; TMEM165, a human gene which causes Congenital Disorders of Glycosylation is orthologous and functionally complements the null allele; expression pattern an…	-	-	-	-	7	-	-	-	-	-	-	-	-	1
	HXT11	HXT11 SGDID:S000005516, Chr XV from 25273-26976, Genome Release 64-2-1, Verified ORF, "Putative hexose transporter that is nearly identical to Hxt9p; has similarity to major facilitator superfamily (MFS) transporters and is involved in pleiotropic drug resistance"	-	-	-	-	7	-	-	-	-	-	-	-	-	1
	RPT5	RPT5 SGDID:S000005643, Chr XV from 545029-546333, Genome Release 64-2-1, Verified ORF, "ATPase of the 19S regulatory particle of the 26S proteasome; one of six ATPases of the regulatory particle; involved in the degradation of ubiquitinated substrates; recruited to the GAL1-10 promoter region upon induction of transcription; similar to human TBP1"	-	-	-	-	6	-	-	-	-	-	-	-	-	1
	MNN2	MNN2 SGDID:S000000219, Chr II from 269503-267710, Genome Release 64-2-1, reverse complement, Verified ORF, "Alpha-1,2-mannosyltransferase; responsible for addition of the first alpha-1,2-linked mannose to form the branches on the mannan backbone of oligosaccharides, localizes to an early Golgi compartment"	-	-	-	-	-	23	-	-	-	-	-	-	-	1
	NEO1	NEO1 SGDID:S000001310, Chr IX from 261437-264892, Genome Release 64-2-1, Verified ORF, "Putative aminophospholipid translocase (flippase); involved in endocytosis and vacuolar biogenesis; localizes to endosomes and the Golgi aparatus"	-	-	-	-	-	17	-	-	-	-	-	-	-	1
	DAP2	DAP2 SGDID:S000001070, Chr VIII from 167434-164978, Genome Release 64-2-1, reverse complement, Verified ORF, "Dipeptidyl aminopeptidase; synthesized as a glycosylated precursor; localizes to the vacuolar membrane; similar to Ste13p"	-	-	-	-	-	20	-	-	-	-	-	-	-	1
	AKR1	AKR1 SGDID:S000002672, Chr IV from 998323-996029, Genome Release 64-2-1, reverse complement, Verified ORF, "Palmitoyl transferase involved in protein palmitoylation; acts as a negative regulator of pheromone response pathway; required for endocytosis of pheromone receptors; involved in cell shape control; contains ankyrin repeats; AKR1 has a paralog, AKR2, that arose from the whole genome duplica…	-	-	-	-	-	14	-	-	-	-	-	-	-	1
	APE3	APE3 SGDID:S000000490, Chr II from 774700-776313, Genome Release 64-2-1, Verified ORF, "Vacuolar aminopeptidase Y; processed to mature form by Prb1p"	-	-	-	-	-	14	-	-	-	-	-	-	-	1
	MCR1	MCR1 SGDID:S000001633, Chr XI from 166544-167452, Genome Release 64-2-1, Verified ORF, "Mitochondrial NADH-cytochrome b5 reductase; involved in ergosterol biosynthesis"	-	-	-	-	-	11	-	-	-	-	-	-	-	1
	MNL2	MNL2 SGDID:S000004047, Chr XII from 255306-257855, Genome Release 64-2-1, Verified ORF, "Putative mannosidase involved in ER-associated protein degradation; localizes to the endoplasmic reticulum; sequence similarity with seven-hairpin glycosidase (GH47) family members, such as Mns1p and Mnl1p, that hydrolyze 1,2-linked alpha-D-mannose residues; non-essential gene"	-	-	-	-	-	10	-	-	-	-	-	-	-	1
	AMS1	AMS1 SGDID:S000003124, Chr VII from 210416-213667, Genome Release 64-2-1, Verified ORF, "Vacuolar alpha mannosidase; involved in free oligosaccharide (fOS) degradation; delivered to the vacuole in a novel pathway separate from the secretory pathway"	-	-	-	-	-	12	-	-	-	-	-	-	-	1
	PRC1	PRC1 SGDID:S000004912, Chr XIII from 861922-863520, Genome Release 64-2-1, Verified ORF, "Vacuolar carboxypeptidase Y (proteinase C, CPY); broad-specificity C-terminal exopeptidase involved in non-specific protein degradation in the vacuole; member of the serine carboxypeptidase family"	-	-	-	-	-	9	-	-	-	-	-	-	-	1
	OSM1	OSM1 SGDID:S000003812, Chr X from 529861-531366, Genome Release 64-2-1, Verified ORF, "Fumarate reductase, catalyzes the reduction of fumarate to succinate; required for the reoxidation of intracellular NADH under anaerobic conditions; mutations cause osmotic sensitivity; OSM1 has a paralog, FRD1, that arose from the whole genome duplication"	-	-	-	-	-	9	-	-	-	-	-	-	-	1
	YMR221C	YMR221C SGDID:S000004834, Chr XIII from 715445-713931, Genome Release 64-2-1, reverse complement, Uncharacterized ORF, "Putative protein of unknown function; the authentic, non-tagged protein is detected in highly purified mitochondria in high-throughput studies; physical interaction with Atg27p suggests a possible role in autophagy"	-	-	-	-	-	9	-	-	-	-	-	-	-	1
	RPL36A	RPL36A SGDID:S000004807, Chr XIII from 651145-651160,651624-651910, Genome Release 64-2-1, Verified ORF, "Ribosomal 60S subunit protein L36A; N-terminally acetylated; binds to 5.8 S rRNA; homologous to mammalian ribosomal protein L36, no bacterial homolog; RPL36A has a paralog, RPL36B, that arose from the whole genome duplication"	-	-	-	-	-	9	-	-	-	-	-	-	-	1
	DNF3	DNF3 SGDID:S000004772, Chr XIII from 583921-578951, Genome Release 64-2-1, reverse complement, Verified ORF, "Trans-golgi network aminophospholipid translocase (flippase); maintains membrane lipid asymmetry in post-Golgi secretory vesicles; localizes to the trans-Golgi network; likely involved in protein transport; type 4 P-type ATPase"	-	-	-	-	-	9	-	-	-	-	-	-	-	1
	YJL171C	YJL171C SGDID:S000003707, Chr X from 100894-99704, Genome Release 64-2-1, reverse complement, Verified ORF, "GPI-anchored cell wall protein of unknown function; induced in response to cell wall damaging agents and by mutations in genes involved in cell wall biogenesis; sequence similarity to YBR162C/TOS1, a covalently bound cell wall protein; protein abundance increases in response to DNA replica…	-	-	-	-	-	8	-	-	-	-	-	-	-	1
	PHO90	PHO90 SGDID:S000003734, Chr X from 60844-63489, Genome Release 64-2-1, Verified ORF, "Low-affinity phosphate transporter; acts upstream of Pho81p in regulation of the PHO pathway; deletion of pho84, pho87, pho89, pho90, and pho91 causes synthetic lethality; transcription independent of Pi and Pho4p activity; overexpression results in vigorous growth; PHO90 has a paralog, PHO87, that arose from th…	-	-	-	-	-	7	-	-	-	-	-	-	-	1
	DCR2	DCR2 SGDID:S000004353, Chr XII from 849124-847388, Genome Release 64-2-1, reverse complement, Verified ORF, "Phosphoesterase; involved in downregulation of the unfolded protein response (UPR), at least in part via dephosphorylation of Ire1p; dosage-dependent positive regulator of the G1/S phase transition through control of the timing of START"	-	-	-	-	-	7	-	-	-	-	-	-	-	1
	TGL3	TGL3 SGDID:S000004930, Chr XIII from 901307-899379, Genome Release 64-2-1, reverse complement, Verified ORF, "Bifunctional triacylglycerol lipase and LPE acyltransferase; major lipid particle-localized triacylglycerol (TAG) lipase; catalyzes acylation of lysophosphatidylethanolamine (LPE), a function which is essential for sporulation; protein level and stability of Tgl3p are markedly reduced in …	-	-	-	-	-	6	-	-	-	-	-	-	-	1
	MRL1	MRL1 SGDID:S000006283, Chr XVI from 698869-700014, Genome Release 64-2-1, Verified ORF, "Membrane protein; has similarity to mammalian mannose-6-phosphate receptors; possibly functions as a sorting receptor in the delivery of vacuolar hydrolases; protein abundance increases in response to DNA replication stress"	-	-	-	-	-	6	-	-	-	-	-	-	-	1
	ARO8	ARO8 SGDID:S000003170, Chr VII from 116059-117561, Genome Release 64-2-1, Verified ORF, "Aromatic aminotransferase I; expression is regulated by general control of amino acid biosynthesis"	-	-	-	-	-	6	-	-	-	-	-	-	-	1
	LYP1	LYP1 SGDID:S000005212, Chr XIV from 138550-140385, Genome Release 64-2-1, Verified ORF, "Lysine permease; one of three amino acid permeases (Alp1p, Can1p, Lyp1p) responsible for uptake of cationic amino acids"	-	-	-	-	-	6	-	-	-	-	-	-	-	1
	FRE4	FRE4 SGDID:S000005343, Chr XIV from 739951-742110, Genome Release 64-2-1, Verified ORF, "Ferric reductase; reduces a specific subset of siderophore-bound iron prior to uptake by transporters; expression induced by low iron levels"	-	-	-	-	-	6	-	-	-	-	-	-	-	1
	VMA1	VMA1 SGDID:S000002344, Chr IV from 126787-130002, Genome Release 64-2-1, Verified ORF, "Subunit A of the V1 peripheral membrane domain of V-ATPase; protein precursor undergoes self-catalyzed splicing to yield the extein Tfp1p and the intein Vde (PI-SceI), which is a site-specific endonuclease; the V1 peripheral membrane domain of the vacuolar H+-ATPase (V-ATPase) has eight subunits; involved in m…	-	-	-	-	-	-	47	-	-	-	-	-	-	1
	SSB2	SSB2 SGDID:S000005153, Chr XIV from 252059-253900, Genome Release 64-2-1, Verified ORF, "Cytoplasmic ATPase that is a ribosome-associated molecular chaperone; functions with J-protein partner Zuo1p; may be involved in the folding of newly-synthesized polypeptide chains; member of the HSP70 family; SSB2 has a paralog, SSB1, that arose from the whole genome duplication"	-	-	-	-	-	-	71	-	-	-	-	-	-	1
	CCT4	CCT4 SGDID:S000002302, Chr IV from 199996-201582, Genome Release 64-2-1, Verified ORF, "Subunit of the cytosolic chaperonin Cct ring complex; related to Tcp1p, required for the assembly of actin and tubulins in vivo"	-	-	-	-	-	-	20	-	-	-	-	-	-	1
	NUG1	NUG1 SGDID:S000000808, Chr V from 162723-164285, Genome Release 64-2-1, Verified ORF, "GTPase that associates with nuclear 60S pre-ribosomes; required for export of 60S ribosomal subunits from the nucleus"	-	-	-	-	-	-	17	-	-	-	-	-	-	1
	RPL8A	RPL8A SGDID:S000001025, Chr VIII from 36025-35255, Genome Release 64-2-1, reverse complement, Verified ORF, "Ribosomal 60S subunit protein L8A; required for processing of 27SA3 pre-rRNA to 27SB pre-rRNA during assembly of large ribosomal subunit; depletion leads to a turnover of pre-rRNA; L8 binds to Domain I of 25S and 5.8 S rRNAs; mutation results in decreased amounts of free 60S subunits; homo…	-	-	-	-	-	-	25	-	-	-	-	-	-	1
	TRP5	TRP5 SGDID:S000002994, Chr VII from 448535-446412, Genome Release 64-2-1, reverse complement, Verified ORF, "Tryptophan synthase; catalyzes the last step of tryptophan biosynthesis; regulated by the general control system of amino acid biosynthesis"	-	-	-	-	-	-	16	-	-	-	-	-	-	1
	KAP95	KAP95 SGDID:S000004339, Chr XII from 826413-823828, Genome Release 64-2-1, reverse complement, Verified ORF, "Karyopherin beta; forms a complex with Srp1p/Kap60p; interacts with nucleoporins to mediate nuclear import of NLS-containing cargo proteins via the nuclear pore complex; regulates PC biosynthesis; GDP-to-GTP exchange factor for Gsp1p"	-	-	-	-	-	-	14	-	-	-	-	-	-	1
	YDR341C	YDR341C SGDID:S000002749, Chr IV from 1153626-1151803, Genome Release 64-2-1, reverse complement, Verified ORF, "Arginyl-tRNA synthetase; the authentic, non-tagged protein is detected in highly purified mitochondria in high-throughput studies; YDR341C has a paralog, MSR1, that arose from the whole genome duplication"	-	-	-	-	-	-	14	-	-	-	-	-	-	1
	HOG1	HOG1 SGDID:S000004103, Chr XII from 371620-372927, Genome Release 64-2-1, Verified ORF, "Mitogen-activated protein kinase involved in osmoregulation; controls global reallocation of RNAPII in osmotic shock; activates CDC28 by stimulating antisense RNA transcription; mediates recruitment/activation of RNAPII at Hot1p-dependent promoters; with Mrc1p defines novel S-phase checkpoint that prevent con…	-	-	-	-	-	-	12	-	-	-	-	-	-	1
	RLI1	RLI1 SGDID:S000002498, Chr IV from 628534-626708, Genome Release 64-2-1, reverse complement, Verified ORF, "Essential Fe-S protein; required for ribosome biogenesis, translation initiation/termination; facilitates binding of multifactor complex (MFC) of initiation factors to small ribosomal subunit; Dom34-Hbs1 complex and Rli1p work in dissociating inactive ribosomes, thereby facilitating transla…	-	-	-	-	-	-	12	-	-	-	-	-	-	1
	ARP3	ARP3 SGDID:S000003826, Chr X from 559158-557809, Genome Release 64-2-1, reverse complement, Verified ORF, "Essential component of the Arp2/3 complex; Arp2/3 is a highly conserved actin nucleation center required for the motility and integrity of actin patches; involved in endocytosis and membrane growth and polarity"	-	-	-	-	-	-	11	-	-	-	-	-	-	1
	ERG7	ERG7 SGDID:S000001114, Chr VIII from 239098-241293, Genome Release 64-2-1, Verified ORF, "Lanosterol synthase; an essential enzyme that catalyzes the cyclization of squalene 2,3-epoxide, a step in ergosterol biosynthesis"	-	-	-	-	-	-	10	-	-	-	-	-	-	1
	UTP7	UTP7 SGDID:S000000884, Chr V from 325936-324272, Genome Release 64-2-1, reverse complement, Verified ORF, "Nucleolar protein; component of the small subunit (SSU) processome containing the U3 snoRNA that is involved in processing of pre-18S rRNA"	-	-	-	-	-	-	10	-	-	-	-	-	-	1
	PUF6	PUF6 SGDID:S000002904, Chr IV from 1443403-1441433, Genome Release 64-2-1, reverse complement, Verified ORF, "Pumilio-homology domain protein; binds the 3' UTR of ASH1 mRNA and represses its translation, resulting in proper asymmetric localization of ASH1 mRNA; required at post-transcriptional step for efficient retrotransposition; absence results in decreased Ty1 Gag:GFP protein levels; co-sedim…	-	-	-	-	-	-	10	-	-	-	-	-	-	1
	EXO84	EXO84 SGDID:S000000306, Chr II from 447323-445062, Genome Release 64-2-1, reverse complement, Verified ORF, "Exocyst subunit with dual roles in exocytosis and spliceosome assembly; subunit of the the exocyst complex which mediates polarized targeting and tethering of post-Golgi secretory vesicles to active sites of exocytosis at the plasma membrane (PM) prior to SNARE-mediated fusion; required fo…	-	-	-	-	-	-	9	-	-	-	-	-	-	1
	SRP72	SRP72 SGDID:S000006131, Chr XVI from 156212-154290, Genome Release 64-2-1, reverse complement, Verified ORF, "Core component of the signal recognition particle (SRP); the SRP is a ribonucleoprotein (RNP) complex that functions in targeting nascent secretory proteins to the endoplasmic reticulum (ER) membrane"	-	-	-	-	-	-	8	-	-	-	-	-	-	1
	CKI1	CKI1 SGDID:S000004123, Chr XII from 408445-410193, Genome Release 64-2-1, Verified ORF, "Choline kinase; catalyzes the first step in phosphatidylcholine synthesis via the CDP-choline (Kennedy pathway); exhibits some ethanolamine kinase activity contributing to phosphatidylethanolamine synthesis via the CDP-ethanolamine pathway; CKI1 has a paralog, EKI1, that arose from the whole genome duplicatio…	-	-	-	-	-	-	8	-	-	-	-	-	-	1
	YPK2	YPK2 SGDID:S000004710, Chr XIII from 475453-473420, Genome Release 64-2-1, reverse complement, Verified ORF, "Protein kinase similar to serine/threonine protein kinase Ypk1p; functionally redundant with YPK1 at the genetic level; participates in a signaling pathway required for optimal cell wall integrity; homolog of mammalian kinase SGK; YPK2 has a paralog, YPK1, that arose from the whole genome…	-	-	-	-	-	-	7	-	-	-	-	-	-	1
	UTP9	UTP9 SGDID:S000001239, Chr VIII from 491931-493658, Genome Release 64-2-1, Verified ORF, "Nucleolar protein; component of the small subunit (SSU) processome containing the U3 snoRNA that is involved in processing of pre-18S rRNA"	-	-	-	-	-	-	7	-	-	-	-	-	-	1
	YPK3	YPK3 SGDID:S000000232, Chr II from 296002-294425, Genome Release 64-2-1, reverse complement, Verified ORF, "AGC kinase; phosphorylated by cAMP-dependent protein kinase (PKA) in a TORC1-dependent manner"	-	-	-	-	-	-	6	-	-	-	-	-	-	1
	SUI1	SUI1 SGDID:S000005188, Chr XIV from 187496-187170, Genome Release 64-2-1, reverse complement, Verified ORF, "Translation initiation factor eIF1; component of a complex involved in recognition of the initiator codon; modulates translation accuracy at the initiation phase"	-	-	-	-	-	-	6	-	-	-	-	-	-	1
	POB3	POB3 SGDID:S000004534, Chr XIII from 135500-137158, Genome Release 64-2-1, Verified ORF, "Subunit of the heterodimeric FACT complex (Spt16p-Pob3p); FACT associates with chromatin via interaction with Nhp6Ap and Nhp6Bp, and reorganizes nucleosomes to facilitate access to DNA by RNA and DNA polymerases; protein abundance increases in response to DNA replication stress"	-	-	-	-	-	-	6	-	-	-	-	-	-	1
	PTC3	PTC3 SGDID:S000000152, Chr II from 113762-115168, Genome Release 64-2-1, Verified ORF, "Type 2C protein phosphatase (PP2C); dephosphorylates Hog1p (see also Ptc2p) to limit maximal kinase activity induced by osmotic stress; dephosphorylates T169 phosphorylated Cdc28p (see also Ptc2p); role in DNA damage checkpoint inactivation; PTC3 has a paralog, PTC2, that arose from the whole genome duplicatio…	-	-	-	-	-	-	6	-	-	-	-	-	-	1
	UTP25	UTP25 SGDID:S000001353, Chr IX from 193195-191030, Genome Release 64-2-1, reverse complement, Verified ORF, "Nucleolar protein; required for 35S pre-RNA processing and 40S ribosomal subunit biogenesis"	-	-	-	-	-	-	6	-	-	-	-	-	-	1
	NOP6	NOP6 SGDID:S000002372, Chr IV from 77966-77289, Genome Release 64-2-1, reverse complement, Verified ORF, "rRNA-binding protein required for 40S ribosomal subunit biogenesis; contains an RNA recognition motif (RRM); hydrophilin essential to overcome the stress of the desiccation-rehydration process; NOP6 may be a fungal-specific gene as no homologs have been yet identified in higher eukaryotes"	-	-	-	-	-	-	6	-	-	-	-	-	-	1
	ROK1	ROK1 SGDID:S000003139, Chr VII from 182390-184084, Genome Release 64-2-1, Verified ORF, "RNA-dependent ATPase; involved in pre-rRNA processing at sites A0, A1, and A2, and in control of cell cycle progression; contains two upstream open reading frames (uORFs) in 5' untranslated region which regulate translation"	-	-	-	-	-	-	-	13	-	-	-	-	-	1
	HRR25	HRR25 SGDID:S000006125, Chr XVI from 164276-165760, Genome Release 64-2-1, Verified ORF, "Protein kinase; involved in regulating diverse events including vesicular trafficking, DNA repair, and chromosome segregation; binds the CTD of RNA pol II; phosphorylates the COPII coat; phosphorylates Tif6p which plays a critical role in 60S ribosomal subunit biogenesis; interacts with Sit4p phosphatase; ho…	-	-	-	-	-	-	-	11	-	-	-	-	-	1
	YTM1	YTM1 SGDID:S000005798, Chr XV from 832813-834195, Genome Release 64-2-1, Verified ORF, "Constituent of 66S pre-ribosomal particles; forms a complex with Nop7p and Erb1p that is required for maturation of the large ribosomal subunit; has seven C-terminal WD repeats"	-	-	-	-	-	-	-	11	-	-	-	-	-	1
	GLE2	GLE2 SGDID:S000000909, Chr V from 374545-373448, Genome Release 64-2-1, reverse complement, Verified ORF, "RNA export factor associated with the nuclear pore complex (NPC); associates with NUP116p; required for polyadenylated RNA export but not for protein import; homologous to S. pombe Rae1p and human RAE1"	-	-	-	-	-	-	-	10	-	-	-	-	-	1
	SMF3	SMF3 SGDID:S000004024, Chr XII from 211933-210512, Genome Release 64-2-1, reverse complement, Verified ORF, "Putative divalent metal ion transporter involved in iron homeostasis; transcriptionally regulated by metal ions; member of the Nramp family of metal transport proteins; protein abundance increases in response to DNA replication stress"	-	-	-	-	-	-	-	10	-	-	-	-	-	1
	NHP2	NHP2 SGDID:S000002367, Chr IV from 87512-87982, Genome Release 64-2-1, Verified ORF, "Protein related to mammalian high mobility group (HMG) proteins; nuclear protein; essential for function of H/ACA-type snoRNPs, which are involved in 18S rRNA processing"	-	-	-	-	-	-	-	9	-	-	-	-	-	1
	GPA2	GPA2 SGDID:S000000822, Chr V from 195168-196517, Genome Release 64-2-1, Verified ORF, "Nucleotide binding alpha subunit of the heterotrimeric G protein; interacts with the receptor Gpr1p, has signaling role in response to nutrients; required for the recruitment of Ras-GTP at the plasma membrane and in the nucleus"	-	-	-	-	-	-	-	8	-	-	-	-	-	1
	UGP1	UGP1 SGDID:S000001518, Chr XI from 369891-371390, Genome Release 64-2-1, Verified ORF, "UDP-glucose pyrophosphorylase (UGPase); catalyses the reversible formation of UDP-Glc from glucose 1-phosphate and UTP, involved in a wide variety of metabolic pathways, expression modulated by Pho85p through Pho4p; UGP1 has a paralog, YHL012W, that arose from the whole genome duplication"	-	-	-	-	-	-	-	8	-	-	-	-	-	1
	NOC4	NOC4 SGDID:S000006348, Chr XVI from 821423-819765, Genome Release 64-2-1, reverse complement, Verified ORF, "Nucleolar protein; forms a complex with Nop14p that mediates maturation and nuclear export of 40S ribosomal subunits; relocalizes to the cytosol in response to hypoxia"	-	-	-	-	-	-	-	7	-	-	-	-	-	1
	NUS1	NUS1 SGDID:S000002352, Chr IV from 114672-115799, Genome Release 64-2-1, Verified ORF, "Putative prenyltransferase; required for cell viability; proposed to be involved in protein trafficking because tet-repressible mutant shows accumulation of hypoglycosylated forms of CPY"	-	-	-	-	-	-	-	6	-	-	-	-	-	1
	MKK1	MKK1 SGDID:S000005757, Chr XV from 772601-774127, Genome Release 64-2-1, Verified ORF, "MAPKK involved in the protein kinase C signaling pathway; involved in control of cell integrity; upon activation by Bck1p phosphorylates downstream target, Slt2p; functionally redundant with Mkk2p; MKK1 has a paralog, MKK2, that arose from the whole genome duplication"	-	-	-	-	-	-	-	6	-	-	-	-	-	1
	COS1	COS1 SGDID:S000005280, Chr XIV from 8330-9475, Genome Release 64-2-1, Verified ORF, "Protein of unknown function; member of the DUP380 subfamily of conserved, often subtelomerically-encoded proteins"	-	-	-	-	-	-	-	6	-	-	-	-	-	1
	DBP3	DBP3 SGDID:S000003046, Chr VII from 361859-360288, Genome Release 64-2-1, reverse complement, Verified ORF, "RNA-Dependent ATPase, member of DExD/H-box family; involved in cleavage of site A3 within the ITS1 spacer during rRNA processing; not essential for growth, but deletion causes severe slow-growth phenotype"	-	-	-	-	-	-	-	-	25	-	-	-	-	1
	CBF5	CBF5 SGDID:S000004165, Chr XII from 506134-507585, Genome Release 64-2-1, Verified ORF, "Pseudouridine synthase catalytic subunit of box H/ACA snoRNPs; acts on large and small rRNAs, on snRNA U2, and on some mRNAs; mutations in human ortholog dyskerin cause the disorder dyskeratosis congenita; small nucleolar ribonucleoprotein particles are also known as snoRNPs"	-	-	-	-	-	-	-	-	25	-	-	-	-	1
	SUP35	SUP35 SGDID:S000002579, Chr IV from 808324-810381, Genome Release 64-2-1, Verified ORF, "Translation termination factor eRF3; has a role in mRNA deadenylation and decay; altered protein conformation creates the [PSI(+)] prion that modifies cellular fitness, alters translational fidelity by affecting reading frame selection, and results in a nonsense suppressor phenotype; many stress-response gene…	-	-	-	-	-	-	-	-	29	-	-	-	-	1
	MOT1	MOT1 SGDID:S000006003, Chr XVI from 404083-398480, Genome Release 64-2-1, reverse complement, Verified ORF, "Essential protein involved in regulation of transcription; removes Spt15p (TBP) from DNA via its C-terminal ATPase activity; may have a role in ensuring that soluble TBP is available to bind TATA-less promoters; forms a complex with TBP that binds TATA DNA with high affinity but with alter…	-	-	-	-	-	-	-	-	17	-	-	-	-	1
	LIA1	LIA1 SGDID:S000003831, Chr X from 570598-569621, Genome Release 64-2-1, reverse complement, Verified ORF, "Deoxyhypusine hydroxylase; HEAT-repeat containing metalloenzyme that catalyzes hypusine formation; binds to and is required for the modification of Hyp2p (eIF5A); complements S. pombe mmd1 mutants defective in mitochondrial positioning; protein abundance increases in response to DNA replicat…	-	-	-	-	-	-	-	-	14	-	-	-	-	1
	NOP7	NOP7 SGDID:S000003335, Chr VII from 695417-697234, Genome Release 64-2-1, Verified ORF, "Component of several different pre-ribosomal particles; forms a complex with Ytm1p and Erb1p that is required for maturation of the large ribosomal subunit; required for exit from G<sub>0</sub> and the initiation of cell proliferation"	-	-	-	-	-	-	-	-	13	-	-	-	-	1
	MCM2	MCM2 SGDID:S000000119, Chr II from 177526-174920, Genome Release 64-2-1, reverse complement, Verified ORF, "Protein involved in DNA replication; component of the Mcm2-7 hexameric helicase complex that binds chromatin as a part of the pre-replicative complex; relative distribution to the nucleus increases upon DNA replication stress"	-	-	-	-	-	-	-	-	14	-	-	-	-	1
	IMD4	IMD4 SGDID:S000004520, Chr XIII from 163308-162194,164176-163717, Genome Release 64-2-1, reverse complement, Verified ORF, "Inosine monophosphate dehydrogenase; catalyzes the rate-limiting step in the de novo synthesis of GTP; member of a four-gene family in S. cerevisiae, constitutively expressed; IMD4 has a paralog, IMD3, that arose from the whole genome duplication"	-	-	-	-	-	-	-	-	14	-	-	-	-	1
	RIP1	RIP1 SGDID:S000000750, Chr V from 107260-107907, Genome Release 64-2-1, Verified ORF, "Ubiquinol-cytochrome-c reductase; a Rieske iron-sulfur protein of the mitochondrial cytochrome bc1 complex; transfers electrons from ubiquinol to cytochrome c1 during respiration; during import, Rip1p is first imported into the mitochondrial matrix where it is processed, acquires its Fe-S cluster, and is folded…	-	-	-	-	-	-	-	-	10	-	-	-	-	1
	RAX1	RAX1 SGDID:S000005827, Chr XV from 880965-882272, Genome Release 64-2-1, Verified ORF, "Protein involved in bud site selection during bipolar budding; localization requires Rax2p; has similarity to members of the insulin-related peptide superfamily"	-	-	-	-	-	-	-	-	8	-	-	-	-	1
	RLF2	RLF2 SGDID:S000006222, Chr XVI from 594476-596296, Genome Release 64-2-1, Verified ORF, "Largest subunit (p90) of the Chromatin Assembly Complex (CAF-1); chromatin assembly by CAF-1 is important for multiple processes including silencing at telomeres, mating type loci, and rDNA; maintenance of kinetochore structure; deactivation of the DNA damage checkpoint after DNA repair; chromatin dynamics du…	-	-	-	-	-	-	-	-	8	-	-	-	-	1
	RRS1	RRS1 SGDID:S000005820, Chr XV from 868340-868951, Genome Release 64-2-1, Verified ORF, "Essential protein that binds ribosomal protein L11; required for nuclear export of the 60S pre-ribosomal subunit during ribosome biogenesis; localizes to the nucleolus and in foci along nuclear periphery; cooperates with Ebp2p and Mps3p to mediate telomere clustering by binding Sir4p, but is not involved in te…	-	-	-	-	-	-	-	-	9	-	-	-	-	1
	HSL1	HSL1 SGDID:S000001584, Chr XI from 248920-253476, Genome Release 64-2-1, Verified ORF, "Nim1p-related protein kinase; regulates the morphogenesis and septin checkpoints; associates with the assembled septin filament; required along with Hsl7p for bud neck recruitment, phosphorylation, and degradation of Swe1p"	-	-	-	-	-	-	-	-	8	-	-	-	-	1
	PRE6	PRE6 SGDID:S000005398, Chr XV from 255337-256101, Genome Release 64-2-1, Verified ORF, "Alpha 4 subunit of the 20S proteasome; may replace alpha 3 subunit (Pre9p) under stress conditions to create a more active proteasomal isoform; GFP-fusion protein relocates from cytosol to the mitochondrial surface upon oxidative stress"	-	-	-	-	-	-	-	-	8	-	-	-	-	1
	OPI3	OPI3 SGDID:S000003834, Chr X from 572935-572315, Genome Release 64-2-1, reverse complement, Verified ORF, "Methylene-fatty-acyl-phospholipid synthase; catalyzes the last two steps in phosphatidylcholine biosynthesis; also known as phospholipid methyltransferase"	-	-	-	-	-	-	-	-	7	-	-	-	-	1
	NST1	NST1 SGDID:S000005035, Chr XIV from 452408-456130, Genome Release 64-2-1, Verified ORF, "Protein of unknown function; mediates sensitivity to salt stress; interacts physically with the splicing factor Msl1p and also displays genetic interaction with MSL1"	-	-	-	-	-	-	-	-	7	-	-	-	-	1
	KSS1	KSS1 SGDID:S000003272, Chr VII from 575398-576504, Genome Release 64-2-1, Verified ORF, "Mitogen-activated protein kinase (MAPK); involved in signal transduction pathways that control filamentous growth and pheromone response; the KSS1 gene is nonfunctional in S288C strains and functional in W303 strains"	-	-	-	-	-	-	-	-	6	-	-	-	-	1
	YGL036W	YGL036W SGDID:S000003004, Chr VII from 428601-431330, Genome Release 64-2-1, Uncharacterized ORF, "Putative protein of unknown function; green fluorescent protein (GFP)-fusion protein localizes to the cytoplasm; YGL036W is not an essential gene"	-	-	-	-	-	-	-	-	6	-	-	-	-	1
	PDR15	PDR15 SGDID:S000002814, Chr IV from 1279210-1283799, Genome Release 64-2-1, Verified ORF, "Plasma membrane ATP binding cassette (ABC) transporter; multidrug transporter and general stress response factor implicated in cellular detoxification; regulated by Pdr1p, Pdr3p and Pdr8p; promoter contains a PDR responsive element; PDR15 has a paralog, PDR5, that arose from the whole genome duplication"	-	-	-	-	-	-	-	-	6	-	-	-	-	1
	CDC123	CDC123 SGDID:S000004205, Chr XII from 571858-570776, Genome Release 64-2-1, reverse complement, Verified ORF, "Protein involved in nutritional control of the cell cycle; regulates abundance of the translation initiation factor eIF2; ortholog of human D123 protein"	-	-	-	-	-	-	-	-	6	-	-	-	-	1
	DED1	DED1 SGDID:S000005730, Chr XV from 722911-724725, Genome Release 64-2-1, Verified ORF, "ATP-dependent DEAD (Asp-Glu-Ala-Asp)-box RNA helicase; required for translation initiation of all yeast mRNAs; binds to mRNA cap-associated factors, and binding stimulates Ded1p RNA-dependent ATPase activity; mutation in human homolog DBY is associated with male infertility; human homolog DDX3X complements ded…	-	-	-	-	-	-	-	-	-	67	-	-	-	1
	FUN12	FUN12 SGDID:S000000033, Chr I from 76427-79435, Genome Release 64-2-1, Verified ORF, "Translation initiation factor eIF5B; GTPase that promotes Met-tRNAiMet binding to ribosomes and ribosomal subunit joining; promotes GTP-dependent maturation of 18S rRNA by Nob1p; protein abundance increases in response to DNA replication stress; homolog of bacterial IF2"	-	-	-	-	-	-	-	-	-	29	-	-	-	1
	MAE1	MAE1 SGDID:S000001512, Chr XI from 384725-382716, Genome Release 64-2-1, reverse complement, Verified ORF, "Mitochondrial malic enzyme; catalyzes the oxidative decarboxylation of malate to pyruvate, which is a key intermediate in sugar metabolism and a precursor for synthesis of several amino acids"	-	-	-	-	-	-	-	-	-	31	-	-	-	1
	TCB3	TCB3 SGDID:S000004537, Chr XIII from 129367-124730, Genome Release 64-2-1, reverse complement, Verified ORF, "Cortical ER protein involved in ER-plasma membrane tethering; one of 6 proteins (Ist2p, Scs2p, Scs22p, Tcb1p, Tcb2p, Tcb3p) that connect ER to the plasma membrane (PM) and regulate PM phosphatidylinositol-4-phosphate (PI4P) levels by controlling access of Sac1p phosphatase to its substrat…	-	-	-	-	-	-	-	-	-	28	-	-	-	1
	HEF3	HEF3 SGDID:S000004959, Chr XIV from 606319-609453, Genome Release 64-2-1, Verified ORF, "Translational elongation factor EF-3; member of the ABC superfamily; stimulates EF-1 alpha-dependent binding of aminoacyl-tRNA by the ribosome; normally expressed in zinc deficient cells; HEF3 has a paralog, YEF3, that arose from the whole genome duplication"	-	-	-	-	-	-	-	-	-	40	-	-	-	1
	RPP0	RPP0 SGDID:S000004332, Chr XII from 805887-806825, Genome Release 64-2-1, Verified ORF, "Conserved ribosomal protein P0 of the ribosomal stalk; involved in interaction between translational elongation factors and the ribosome; phosphorylated on serine 302; homologous to mammalian ribosomal protein LP0 and bacterial L10"	-	-	-	-	-	-	-	-	-	33	-	-	-	1
	MCM6	MCM6 SGDID:S000003169, Chr VII from 120907-117854, Genome Release 64-2-1, reverse complement, Verified ORF, "Protein involved in DNA replication; component of the Mcm2-7 hexameric helicase complex that binds chromatin as a part of the pre-replicative complex; forms a subcomplex with Mcm4p and Mcm7p"	-	-	-	-	-	-	-	-	-	19	-	-	-	1
	RPO21	RPO21 SGDID:S000002299, Chr IV from 210561-205360, Genome Release 64-2-1, reverse complement, Verified ORF, "RNA polymerase II largest subunit B220; part of central core; phosphorylation of C-terminal heptapeptide repeat domain regulates association with transcription and splicing factors; similar to bacterial beta-prime"	-	-	-	-	-	-	-	-	-	20	-	-	-	1
	NCP1	NCP1 SGDID:S000001084, Chr VIII from 190543-192618, Genome Release 64-2-1, Verified ORF, "NADP-cytochrome P450 reductase; involved in ergosterol biosynthesis; associated and coordinately regulated with Erg11p"	-	-	-	-	-	-	-	-	-	18	-	-	-	1
	HEM1	HEM1 SGDID:S000002640, Chr IV from 927452-929098, Genome Release 64-2-1, Verified ORF, "5-aminolevulinate synthase; catalyzes the first step in the heme biosynthetic pathway; an N-terminal signal sequence is required for localization to the mitochondrial matrix; expression is regulated by Hap2p-Hap3p"	-	-	-	-	-	-	-	-	-	16	-	-	-	1
	ERG27	ERG27 SGDID:S000004090, Chr XII from 341810-342853, Genome Release 64-2-1, Verified ORF, "3-keto sterol reductase; catalyzes the last of three steps required to remove two C-4 methyl groups from an intermediate in ergosterol biosynthesis; mutants are sterol auxotrophs"	-	-	-	-	-	-	-	-	-	19	-	-	-	1
	ERG11	ERG11 SGDID:S000001049, Chr VIII from 121683-120091, Genome Release 64-2-1, reverse complement, Verified ORF, "Lanosterol 14-alpha-demethylase; catalyzes the C-14 demethylation of lanosterol to form 4,4''-dimethyl cholesta-8,14,24-triene-3-beta-ol in the ergosterol biosynthesis pathway; member of the cytochrome P450 family; associated and coordinately regulated with the P450 reductase Ncp1p"	-	-	-	-	-	-	-	-	-	14	-	-	-	1
	RAS2	RAS2 SGDID:S000005042, Chr XIV from 440570-439602, Genome Release 64-2-1, reverse complement, Verified ORF, "GTP-binding protein; regulates nitrogen starvation response, sporulation, and filamentous growth; farnesylation and palmitoylation required for activity and localization to plasma membrane; homolog of mammalian Ras proto-oncogenes; RAS2 has a paralog, RAS1, that arose from the whole genome…	-	-	-	-	-	-	-	-	-	12	-	-	-	1
	TCB2	TCB2 SGDID:S000005031, Chr XIV from 462411-465947, Genome Release 64-2-1, Verified ORF, "ER protein involved in ER-plasma membrane tethering; one of 6 proteins (Ist2p, Scs2p, Scs22p, Tcb1p, Tcb2p, Tcb3p) that connect ER to plasma membrane (PM) and regulate PM phosphatidylinositol-4-phosphate (PI4P) levels by controlling access of Sac1p phosphatase to its substrate PI4P in the PM; contains 3 calci…	-	-	-	-	-	-	-	-	-	15	-	-	-	1
	MEU1	MEU1 SGDID:S000004007, Chr XII from 177608-178621, Genome Release 64-2-1, Verified ORF, "Methylthioadenosine phosphorylase (MTAP); catalyzes the initial step in the methionine salvage pathway; affects polyamine biosynthesis through regulation of ornithine decarboxylase (Spe1p) activity; regulates ADH2 gene expression"	-	-	-	-	-	-	-	-	-	14	-	-	-	1
	ALO1	ALO1 SGDID:S000004551, Chr XIII from 97371-95791, Genome Release 64-2-1, reverse complement, Verified ORF, "D-Arabinono-1,4-lactone oxidase; catalyzes the final step in biosynthesis of dehydro-D-arabinono-1,4-lactone, which is protective against oxidative stress"	-	-	-	-	-	-	-	-	-	14	-	-	-	1
	ZRC1	ZRC1 SGDID:S000004856, Chr XIII from 756166-754838, Genome Release 64-2-1, reverse complement, Verified ORF, "Vacuolar membrane zinc transporter; transports zinc from cytosol to vacuole for storage; also has role in resistance to zinc shock resulting from sudden influx of zinc into cytoplasm; human ortholog SLC30A10 functions as a Mn transporter and mutations in SLC30A10 cause neurotoxic accumula…	-	-	-	-	-	-	-	-	-	10	-	-	-	1
	EDC3	EDC3 SGDID:S000000741, Chr V from 126629-128284, Genome Release 64-2-1, Verified ORF, "Non-essential conserved protein with a role in mRNA decapping; specifically affects the function of the decapping enzyme Dcp1p; mediates decay of the RPS28B mRNA via binding to both Rps28Bp (or Rps28Ap) and the RPS28B mRNA; mediates decay of the YRA1 mRNA by a different, translation-independent mechanism; local…	-	-	-	-	-	-	-	-	-	13	-	-	-	1
	PPZ1	PPZ1 SGDID:S000004478, Chr XIII from 241536-239458, Genome Release 64-2-1, reverse complement, Verified ORF, "Serine/threonine protein phosphatase Z, isoform of Ppz2p; involved in regulation of potassium transport, which affects osmotic stability, cell cycle progression, and halotolerance"	-	-	-	-	-	-	-	-	-	12	-	-	-	1
	SPC110	SPC110 SGDID:S000002764, Chr IV from 1186107-1188941, Genome Release 64-2-1, Verified ORF, "Inner plaque spindle pole body (SPB) component; ortholog of human kendrin; involved in connecting nuclear microtubules to SPB; interacts with Tub4p-complex and calmodulin; phosphorylated by Mps1p in cell cycle-dependent manner"	-	-	-	-	-	-	-	-	-	15	-	-	-	1
	GPA1	GPA1 SGDID:S000001047, Chr VIII from 114917-113499, Genome Release 64-2-1, reverse complement, Verified ORF, "Subunit of the G protein involved in pheromone response; GTP-binding alpha subunit of the heterotrimeric G protein; negatively regulates the mating pathway by sequestering G(beta)gamma and by triggering an adaptive response; activates Vps34p at the endosome; protein abundance increases in…	-	-	-	-	-	-	-	-	-	11	-	-	-	1
	CFT1	CFT1 SGDID:S000002709, Chr IV from 1063352-1067425, Genome Release 64-2-1, Verified ORF, "RNA-binding subunit of the mRNA cleavage and polyadenylation factor; involved in poly(A) site recognition and required for both pre-mRNA cleavage and polyadenylation, 51% sequence similarity with mammalian AAUAA-binding subunit of CPSF"	-	-	-	-	-	-	-	-	-	14	-	-	-	1
	NUT1	NUT1 SGDID:S000003119, Chr VII from 217524-220922, Genome Release 64-2-1, Verified ORF, "Component of the RNA polymerase II mediator complex; mediator is required for transcriptional activation and also has a role in basal transcription"	-	-	-	-	-	-	-	-	-	13	-	-	-	1
	KIN1	KIN1 SGDID:S000002529, Chr IV from 694700-697894, Genome Release 64-2-1, Verified ORF, "Serine/threonine protein kinase involved in regulation of exocytosis; localizes to the cytoplasmic face of the plasma membrane; KIN1 has a paralog, KIN2, that arose from the whole genome duplication"	-	-	-	-	-	-	-	-	-	13	-	-	-	1
	IFA38	IFA38 SGDID:S000000363, Chr II from 558685-559728, Genome Release 64-2-1, Verified ORF, "Microsomal beta-keto-reductase; contains oleate response element (ORE) sequence in the promoter region; mutants exhibit reduced VLCFA synthesis, accumulate high levels of dihydrosphingosine, phytosphingosine and medium-chain ceramides"	-	-	-	-	-	-	-	-	-	13	-	-	-	1
	FAP7	FAP7 SGDID:S000002325, Chr IV from 164042-163449, Genome Release 64-2-1, reverse complement, Verified ORF, "Essential NTPase required for small ribosome subunit synthesis; mediates processing of the 20S pre-rRNA at site D in the cytoplasm but associates only transiently with 43S preribosomes via Rps14p, may be the endonuclease for site D; depletion leads to accumulation of pre-40S ribosomes in 80…	-	-	-	-	-	-	-	-	-	10	-	-	-	1
	TAF14	TAF14 SGDID:S000006050, Chr XVI from 305298-305306,305412-306137, Genome Release 64-2-1, Verified ORF, "Subunit of TFIID, TFIIF, INO80, SWI/SNF, and NuA3 complexes; involved in RNA polymerase II transcription initiation and in chromatin modification; contains a YEATS domain"	-	-	-	-	-	-	-	-	-	10	-	-	-	1
	TWF1	TWF1 SGDID:S000003312, Chr VII from 642010-643008, Genome Release 64-2-1, Verified ORF, "Twinfilin; highly conserved actin monomer-sequestering protein involved in regulation of the cortical actin cytoskeleton; coordinates actin filament severing and monomer sequestering at sites of rapid actin turnover; composed of two cofilin-like regions, localizes actin monomers to sites of rapid filament ass…	-	-	-	-	-	-	-	-	-	12	-	-	-	1
	TAH11	TAH11 SGDID:S000003807, Chr X from 522048-523862, Genome Release 64-2-1, Verified ORF, "DNA replication licensing factor; required for pre-replication complex assembly"	-	-	-	-	-	-	-	-	-	8	-	-	-	1
	VBA4	VBA4 SGDID:S000002526, Chr IV from 688227-690533, Genome Release 64-2-1, Uncharacterized ORF, "Protein of unknown function; proposed role as a basic amino acid permease based on phylogeny; GFP-fusion protein localizes to vacuolar membrane; physical interaction with Atg27p suggests a possible role in autophagy; non-essential gene"	-	-	-	-	-	-	-	-	-	11	-	-	-	1
	POL3	POL3 SGDID:S000002260, Chr IV from 276872-280165, Genome Release 64-2-1, Verified ORF, "Catalytic subunit of DNA polymerase delta; required for chromosomal DNA replication during mitosis and meiosis, intragenic recombination, repair of double strand DNA breaks, and DNA replication during nucleotide excision repair (NER)"	-	-	-	-	-	-	-	-	-	9	-	-	-	1
	SDH1	SDH1 SGDID:S000001631, Chr XI from 171129-169207, Genome Release 64-2-1, reverse complement, Verified ORF, "Flavoprotein subunit of succinate dehydrogenase; couples the oxidation of succinate to the transfer of electrons to ubiquinone as part of the TCA cycle and the mitochondrial respiratory chain; FAD binding to Sdh1p is required for the assembly of the succinate dehydrogenase subunits; SDH1 ha…	-	-	-	-	-	-	-	-	-	9	-	-	-	1
	MRH4	MRH4 SGDID:S000003032, Chr VII from 383208-381523, Genome Release 64-2-1, reverse complement, Verified ORF, "Mitochondrial ATP-dependent RNA helicase of the DEAD-box family; required for assembly of the large subunit of mitochondrial ribosomes; binds to the large subunit rRNA, 21S_rRNA; localizes to the matrix face of the mitochondrial inner membrane and associates with the large subunit precurso…	-	-	-	-	-	-	-	-	-	12	-	-	-	1
	YSP2	YSP2 SGDID:S000002734, Chr IV from 1124925-1120609, Genome Release 64-2-1, reverse complement, Verified ORF, "Protein involved in programmed cell death; mutant shows resistance to cell death induced by amiodarone or intracellular acidification; YSP2 has a paralog, YHR080C, that arose from the whole genome duplication"	-	-	-	-	-	-	-	-	-	12	-	-	-	1
	GCG1	GCG1 SGDID:S000000965, Chr V from 503782-503084, Genome Release 64-2-1, reverse complement, Verified ORF, "Gamma-glutamyl cyclotransferase; cleaves the gamma-glutamyl bond of glutathione to yield 5-oxoproline and a Cys-Gly dipeptide; similar to mammalian pro-apoptotic protein ChaC1; expression of mouse ChaC1 in yeast increases apoptosis; green fluorescent protein (GFP)-fusion protein localizes to…	-	-	-	-	-	-	-	-	-	8	-	-	-	1
	HFD1	HFD1 SGDID:S000004716, Chr XIII from 491992-490394, Genome Release 64-2-1, reverse complement, Verified ORF, "Hexadecenal dehydrogenase; involved in the conversion of sphingosine 1-phosphate breakdown product hexadecenal to hexadecenoic acid; located in the mitochondrial outer membrane and also in lipid particles; has similarity to ALDH3A2, a human fatty aldehyde dehydrogenase (FALDH) mutated in …	-	-	-	-	-	-	-	-	-	7	-	-	-	1
	PDS5	PDS5 SGDID:S000004681, Chr XIII from 420029-416196, Genome Release 64-2-1, reverse complement, Verified ORF, "Cohesion maintenance factor; involved in sister chromatid condensation and cohesion; colocalizes with cohesin on chromosomes; performs its cohesin maintenance function in pre-anaphase cells by protecting the integrity of the cohesion complex; also required during meiosis; relocalizes to t…	-	-	-	-	-	-	-	-	-	10	-	-	-	1
	YPT7	YPT7 SGDID:S000004460, Chr XIII from 267174-267800, Genome Release 64-2-1, Verified ORF, "Rab family GTPase; GTP-binding protein of the rab family; required for homotypic fusion event in vacuole inheritance, for endosome-endosome fusion; interacts with the cargo selection/retromer complex for retrograde sorting; similar to mammalian Rab7"	-	-	-	-	-	-	-	-	-	8	-	-	-	1
	POP2	POP2 SGDID:S000005335, Chr XIV from 720647-719346, Genome Release 64-2-1, reverse complement, Verified ORF, "RNase of the DEDD superfamily; subunit of the Ccr4-Not complex that mediates 3' to 5' mRNA deadenylation"	-	-	-	-	-	-	-	-	-	9	-	-	-	1
	YTA7	YTA7 SGDID:S000003502, Chr VII from 1027370-1031509, Genome Release 64-2-1, Verified ORF, "Protein that localizes to chromatin; has a role in regulation of histone gene expression; has a bromodomain-like region that interacts with the N-terminal tail of histone H3, and an ATPase domain; relocalizes to the cytosol in response to hypoxia; potentially phosphorylated by Cdc28p"	-	-	-	-	-	-	-	-	-	9	-	-	-	1
	NUD1	NUD1 SGDID:S000005900, Chr XV from 1036834-1039389, Genome Release 64-2-1, Verified ORF, "Component of the spindle pole body outer plaque; acts through the mitotic exit network to specify asymmetric spindle pole body inheritance"	-	-	-	-	-	-	-	-	-	8	-	-	-	1
	ODC2	ODC2 SGDID:S000005748, Chr XV from 758330-759253, Genome Release 64-2-1, Verified ORF, "Mitochondrial inner membrane transporter; 2-oxodicarboxylate transporter, exports 2-oxoadipate and 2-oxoglutarate from the mitochondrial matrix to the cytosol for use in lysine and glutamate biosynthesis and in lysine catabolism; ODC2 has a paralog, ODC1, that arose from the whole genome duplication"	-	-	-	-	-	-	-	-	-	9	-	-	-	1
	PRI1	PRI1 SGDID:S000001447, Chr IX from 374306-373077, Genome Release 64-2-1, reverse complement, Verified ORF, "Subunit of DNA primase; DNA primase is required for DNA synthesis and double-strand break repair"	-	-	-	-	-	-	-	-	-	8	-	-	-	1
	PHO81	PHO81 SGDID:S000003465, Chr VII from 958210-954674, Genome Release 64-2-1, reverse complement, Verified ORF, "Cyclin-dependent kinase (CDK) inhibitor; regulates Pho80p-Pho85p and Pcl7p-Pho85p cyclin-CDK complexes in response to phosphate levels; inhibitory activity for Pho80p-Pho85p requires myo-D-inositol heptakisphosphate (IP7) generated by Vip1p; relative distribution to the nucleus increases …	-	-	-	-	-	-	-	-	-	8	-	-	-	1
	YKL033W-A	YKL033W-A SGDID:S000007242, Chr XI from 374505-375215, Genome Release 64-2-1, Uncharacterized ORF, "Putative protein of unknown function; similar to uncharacterized proteins from other fungi"	-	-	-	-	-	-	-	-	-	7	-	-	-	1
	SNF5	SNF5 SGDID:S000000493, Chr II from 779667-782384, Genome Release 64-2-1, Verified ORF, "Subunit of the SWI/SNF chromatin remodeling complex; involved in transcriptional regulation; functions interdependently in transcriptional activation with Snf2p and Snf6p; relocates to the cytosol under hypoxic conditions"	-	-	-	-	-	-	-	-	-	8	-	-	-	1
	LTV1	LTV1 SGDID:S000001626, Chr XI from 176781-178172, Genome Release 64-2-1, Verified ORF, "Component of the GSE complex; GSE is required for proper sorting of amino acid permease Gap1p; required for ribosomal small subunit export from nucleus; required for growth at low temperature"	-	-	-	-	-	-	-	-	-	8	-	-	-	1
	SED5	SED5 SGDID:S000004016, Chr XII from 196472-195450, Genome Release 64-2-1, reverse complement, Verified ORF, "cis-Golgi t-SNARE syntaxin; required for vesicular transport between the ER and the Golgi complex; binds at least 9 SNARE proteins"	-	-	-	-	-	-	-	-	-	7	-	-	-	1
	LSM1	LSM1 SGDID:S000003660, Chr X from 187644-187126, Genome Release 64-2-1, reverse complement, Verified ORF, "Lsm (Like Sm) protein; forms heteroheptameric complex (with Lsm2p, Lsm3p, Lsm4p, Lsm5p, Lsm6p, and Lsm7p) involved in degradation of cytoplasmic mRNAs; also enters the nucleus and positively regulates transcription initiation; unlike most Sm-like proteins, Lsm1p requires both its SM-domain a…	-	-	-	-	-	-	-	-	-	9	-	-	-	1
	SRY1	SRY1 SGDID:S000001701, Chr XI from 18339-17359, Genome Release 64-2-1, reverse complement, Verified ORF, "3-hydroxyaspartate dehydratase; deaminates L-threo-3-hydroxyaspartate to form oxaloacetate and ammonia; required in the presence of hydroxyaspartate; highly similar to mouse serine racemase (Srr) but has no serine racemase activity"	-	-	-	-	-	-	-	-	-	7	-	-	-	1
	PMD1	PMD1 SGDID:S000000934, Chr V from 430449-425188, Genome Release 64-2-1, reverse complement, Verified ORF, "Protein with an N-terminal kelch-like domain; putative negative regulator of early meiotic gene expression; required, with Mds3p, for growth under alkaline conditions; PMD1 has a paralog, MDS3, that arose from the whole genome duplication"	-	-	-	-	-	-	-	-	-	9	-	-	-	1
	TRS130	TRS130 SGDID:S000004831, Chr XIII from 706887-703579, Genome Release 64-2-1, reverse complement, Verified ORF, "Component of transport protein particle (TRAPP) complex II; TRAPPII is a multimeric guanine nucleotide-exchange factor for the GTPase Ypt1p, regulating intra-Golgi and endosome-Golgi traffic"	-	-	-	-	-	-	-	-	-	9	-	-	-	1
	ALK1	ALK1 SGDID:S000002989, Chr VII from 454785-457067, Genome Release 64-2-1, Verified ORF, "Protein kinase; along with its paralog, ALK2, required for proper spindle positioning and nuclear segregation following mitotic arrest, proper organization of cell polarity factors in mitosis, proper localization of formins and polarity factors, and survival in cells that activate spindle assembly checkpoint;…	-	-	-	-	-	-	-	-	-	8	-	-	-	1
	ERV41	ERV41 SGDID:S000004532, Chr XIII from 140090-139063,140214-140184, Genome Release 64-2-1, reverse complement, Verified ORF, "Protein localized to COPII-coated vesicles; forms a complex with Erv46p; involved in the membrane fusion stage of transport; has homology to human ERGIC2 (PTX1) protein"	-	-	-	-	-	-	-	-	-	7	-	-	-	1
	ORC3	ORC3 SGDID:S000003927, Chr XII from 141073-142923, Genome Release 64-2-1, Verified ORF, "Subunit of the origin recognition complex (ORC); ORC directs DNA replication by binding to replication origins and is also involved in transcriptional silencing"	-	-	-	-	-	-	-	-	-	8	-	-	-	1
	YGR012W	YGR012W SGDID:S000003244, Chr VII from 513159-514340, Genome Release 64-2-1, Verified ORF, "Putative cysteine synthase; localized to the mitochondrial outer membrane"	-	-	-	-	-	-	-	-	-	7	-	-	-	1
	ZRT1	ZRT1 SGDID:S000003224, Chr VII from 20978-22108, Genome Release 64-2-1, Verified ORF, "High-affinity zinc transporter of the plasma membrane; responsible for the majority of zinc uptake; transcription is induced under low-zinc conditions by the Zap1p transcription factor"	-	-	-	-	-	-	-	-	-	6	-	-	-	1
	PAP1	PAP1 SGDID:S000001710, Chr XI from 443232-444938, Genome Release 64-2-1, Verified ORF, "Poly(A) polymerase; one of three factors required for mRNA 3'-end polyadenylation, forms multiprotein complex with polyadenylation factor I (PF I), also required for mRNA nuclear export; may also polyadenylate rRNAs; required for gene looping"	-	-	-	-	-	-	-	-	-	7	-	-	-	1
	BUD7	BUD7 SGDID:S000005825, Chr XV from 878435-880675, Genome Release 64-2-1, Verified ORF, "Member of the ChAPs family (Chs5p-Arf1p-binding proteins); members include Bch1p, Bch2p, Bud7p, and Chs6p; ChAPs family proteins form the exomer complex with Chs5p to mediate export of specific cargo proteins, including Chs3p, from the Golgi to the plasma membrane; BUD7 has a paralog, BCH1, that arose from the…	-	-	-	-	-	-	-	-	-	7	-	-	-	1
	BRR2	BRR2 SGDID:S000000974, Chr V from 536021-529530, Genome Release 64-2-1, reverse complement, Verified ORF, "RNA-dependent ATPase RNA helicase (DEIH box); required for disruption of U4/U6 base-pairing in native snRNPs to activate the spliceosome for catalysis; homologous to human U5-200kD"	-	-	-	-	-	-	-	-	-	7	-	-	-	1
	TOM1	TOM1 SGDID:S000002865, Chr IV from 1369790-1379596, Genome Release 64-2-1, Verified ORF, "E3 ubiquitin ligase of the hect-domain class; has a role in mRNA export from the nucleus and may regulate transcriptional coactivators; involved in degradation of excess histones; interacts with Dia2p and is required for Dia2p degradation; required to target Cdc6p for ubiquitin-mediated destruction during G1…	-	-	-	-	-	-	-	-	-	8	-	-	-	1
	MRPL8	MRPL8 SGDID:S000003599, Chr X from 316475-315759, Genome Release 64-2-1, reverse complement, Verified ORF, "Mitochondrial ribosomal protein of the large subunit"	-	-	-	-	-	-	-	-	-	6	-	-	-	1
	EMP70	EMP70 SGDID:S000004073, Chr XII from 296094-294091, Genome Release 64-2-1, reverse complement, Verified ORF, "Protein with a role in cellular adhesion and filamentous growth; also endosome-to-vacuole sorting; similar to Tmn3p; member of Transmembrane Nine family of proteins with 9 transmembrane segments; EMP70 has a paralog, TMN2, that arose from the whole genome duplication"	-	-	-	-	-	-	-	-	-	6	-	-	-	1
	HXT4	HXT4 SGDID:S000001134, Chr VIII from 288811-287081, Genome Release 64-2-1, reverse complement, Verified ORF, "High-affinity glucose transporter; member of the major facilitator superfamily, expression is induced by low levels of glucose and repressed by high levels of glucose; HXT4 has a paralog, HXT7, that arose from the whole genome duplication"	-	-	-	-	-	-	-	-	-	7	-	-	-	1
	RGA2	RGA2 SGDID:S000002787, Chr IV from 1230167-1233196, Genome Release 64-2-1, Verified ORF, "GTPase-activating protein for polarity-establishment protein Cdc42p; implicated in control of septin organization, pheromone response, and haploid invasive growth; regulated by Pho85p and Cdc28p; RGA2 has a paralog, RGA1, that arose from the whole genome duplication"	-	-	-	-	-	-	-	-	-	6	-	-	-	1
	DMA1	DMA1 SGDID:S000001157, Chr VIII from 341359-340109, Genome Release 64-2-1, reverse complement, Verified ORF, "Ubiquitin-protein ligase (E3); controls septin dynamics, spindle position checkpoint (SPOC) with ligase Dma2p by regulating recruitment of Elm1p to bud neck; regulates levels of eIF2 subunit Gcd11p, as well as abundance, localization, and ubiquitination of Cdk inhibitory kinase Swe1p; ubi…	-	-	-	-	-	-	-	-	-	6	-	-	-	1
	MSH1	MSH1 SGDID:S000001162, Chr VIII from 349574-352453, Genome Release 64-2-1, Verified ORF, "DNA-binding protein of the mitochondria; involved in repair of mitochondrial DNA; has ATPase activity and binds to DNA mismatches; has homology to E. coli MutS; transcription is induced during meiosis"	-	-	-	-	-	-	-	-	-	7	-	-	-	1
	YSC84	YSC84 SGDID:S000001058, Chr VIII from 138240-136881,138455-138409, Genome Release 64-2-1, reverse complement, Verified ORF, "Actin-binding protein; involved in bundling of actin filaments and endocytosis of actin cortical patches; activity stimulated by Las17p; contains SH3 domain similar to Rvs167p; YSC84 has a paralog, LSB3, that arose from the whole genome duplication"	-	-	-	-	-	-	-	-	-	7	-	-	-	1
	TCD1	TCD1 SGDID:S000001045, Chr VIII from 111317-110028, Genome Release 64-2-1, reverse complement, Verified ORF, "tRNA threonylcarbamoyladenosine dehydratase; required for the ct6A tRNA base modification, where an adenosine at position 37 is modified to form a cyclized active ester with an oxazolone ring; localized to the mitochondrial outer membrane; TCD1 has a paralog, TCD2, that arose from the who…	-	-	-	-	-	-	-	-	-	6	-	-	-	1
	HST2	HST2 SGDID:S000005936, Chr XVI from 526883-525810, Genome Release 64-2-1, reverse complement, Verified ORF, "Cytoplasmic NAD(+)-dependent protein deacetylase; member of the silencing information regulator 2 (Sir2) family of NAD(+)-dependent protein deacetylases; modulates nucleolar (rDNA) and telomeric silencing; possesses NAD(+)-dependent histone deacetylase activity in vitro; contains a nuclear…	-	-	-	-	-	-	-	-	-	7	-	-	-	1
	PRS4	PRS4 SGDID:S000000164, Chr II from 92414-93394, Genome Release 64-2-1, Verified ORF, "5-phospho-ribosyl-1(alpha)-pyrophosphate synthetase, synthesizes PRPP; which is required for nucleotide, histidine, and tryptophan biosynthesis; one of five related enzymes, which are active as heteromultimeric complexes; PRS4 has a paralog, PRS2, that arose from the whole genome duplication; a missense mutation…	-	-	-	-	-	-	-	-	-	7	-	-	-	1
	LOA1	LOA1 SGDID:S000006343, Chr XVI from 814058-813156, Genome Release 64-2-1, reverse complement, Verified ORF, "Lysophosphatidic acid acyltransferase; involved in triacelglyceride homeostasis and lipid droplet formation; localized to lipid droplets and the ER; specificity for oleoyl-CoA"	-	-	-	-	-	-	-	-	-	7	-	-	-	1
	CDC39	CDC39 SGDID:S000000689, Chr III from 280117-286443, Genome Release 64-2-1, Verified ORF, "Component of the CCR4-NOT1 core complex; this complex has multiple roles in regulating mRNA levels including regulation of transcription and destabilizing mRNAs by deadenylation; basal transcription factor"	-	-	-	-	-	-	-	-	-	-	64	-	-	1
	TIF2	TIF2 SGDID:S000003674, Chr X from 154691-153504, Genome Release 64-2-1, reverse complement, Verified ORF, "Translation initiation factor eIF4A; DEA(D/H)-box RNA helicase that couples ATPase activity to RNA binding and unwinding; forms a dumbbell structure of two compact domains connected by a linker; interacts with eIF4G; protein abundance increases in response to DNA replication stress; TIF2 has…	-	-	-	-	-	-	-	-	-	-	63	-	-	1
	CRM1	CRM1 SGDID:S000003450, Chr VII from 932541-935795, Genome Release 64-2-1, Verified ORF, "Major karyopherin; involved in export of proteins, RNAs, and ribosomal subunits from the nucleus; exportin"	-	-	-	-	-	-	-	-	-	-	40	-	-	1
	SPT6	SPT6 SGDID:S000003348, Chr VII from 720409-724764, Genome Release 64-2-1, Verified ORF, "Nucleosome remodeling protein; functions in various aspects of transcription, chromatin maintenance, and RNA processing; required for the maintenance of chromatin structure during transcription in order to inhibit transcription from promoters within the coding region; required for H3K36 trimethylation but not…	-	-	-	-	-	-	-	-	-	-	34	-	-	1
	VMA5	VMA5 SGDID:S000001563, Chr XI from 285030-286208, Genome Release 64-2-1, Verified ORF, "Subunit C of the V1 peripheral membrane domain of V-ATPase; part of the electrogenic proton pump found throughout the endomembrane system; required for the V1 domain to assemble onto the vacuolar membrane; the V1 peripheral membrane domain of vacuolar H+-ATPase (V-ATPase) has eight subunits"	-	-	-	-	-	-	-	-	-	-	27	-	-	1
	ILS1	ILS1 SGDID:S000000172, Chr II from 84261-81043, Genome Release 64-2-1, reverse complement, Verified ORF, "Cytoplasmic isoleucine-tRNA synthetase; target of the G1-specific inhibitor reveromycin A"	-	-	-	-	-	-	-	-	-	-	32	-	-	1
	TEF4	TEF4 SGDID:S000001564, Chr XI from 282891-283095,283422-284455, Genome Release 64-2-1, Verified ORF, "Gamma subunit of translational elongation factor eEF1B; stimulates the binding of aminoacyl-tRNA (AA-tRNA) to ribosomes by releasing eEF1A (Tef1p/Tef2p) from the ribosomal complex"	-	-	-	-	-	-	-	-	-	-	39	-	-	1
	MES1	MES1 SGDID:S000003496, Chr VII from 1021853-1019598, Genome Release 64-2-1, reverse complement, Verified ORF, "Methionyl-tRNA synthetase; forms a complex with glutamyl-tRNA synthetase (Gus1p) and Arc1p, which increases the catalytic efficiency of both tRNA synthetases; also has a role in nuclear export of tRNAs"	-	-	-	-	-	-	-	-	-	-	18	-	-	1
	ILV3	ILV3 SGDID:S000003777, Chr X from 466208-464451, Genome Release 64-2-1, reverse complement, Verified ORF, "Dihydroxyacid dehydratase; catalyzes third step in the common pathway leading to biosynthesis of branched-chain amino acids"	-	-	-	-	-	-	-	-	-	-	22	-	-	1
	TKL1	TKL1 SGDID:S000006278, Chr XVI from 694838-692796, Genome Release 64-2-1, reverse complement, Verified ORF, "Transketolase; catalyzes conversion of xylulose-5-phosphate and ribose-5-phosphate to sedoheptulose-7-phosphate and glyceraldehyde-3-phosphate in the pentose phosphate pathway; needed for synthesis of aromatic amino acids; TKL1 has a paralog, TKL2, that arose from the whole genome duplicat…	-	-	-	-	-	-	-	-	-	-	23	-	-	1
	DNM1	DNM1 SGDID:S000003924, Chr XII from 147890-150163, Genome Release 64-2-1, Verified ORF, "Dynamin-related GTPase involved in mitochondrial organization; required for mitochondrial fission and morphology; assembles on the cytoplasmic face of mitochondrial tubules at sites at which division will occur; also participates in endocytosis and regulating peroxisome abundance"	-	-	-	-	-	-	-	-	-	-	17	-	-	1
	DHH1	DHH1 SGDID:S000002319, Chr IV from 171930-170410, Genome Release 64-2-1, reverse complement, Verified ORF, "Cytoplasmic DExD/H-box helicase, stimulates mRNA decapping; coordinates distinct steps in mRNA function and decay, interacts with both the decapping and deadenylase complexes, role in translational repression, mRNA decay, and processing body dynamics; may have a role in mRNA export; C-termi…	-	-	-	-	-	-	-	-	-	-	19	-	-	1
	GCD6	GCD6 SGDID:S000002619, Chr IV from 884727-886865, Genome Release 64-2-1, Verified ORF, "Catalytic epsilon subunit of the translation initiation factor eIF2B; eIF2B is the guanine-nucleotide exchange factor for eIF2; activity subsequently regulated by phosphorylated eIF2; first identified as a negative regulator of GCN4 expression; forms cytoplasmic foci upon DNA replication stress"	-	-	-	-	-	-	-	-	-	-	20	-	-	1
	CSR1	CSR1 SGDID:S000004372, Chr XII from 878282-879508, Genome Release 64-2-1, Verified ORF, "Phosphatidylinositol transfer protein; has a potential role in regulating lipid and fatty acid metabolism under heme-depleted conditions; interacts specifically with thioredoxin peroxidase; may have a role in oxidative stress resistance; protein abundance increases in response to DNA replication stress"	-	-	-	-	-	-	-	-	-	-	17	-	-	1
	PRS5	PRS5 SGDID:S000005422, Chr XV from 212244-213734, Genome Release 64-2-1, Verified ORF, "5-phospho-ribosyl-1(alpha)-pyrophosphate synthetase; synthesizes PRPP, which is required for nucleotide, histidine, and tryptophan biosynthesis; one of five related enzymes, which are active as heteromultimeric complexes; forms cytoplasmic foci upon DNA replication stress"	-	-	-	-	-	-	-	-	-	-	15	-	-	1
	GCD1	GCD1 SGDID:S000005786, Chr XV from 813984-815720, Genome Release 64-2-1, Verified ORF, "Gamma subunit of the translation initiation factor eIF2B; the guanine-nucleotide exchange factor for eIF2; activity subsequently regulated by phosphorylated eIF2; first identified as a negative regulator of GCN4 expression"	-	-	-	-	-	-	-	-	-	-	18	-	-	1
	RRP6	RRP6 SGDID:S000005527, Chr XV from 326832-329033, Genome Release 64-2-1, Verified ORF, "Nuclear exosome exonuclease component; has 3'-5' exonuclease activity that is regulated by Lrp1p; involved in RNA processing, maturation, surveillance, degradation, tethering, and export; role in sn/snoRNAs precursor degradation; forms a stable heterodimer with Lrp1p; has similarity to E. coli RNase D and to h…	-	-	-	-	-	-	-	-	-	-	13	-	-	1
	SEC28	SEC28 SGDID:S000001338, Chr IX from 216658-217548, Genome Release 64-2-1, Verified ORF, "Epsilon-COP subunit of the coatomer; regulates retrograde Golgi-to-ER protein traffic; stabilizes Cop1p, the alpha-COP and the coatomer complex; non-essential for cell growth; protein abundance increases in response to DNA replication stress"	-	-	-	-	-	-	-	-	-	-	12	-	-	1
	MCK1	MCK1 SGDID:S000005251, Chr XIV from 57573-56446, Genome Release 64-2-1, reverse complement, Verified ORF, "Dual-specificity ser/thr and tyrosine protein kinase; roles in chromosome segregation, meiotic entry, genome stability, phosphorylation-dependent protein degradation (Rcn1p and Cdc6p), inhibition of protein kinase A, transcriptional regulation, inhibition of RNA pol III, calcium stress and i…	-	-	-	-	-	-	-	-	-	-	14	-	-	1
	HOM3	HOM3 SGDID:S000000854, Chr V from 257958-256375, Genome Release 64-2-1, reverse complement, Verified ORF, "Aspartate kinase (L-aspartate 4-P-transferase); cytoplasmic enzyme that catalyzes the first step in the common pathway for methionine and threonine biosynthesis; expression regulated by Gcn4p and the general control of amino acid synthesis"	-	-	-	-	-	-	-	-	-	-	13	-	-	1
	EFB1	EFB1 SGDID:S000000003, Chr I from 142174-142253,142620-143160, Genome Release 64-2-1, Verified ORF, "Translation elongation factor 1 beta; stimulates nucleotide exchange to regenerate EF-1 alpha-GTP for the next elongation cycle; part of the EF-1 complex, which facilitates binding of aminoacyl-tRNA to the ribosomal A site"	-	-	-	-	-	-	-	-	-	-	14	-	-	1
	SVF1	SVF1 SGDID:S000002754, Chr IV from 1168659-1167214, Genome Release 64-2-1, reverse complement, Verified ORF, "Protein with a potential role in cell survival pathways; required for the diauxic growth shift; expression in mammalian cells increases survival under conditions inducing apoptosis; mutant has increased aneuploidy tolerance"	-	-	-	-	-	-	-	-	-	-	14	-	-	1
	GET4	GET4 SGDID:S000005690, Chr XV from 644332-643394, Genome Release 64-2-1, reverse complement, Verified ORF, "Protein involved in inserting tail-anchored proteins into ER membranes; forms a complex with Mdy2p; highly conserved across species and homologous to human gene C7orf20"	-	-	-	-	-	-	-	-	-	-	11	-	-	1
	SEC15	SEC15 SGDID:S000003202, Chr VII from 59122-61854, Genome Release 64-2-1, Verified ORF, "Essential 113 kDa subunit of the exocyst complex; the exocyst mediates polarized targeting and tethering of post-Golgi secretory vesicles to active sites of exocytosis prior to SNARE-mediated fusion; interacts with and functions as a downstream effector of active, GTP-bound Sec4p, a Rab family GTPase"	-	-	-	-	-	-	-	-	-	-	15	-	-	1
	NOT3	NOT3 SGDID:S000001300, Chr IX from 282652-280142, Genome Release 64-2-1, reverse complement, Verified ORF, "Subunit of CCR4-NOT global transcriptional regulator; involved intranscription initiation and elongation and in mRNA degradation; conserved lysine in human homolog of Not3p and Not5p is mutated in cancers"	-	-	-	-	-	-	-	-	-	-	18	-	-	1
	NOC3	NOC3 SGDID:S000003992, Chr XII from 156334-154343, Genome Release 64-2-1, reverse complement, Verified ORF, "Subunit of a nuclear complex with Noc2p and pre-replicative complexes; the Noc2p-Noc3p complex binds to 66S ribosomal precursors to mediate their maturation and intranuclear transport; binds to chromatin at active replication origins, and is required for pre-RC formation and maintenance du…	-	-	-	-	-	-	-	-	-	-	12	-	-	1
	NRD1	NRD1 SGDID:S000005195, Chr XIV from 174315-172588, Genome Release 64-2-1, reverse complement, Verified ORF, "RNA-binding subunit of Nrd1 complex; complex interacts with exosome to mediate 3'-end formation of some mRNAs, snRNAs, snoRNAs, and CUTs; interacts with CTD of RNA pol II large subunit Rpo21p at phosphorylated Ser5 to direct transcription termination of non-polyadenylated transcripts; H3K4…	-	-	-	-	-	-	-	-	-	-	13	-	-	1
	KGD1	KGD1 SGDID:S000001387, Chr IX from 122689-125733, Genome Release 64-2-1, Verified ORF, "Subunit of the mitochondrial alpha-ketoglutarate dehydrogenase complex; catalyzes a key step in the tricarboxylic acid (TCA) cycle, the oxidative decarboxylation of alpha-ketoglutarate to form succinyl-CoA"	-	-	-	-	-	-	-	-	-	-	12	-	-	1
	RNR2	RNR2 SGDID:S000003563, Chr X from 392404-393603, Genome Release 64-2-1, Verified ORF, "Ribonucleotide-diphosphate reductase (RNR), small subunit; the RNR complex catalyzes the rate-limiting step in dNTP synthesis and is regulated by DNA replication and DNA damage checkpoint pathways via localization of the small subunits; RNR2 has a paralog, RNR4, that arose from the whole genome duplication"	-	-	-	-	-	-	-	-	-	-	11	-	-	1
	SDS23	SDS23 SGDID:S000003024, Chr VII from 397618-396035, Genome Release 64-2-1, reverse complement, Verified ORF, "Protein involved in cell separation during budding; one of two S. cerevisiae homologs (Sds23p and Sds24p) of the S. pombe Sds23 protein, which is implicated in APC/cyclosome regulation; SDS23 has a paralog, SDS24, that arose from the whole genome duplication"	-	-	-	-	-	-	-	-	-	-	10	-	-	1
	DRS1	DRS1 SGDID:S000003931, Chr XII from 131729-133987, Genome Release 64-2-1, Verified ORF, "Nucleolar DEAD-box protein required for ribosome assembly and function; including synthesis of 60S ribosomal subunits; constituent of 66S pre-ribosomal particles"	-	-	-	-	-	-	-	-	-	-	14	-	-	1
	LSC1	LSC1 SGDID:S000005668, Chr XV from 593057-594046, Genome Release 64-2-1, Verified ORF, "Alpha subunit of succinyl-CoA ligase; succinyl-CoA ligase is a mitochondrial enzyme of the TCA cycle that catalyzes the nucleotide-dependent conversion of succinyl-CoA to succinate; phosphorylated"	-	-	-	-	-	-	-	-	-	-	11	-	-	1
	RRB1	RRB1 SGDID:S000004738, Chr XIII from 534698-533163, Genome Release 64-2-1, reverse complement, Verified ORF, "Nuclear protein involved in early steps of ribosome biogenesis; physically interacts with the ribosomal protein Rpl3p; essential gene"	-	-	-	-	-	-	-	-	-	-	10	-	-	1
	IPI3	IPI3 SGDID:S000005126, Chr XIV from 297627-295960, Genome Release 64-2-1, reverse complement, Verified ORF, "Component of the Rix1 complex and pre-replicative complexes (pre-RCs); required for processing of ITS2 sequences from 35S pre-rRNA; component of the pre-60S ribosomal particle with the dynein-related AAA-type ATPase Mdn1p; required for pre-RC formation and maintenance during DNA replicatio…	-	-	-	-	-	-	-	-	-	-	9	-	-	1
	PNO1	PNO1 SGDID:S000005671, Chr XV from 606171-605347, Genome Release 64-2-1, reverse complement, Verified ORF, "Essential nucleolar protein required for pre-18S rRNA processing; interacts with Dim1p, an 18S rRNA dimethyltransferase, and also with Nob1p, which is involved in proteasome biogenesis; contains a KH domain"	-	-	-	-	-	-	-	-	-	-	10	-	-	1
	ETT1	ETT1 SGDID:S000005577, Chr XV from 426084-424846, Genome Release 64-2-1, reverse complement, Verified ORF, "Nuclear protein that inhibits replication of Brome mosaic virus; S. cerevisiae is a model system for studying replication of positive-strand RNA viruses in their natural hosts; deletion increases stop codon readthrough"	-	-	-	-	-	-	-	-	-	-	10	-	-	1
	DOM34	DOM34 SGDID:S000004946, Chr XIV from 627456-628616, Genome Release 64-2-1, Verified ORF, "Protein that facilitates ribosomal subunit dissociation; Dom34-Hbs1 complex and Rli1p have roles in dissociating inactive ribosomes to facilitate translation restart, particularly ribosomes stalled in 3' UTRs; required for RNA cleavage in no-go decay, but reports conflict on endonuclease activity; Pelota ort…	-	-	-	-	-	-	-	-	-	-	11	-	-	1
	PTK2	PTK2 SGDID:S000003820, Chr X from 545787-548243, Genome Release 64-2-1, Verified ORF, "Putative serine/threonine protein kinase; involved in regulation of ion transport across plasma membrane; enhances spermine uptake; PTK2 has a paralog, PTK1, that arose from the whole genome duplication"	-	-	-	-	-	-	-	-	-	-	9	-	-	1
	UBX7	UBX7 SGDID:S000000477, Chr II from 749371-748061, Genome Release 64-2-1, reverse complement, Verified ORF, "UBX (ubiquitin regulatory X) domain-containing protein; interacts with Cdc48p; UBX7 has a paralog, UBX6, that arose from the whole genome duplication"	-	-	-	-	-	-	-	-	-	-	8	-	-	1
	IRR1	IRR1 SGDID:S000001288, Chr IX from 307929-304477, Genome Release 64-2-1, reverse complement, Verified ORF, "Subunit of the cohesin complex; which is required for sister chromatid cohesion during mitosis and meiosis and interacts with centromeres and chromosome arms; relocalizes to the cytosol in response to hypoxia; essential for viability"	-	-	-	-	-	-	-	-	-	-	10	-	-	1
	TFC4	TFC4 SGDID:S000003279, Chr VII from 589469-586392, Genome Release 64-2-1, reverse complement, Verified ORF, "Subunit of RNA polymerase III transcription initiation factor complex; one of six subunits of RNA polymerase III transcription initiation factor complex (TFIIIC); part of the TauA domain of TFIIIC that binds BoxA DNA promoter sites of tRNA and similar genes; has TPR motifs; human homolog i…	-	-	-	-	-	-	-	-	-	-	8	-	-	1
	RNA14	RNA14 SGDID:S000004665, Chr XIII from 392755-394788, Genome Release 64-2-1, Verified ORF, "Component of the cleavage and polyadenylation factor I (CF I); CF 1, composed of the CF 1A complex (Rna14p, Rna15p, Clp1p, Pcf11p) and Hrp1, is involved in cleavage and polyadenylation of mRNA 3' ends; bridges interaction between Rna15p and Hrp1p in the CF I complex; mutant displays reduced transcription el…	-	-	-	-	-	-	-	-	-	-	11	-	-	1
	PRP6	PRP6 SGDID:S000000259, Chr II from 347301-344602, Genome Release 64-2-1, reverse complement, Verified ORF, "Splicing factor; component of the U4/U6-U5 snRNP complex"	-	-	-	-	-	-	-	-	-	-	10	-	-	1
	VID22	VID22 SGDID:S000004365, Chr XII from 871367-868662, Genome Release 64-2-1, reverse complement, Verified ORF, "Glycosylated integral membrane protein localized to plasma membrane; plays a role in fructose-1,6-bisphosphatase (FBPase) degradation; involved in FBPase transport from the cytosol to Vid (vacuole import and degradation) vesicles; VID22 has a paralog, ENV11, that arose from the whole geno…	-	-	-	-	-	-	-	-	-	-	12	-	-	1
	VPS5	VPS5 SGDID:S000005595, Chr XV from 453768-455795, Genome Release 64-2-1, Verified ORF, "Nexin-1 homolog; required for localizing membrane proteins from a prevacuolar/late endosomal compartment back to late Golgi; structural component of retromer membrane coat complex; forms a retromer subcomplex with Vps17p; required for recruiting the retromer complex to the endosome membranes; VPS5 has a paralo…	-	-	-	-	-	-	-	-	-	-	9	-	-	1
	COG3	COG3 SGDID:S000000959, Chr V from 484788-487193, Genome Release 64-2-1, Verified ORF, "Essential component of the conserved oligomeric Golgi complex; a cytosolic tethering complex (Cog1p through Cog8p) that functions in protein trafficking to mediate fusion of transport vesicles to Golgi compartments"	-	-	-	-	-	-	-	-	-	-	11	-	-	1
	SGD1	SGD1 SGDID:S000004328, Chr XII from 802396-799697, Genome Release 64-2-1, reverse complement, Verified ORF, "Essential nuclear protein; required for biogenesis of the small ribosomal subunit; has a possible role in the osmoregulatory glycerol response; putative homolog of human NOM1 which is implicated in acute myeloid leukemia"	-	-	-	-	-	-	-	-	-	-	10	-	-	1
	RNT1	RNT1 SGDID:S000004852, Chr XIII from 749677-748262, Genome Release 64-2-1, reverse complement, Verified ORF, "Nuclear dsRNA-specific ribonuclease (RNase III); involved in rDNA transcription, rRNA processing and U2 snRNA 3' end formation by cleavage of a stem-loop structure at the 3' end of U2 snRNA; involved in polyadenylation-independent transcription termination; involved in the cell wall stres…	-	-	-	-	-	-	-	-	-	-	8	-	-	1
	POL12	POL12 SGDID:S000000131, Chr II from 153610-151493, Genome Release 64-2-1, reverse complement, Verified ORF, "B subunit of DNA polymerase alpha-primase complex; required for initiation of DNA replication during mitotic and premeiotic DNA synthesis; also functions in telomere capping and length regulation"	-	-	-	-	-	-	-	-	-	-	11	-	-	1
	SLT2	SLT2 SGDID:S000001072, Chr VIII from 170344-168890, Genome Release 64-2-1, reverse complement, Verified ORF, "Serine/threonine MAP kinase; involved in regulating maintenance of cell wall integrity, cell cycle progression, and nuclear mRNA retention in heat shock; required for mitophagy and pexophagy; affects recruitment of mitochondria to phagophore assembly site (PAS); plays a role in adaptive r…	-	-	-	-	-	-	-	-	-	-	12	-	-	1
	PEA2	PEA2 SGDID:S000000951, Chr V from 467470-466208, Genome Release 64-2-1, reverse complement, Verified ORF, "Coiled-coil 12S polarisome subunit; required for polarity establishment, apical bud growth, shmoo formation, filamentous differentiation; involved in Bni1p localization at sites of polarized growth, controlling polarized assembly of actin cables; role in apical growth affects diploid-specifi…	-	-	-	-	-	-	-	-	-	-	9	-	-	1
	RCY1	RCY1 SGDID:S000003740, Chr X from 53151-50629, Genome Release 64-2-1, reverse complement, Verified ORF, "F-box protein involved in recycling endocytosed proteins; involved in recycling plasma membrane proteins internalized by endocytosis; localized to sites of polarized growth; direct interaction with C-terminal cytoplasmic region of Drs2p plays an important role for Drs2p function in endocytic r…	-	-	-	-	-	-	-	-	-	-	9	-	-	1
	SET3	SET3 SGDID:S000001737, Chr XI from 499833-497578, Genome Release 64-2-1, reverse complement, Verified ORF, "Defining member of the SET3 histone deacetylase complex; which is a meiosis-specific repressor of sporulation genes; necessary for efficient transcription by RNAPII; one of two yeast proteins that contains both SET and PHD domains; SET3 has a paralog, SET4, that arose from the whole genome …	-	-	-	-	-	-	-	-	-	-	8	-	-	1
	AIM9	AIM9 SGDID:S000000882, Chr V from 319963-321846, Genome Release 64-2-1, Verified ORF, "Putative protein of unknown function; the authentic, non-tagged protein is detected in highly purified mitochondria in high-throughput studies; null mutant displays elevated frequency of mitochondrial genome loss"	-	-	-	-	-	-	-	-	-	-	12	-	-	1
	TOD6	TOD6 SGDID:S000000150, Chr II from 117589-119166, Genome Release 64-2-1, Verified ORF, "PAC motif binding protein involved in rRNA and ribosome biogenesis; subunit of the RPD3L histone deacetylase complex; Myb-like HTH transcription factor; hypophosphorylated by rapamycin treatment in a Sch9p-dependent manner; activated in stochastic pulses of nuclear localization"	-	-	-	-	-	-	-	-	-	-	10	-	-	1
	RPF2	RPF2 SGDID:S000001789, Chr XI from 592540-591506, Genome Release 64-2-1, reverse complement, Verified ORF, "Essential protein involved in rRNA maturation and ribosomal assembly; involved in the processing of pre-rRNA and the assembly of the 60S ribosomal subunit; interacts with ribosomal protein L11; localizes predominantly to the nucleolus; constituent of 66S pre-ribosomal particles"	-	-	-	-	-	-	-	-	-	-	11	-	-	1
	SYO1	SYO1 SGDID:S000002221, Chr IV from 340134-338272, Genome Release 64-2-1, reverse complement, Verified ORF, "Transport adaptor or symportin; facilitates synchronized nuclear coimport of the two 5S-rRNA binding proteins Rpl5p and Rpl11p; required for biogenesis of the large ribosomal subunit; green fluorescent protein (GFP)-fusion protein localizes to the cytoplasm and nucleus"	-	-	-	-	-	-	-	-	-	-	8	-	-	1
	SEC9	SEC9 SGDID:S000003241, Chr VII from 511002-509047, Genome Release 64-2-1, reverse complement, Verified ORF, "t-SNARE protein required for secretory vesicle-plasma membrane fusion; similar to but not functionally redundant with Spo20p; interacts non-exocyst bound Sec6p; SNAP-25 homolog"	-	-	-	-	-	-	-	-	-	-	9	-	-	1
	DSL1	DSL1 SGDID:S000005202, Chr XIV from 160373-158109, Genome Release 64-2-1, reverse complement, Verified ORF, "Peripheral membrane protein needed for Golgi-to-ER retrograde traffic; forms a complex with Sec39p and Tip20p that interacts with ER SNAREs Sec20p and Use1p; component of the ER target site that interacts with coatomer; interacts with Cin5p; similar to the fly and human ZW10 gene"	-	-	-	-	-	-	-	-	-	-	9	-	-	1
	LHS1	LHS1 SGDID:S000001556, Chr XI from 296430-299075, Genome Release 64-2-1, Verified ORF, "Molecular chaperone of the endoplasmic reticulum lumen; involved in polypeptide translocation and folding; nucleotide exchange factor for the ER lumenal Hsp70 chaperone Kar2p; regulated by the unfolded protein response pathway"	-	-	-	-	-	-	-	-	-	-	10	-	-	1
	BRE1	BRE1 SGDID:S000002232, Chr IV from 326149-324047, Genome Release 64-2-1, reverse complement, Verified ORF, "E3 ubiquitin ligase; forms heterodimer with Rad6p to monoubiquinate histone H2B-K123, which is required for the subsequent methylation of histone H3-K4 and H3-K79; required for DSBR, transcription, silencing, and checkpoint control; interacts with RNA-binding protein Npl3p, linking histone …	-	-	-	-	-	-	-	-	-	-	7	-	-	1
	EFM2	EFM2 SGDID:S000000475, Chr II from 744852-746111, Genome Release 64-2-1, Verified ORF, "S-adenosylmethionine-dependent methyltransferase; seven-beta-strand lysine methyltransferase which dimethylates translation elongation factor EF2 (Eft1p and Eft2p) at lysine 613 and methylates EF3 (Yef3p) at lysine 187; green fluorescent protein (GFP)-fusion protein localizes to the cytoplasm; involved in regu…	-	-	-	-	-	-	-	-	-	-	8	-	-	1
	VPS4	VPS4 SGDID:S000006377, Chr XVI from 887837-886524, Genome Release 64-2-1, reverse complement, Verified ORF, "AAA-ATPase involved in multivesicular body (MVB) protein sorting; ATP-bound Vps4p localizes to endosomes and catalyzes ESCRT-III disassembly and membrane release; ATPase activity is activated by Vta1p; regulates cellular sterol metabolism"	-	-	-	-	-	-	-	-	-	-	7	-	-	1
	PUB1	PUB1 SGDID:S000004961, Chr XIV from 602907-604268, Genome Release 64-2-1, Verified ORF, "Poly (A)+ RNA-binding protein; abundant mRNP-component protein that binds mRNA and is required for stability of many mRNAs; component of glucose deprivation induced stress granules, involved in P-body-dependent granule assembly; protein abundance increases in response to DNA replication stress"	-	-	-	-	-	-	-	-	-	-	7	-	-	1
	SDS24	SDS24 SGDID:S000000418, Chr II from 651415-652998, Genome Release 64-2-1, Verified ORF, "Protein involved in cell separation during budding; one of two S. cerevisiae homologs (Sds23p and Sds24p) of the S. pombe Sds23 protein, which is implicated in APC/cyclosome regulation; may play an indirect role in fluid-phase endocytosis; protein abundance increases in response to DNA replication stress; SDS…	-	-	-	-	-	-	-	-	-	-	8	-	-	1
	SCC2	SCC2 SGDID:S000002588, Chr IV from 821295-825776, Genome Release 64-2-1, Verified ORF, "Subunit of cohesin loading factor (Scc2p-Scc4p); a complex required for loading of cohesin complexes onto chromosomes; involved in establishing sister chromatid cohesion during DSB repair via histone H2AX; evolutionarily-conserved adherin; relocalizes to the cytosol in response to hypoxia"	-	-	-	-	-	-	-	-	-	-	9	-	-	1
	COG1	COG1 SGDID:S000003191, Chr VII from 80365-79112, Genome Release 64-2-1, reverse complement, Verified ORF, "Essential component of the conserved oligomeric Golgi complex; a cytosolic tethering complex (Cog1p through Cog8p) that functions in protein trafficking to mediate fusion of transport vesicles to Golgi compartments"	-	-	-	-	-	-	-	-	-	-	8	-	-	1
	RRP4	RRP4 SGDID:S000001111, Chr VIII from 234658-233579, Genome Release 64-2-1, reverse complement, Verified ORF, "Exosome non-catalytic core component; involved in 3'-5' RNA processing and degradation in both the nucleus and the cytoplasm; predicted to contain RNA binding domains; has similarity to human hRrp4p (EXOSC2)"	-	-	-	-	-	-	-	-	-	-	7	-	-	1
	KIP3	KIP3 SGDID:S000003184, Chr VII from 84885-87302, Genome Release 64-2-1, Verified ORF, "Kinesin-related antiparallel sliding motor protein; involved in mitotic spindle positioning; sliding activity promotes bipolar spindle assembly and maintenance of genome stability; inhibits spindle elongation, destabilizing late anaphase spindle microtubules that polymerize beyond the midzone"	-	-	-	-	-	-	-	-	-	-	8	-	-	1
	DRE2	DRE2 SGDID:S000001779, Chr XI from 575980-574934, Genome Release 64-2-1, reverse complement, Verified ORF, "Component of the cytosolic Fe-S protein assembly (CIA) machinery; contains an Fe-S cluster that receives electrons from NADPH via the action of Tah18pin an early step in the CIA pathway; ortholog of human Ciapin1; protein abundance increases in response to DNA replication stress"	-	-	-	-	-	-	-	-	-	-	7	-	-	1
	RGA1	RGA1 SGDID:S000005653, Chr XV from 561170-564193, Genome Release 64-2-1, Verified ORF, "GTPase-activating protein for polarity-establishment protein Cdc42p; implicated in control of septin organization, pheromone response, and haploid invasive growth; relocalizes from bud neck to cytoplasm upon DNA replication stress; RGA1 has a paralog, RGA2, that arose from the whole genome duplication"	-	-	-	-	-	-	-	-	-	-	6	-	-	1
	MET7	MET7 SGDID:S000005767, Chr XV from 786995-788641, Genome Release 64-2-1, Verified ORF, "Folylpolyglutamate synthetase; catalyzes extension of the glutamate chains of the folate coenzymes, required for methionine synthesis and for maintenance of mitochondrial DNA; protein abundance increases in response to DNA replication stress"	-	-	-	-	-	-	-	-	-	-	9	-	-	1
	NOT5	NOT5 SGDID:S000006276, Chr XVI from 690107-691789, Genome Release 64-2-1, Verified ORF, "Subunit of CCR4-NOT global transcriptional regulator; involved intranscription initiation and elongation and in mRNA degradation; conserved lysine in human homolog of Not5p and Not3p is mutated in cancers"	-	-	-	-	-	-	-	-	-	-	8	-	-	1
	PDX1	PDX1 SGDID:S000003425, Chr VII from 885741-884509, Genome Release 64-2-1, reverse complement, Verified ORF, "E3-binding protein of the mitochondrial pyruvate dehydrogenase complex; plays a structural role in the complex by binding and positioning dihydrolipoamide dehydrogenase (E3) to the dihydrolipoamide acetyltransferase (E2) core"	-	-	-	-	-	-	-	-	-	-	7	-	-	1
	COG5	COG5 SGDID:S000004996, Chr XIV from 532659-533870, Genome Release 64-2-1, Verified ORF, "Component of the conserved oligomeric Golgi complex; a cytosolic tethering complex (Cog1p through Cog8p) that functions in protein trafficking to mediate fusion of transport vesicles to Golgi compartments"	-	-	-	-	-	-	-	-	-	-	6	-	-	1
	ORC5	ORC5 SGDID:S000005205, Chr XIV from 155100-156539, Genome Release 64-2-1, Verified ORF, "Subunit of the origin recognition complex (ORC); ORC directs DNA replication by binding to replication origins and is also involved in transcriptional silencing"	-	-	-	-	-	-	-	-	-	-	7	-	-	1
	CCA1	CCA1 SGDID:S000000970, Chr V from 522669-521029, Genome Release 64-2-1, reverse complement, Verified ORF, "ATP (CTP):tRNA-specific tRNA nucleotidyltransferase; different forms targeted to the nucleus, cytosol, and mitochondrion are generated via the use of multiple transcriptional and translational start sites"	-	-	-	-	-	-	-	-	-	-	6	-	-	1
	UBP13	UBP13 SGDID:S000000163, Chr II from 95882-93639, Genome Release 64-2-1, reverse complement, Verified ORF, "Ubiquitin-specific protease that cleaves Ub-protein fusions; UBP13 has a paralog, UBP9, that arose from the whole genome duplication"	-	-	-	-	-	-	-	-	-	-	6	-	-	1
	LAP3	LAP3 SGDID:S000005183, Chr XIV from 200569-201933, Genome Release 64-2-1, Verified ORF, "Cysteine aminopeptidase with homocysteine-thiolactonase activity; protects cells against homocysteine toxicity; has bleomycin hydrolase activity in vitro; transcription is regulated by galactose via Gal4p; orthologous to human BLMH"	-	-	-	-	-	-	-	-	-	-	6	-	-	1
	NUP1	NUP1 SGDID:S000005624, Chr XV from 511178-507948, Genome Release 64-2-1, reverse complement, Verified ORF, "FG-nucleoporin component of central core of the nuclear pore complex; contributes directly to nucleocytoplasmic transport and maintenance of thenuclear pore complex (NPC) permeability barrier; possible karyopherin release factor that accelerates release of karyopherin-cargo complexes after …	-	-	-	-	-	-	-	-	-	-	8	-	-	1
	UBX5	UBX5 SGDID:S000002738, Chr IV from 1127872-1129374, Genome Release 64-2-1, Verified ORF, "UBX domain-containing protein that interacts with Cdc48p; ubiquitin regulatory X is also known as UBX"	-	-	-	-	-	-	-	-	-	-	7	-	-	1
	MLF3	MLF3 SGDID:S000005018, Chr XIV from 488124-486766, Genome Release 64-2-1, reverse complement, Verified ORF, "Serine-rich protein of unknown function; predicted to be palmitoylated; overproduction suppresses growth inhibition caused by exposure to immunosuppressant leflunomide; MLF3 has a paralog, VHS2, that arose from the whole genome duplication"	-	-	-	-	-	-	-	-	-	-	6	-	-	1
	BNI4	BNI4 SGDID:S000005177, Chr XIV from 211922-214600, Genome Release 64-2-1, Verified ORF, "Targeting subunit for Glc7p protein phosphatase; localized to the bud neck, required for localization of chitin synthase III to the bud neck via interaction with the chitin synthase III regulatory subunit Skt5p"	-	-	-	-	-	-	-	-	-	-	7	-	-	1
	THR1	THR1 SGDID:S000001067, Chr VIII from 159438-160511, Genome Release 64-2-1, Verified ORF, "Homoserine kinase; conserved protein required for threonine biosynthesis; long-lived protein that is preferentially retained in mother cells and forms cytoplasmic filaments; expression is regulated by the GCN4-mediated general amino acid control pathway"	-	-	-	-	-	-	-	-	-	-	7	-	-	1
	PUF2	PUF2 SGDID:S000006246, Chr XVI from 653662-650435, Genome Release 64-2-1, reverse complement, Verified ORF, "PUF family mRNA-binding protein; Pumilio homology domain confers RNA binding activity; preferentially binds mRNAs encoding membrane-associated proteins; binding site composed of two UAAU tetranucleotides, separated by a 3-nt linker; PUF2 has a paralog, JSN1, that arose from the whole genom…	-	-	-	-	-	-	-	-	-	-	6	-	-	1
	CAF120	CAF120 SGDID:S000005222, Chr XIV from 113271-116453, Genome Release 64-2-1, Verified ORF, "Part of the CCR4-NOT transcriptional regulatory complex; involved in controlling mRNA initiation, elongation, and degradation; CAF120 has a paralog, SKG3, that arose from the whole genome duplication"	-	-	-	-	-	-	-	-	-	-	7	-	-	1
	KIC1	KIC1 SGDID:S000001144, Chr VIII from 316572-319814, Genome Release 64-2-1, Verified ORF, "Protein kinase of the PAK/Ste20 family, required for cell integrity; physically interacts with Cdc31p (centrin), which is a component of the spindle pole body; part of the RAM network that regulates cellular polarity and morphogenesis"	-	-	-	-	-	-	-	-	-	-	7	-	-	1
	RAD23	RAD23 SGDID:S000000763, Chr V from 82603-81407, Genome Release 64-2-1, reverse complement, Verified ORF, "Protein with ubiquitin-like N terminus; subunit of Nuclear Excision Repair Factor 2 (NEF2) with Rad4p that binds damaged DNA; enhances protein deglycosylation activity of Png1p; also involved, with Rad4p, in ubiquitylated protein turnover"	-	-	-	-	-	-	-	-	-	-	8	-	-	1
	ATG11	ATG11 SGDID:S000006253, Chr XVI from 664673-661137, Genome Release 64-2-1, reverse complement, Verified ORF, "Adapter protein for pexophagy and the Cvt targeting pathway; directs receptor-bound cargo to the phagophore assembly site (PAS) for packaging into vesicles; required for recruiting other proteins to the PAS; recruits Dnm1p to facilitate fission of mitochondria that are destined for remova…	-	-	-	-	-	-	-	-	-	-	6	-	-	1
	GIP3	GIP3 SGDID:S000006058, Chr XVI from 296647-292817, Genome Release 64-2-1, reverse complement, Verified ORF, "Cytoplasmic protein that regulates protein phosphatase 1 Glc7p; overexpression relocalizes Glc7p from the nucleus and prevents chromosome segregation; may interact with ribosomes, based on co-purification experiments; GIP3 has a paralog, HER1, that arose from the whole genome duplication"	-	-	-	-	-	-	-	-	-	-	10	-	-	1
	GLO3	GLO3 SGDID:S000000924, Chr V from 404352-402871, Genome Release 64-2-1, reverse complement, Verified ORF, "ADP-ribosylation factor GTPase activating protein (ARF GAP); involved in ER-Golgi transport; shares functional similarity with Gcs1p"	-	-	-	-	-	-	-	-	-	-	8	-	-	1
	REF2	REF2 SGDID:S000002603, Chr IV from 848599-850200, Genome Release 64-2-1, Verified ORF, "RNA-binding protein; involved in the cleavage step of mRNA 3'-end formation prior to polyadenylation, and in snoRNA maturation; part of holo-CPF subcomplex APT, which associates with 3'-ends of snoRNA- and mRNA-encoding genes; relocalizes to the cytosol in response to hypoxia"	-	-	-	-	-	-	-	-	-	-	6	-	-	1
	SYF1	SYF1 SGDID:S000002824, Chr IV from 1298432-1301011, Genome Release 64-2-1, Verified ORF, "Member of the NineTeen Complex (NTC); that contains Prp19p and stabilizes U6 snRNA in catalytic forms of the spliceosome containing U2, U5, and U6 snRNAs; null mutant has splicing defect and arrests in G2/M; relocalizes to the cytosol in response to hypoxia; homologs in human and C. elegans"	-	-	-	-	-	-	-	-	-	-	7	-	-	1
	LEU9	LEU9 SGDID:S000005634, Chr XV from 523027-524841, Genome Release 64-2-1, Verified ORF, "Alpha-isopropylmalate synthase II (2-isopropylmalate synthase); catalyzes the first step in the leucine biosynthesis pathway; the minor isozyme, responsible for the residual alpha-IPMS activity detected in a leu4 null mutant; LEU9 has a paralog, LEU4, that arose from the whole genome duplication"	-	-	-	-	-	-	-	-	-	-	6	-	-	1
	NIP7	NIP7 SGDID:S000006132, Chr XVI from 153495-154040, Genome Release 64-2-1, Verified ORF, "Nucleolar protein required for 60S ribosome subunit biogenesis; constituent of 66S pre-ribosomal particles; physically interacts with Nop8p and the exosome subunit Rrp43p"	-	-	-	-	-	-	-	-	-	-	8	-	-	1
	SMC4	SMC4 SGDID:S000004076, Chr XII from 302243-306499, Genome Release 64-2-1, Verified ORF, "Subunit of the condensin complex; condensin reorganizes chromosomes during both mitosis and meiosis; forms a subcomplex with Smc2p that has ATP-hydrolyzing and DNA-binding activity, but other condensin subunits are required for chromatin binding; required for tRNA gene clustering at the nucleolus; potential C…	-	-	-	-	-	-	-	-	-	-	6	-	-	1
	RPO41	RPO41 SGDID:S000001858, Chr VI from 58782-62837, Genome Release 64-2-1, Verified ORF, "Mitochondrial RNA polymerase; single subunit enzyme similar to those of T3 and T7 bacteriophages; requires a specificity subunit encoded by MTF1 for promoter recognition; Mtf1p interacts with and stabilizes the Rpo41p-promoter complex, enhancing DNA bending and melting to facilitate pre-initiation open complex …	-	-	-	-	-	-	-	-	-	-	7	-	-	1
	EAP1	EAP1 SGDID:S000001687, Chr XI from 53704-55602, Genome Release 64-2-1, Verified ORF, "eIF4E-associated protein, competes with eIF4G for binding to eIF4E; accelerates mRNA degradation by promoting decapping, facilitated by interaction with eIF4E; essential for Puf5p mediated repression; associates with Puf5p and Dhh1p; inhibits cap-dependent translation; functions independently of eIF4E to maintai…	-	-	-	-	-	-	-	-	-	-	8	-	-	1
	SAK1	SAK1 SGDID:S000000931, Chr V from 417281-420709, Genome Release 64-2-1, Verified ORF, "Upstream serine/threonine kinase for the SNF1 complex; plays a role in pseudohyphal groth; partially redundant with Elm1p and Tos3p; members of this family have functional orthology with LKB1, a mammalian kinase associated with Peutz-Jeghers cancer-susceptibility syndrome; SAK1 has a paralog, TOS3, that arose f…	-	-	-	-	-	-	-	-	-	-	7	-	-	1
	NMA1	NMA1 SGDID:S000004320, Chr XII from 784913-786118, Genome Release 64-2-1, Verified ORF, "Nicotinic acid mononucleotide adenylyltransferase; catalyzes the transfer of the adenylyl moiety of ATP to nicotinamide mononucleotide to form NAD; involved in pathways of NAD biosynthesis, including the de novo, NAD(+) salvage, and nicotinamide riboside salvage pathways; homolog of human NMNAT; NMA1 has a pa…	-	-	-	-	-	-	-	-	-	-	6	-	-	1
	ENV11	ENV11 SGDID:S000003303, Chr VII from 634063-631481, Genome Release 64-2-1, reverse complement, Verified ORF, "Protein proposed to be involved in vacuolar functions; mutant shows defect in CPY processing and fragmented vacuoles; deletion mutant has increased glycogen accumulation and displays elongated buds; green fluorescent protein (GFP)-fusion protein localizes to the nucleus; ENV11 has a paral…	-	-	-	-	-	-	-	-	-	-	6	-	-	1
	VPS8	VPS8 SGDID:S000000002, Chr I from 143707-147531, Genome Release 64-2-1, Verified ORF, "Membrane-binding component of the CORVET complex; involved in endosomal vesicle tethering and fusion in the endosome to vacuole protein targeting pathway; interacts with Vps21p; contains RING finger motif"	-	-	-	-	-	-	-	-	-	-	7	-	-	1
	NIF3	NIF3 SGDID:S000003189, Chr VII from 82292-81426, Genome Release 64-2-1, reverse complement, Verified ORF, "Protein of unknown function; similar to Listeria monocytogenes major sigma factor (rpoD gene product); the authentic, non-tagged protein is detected in highly purified mitochondria in high-throughput studies"	-	-	-	-	-	-	-	-	-	-	6	-	-	1
	NDC80	NDC80 SGDID:S000001406, Chr IX from 78074-80149, Genome Release 64-2-1, Verified ORF, "Component of the kinetochore-associated Ndc80 complex; conserved coiled-coil protein involved in chromosome segregation, spindle checkpoint activity, and kinetochore assembly and clustering; evolutionarily conserved; other members include Ndc80p, Nuf2p, Scp24p, and Spc25p; modified by sumoylation"	-	-	-	-	-	-	-	-	-	-	11	-	-	1
	MDY2	MDY2 SGDID:S000005471, Chr XV from 108896-108258, Genome Release 64-2-1, reverse complement, Verified ORF, "Protein involved in inserting tail-anchored proteins into ER membranes; forms a complex with Get4p; required for efficient mating; involved in shmoo formation and nuclear migration in the pre-zygote; associates with ribosomes"	-	-	-	-	-	-	-	-	-	-	6	-	-	1
	VPS33	VPS33 SGDID:S000004388, Chr XII from 912310-910235, Genome Release 64-2-1, reverse complement, Verified ORF, "ATP-binding protein that is a subunit of the HOPS and CORVET complexes; essential for protein sorting, vesicle docking, and fusion at the vacuole; binds to SNARE domains"	-	-	-	-	-	-	-	-	-	-	6	-	-	1
	PRP2	PRP2 SGDID:S000005294, Chr XIV from 646950-644320, Genome Release 64-2-1, reverse complement, Verified ORF, "RNA-dependent DExD/H-box ATPase; required for activation of spliceosome before first transesterification step in RNA splicing; implicated in rearranging and proofreading snRNA structure in catalytic activation of spliceosome; ortholog of human protein DHX16"	-	-	-	-	-	-	-	-	-	-	9	-	-	1
	PEX1	PEX1 SGDID:S000001680, Chr XI from 73865-70734, Genome Release 64-2-1, reverse complement, Verified ORF, "AAA-peroxin; heterodimerizes with AAA-peroxin Pex6p and participates in the recycling of peroxisomal signal receptor Pex5p from the peroxisomal membrane to the cystosol; induced by oleic acid and upregulated during anaerobiosis"	-	-	-	-	-	-	-	-	-	-	7	-	-	1
	MED1	MED1 SGDID:S000006274, Chr XVI from 685898-687598, Genome Release 64-2-1, Verified ORF, "Subunit of the RNA polymerase II mediator complex; associates with core polymerase subunits to form the RNA polymerase II holoenzyme; essential for transcriptional regulation"	-	-	-	-	-	-	-	-	-	-	10	-	-	1
	RIM15	RIM15 SGDID:S000001861, Chr VI from 74427-69115, Genome Release 64-2-1, reverse complement, Verified ORF, "Protein kinase involved in cell proliferation in response to nutrients; glucose-repressible; involved in signal transduction during cell proliferation in response to nutrients, specifically the establishment of stationary phase; identified as a regulator of IME2; phosphorylates Igo1p and Igo…	-	-	-	-	-	-	-	-	-	-	7	-	-	1
	BUL1	BUL1 SGDID:S000004888, Chr XIII from 818581-815651, Genome Release 64-2-1, reverse complement, Verified ORF, "Ubiquitin-binding component of the Rsp5p E3-ubiquitin ligase complex; disruption causes temperature-sensitive growth, overexpression causes missorting of amino acid permeases; BUL1 has a paralog, BUL2, that arose from the whole genome duplication"	-	-	-	-	-	-	-	-	-	-	6	-	-	1
	TPK3	TPK3 SGDID:S000001649, Chr XI from 135705-134509, Genome Release 64-2-1, reverse complement, Verified ORF, "cAMP-dependent protein kinase catalytic subunit; promotes vegetative growth in response to nutrients via the Ras-cAMP signaling pathway; partially redundant with Tpk1p and Tpk2p; localizes to P-bodies during stationary phase; TPK3 has a paralog, TPK1, that arose from the whole genome duplic…	-	-	-	-	-	-	-	-	-	-	6	-	-	1
	SMC5	SMC5 SGDID:S000005394, Chr XV from 259923-263204, Genome Release 64-2-1, Verified ORF, "Component of the SMC5-SMC6 complex; this complex plays a key role in the removal of X-shaped DNA structures that arise between sister chromatids during DNA replication and repair; binds single-stranded DNA and has ATPase activity; S. pombe homolog forms a heterodimer with S. pombe Rad18p that is involved in DN…	-	-	-	-	-	-	-	-	-	-	6	-	-	1
	MSS4	MSS4 SGDID:S000002616, Chr IV from 868224-870563, Genome Release 64-2-1, Verified ORF, "Phosphatidylinositol-4-phosphate 5-kinase; involved in actin cytoskeleton organization and cell morphogenesis; multicopy suppressor of stt4 mutation"	-	-	-	-	-	-	-	-	-	-	6	-	-	1
	PRR1	PRR1 SGDID:S000001599, Chr XI from 222900-221344, Genome Release 64-2-1, reverse complement, Verified ORF, "Serine/threonine protein kinase; inhibits pheromone induced signaling downstream of MAPK, possibly at the level of the Ste12p transcription factor"	-	-	-	-	-	-	-	-	-	-	7	-	-	1
	FCP1	FCP1 SGDID:S000004890, Chr XIII from 820256-822454, Genome Release 64-2-1, Verified ORF, "Carboxy-terminal domain (CTD) phosphatase; essential for dephosphorylation of the repeated C-terminal domain of the RNA polymerase II large subunit (Rpo21p); relocalizes to the cytosol in response to hypoxia"	-	-	-	-	-	-	-	-	-	-	6	-	-	1
	TMA108	TMA108 SGDID:S000001399, Chr IX from 92788-89948, Genome Release 64-2-1, reverse complement, Verified ORF, "Ribosome-associated protein that is involved in ribosome biogenesis; putative metalloprotease"	-	-	-	-	-	-	-	-	-	-	8	-	-	1
	PDR1	PDR1 SGDID:S000002981, Chr VII from 472298-469092, Genome Release 64-2-1, reverse complement, Verified ORF, "Transcription factor that regulates the pleiotropic drug response; zinc cluster protein that is a master regulator involved in recruiting other zinc cluster proteins to pleiotropic drug response elements (PDREs) to fine tune the regulation of multidrug resistance genes; relocalizes to the …	-	-	-	-	-	-	-	-	-	-	6	-	-	1
	VPS25	VPS25 SGDID:S000003863, Chr X from 619765-619157, Genome Release 64-2-1, reverse complement, Verified ORF, "Component of the ESCRT-II complex; ESCRT-II is involved in ubiquitin-dependent sorting of proteins into the endosome"	-	-	-	-	-	-	-	-	-	-	7	-	-	1
	PRO1	PRO1 SGDID:S000002708, Chr IV from 1062791-1061505, Genome Release 64-2-1, reverse complement, Verified ORF, "Gamma-glutamyl kinase; catalyzes the first step in proline biosynthesis; PRO1 has a paralog, YHR033W, that arose from the whole genome duplication"	-	-	-	-	-	-	-	-	-	-	6	-	-	1
	WTM1	WTM1 SGDID:S000005756, Chr XV from 770800-772113, Genome Release 64-2-1, Verified ORF, "Transcriptional modulator; involved in regulation of meiosis, silencing, and expression of RNR genes; required for nuclear localization of the ribonucleotide reductase small subunit Rnr2p and Rnr4p; contains WD repeats"	-	-	-	-	-	-	-	-	-	-	6	-	-	1
	MCD1	MCD1 SGDID:S000002161, Chr IV from 444683-446383, Genome Release 64-2-1, Verified ORF, "Essential alpha-kleisin subunit of the cohesin complex; required for sister chromatid cohesion in mitosis and meiosis; apoptosis induces cleavage and translocation of a C-terminal fragment to mitochondria; expression peaks in S phase"	-	-	-	-	-	-	-	-	-	-	8	-	-	1
	NMA111	NMA111 SGDID:S000005067, Chr XIV from 394685-397678, Genome Release 64-2-1, Verified ORF, "Serine protease and general molecular chaperone; involved in response to heat stress and promotion of apoptosis; may contribute to lipid homeostasis; sequence similarity to the mammalian Omi/HtrA2 family of serine proteases"	-	-	-	-	-	-	-	-	-	-	6	-	-	1
	GIR2	GIR2 SGDID:S000002559, Chr IV from 765706-766503, Genome Release 64-2-1, Verified ORF, "Highly-acidic RWD domain-containing protein of unknown function; cytoplasmic; forms a complex with Rbg2p; interacts with Rbg1p and Gcn1p; associates with translating ribosomes; putative intrinsically unstructured protein"	-	-	-	-	-	-	-	-	-	-	6	-	-	1
	PRE10	PRE10 SGDID:S000005889, Chr XV from 1018746-1017880, Genome Release 64-2-1, reverse complement, Verified ORF, "Alpha 7 subunit of the 20S proteasome; protein abundance increases in response to DNA replication stress"	-	-	-	-	-	-	-	-	-	-	6	-	-	1
	SOK1	SOK1 SGDID:S000002413, Chr IV from 461247-458542, Genome Release 64-2-1, reverse complement, Verified ORF, "Protein of unknown function; overexpression suppresses the growth defect of mutants lacking protein kinase A activity; involved in cAMP-mediated signaling; localized to the nucleus; similar to the mouse testis-specific protein PBS13"	-	-	-	-	-	-	-	-	-	-	7	-	-	1
	MSC6	MSC6 SGDID:S000005881, Chr XV from 1003225-1001147, Genome Release 64-2-1, reverse complement, Verified ORF, "Protein of unknown function; mutant is defective in directing meiotic recombination events to homologous chromatids; the authentic, non-tagged protein is detected in highly purified mitochondria in high-throughput studies"	-	-	-	-	-	-	-	-	-	-	6	-	-	1
	PCL6	PCL6 SGDID:S000000861, Chr V from 272624-273886, Genome Release 64-2-1, Verified ORF, "Pho85p cyclin of the Pho80p subfamily; forms the major Glc8p kinase together with Pcl7p and Pho85p; involved in the control of glycogen storage by Pho85p; stabilized by Elongin C binding; PCL6 has a paralog, PCL7, that arose from the whole genome duplication"	-	-	-	-	-	-	-	-	-	-	7	-	-	1
	RTT10	RTT10 SGDID:S000006104, Chr XVI from 202536-199495, Genome Release 64-2-1, reverse complement, Verified ORF, "WD40 domain-containing protein involved in endosomal recycling; forms a complex with Rrt2p that functions in the retromer-mediated pathway for recycling internalized cell-surface proteins; evidence it interacts with Trm7p for 2'-O-methylation of N34 of substrate tRNAs; has a role in regul…	-	-	-	-	-	-	-	-	-	-	7	-	-	1
	CWC22	CWC22 SGDID:S000003510, Chr VII from 1046731-1048464, Genome Release 64-2-1, Verified ORF, "Spliceosome-associated protein that is required for pre-mRNA splicing; necessary for Prp2p function at the first catalytic step of splicing; has similarity to S. pombe Cwf22p; CWC22 is an essential protein"	-	-	-	-	-	-	-	-	-	-	6	-	-	1
	THO2	THO2 SGDID:S000005083, Chr XIV from 365717-360924, Genome Release 64-2-1, reverse complement, Verified ORF, "Subunit of the THO complex; THO is required for efficient transcription elongation and involved in transcriptional elongation-associated recombination; required for LacZ RNA expression from certain plasmids"	-	-	-	-	-	-	-	-	-	-	7	-	-	1
	VPS3	VPS3 SGDID:S000002903, Chr IV from 1441150-1438115, Genome Release 64-2-1, reverse complement, Verified ORF, "Component of CORVET membrane tethering complex; cytoplasmic protein required for the sorting and processing of soluble vacuolar proteins, acidification of the vacuolar lumen, and assembly of the vacuolar H+-ATPase"	-	-	-	-	-	-	-	-	-	-	7	-	-	1
	PCF11	PCF11 SGDID:S000002636, Chr IV from 923806-921926, Genome Release 64-2-1, reverse complement, Verified ORF, "mRNA 3' end processing factor; essential component of cleavage and polyadenylation factor IA (CF IA), involved in pre-mRNA 3' end processing and in transcription termination; binds C-terminal domain of largest subunit of RNA pol II (Rpo21p); required for gene looping; relocalizes to the cy…	-	-	-	-	-	-	-	-	-	-	6	-	-	1
	PRI2	PRI2 SGDID:S000001528, Chr XI from 353493-355079, Genome Release 64-2-1, Verified ORF, "Subunit of DNA primase; DNA primase is required for DNA synthesis and double-strand break repair"	-	-	-	-	-	-	-	-	-	-	6	-	-	1
	DBP5	DBP5 SGDID:S000005572, Chr XV from 415907-414459, Genome Release 64-2-1, reverse complement, Verified ORF, "Cytoplasmic ATP-dependent RNA helicase of the DEAD-box family; involved in mRNA export from the nucleus, remodeling messenger ribonucleoprotein particles (mRNPs), with ATPase activity stimulated by Gle1p, IP6 and Nup159p; involved in translation termination along with Sup45p (eRF1); role in…	-	-	-	-	-	-	-	-	-	-	-	24	-	1
	DCP2	DCP2 SGDID:S000005062, Chr XIV from 405564-402652, Genome Release 64-2-1, reverse complement, Verified ORF, "Catalytic subunit of the Dcp1p-Dcp2p decapping enzyme complex; removes the 5' cap structure from mRNAs prior to their degradation; also enters the nucleus and positively regulates transcription initiation; nudix hydrolase family member; forms cytoplasmic foci upon DNA replication stress"	-	-	-	-	-	-	-	-	-	-	-	16	-	1
	PAN1	PAN1 SGDID:S000001445, Chr IX from 369908-365466, Genome Release 64-2-1, reverse complement, Verified ORF, "Part of actin cytoskeleton-regulatory complex Pan1p-Sla1p-End3p; associates with actin patches on cell cortex; promotes protein-protein interactions essential for endocytosis; binds to and activates Arp2/3 complex in vitro; phosphorylation of Thr-1225 is regulated by MAPK Hog1p in response …	-	-	-	-	-	-	-	-	-	-	-	15	-	1
	RNR1	RNR1 SGDID:S000000872, Chr V from 298950-301616, Genome Release 64-2-1, Verified ORF, "Major isoform of large subunit of ribonucleotide-diphosphate reductase; the RNR complex catalyzes rate-limiting step in dNTP synthesis, regulated by DNA replication and DNA damage checkpoint pathways via localization of small subunits; relative distribution to the nucleus increases upon DNA replication stress; …	-	-	-	-	-	-	-	-	-	-	-	16	-	1
	MCM3	MCM3 SGDID:S000000758, Chr V from 86937-89852, Genome Release 64-2-1, Verified ORF, "Protein involved in DNA replication; component of the Mcm2-7 hexameric helicase complex that binds chromatin as a part of the pre-replicative complex"	-	-	-	-	-	-	-	-	-	-	-	17	-	1
	PBP1	PBP1 SGDID:S000003410, Chr VII from 853215-851047, Genome Release 64-2-1, reverse complement, Verified ORF, "Component of glucose deprivation induced stress granules; involved in P-body-dependent granule assembly; similar to human ataxin-2; interacts with Pab1p to regulate mRNA polyadenylation; interacts with Mkt1p to regulate HO translation; protein increases in abundance and relative distributi…	-	-	-	-	-	-	-	-	-	-	-	12	-	1
	LCB1	LCB1 SGDID:S000004911, Chr XIII from 860891-859215, Genome Release 64-2-1, reverse complement, Verified ORF, "Component of serine palmitoyltransferase; responsible along with Lcb2p for the first committed step in sphingolipid synthesis, which is the condensation of serine with palmitoyl-CoA to form 3-ketosphinganine"	-	-	-	-	-	-	-	-	-	-	-	13	-	1
	BBC1	BBC1 SGDID:S000003557, Chr X from 402410-398937, Genome Release 64-2-1, reverse complement, Verified ORF, "Protein possibly involved in assembly of actin patches; interacts with an actin assembly factor Las17p and with the SH3 domains of Type I myosins Myo3p and Myo5p; localized predominantly to cortical actin patches"	-	-	-	-	-	-	-	-	-	-	-	18	-	1
	LSG1	LSG1 SGDID:S000003067, Chr VII from 314631-316553, Genome Release 64-2-1, Verified ORF, "Putative GTPase involved in 60S ribosomal subunit biogenesis; required for the release of Nmd3p from 60S subunits in the cytoplasm"	-	-	-	-	-	-	-	-	-	-	-	10	-	1
	RPL17B	RPL17B SGDID:S000003713, Chr X from 90786-91094,91412-91657, Genome Release 64-2-1, Verified ORF, "Ribosomal 60S subunit protein L17B; homologous to mammalian ribosomal protein L17 and bacterial L22; RPL17B has a paralog, RPL17A, that arose from the whole genome duplication"	-	-	-	-	-	-	-	-	-	-	-	12	-	1
	PEX19	PEX19 SGDID:S000002223, Chr IV from 337277-336249, Genome Release 64-2-1, reverse complement, Verified ORF, "Chaperone and import receptor for newly-synthesized class I PMPs; binds peroxisomal membrane proteins (PMPs) in the cytoplasm and delivers them to the peroxisome for subsequent insertion into the peroxisomal membrane; interacts with Myo2p and contributes to peroxisome partitioning"	-	-	-	-	-	-	-	-	-	-	-	8	-	1
	DUS3	DUS3 SGDID:S000004393, Chr XII from 924448-922442, Genome Release 64-2-1, reverse complement, Verified ORF, "Dihydrouridine synthase; member of a widespread family of conserved proteins including Smm1p, Dus1p, and Dus4p; contains a consensus oleate response element (ORE) in its promoter region; forms nuclear foci upon DNA replication stress"	-	-	-	-	-	-	-	-	-	-	-	9	-	1
	GIS2	GIS2 SGDID:S000005199, Chr XIV from 167790-167329, Genome Release 64-2-1, reverse complement, Verified ORF, "Translational activator for mRNAs with internal ribosome entry sites; associates with polysomes and binds to a specific subset of mRNAs; localizes to RNA processing bodies (P bodies) and to stress granules; may have a role in translation regulation under stress conditions; ortholog of huma…	-	-	-	-	-	-	-	-	-	-	-	7	-	1
	MSC3	MSC3 SGDID:S000004209, Chr XII from 574151-576337, Genome Release 64-2-1, Verified ORF, "Protein of unknown function; green fluorescent protein (GFP)-fusion protein localizes to the cell periphery; msc3 mutants are defective in directing meiotic recombination events to homologous chromatids; potential Cdc28p substrate; protein abundance increases in response to DNA replication stress"	-	-	-	-	-	-	-	-	-	-	-	7	-	1
	SHE2	SHE2 SGDID:S000001613, Chr XI from 196028-195288, Genome Release 64-2-1, reverse complement, Verified ORF, "RNA-binding protein that binds specific mRNAs and interacts with She3p; part of the mRNA localization machinery that restricts accumulation of certain proteins to the bud; binds to ER-derived membranes and targets mRNAs to cortical ER"	-	-	-	-	-	-	-	-	-	-	-	8	-	1
	NUP82	NUP82 SGDID:S000003597, Chr X from 320016-322157, Genome Release 64-2-1, Verified ORF, "Linker nucleoporin component of the nuclear pore complex (NPC); also part of the NPC cytoplasmic filaments; contributes to nucleocytoplasmic transport and NPC biogenesis; forms stable associations with three FG-nucleoporins (Nsp1p, Nup159p, and Nup116p); relocalizes to the cytosol in response to hypoxia"	-	-	-	-	-	-	-	-	-	-	-	9	-	1
	ELP4	ELP4 SGDID:S000006022, Chr XVI from 360209-361579, Genome Release 64-2-1, Verified ORF, "Subunit of hexameric RecA-like ATPase Elp456 Elongator subcomplex; which is required for modification of wobble nucleosides in tRNA; required for Elongator structural integrity"	-	-	-	-	-	-	-	-	-	-	-	9	-	1
	SHS1	SHS1 SGDID:S000002384, Chr IV from 52445-54100, Genome Release 64-2-1, Verified ORF, "Component of the septin ring that is required for cytokinesis; septins are GTP-binding proteins that assemble into rod-like hetero-oligomers that can associate with other rods to form filaments; septin rings at the mother-bud neck act as scaffolds for recruiting cell division factors and as barriers to prevent d…	-	-	-	-	-	-	-	-	-	-	-	10	-	1
	TOM40	TOM40 SGDID:S000004816, Chr XIII from 668492-669655, Genome Release 64-2-1, Verified ORF, "Component of the TOM (translocase of outer membrane) complex; responsible for recognition and initial import steps for all mitochondrially directed proteins; constitutes the core element of the protein conducting pore; pre-Tom40p is phosphorylated by PKA, which impairs its import into mitochondria under non…	-	-	-	-	-	-	-	-	-	-	-	9	-	1
	ELP3	ELP3 SGDID:S000006007, Chr XVI from 386446-384773, Genome Release 64-2-1, reverse complement, Verified ORF, "Subunit of Elongator complex; Elongator is required for modification of wobble nucleosides in tRNA; exhibits histone acetyltransferase activity that is directed to histones H3 and H4; disruption confers resistance to K. lactis zymotoxin"	-	-	-	-	-	-	-	-	-	-	-	11	-	1
	RSC58	RSC58 SGDID:S000004023, Chr XII from 208761-210269, Genome Release 64-2-1, Verified ORF, "Component of the RSC chromatin remodeling complex; RSC functions in transcriptional regulation and elongation, chromosome stability, and establishing sister chromatid cohesion; involved in telomere maintenance"	-	-	-	-	-	-	-	-	-	-	-	8	-	1
	URE2	URE2 SGDID:S000005173, Chr XIV from 220201-219137, Genome Release 64-2-1, reverse complement, Verified ORF, "Nitrogen catabolite repression transcriptional regulator; inhibits GLN3 transcription in good nitrogen source; role in sequestering Gln3p and Gat1p to the cytoplasm; has glutathione peroxidase activity and can mutate to acquire GST activity; altered form creates [URE3] prion"	-	-	-	-	-	-	-	-	-	-	-	9	-	1
	TSR4	TSR4 SGDID:S000005382, Chr XV from 281498-280272, Genome Release 64-2-1, reverse complement, Verified ORF, "Cytoplasmic protein required for correct processing of 20S pre-rRNA; protein required for processing of the 20S pre-rRNA at site D to generate mature 18S rRNA; essential gene in S288C background but not in CEN.PK2"	-	-	-	-	-	-	-	-	-	-	-	8	-	1
	ADR1	ADR1 SGDID:S000002624, Chr IV from 895035-899006, Genome Release 64-2-1, Verified ORF, "Carbon source-responsive zinc-finger transcription factor; required for transcription of the glucose-repressed gene ADH2, of peroxisomal protein genes, and of genes required for ethanol, glycerol, and fatty acid utilization"	-	-	-	-	-	-	-	-	-	-	-	9	-	1
	SWI3	SWI3 SGDID:S000003712, Chr X from 94530-92053, Genome Release 64-2-1, reverse complement, Verified ORF, "Subunit of the SWI/SNF chromatin remodeling complex; SWI/SNF regulates transcription by remodeling chromosomes; contains SANT domain that is required for SWI/SNF assembly; is essential for displacement of histone H2A-H2B dimers during ATP-dependent remodeling; required for transcription of man…	-	-	-	-	-	-	-	-	-	-	-	7	-	1
	RTT106	RTT106 SGDID:S000005150, Chr XIV from 258155-256788, Genome Release 64-2-1, reverse complement, Verified ORF, "Histone chaperone; involved in regulation of chromatin structure in both transcribed and silenced chromosomal regions; affects transcriptional elongation; has a role in regulation of Ty1 transposition; interacts physically and functionally with Chromatin Assembly Factor-1 (CAF-1)"	-	-	-	-	-	-	-	-	-	-	-	7	-	1
	GPP2	GPP2 SGDID:S000000864, Chr V from 280682-279930, Genome Release 64-2-1, reverse complement, Verified ORF, "DL-glycerol-3-phosphate phosphatase involved in glycerol biosynthesis; also known as glycerol-1-phosphatase; induced in response to hyperosmotic or oxidative stress, and during diauxic shift; GPP2 has a paralog, GPP1, that arose from the whole genome duplication"	-	-	-	-	-	-	-	-	-	-	-	7	-	1
	GDH2	GDH2 SGD:S000002374	-	-	-	-	-	-	-	-	-	-	-	7	-	1
	MDM20	MDM20 SGDID:S000005436, Chr XV from 187024-189414, Genome Release 64-2-1, Verified ORF, "Non-catalytic subunit of the NatB N-terminal acetyltransferase; NatB catalyzes N-acetylation of proteins with specific N-terminal sequences; involved in mitochondrial inheritance and actin assembly"	-	-	-	-	-	-	-	-	-	-	-	7	-	1
	MEX67	MEX67 SGDID:S000006090, Chr XVI from 230838-229039, Genome Release 64-2-1, reverse complement, Verified ORF, "Poly(A)RNA binding protein involved in nuclear mRNA export; component of the nuclear pore; ortholog of human TAP"	-	-	-	-	-	-	-	-	-	-	-	8	-	1
	TMA64	TMA64 SGDID:S000002524, Chr IV from 685643-683946, Genome Release 64-2-1, reverse complement, Verified ORF, "Protein of unknown function that associates with ribosomes; has a putative RNA binding domain; in mammals the corresponding protein, eIF2D, has been shown to possess translation initiation factor activity"	-	-	-	-	-	-	-	-	-	-	-	7	-	1
	IST2	IST2 SGDID:S000000290, Chr II from 423041-420201, Genome Release 64-2-1, reverse complement, Verified ORF, "Cortical ER protein involved in ER-plasma membrane tethering; one of 6 proteins (Ist2p, Scs2p, Scs22p, Tcb1p, Tcb2p, Tcb3p) that connect ER to the plasma membrane (PM) and regulate PM phosphatidylinositol-4-phosphate (PI4P) levels by controlling access of Sac1p phosphatase to its substrate …	-	-	-	-	-	-	-	-	-	-	-	6	-	1
	RPP2B	RPP2B SGDID:S000002790, Chr IV from 1239492-1239824, Genome Release 64-2-1, Verified ORF, "Ribosomal protein P2 beta; a component of the ribosomal stalk, which is involved in the interaction between translational elongation factors and the ribosome; free (non-ribosomal) P2 stimulates the phosphorylation of the eIF2 alpha subunit (Sui2p) by Gcn2p; regulates the accumulation of P1 (Rpp1Ap and Rpp1B…	-	-	-	-	-	-	-	-	-	-	-	6	-	1
	MLP2	MLP2 SGDID:S000001411, Chr IX from 68067-63028, Genome Release 64-2-1, reverse complement, Verified ORF, "Myosin-like protein associated with the nuclear envelope; nuclear basket protein that connects the nuclear pore complex with the nuclear interior; involved in the Tel1p pathway that controls telomere length; MLP2 has a paralog, MLP1, that arose from the whole genome duplication"	-	-	-	-	-	-	-	-	-	-	-	9	-	1
	CRP1	CRP1 SGDID:S000001189, Chr VIII from 390300-391697, Genome Release 64-2-1, Verified ORF, "Protein that binds to cruciform DNA structures; CRP1 has a paralog, MDG1, that arose from the whole genome duplication"	-	-	-	-	-	-	-	-	-	-	-	8	-	1
	ROD1	ROD1 SGDID:S000005544, Chr XV from 364369-366882, Genome Release 64-2-1, Verified ORF, "Alpha-arrestin involved in ubiquitin-dependent endocytosis; activating dephosphorylation relays glucose signaling to transporter endocytosis; calcineurin dephosphorylation is required for Rsp5p-dependent internalization of agonist-occupied Ste2p, as part of signal desensitization; recruits Rsp5p to Ste2p via i…	-	-	-	-	-	-	-	-	-	-	-	8	-	1
	ECM32	ECM32 SGDID:S000000978, Chr V from 541690-545055, Genome Release 64-2-1, Verified ORF, "DNA dependent ATPase/DNA helicase; helicase belonging to the Dna2p- and Nam7p-like family of helicases that is involved in modulating translation termination; interacts with the translation termination factors, localized to polysomes"	-	-	-	-	-	-	-	-	-	-	-	8	-	1
	LEO1	LEO1 SGDID:S000005649, Chr XV from 554570-553176, Genome Release 64-2-1, reverse complement, Verified ORF, "Component of the Paf1 complex; which associates with RNA polymerase II and is involved in histone methylation; plays a role in regulating Ty1 transposition; involved in transcription elongation as demonstrated by the G-less-based run-on (GLRO) assay"	-	-	-	-	-	-	-	-	-	-	-	6	-	1
	RKM2	RKM2 SGDID:S000002606, Chr IV from 853972-852533, Genome Release 64-2-1, reverse complement, Verified ORF, "Ribosomal protein lysine methyltransferase; responsible for trimethylation of the lysine residue at position 3 of Rpl12Ap and Rpl12Bp"	-	-	-	-	-	-	-	-	-	-	-	6	-	1
	RIB3	RIB3 SGDID:S000002895, Chr IV from 1428980-1428354, Genome Release 64-2-1, reverse complement, Verified ORF, "3,4-dihydroxy-2-butanone-4-phosphate synthase (DHBP synthase); required for riboflavin biosynthesis from ribulose-5-phosphate, also has an unrelated function in mitochondrial respiration"	-	-	-	-	-	-	-	-	-	-	-	7	-	1
	SNX4	SNX4 SGDID:S000003573, Chr X from 378825-380096, Genome Release 64-2-1, Verified ORF, "Sorting nexin; involved in retrieval of late-Golgi SNAREs from post-Golgi endosomes to the trans-Golgi network and in cytoplasm to vacuole transport; contains a PX phosphoinositide-binding domain; forms complexes with Snx41p and with Atg20p"	-	-	-	-	-	-	-	-	-	-	-	6	-	1
	RPL21A	RPL21A SGDID:S000000395, Chr II from 606270-606280,606669-607140, Genome Release 64-2-1, Verified ORF, "Ribosomal 60S subunit protein L21A; homologous to mammalian ribosomal protein L21, no bacterial homolog; RPL21A has a paralog, RPL21B, that arose from the whole genome duplication"	-	-	-	-	-	-	-	-	-	-	-	6	-	1
	NGR1	NGR1 SGDID:S000000416, Chr II from 647886-649904, Genome Release 64-2-1, Verified ORF, "RNA binding protein that negatively regulates growth rate; interacts with the 3' UTR of the mitochondrial porin (POR1) mRNA and enhances its degradation; overexpression impairs mitochondrial function; interacts with Dhh1p to mediate POR1 mRNA decay; expressed in stationary phase"	-	-	-	-	-	-	-	-	-	-	-	6	-	1
	UTP10	UTP10 SGDID:S000003645, Chr X from 217309-212000, Genome Release 64-2-1, reverse complement, Verified ORF, "Nucleolar protein; component of the small subunit (SSU) processome containing the U3 snoRNA that is involved in processing of pre-18S rRNA; mutant has increased aneuploidy tolerance"	-	-	-	-	-	-	-	-	-	-	-	-	29	1
	MYO5	MYO5 SGDID:S000004715, Chr XIII from 486587-490246, Genome Release 64-2-1, Verified ORF, "One of two type I myosin motors; contains proline-rich tail homology 2 (TH2) and SH3 domains; MYO5 deletion has little effect on growth, but myo3 myo5 double deletion causes severe defects in growth and actin cytoskeleton organization; MYO5 has a paralog, MYO3, that arose from the whole genome duplication"	-	-	-	-	-	-	-	-	-	-	-	-	25	1
	KRE33	KRE33 SGDID:S000005076, Chr XIV from 375321-378491, Genome Release 64-2-1, Verified ORF, "Protein required for biogenesis of the small ribosomal subunit; heterozygous mutant shows haploinsufficiency in K1 killer toxin resistance; essential gene; NAT10, the human homolog, implicated in several types of cancer and premature aging."	-	-	-	-	-	-	-	-	-	-	-	-	20	1
	RPN2	RPN2 SGDID:S000001337, Chr IX from 220700-217863, Genome Release 64-2-1, reverse complement, Verified ORF, "Subunit of the 26S proteasome; substrate of the N-acetyltransferase Nat1p; protein abundance increases in response to DNA replication stress"	-	-	-	-	-	-	-	-	-	-	-	-	19	1
	ACO2	ACO2 SGDID:S000003736, Chr X from 58813-56444, Genome Release 64-2-1, reverse complement, Verified ORF, "Putative mitochondrial aconitase isozyme; similarity to Aco1p, an aconitase required for the TCA cycle; expression induced during growth on glucose, by amino acid starvation via Gcn4p, and repressed on ethanol"	-	-	-	-	-	-	-	-	-	-	-	-	16	1
	CHO2	CHO2 SGDID:S000003389, Chr VII from 802440-805049, Genome Release 64-2-1, Verified ORF, "Phosphatidylethanolamine methyltransferase (PEMT); catalyzes the first step in the conversion of phosphatidylethanolamine to phosphatidylcholine during the methylation pathway of phosphatidylcholine biosynthesis"	-	-	-	-	-	-	-	-	-	-	-	-	19	1
	CSE1	CSE1 SGDID:S000003207, Chr VII from 49552-52434, Genome Release 64-2-1, Verified ORF, "Nuclear envelope protein that mediates the nuclear export of Srp1p; Srp1p (importin alpha) is a homolog of metazoan CAS protein; required for accurate chromosome segregation"	-	-	-	-	-	-	-	-	-	-	-	-	13	1
	SPT16	SPT16 SGDID:S000003175, Chr VII from 98969-102076, Genome Release 64-2-1, Verified ORF, "Subunit of the heterodimeric FACT complex (Spt16p-Pob3p); FACT associates with chromatin via interaction with Nhp6Ap and Nhp6Bp, and reorganizes nucleosomes to facilitate access to DNA by RNA and DNA polymerases; SPT16 specifically required for diauxic shift-induced H2B deposition onto rDNA genes; some mutati…	-	-	-	-	-	-	-	-	-	-	-	-	21	1
	APL4	APL4 SGDID:S000006233, Chr XVI from 626967-624469, Genome Release 64-2-1, reverse complement, Verified ORF, "Gamma-adaptin; large subunit of the clathrin-associated protein (AP-1) complex; binds clathrin; involved in vesicle mediated transport"	-	-	-	-	-	-	-	-	-	-	-	-	14	1
	GEA2	GEA2 SGDID:S000000748, Chr V from 111421-115800, Genome Release 64-2-1, Verified ORF, "Guanine nucleotide exchange factor for ADP ribosylation factors (ARFs); involved in vesicular transport between the Golgi and ER, Golgi organization, and actin cytoskeleton organization; GEA2 has a paralog, GEA1, that arose from the whole genome duplication"	-	-	-	-	-	-	-	-	-	-	-	-	16	1
	NOG1	NOG1 SGDID:S000006014, Chr XVI from 370978-372921, Genome Release 64-2-1, Verified ORF, "Putative GTPase; associates with free 60S ribosomal subunits in the nucleolus and is required for 60S ribosomal subunit biogenesis; constituent of 66S pre-ribosomal particles; member of the ODN family of nucleolar G-proteins"	-	-	-	-	-	-	-	-	-	-	-	-	18	1
	UBP6	UBP6 SGDID:S000001906, Chr VI from 165067-166566, Genome Release 64-2-1, Verified ORF, "Ubiquitin-specific protease; situated in the base subcomplex of the 26S proteasome, releases free ubiquitin from branched polyubiquitin chains; negatively regulates degradation of ubiquitinated proteins by the proteasome; works in opposition to Hul5p polyubiquitin elongation activity; mutant has aneuploidy tol…	-	-	-	-	-	-	-	-	-	-	-	-	16	1
	POX1	POX1 SGD:S000003173	-	-	-	-	-	-	-	-	-	-	-	-	15	1
	DEF1	DEF1 SGDID:S000001537, Chr XI from 338753-336537, Genome Release 64-2-1, reverse complement, Verified ORF, "RNAPII degradation factor; forms a complex with Rad26p in chromatin, enables ubiquitination and proteolysis of RNAPII present in an elongation complex; mutant is deficient in Zip1p loading onto chromosomes during meiosis"	-	-	-	-	-	-	-	-	-	-	-	-	14	1
	NOP9	NOP9 SGDID:S000003547, Chr X from 419562-417562, Genome Release 64-2-1, reverse complement, Verified ORF, "Essential subunit of U3-containing 90S preribosome; involved in production of 18S rRNA and assembly of small ribosomal subunit; also part of pre-40S ribosome and required for its export into cytoplasm; binds RNA and contains pumilio domain"	-	-	-	-	-	-	-	-	-	-	-	-	15	1
	TCB1	TCB1 SGDID:S000005612, Chr XV from 486779-483219, Genome Release 64-2-1, reverse complement, Verified ORF, "Lipid-binding ER protein involved in ER-plasma membrane tethering; one of 6 proteins (Ist2p, Scs2p, Scs22p, Tcb1p, Tcb2p, Tcb3p) that connect ER to plasma membrane and regulate PI4P levels by controlling access of Sac1p phosphatase to its substrate PI4P in PM; contains 3 calcium and lipid b…	-	-	-	-	-	-	-	-	-	-	-	-	14	1
	MAK21	MAK21 SGDID:S000002467, Chr IV from 570649-573726, Genome Release 64-2-1, Verified ORF, "Constituent of 66S pre-ribosomal particles; required for large (60S) ribosomal subunit biogenesis; acts as part of a Mak21p-Noc2p-Rrp5p module that associates with nascent pre-rRNA during transcription and has a role in bigenesis of the large ribosomal subunit; involved in nuclear export of pre-ribosomes; req…	-	-	-	-	-	-	-	-	-	-	-	-	13	1
	UTP22	UTP22 SGDID:S000003322, Chr VII from 662358-666071, Genome Release 64-2-1, Verified ORF, "Component of the small-subunit processome; required for nuclear export of tRNAs; may facilitate binding of Utp8p to aminoacylated tRNAs and their delivery to Los1p for export; conserved from yeast to mammals"	-	-	-	-	-	-	-	-	-	-	-	-	14	1
	ISW1	ISW1 SGDID:S000000449, Chr II from 711539-708150, Genome Release 64-2-1, reverse complement, Verified ORF, "ATPase subunit of imitation-switch (ISWI) class chromatin remodelers; with Ioc3p forms Isw1a complex involved in repression of transcription initiation; with Ioc2p and Ioc4p forms Isw1b complex involved in regulation of transcription elongation; Isw1b recruited to ORFs by H3K36 methylation …	-	-	-	-	-	-	-	-	-	-	-	-	15	1
	CEX1	CEX1 SGDID:S000005638, Chr XV from 531508-533793, Genome Release 64-2-1, Verified ORF, "Component of nuclear aminoacylation-dependent tRNA export pathway; cytoplasmic; interacts with nuclear pore component Nup116p; copurifies with tRNA export receptors Los1p and Msn5p, as well as eIF-1a; required for activation of RAN GTPase Gsp1p and dissociation of receptor-tRNA-Gsp1p export complex; recruits R…	-	-	-	-	-	-	-	-	-	-	-	-	14	1
	VID27	VID27 SGDID:S000005156, Chr XIV from 247461-249809, Genome Release 64-2-1, Verified ORF, "Cytoplasmic protein of unknown function; possibly involved in vacuolar protein degradation; not essential for proteasome-dependent degradation of fructose-1,6-bisphosphatase (FBPase); null mutants exhibit normal growth"	-	-	-	-	-	-	-	-	-	-	-	-	12	1
	GEA1	GEA1 SGDID:S000003792, Chr X from 490812-486586, Genome Release 64-2-1, reverse complement, Verified ORF, "Guanine nucleotide exchange factor for ADP ribosylation factors (ARFs); involved in vesicular transport between the Golgi and ER, Golgi organization, and actin cytoskeleton organization; GEA1 has a paralog, GEA2, that arose from the whole genome duplication"	-	-	-	-	-	-	-	-	-	-	-	-	11	1
	EBP2	EBP2 SGDID:S000001655, Chr XI from 125759-127042, Genome Release 64-2-1, Verified ORF, "Required for 25S rRNA maturation and 60S ribosomal subunit assembly; localizes to the nucleolus and in foci along nuclear periphery; constituent of 66S pre-ribosomal particles; cooperates with Rrs1p and Mps3p to mediate telomere clustering by binding Sir4p, but is not involved in telomere tethering"	-	-	-	-	-	-	-	-	-	-	-	-	10	1
	RUD3	RUD3 SGDID:S000005742, Chr XV from 748979-747525, Genome Release 64-2-1, reverse complement, Verified ORF, "Golgi matrix protein; involved in the structural organization of the cis-Golgi; interacts genetically with COG3 and USO1"	-	-	-	-	-	-	-	-	-	-	-	-	8	1
	NUP2	NUP2 SGDID:S000004327, Chr XII from 797430-799592, Genome Release 64-2-1, Verified ORF, "Nucleoporin involved in nucleocytoplasmic transport; binds to either the nucleoplasmic or cytoplasmic faces of the nuclear pore complex depending on Ran-GTP levels; also has a role in chromatin organization"	-	-	-	-	-	-	-	-	-	-	-	-	11	1
	UTP20	UTP20 SGDID:S000000100, Chr II from 227636-235117, Genome Release 64-2-1, Verified ORF, "Component of the small-subunit (SSU) processome; SSU processome is involved in the biogenesis of the 18S rRNA"	-	-	-	-	-	-	-	-	-	-	-	-	14	1
	DBP9	DBP9 SGDID:S000004266, Chr XII from 696830-695046, Genome Release 64-2-1, reverse complement, Verified ORF, "DEAD-box protein required for 27S rRNA processing; exhibits DNA, RNA and DNA/RNA helicase activities; ATPase activity shows preference for DNA over RNA; DNA helicase activity abolished by mutation in RNA-binding domain"	-	-	-	-	-	-	-	-	-	-	-	-	10	1
	TAE2	TAE2 SGDID:S000005930, Chr XVI from 538936-535820, Genome Release 64-2-1, reverse complement, Verified ORF, "Component of the ribosome quality control complex (RQC); RQC (Rqc1p-Rkr1p-Tae2p-Cdc48p-Npl4p-Ufd1p) is a ribosome-bound complex required for the degradation of polypeptides arising from stalled translation involved in protein translation; monitors translation stress and signals this to Hsf…	-	-	-	-	-	-	-	-	-	-	-	-	9	1
	UTP21	UTP21 SGDID:S000004401, Chr XII from 937233-934414, Genome Release 64-2-1, reverse complement, Verified ORF, "Subunit of U3-containing 90S preribosome and SSU processome complexes; involved in production of 18S rRNA and assembly of small ribosomal subunit; synthetic defect with STI1 Hsp90 cochaperone; human homolog linked to glaucoma; Small Subunit processome is also known as SSU processome"	-	-	-	-	-	-	-	-	-	-	-	-	10	1
	NOB1	NOB1 SGDID:S000005582, Chr XV from 431626-430247, Genome Release 64-2-1, reverse complement, Verified ORF, "Protein involved in proteasomal and 40S ribosomal subunit biogenesis; required for cleavage of the 20S pre-rRNA to generate the mature 18S rRNA; cleavage is activated by Fun12p, a GTPase and translation initiation factor; relocalizes from nucleus to nucleolus upon DNA replication stress"	-	-	-	-	-	-	-	-	-	-	-	-	12	1
	RSC6	RSC6 SGDID:S000000648, Chr III from 214994-216445, Genome Release 64-2-1, Verified ORF, "Component of the RSC chromatin remodeling complex; essential for mitotic growth; RSC6 has a paralog, SNF12, that arose from the whole genome duplication"	-	-	-	-	-	-	-	-	-	-	-	-	8	1
	SHE10	SHE10 SGDID:S000003197, Chr VII from 67598-69331, Genome Release 64-2-1, Verified ORF, "Protein involved in outer spore wall assembly; likely involved directly in dityrosine layer assembly; putative GPI-anchored protein; overexpression causes growth arrest; SHE10 has a paralog, OSW7/YFR039C, that arose from the whole genome duplication and deletion of both SHE10 and OWS7 results in reduced dityro…	-	-	-	-	-	-	-	-	-	-	-	-	11	1
	HIS5	HIS5 SGDID:S000001378, Chr IX from 142928-144085, Genome Release 64-2-1, Verified ORF, "Histidinol-phosphate aminotransferase; catalyzes the seventh step in histidine biosynthesis; responsive to general control of amino acid biosynthesis; mutations cause histidine auxotrophy and sensitivity to Cu, Co, and Ni salts"	-	-	-	-	-	-	-	-	-	-	-	-	10	1
	MRN1	MRN1 SGDID:S000006105, Chr XVI from 197788-195950, Genome Release 64-2-1, reverse complement, Verified ORF, "RNA-binding protein that may be involved in translational regulation; binds specific categories of mRNAs, including those that contain upstream open reading frames (uORFs) and internal ribosome entry sites (IRES); interacts genetically with chromatin remodelers and splicing factors, linkin…	-	-	-	-	-	-	-	-	-	-	-	-	7	1
	YGR250C	YGR250C SGDID:S000003482, Chr VII from 993521-991176, Genome Release 64-2-1, reverse complement, Verified ORF, "Putative RNA binding protein; localizes to stress granules induced by glucose deprivation; interacts with Rbg1p in a two-hybrid assay; protein abundance increases in response to DNA replication stress"	-	-	-	-	-	-	-	-	-	-	-	-	8	1
	PEP4	PEP4 SGDID:S000006075, Chr XVI from 260931-259714, Genome Release 64-2-1, reverse complement, Verified ORF, "Vacuolar aspartyl protease (proteinase A); required for posttranslational precursor maturation of vacuolar proteinases; important for protein turnover after oxidative damage; plays a protective role in acetic acid induced apoptosis; synthesized as a zymogen, self-activates"	-	-	-	-	-	-	-	-	-	-	-	-	9	1
	URB2	URB2 SGDID:S000003802, Chr X from 513763-510239, Genome Release 64-2-1, reverse complement, Verified ORF, "Protein required for normal metabolism of the rRNA primary transcript; nucleolar protein; proposed to be involved in ribosome biogenesis"	-	-	-	-	-	-	-	-	-	-	-	-	11	1
	NIC96	NIC96 SGDID:S000001898, Chr VI from 150016-152535, Genome Release 64-2-1, Verified ORF, "Linker nucleoporin component of the nuclear pore complex (NPC); also part of the NPC nuclear basket; contributes to nucleocytoplasmic transport and NPC biogenesis; forms stable associations with three FG-nucleoporins (Nsp1p, Nup57p, and Nup49p)"	-	-	-	-	-	-	-	-	-	-	-	-	11	1
	UBA2	UBA2 SGDID:S000002798, Chr IV from 1256847-1254937, Genome Release 64-2-1, reverse complement, Verified ORF, "Subunit of heterodimeric nuclear SUMO activating enzyme E1 with Aos1p; activates Smt3p (SUMO) before its conjugation to proteins (sumoylation), which may play a role in protein targeting; essential for viability; "	-	-	-	-	-	-	-	-	-	-	-	-	8	1
	VPS74	VPS74 SGDID:S000002780, Chr IV from 1222149-1221112, Genome Release 64-2-1, reverse complement, Verified ORF, "Golgi phosphatidylinositol-4-kinase effector and PtdIns4P sensor; interacts with the cytosolic domains of cis and medial glycosyltransferases, and in the PtdIns4P-bound state mediates the targeting of these enzymes to the Golgi; interacts with the catalytic domain of Sac1p, the major cel…	-	-	-	-	-	-	-	-	-	-	-	-	9	1
	CDC11	CDC11 SGDID:S000003837, Chr X from 576601-575354, Genome Release 64-2-1, reverse complement, Verified ORF, "Component of the septin ring that is required for cytokinesis; septins are GTP-binding proteins that assemble into rod-like hetero-oligomers that can associate with other rods to form filaments; septin rings at the mother-bud neck act as scaffolds for recruiting cell division factors and as…	-	-	-	-	-	-	-	-	-	-	-	-	9	1
	RIO1	RIO1 SGDID:S000005645, Chr XV from 550246-548792, Genome Release 64-2-1, reverse complement, Verified ORF, "Serine kinase involved in cell cycling and pre-rRNA processing; associated with late pre-40S particles via its conserved C-terminal domain and participates in late 40S biogenesis; association with pre-40S particles regulated by its catalytic ATPase site and likely occurs after the release o…	-	-	-	-	-	-	-	-	-	-	-	-	9	1
	UBP1	UBP1 SGDID:S000002280, Chr IV from 242552-244981, Genome Release 64-2-1, Verified ORF, "Ubiquitin-specific protease; removes ubiquitin from ubiquitinated proteins; cleaves at the C terminus of ubiquitin fusions irrespective of their size; capable of cleaving polyubiquitin chains"	-	-	-	-	-	-	-	-	-	-	-	-	8	1
	NUP120	NUP120 SGDID:S000001540, Chr XI from 333969-330856, Genome Release 64-2-1, reverse complement, Verified ORF, "Subunit of the Nup84p subcomplex of the nuclear pore complex (NPC); contributes to nucleocytoplasmic transport and NPC biogenesis and is involved in establishment of a normal nucleocytoplasmic concentration gradient of the GTPase Gsp1p; also plays roles in several processes that may requi…	-	-	-	-	-	-	-	-	-	-	-	-	9	1
	PWP2	PWP2 SGDID:S000000653, Chr III from 223228-220457, Genome Release 64-2-1, reverse complement, Verified ORF, "Conserved 90S pre-ribosomal component; essential for proper endonucleolytic cleavage of the 35 S rRNA precursor at A0, A1, and A2 sites; contains eight WD-repeats; PWP2 deletion leads to defects in cell cycle and bud morphogenesis"	-	-	-	-	-	-	-	-	-	-	-	-	8	1
	SPB1	SPB1 SGDID:S000000559, Chr III from 31449-33974, Genome Release 64-2-1, Verified ORF, "AdoMet-dependent methyltransferase; involved in rRNA processing and 60S ribosomal subunit maturation; methylates G2922 in the tRNA docking site of the large subunit rRNA and in the absence of snR52, U2921; suppressor of PAB1 mutants"	-	-	-	-	-	-	-	-	-	-	-	-	7	1
	SEC61	SEC61 SGDID:S000004370, Chr XII from 877178-875736, Genome Release 64-2-1, reverse complement, Verified ORF, "Conserved ER protein translocation channel; essential subunit of Sec61 complex (Sec61p, Sbh1p, and Sss1p); forms channel for SRP-dependent protein import; with Sec63 complex allows SRP-independent protein import into ER; involved in posttranslational soluble protein import into the ER, ER…	-	-	-	-	-	-	-	-	-	-	-	-	8	1
	TAE1	TAE1 SGDID:S000000465, Chr II from 735530-734832, Genome Release 64-2-1, reverse complement, Verified ORF, "AdoMet-dependent proline methyltransferase; catalyzes the dimethylation of ribosomal proteins Rpl12 and Rps25 at N-terminal proline residues; has a role in protein synthesis; fusion protein localizes to the cytoplasm"	-	-	-	-	-	-	-	-	-	-	-	-	7	1
	SFH5	SFH5 SGDID:S000003681, Chr X from 145160-146044, Genome Release 64-2-1, Verified ORF, "Non-classical phosphatidylinositol transfer protein (PITP); exhibits PI- but not PC-transfer activity; localizes to the peripheral endoplasmic reticulum, cytosol and microsomes; similar to Sec14p; partially relocalizes to the plasma membrane upon DNA replication stress"	-	-	-	-	-	-	-	-	-	-	-	-	9	1
	RPC82	RPC82 SGDID:S000006394, Chr XVI from 919041-917077, Genome Release 64-2-1, reverse complement, Verified ORF, "RNA polymerase III subunit C82"	-	-	-	-	-	-	-	-	-	-	-	-	6	1
	ECM10	ECM10 SGD:S000000756	-	-	-	-	-	-	-	-	-	-	-	-	10	1
	SST2	SST2 SGDID:S000004444, Chr XII from 1041366-1039270, Genome Release 64-2-1, reverse complement, Verified ORF, "GTPase-activating protein for Gpa1p; regulates desensitization to alpha factor pheromone; also required to prevent receptor-independent signaling of the mating pathway; member of the RGS (regulator of G-protein signaling) family"	-	-	-	-	-	-	-	-	-	-	-	-	8	1
	UBP10	UBP10 SGDID:S000005130, Chr XIV from 289498-291876, Genome Release 64-2-1, Verified ORF, "Ubiquitin-specific protease, deubiquitinates Ub-protein moieties; interacts with proteins that function in rRNA production and ribosome biogenesis; stabilizes Rpa190p, the largest subunit of RNAP I, by mediating its deubiquitination; controls PCNA deubiquitylation; may regulate silencing by acting on Sir4p; …	-	-	-	-	-	-	-	-	-	-	-	-	7	1
	MCM5	MCM5 SGDID:S000004264, Chr XII from 691555-693882, Genome Release 64-2-1, Verified ORF, "Component of the Mcm2-7 hexameric helicase complex; MCM complex is important for priming origins of DNA replication in G1 and becomes an active ATP-dependent helicase that promotes DNA melting and elongation when activated by Cdc7p-Dbf4p in S-phase"	-	-	-	-	-	-	-	-	-	-	-	-	10	1
	QNS1	QNS1 SGDID:S000001116, Chr VIII from 246193-248337, Genome Release 64-2-1, Verified ORF, "Glutamine-dependent NAD(+) synthetase; essential for the formation of NAD(+) from nicotinic acid adenine dinucleotide"	-	-	-	-	-	-	-	-	-	-	-	-	6	1
	NPL4	NPL4 SGDID:S000000374, Chr II from 578086-576344, Genome Release 64-2-1, reverse complement, Verified ORF, "Substrate-recruiting cofactor of the Cdc48p-Npl4p-Ufd1p segregase; assists Cdc48p in the dislocation of misfolded, polyubiquitinated ERAD substrates that are subsequently delivered to the proteasome for degradation; also involved in the regulated destruction of resident ER membrane proteins…	-	-	-	-	-	-	-	-	-	-	-	-	6	1
	WHI4	WHI4 SGDID:S000002383, Chr IV from 56346-54397, Genome Release 64-2-1, reverse complement, Verified ORF, "Putative RNA binding protein; regulates the cell size requirement for passage through Start and commitment to cell division; WHI4 has a paralog, WHI3, that arose from the whole genome duplication"	-	-	-	-	-	-	-	-	-	-	-	-	6	1
	SHE3	SHE3 SGDID:S000000334, Chr II from 496869-495592, Genome Release 64-2-1, reverse complement, Verified ORF, "Protein adaptor between Myo4p and the She2p-mRNA complex; part of the mRNA localization machinery that restricts accumulation of certain proteins to the bud; also required for cortical ER inheritance"	-	-	-	-	-	-	-	-	-	-	-	-	6	1
	CCC1	CCC1 SGDID:S000004210, Chr XII from 576825-577793, Genome Release 64-2-1, Verified ORF, "Vacuolar Fe2+/Mn2+ transporter; suppresses respiratory deficit of yfh1 mutants, which lack the ortholog of mammalian frataxin, by preventing mitochondrial iron accumulation; relative distribution to the vacuole decreases upon DNA replication stress"	-	-	-	-	-	-	-	-	-	-	-	-	6	1
	AMD1	AMD1 SGDID:S000004498, Chr XIII from 208860-206428, Genome Release 64-2-1, reverse complement, Verified ORF, "AMP deaminase; tetrameric enzyme that catalyzes the deamination of AMP to form IMP and ammonia; thought to be involved in regulation of intracellular purine (adenine, guanine, and inosine) nucleotide pools"	-	-	-	-	-	-	-	-	-	-	-	-	6	1
	GDE1	GDE1 SGDID:S000006031, Chr XVI from 344739-341068, Genome Release 64-2-1, reverse complement, Verified ORF, "Glycerophosphocholine (GroPCho) phosphodiesterase; hydrolyzes GroPCho to choline and glycerolphosphate, for use as a phosphate source and as a precursor for phosphocholine synthesis; may interact with ribosomes"	-	-	-	-	-	-	-	-	-	-	-	-	6	1
	FAR8	FAR8 SGDID:S000004631, Chr XIII from 330231-328660, Genome Release 64-2-1, reverse complement, Verified ORF, "Protein involved in recovery from arrest in response to pheromone; acts in a cell cycle arrest recovery pathway independent from Far1p; interacts with Far3p, Far7p, Far9p, Far10p, and Far11p"	-	-	-	-	-	-	-	-	-	-	-	-	8	1
	DIP2	DIP2 SGDID:S000004119, Chr XII from 399657-402488, Genome Release 64-2-1, Verified ORF, "Nucleolar protein; specifically associated with the U3 snoRNA, part of the large ribonucleoprotein complex known as the small subunit (SSU) processome, required for 18S rRNA biogenesis, part of the active pre-rRNA processing complex"	-	-	-	-	-	-	-	-	-	-	-	-	7	1
	GSY2	GSY2 SGDID:S000004248, Chr XII from 660716-662833, Genome Release 64-2-1, Verified ORF, "Glycogen synthase; expression induced by glucose limitation, nitrogen starvation, heat shock, and stationary phase; activity regulated by cAMP-dependent, Snf1p and Pho85p kinases as well as by the Gac1p-Glc7p phosphatase; GSY2 has a paralog, GSY1, that arose from the whole genome duplication; relocalizes from…	-	-	-	-	-	-	-	-	-	-	-	-	7	1
	RSA4	RSA4 SGDID:S000000668, Chr III from 242352-240805, Genome Release 64-2-1, reverse complement, Verified ORF, "WD-repeat protein involved in ribosome biogenesis; may interact with ribosomes; required for maturation and efficient intra-nuclear transport or pre-60S ribosomal subunits, localizes to the nucleolus"	-	-	-	-	-	-	-	-	-	-	-	-	6	1
	APM1	APM1 SGDID:S000006180, Chr XVI from 52671-51244, Genome Release 64-2-1, reverse complement, Verified ORF, "Mu1-like medium subunit of the AP-1 complex; binds clathrin; involved in clathrin-dependent Golgi protein sorting; the AP-1 complex is the clathrin-associated protein complex"	-	-	-	-	-	-	-	-	-	-	-	-	6	1
	GUT2	GUT2 SGDID:S000001417, Chr IX from 53708-51759, Genome Release 64-2-1, reverse complement, Verified ORF, "Mitochondrial glycerol-3-phosphate dehydrogenase; expression is repressed by both glucose and cAMP and derepressed by non-fermentable carbon sources in a Snf1p, Rsf1p, Hap2/3/4/5 complex dependent manner"	-	-	-	-	-	-	-	-	-	-	-	-	7	1
	FDC1	FDC1 SGDID:S000002947, Chr IV from 1512094-1513605, Genome Release 64-2-1, Verified ORF, "Putative phenylacrylic acid decarboxylase; essential for the decarboxylation of aromatic carboxylic acids to the corresponding vinyl derivatives; homolog of E. coli UbiD; GFP-fusion protein localizes to the cytoplasm"	-	-	-	-	-	-	-	-	-	-	-	-	8	1

## Sheet: filterpass
	Kog1-N (20 min)	PSM_IP	PSM_mock	Kog1-heat (20 min)	PSM_IP	PSM_mock	Kog1-KCl (20 min)	PSM_IP	PSM_mock	Kog1-H2O2 (20 min)	PSM_IP	PSM_mock	Pib2-Glu (0 min)	PSM_IP	PSM_mock	Pib2-Glu (2 hrs)	PSM_IP	PSM_mock	Kog1-Glu_A (0 min)	PSM_IP	PSM_mock	Kog1-Glu_A (20 min)	PSM_IP	PSM_mock	Kog1-Glu_A (2 hrs)	PSM_IP	PSM_mock	Kog1-Glu_B (0 min)	PSM_IP	PSM_mock	Kog1-Glu_B (2 hrs)	PSM_IP	PSM_mock	Kog1-Glu_B (6 hrs)	PSM_IP	PSM_mock	Kog1-Glu_B (24 hrs)	PSM_IP	PSM_mock
	TOR1	576	52	TOR1	726	43	TOR1	579	41	TOR1	621	45	TOR1	285	50	TOR1	317	44	TOR1	450	35	TOR1	391	13	TOR1	393	10	TOR1	392	53	TOR1	400	75	TOR1	299	33	TOR1	256	26
	KOG1	395	19	KOG1	469	22	KOG1	451	19	KOG1	430	23	KOG1	167	22	KOG1	197	27	KOG1	323	32	KOG1	284	12	KOG1	288	14	KOG1	254	35	KOG1	297	57	KOG1	202	25	KOG1	237	20
	TOR2	180	10	TOR2	206	12	TOR2	186	7	TOR2	185	8	PIB2	159	3	PIB2	158	1	TCO89	161	8	TCO89	170	1	TCO89	148	1	YML039W	162	1	TCO89	118	21	TCO89	105	5	TCO89	104	5
	TCO89	127	3	TCO89	149	2	TCO89	142	5	TCO89	171	10	TCO89	116	11	TCO89	105	14	TOR2	130	3	KSP1	92	6	TOR2	91	4	YML045W	155	1	MDN1	135	31	TOR2	71	10	TEF2	405	180
	YML039W	102	1	LST8	89	3	YML039W	97	1	KSP1	99	6	KSP1	58	8	PMA2	82	1	KSP1	100	9	TOR2	89	4	KSP1	85	3	MDN1	145	66	TOR2	151	15	KSP1	51	5	GFA1	64	27
	PMA2	96	1	RTG2	61	16	KSP1	94	9	LST8	93	9	TPD3	44	9	VTC2	75	33	VMA1	88	41	LST8	60	3	MDN1	78	34	YMR050C	150	1	CDC39	98	34	NUM1	49	22	PSE1	52	20
	RTG2	90	15	MKS1	48	1	LST8	77	5	TDH1	70	1	MDN1	39	12	YBT1	72	22	SSB2	72	1	RTG2	46	5	LST8	51	2	TCO89	131	7	TEF2	374	116	IKI3	44	16	RRP12	51	22
	KSP1	70	7	KSP1	47	6	RTG2	66	10	YBT1	70	20	SER33	37	4	YCF1	63	25	MDN1	47	18	PIB2	31	1	RTG2	48	6	TOR2	132	9	SEC7	81	37	BEM2	43	12	BEM2	48	12
	LST8	60	8	NTH1	37	9	IML1	56	2	YCL019W	58	1	LST8	36	12	KSP1	51	6	LST8	44	4	ENA2	30	1	DBP3	42	17	DED1	124	57	PSE1	73	31	DBP5	42	18	UTP10	41	12
	DOP1	49	20	TPS2	37	16	YMR045C	53	1	YCF1	56	25	SER3	31	1	VAC8	43	15	RTG2	44	2	SSA4	30	1	CBF5	42	17	YCL019W	79	1	TIF2	109	46	RTG2	35	2	XRN1	43	13
	IML1	47	5	EMI2	33	10	YCL019W	52	1	RTG2	55	13	AAC3	30	1	MNN2	41	18	RRP12	37	16	MKS1	29	1	SUP35	39	10	SEC7	79	33	TDH3	178	62	LST8	40	10	MYO5	39	14
	MKS1	46	3	GPH1	33	14	SEA4	52	16	IKI3	53	23	NUP159	25	10	SER33	37	2	CCT4	33	13	YDR089W	26	10	MKS1	37	1	KSP1	68	6	KSP1	65	13	VTC4	36	15	SXM1	33	12
	SEA4	37	13	BPT1	32	13	MKS1	49	2	VAC8	51	20	RTS1	24	5	TPD3	34	4	PHO91	32	11	YCK3	25	3	ECM29	32	13	TDH3	161	68	TDH2	129	49	VTC2	27	7	TOR2	44	5
	YDR089W	35	9	ALD4	30	11	YDR089W	38	15	GSC2	48	1	YGR125W	24	8	BPT1	33	7	PHO8	31	12	RPL7B	25	1	VPS13	29	9	PSE1	65	29	RRP12	60	25	XRN1	36	14	KRE33	33	13
	YPK9	35	15	PHO91	30	11	NPR1	37	10	IML1	43	5	HXT6	24	1	SER3	32	1	MKS1	31	1	SYG1	23	7	TAO3	28	2	NUM1	63	18	CRM1	64	24	GCN20	26	10	RPN2	33	14
	SYG1	35	5	IML1	30	4	YGR125W	34	10	MKS1	41	1	YDL180W	23	3	LST8	31	12	YLR072W	31	8	NAM7	21	6	ENA2	27	1	TDH2	121	52	PMA2	68	1	YBT1	34	9	KSP1	30	3
	MON2	33	10	YGR125W	28	11	SYG1	34	10	SEA4	37	13	SEA4	23	7	PHO8	31	10	VPS13	30	10	YDL180W	20	2	USO1	26	9	BEM2	61	14	BEM2	59	15	MKS1	29	1	LYS2	32	13
	OSH3	31	12	SEA4	28	5	NPR2	30	3	YPK9	35	8	YPK9	22	5	EPS1	28	11	PIB2	29	1	AVT4	19	1	YPK9	26	10	FUN12	53	24	IML1	53	6	YCF1	30	9	ACO2	27	11
	YGR125W	31	12	YDR089W	26	9	MTC5	30	3	PHO91	34	13	CHS2	22	7	NEO1	27	10	SSA3	29	1	GLN3	19	1	ASK10	25	10	MAE1	49	18	NUP192	59	22	YCK3	23	2	VPS13	30	9
	RTG3	31	1	ALD3	25	1	PIB2	29	2	PIB2	33	2	TRA1	21	7	PMC1	26	4	IML1	28	1	ROK1	19	6	NUP170	25	9	IKI3	51	20	NUM1	55	19	APL5	29	7	DOP1	26	8
	LAA1	30	11	DCS1	25	8	MYO4	29	10	PHO8	32	13	APL5	21	8	YGR125W	25	4	USO1	28	9	YNL115C	19	6	FUN30	25	7	TCB3	51	23	SPT6	50	16	DCP2	27	11	LST8	25	5
	LOS1	29	12	PIB2	24	1	VPS15	26	4	NPR1	32	9	RPS9A	20	1	SSA4	25	1	YGR125W	27	7	SKY1	19	6	OSH3	25	7	VPS13	52	10	VPS13	52	6	RIA1	31	10	RKR1	23	5
	VPS15	28	1	YCK3	24	7	RTC1	25	1	SYG1	32	4	VNX1	20	5	DAP2	23	3	NUG1	27	10	HRR25	17	6	BOI2	23	7	RPB2	46	18	VMA5	46	19	SSD1	26	9	RIA1	28	8
	KAP104	28	8	ENA2	23	1	SAP185	25	5	YGR125W	31	5	GND1	20	5	AKR1	23	9	YDR089W	26	7	VAC7	16	1	MOT1	23	6	RTG2	42	6	RTG2	43	6	SEC24	26	10	MTR4	24	5
	STU2	27	11	YDL180W	22	3	UFD4	25	10	YCK3	31	5	MRD1	19	6	ADP1	20	5	GFA1	26	10	YTM1	16	5	BOI1	22	6	NUP170	41	18	LST8	47	13	PAN1	25	10	VTC4	25	9
	PEP5	26	9	GTR1	20	1	MNR2	24	6	YDR089W	31	7	NUP133	19	6	RTS1	19	6	NPR1	26	7	RMD1	15	4	LIA1	22	8	TRA1	47	14	KAP104	38	6	YLR419W	26	8	SSA4	29	1
	NPR3	26	3	YRO2	19	6	NPR3	23	3	BPT1	29	7	CDC60	19	5	CDC53	19	3	RPL8A	26	1	SEA4	15	3	YGR125W	21	7	VAC8	42	18	TPD3	36	14	PIM1	27	8	EMW1	26	8
	GTR1	26	1	TRZ1	18	6	VAC7	23	1	MTC5	28	2	PPH22	17	1	APE3	19	5	SAP185	26	7	YVC1	15	5	PKC1	20	5	LST8	51	7	YDR089W	36	2	SEA4	25	7	RTG2	25	6
	KAP122	25	8	GAD1	18	3	YVC1	22	7	GTR1	27	1	RTG2	16	3	YPK9	18	1	TRP5	25	9	APM3	15	5	SAP185	20	7	XRN1	48	14	GSC2	45	1	RNR1	25	9	UFD2	25	5
	VPS53	25	9	IMD2	18	1	GTR1	22	1	SKG6	26	6	SEC18	16	5	SKG6	18	4	VNX1	23	6	GLE2	14	4	NOP7	20	7	MYO4	39	11	YBT1	44	19	MYO4	28	11	CHO2	31	12
	KIN2	25	9	VAC7	17	1	RTG3	22	1	RTC1	25	1	IML1	16	4	YDR089W	18	6	KAP95	23	9	RMT2	14	4	VTH2	20	1	MKS1	38	2	ILS1	44	12	HGH1	27	10	CSE1	21	8
	VAC14	24	7	MTC5	16	1	SKY1	21	4	SAP185	24	7	RPS0A	15	1	PFF1	17	4	FUN30	23	8	SMF3	14	4	DLD3	20	7	VTC4	33	13	SEC16	41	9	NPR1	20	7	SPT16	25	4
	SAP185	23	8	HXT6	16	1	NAM7	21	8	NAM7	23	8	CDC53	15	4	FET5	17	5	UFD4	22	4	RPS9A	13	1	BUD3	20	6	OSH3	33	8	GCN20	36	11	SNF1	24	3	APL4	23	9
	AVT1	23	9	NPR3	16	3	BUD3	20	6	NPR2	23	1	TDH1	15	1	APE1	17	2	PBS2	21	6	VTH1	13	1	MCM2	20	6	USO1	36	10	ECM29	38	13	PUF4	20	3	GEA2	22	6
	YVC1	23	4	RTG3	16	1	VAM6	19	2	VPS15	22	1	VAC7	15	1	YDL180W	17	1	SEC1	21	8	MNR2	12	2	SDA1	20	7	ECM29	36	15	MYO4	37	9	MET18	23	5	PIM1	27	8
	MTC5	22	2	AIM17	16	5	KIN2	18	6	AVT4	22	3	LSB6	15	2	ENA2	16	1	YDR341C	20	6	RPL13B	12	1	NUP159	19	7	IML1	32	1	YCF1	40	13	NUP192	24	8	MET18	23	3
	SNF2	22	6	RMD1	16	4	YLR001C	18	1	ADP1	22	8	MEH1	14	2	YCK3	16	5	LAA1	19	7	IML1	12	1	SEA4	18	4	SLH1	31	7	YCK3	37	3	MCM3	26	9	NAM7	26	8
	SKG6	22	7	GLN3	16	1	YDL180W	18	1	SKY1	21	7	MNR2	14	4	CHS3	15	3	TRA1	18	3	NHP2	12	3	MSB1	18	2	TAO3	31	3	XRN1	37	11	OSH2	22	6	NOG1	30	12
	VAC7	21	1	SSE2	15	1	LSB6	17	6	FRK1	20	2	RPL13B	13	1	LCB4	15	5	HOG1	18	6	HOM6	12	3	PBS2	18	5	VTC2	30	8	PHO91	31	7	VPS13	25	6	UBP6	22	6
	VAM6	21	1	VPS34	15	4	ATG13	17	5	YVC1	20	2	VPS34	13	4	VNX1	15	1	YDL180W	17	4	SER33	11	1	NUP188	18	4	SMC3	29	12	NMD5	39	11	BOI1	23	5	POX1	23	8
	NPR2	21	6	RMD8	14	4	AVT4	17	5	RTG3	20	2	YPR148C	13	4	MCR1	14	3	VAC7	17	2	IMD2	11	1	STE20	17	4	PHO91	30	4	RPB2	41	17	PBP1	19	7	MSN5	23	1
	BNI1	21	7	AVT4	14	2	RMD1	16	3	PEP5	20	6	GGA2	13	4	MAM3	14	2	YVC1	17	1	GPA2	11	3	VNX1	17	6	NMD5	29	12	KAP122	31	8	ECM29	24	8	NUP192	22	8
	CYR1	21	8	YVC1	14	3	FRK1	16	3	MNR2	19	1	YVC1	13	2	PMT1	14	4	CYR1	17	5	UGP1	11	3	TPA1	16	5	BOI2	33	2	UFD4	39	4	BOI2	24	7	DUR1,2	23	6
	RTC1	20	1	ALD2	13	3	RIF1	15	5	SEH1	19	6	RMD8	13	2	MNL2	14	4	AVT4	17	2	BEM1	11	2	IML1	16	1	YCK3	26	4	TRA1	40	10	SMC3	19	6	NOC2	23	4
	BUD3	19	3	GLC3	12	1	GLN3	15	2	YDL180W	19	2	RPL17A	13	1	NUP159	14	4	FET5	17	5	RPL26B	9	1	UTP13	16	5	LAA1	28	7	USO1	35	9	CTR9	21	7	ECM29	26	9
	RGD1	19	6	YLR001C	12	1	VPS30	14	4	VNX1	19	3	CFT2	12	3	LSB6	14	2	LYS20	17	1	VPS34	9	2	CYR1	16	5	UFD4	34	12	OSH2	33	4	SPA2	23	6	DEF1	20	6
	PKC1	18	4	ICY2	12	1	EFR3	13	4	RMD8	19	1	PPH21	12	1	AMS1	13	1	SYG1	17	4	RTC5	9	2	RNQ1	15	1	PIM1	30	11	VAC14	30	5	YDR089W	18	2	CTR9	20	3
	YDL180W	18	3	SSF1	12	1	MTR4	13	4	LSB6	19	1	SAP185	11	3	SYG1	13	1	KEL1	16	1	HSP42	9	2	PIB2	15	1	YLR419W	31	6	SPA2	32	13	PHO91	22	5	TRM3	25	5
	FAB1	17	1	VNX1	12	2	MHP1	13	4	MEH1	18	2	MKS1	11	1	MNR2	12	3	ENT5	16	5	FUS3	9	1	IMD4	15	1	VIP1	31	12	SEC24	35	14	BRO1	29	9	VTC2	21	5
	SEC8	17	5	YMR196W	12	3	AVO1	13	1	NPR3	18	2	APE1	11	2	RPS0A	12	1	HSP78	16	5	NOC4	8	1	SSK2	14	1	HEF3	41	1	TEF4	60	21	LYS20	17	1	GIN4	21	8
	LSB6	17	1	MEH1	12	2	FAB1	12	1	VAM6	17	1	GTR1	11	1	RTG2	12	2	KAP114	16	5	ECL1	8	1	LOS1	14	4	RPP0	56	23	CTR9	31	6	PKC1	21	3	SPA2	19	5
	SKY1	17	5	NPR2	11	3	CDC55	11	3	YLR001C	17	1	RMD1	11	3	PRC1	12	3	AKL1	16	5	GTR1	7	1	VAC7	14	1	BOI1	30	5	SXM1	35	12	VAC14	19	2	NOP9	19	4
	VPS34	17	6	VHC1	11	1	GTR2	11	1	PMC1	16	1	NPR1	11	3	COT1	11	3	SKY1	15	3	YGL114W	7	1	YNL115C	14	3	MON2	29	12	NPR3	32	3	DUR1,2	22	3	UFD4	23	4
	RMD8	17	6	LSB6	11	2	YAK1	11	1	VAC7	16	1	SIN3	11	3	OSM1	11	2	GLN3	15	1	GTR2	7	1	RMD8	14	3	KAP104	27	7	MTR4	33	7	MNR2	17	1	OSH2	21	4
	PSK1	16	5	SKG6	10	2	UBX6	9	2	SIP1	16	2	SDA1	10	2	YVC1	11	1	SER33	15	1	ATG13	7	1	YDL180W	14	1	NAM7	27	9	YGR125W	35	4	EMW1	23	5	TCB1	20	6
	EPO1	16	1	CCC2	9	2	RBS1	8	1	RMD1	16	2	NUP60	10	2	YMR221C	11	2	RLI1	15	3	NUS1	7	1	YLR419W	14	4	MCM6	31	12	RIX7	29	8	YGR125W	20	3	SNF1	20	7
	RTT107	16	3	UGA1	9	2	ACE2	8	1	BUD3	16	4	AVT4	9	1	VHC1	11	1	SNF2	15	4	MKK1	7	1	RIP1	14	4	RPO21	28	8	MKS1	27	1	IMD2	20	1	NMD5	23	8
	GDI1	16	5	VTH2	8	1	RAD5	8	1	YNL115C	16	1	PEP3	9	2	RPL36A	10	1	NOC2	15	5	APM4	7	1	RPS9A	14	1	MET18	29	6	KAP114	30	8	CCR4	22	6	APL5	22	6
	VPS41	16	2	GTR2	8	1	ECL1	8	1	GLN3	16	1	GDT1	9	2	AVT3	10	2	ARP3	14	3	COS1	7	1	PGC1	13	4	YDR089W	26	1	VIP1	31	8	SCH9	20	4	CCR4	20	5
	PEP3	15	4	NCE103	7	1	SPT7	8	1	VPS34	15	2	NPR2	9	1	VAC7	10	1	ERG7	14	4	CNM67	7	1	NMD2	13	4	KAP122	25	4	MES1	31	13	LCB1	17	4	SEC18	27	11
	AVT4	15	3	YLR177W	7	1	SIT4	8	1	SPC42	15	3	VPS41	9	2	DNF3	10	1	TAO3	14	1	VPS30	7	1	FRK1	13	3	NUP159	27	9	GUA1	33	14	RPS0B	15	1	MAK21	18	5
	IMD2	14	1	SRB2	7	1	YLL007C	7	1	VCX1	14	2	ECM16	9	2	YJL171C	10	2	FAB1	13	2				MHP1	13	2	NCP1	27	9	LAA1	29	7	SSA3	24	1	SVL3	18	6
	SMY1	14	3	RTC1	7	1				HOM2	14	4	FAT1	9	2	VPS15	10	1	GDI1	13	2				SPC42	13	4	SEC3	25	9	ILV3	36	14	VTC3	18	2	KAP104	19	2
	RPS9B	13	1							PFF1	14	3	MTC5	9	1	PPH22	10	1	TPA1	13	3				PUF3	13	4	RPL7B	33	1	SYG1	30	6	BBC1	22	4	UTP22	20	6
	KAP120	13	2							VHC1	13	1	VPS13	9	1	YLR001C	10	2	SCY1	13	1				SEN1	13	3	YPK9	26	1	NUP145	32	8	SVL3	18	4	VIP1	20	5
	PTP3	13	2							GTR2	13	1	FRA1	9	1	AVT4	10	1	ADE16	13	3				SKY1	13	4	SEA4	26	7	NPR1	27	5	TIF4632	20	4	ISW1	20	5
	GTR2	13	1							ATG13	13	2	VTH2	8	1	RMD8	9	1	UTP7	13	3				ADE6	12	3	SSD1	24	7	PBS2	28	11	FRK1	18	3	CDC53	18	4
	LTE1	13	4							PEX8	13	2	HXT11	8	1	PHO90	9	2	LSB6	12	1				MOB1	12	3	PUF3	22	7	TKL1	33	10	LSG1	15	5	SHE4	15	3
	BMT6	13	3							VPS30	13	3	SKY1	8	1	PEP5	9	2	PUF6	12	2				STE5	11	3	AKL1	27	5	KEL1	28	10	PBY1	17	4	YLR419W	16	2
	YLR001C	12	2							MSB1	13	1	LYS20	8	1	PPH21	9	1	RPL21B	12	1				GCN3	11	2	DLD3	24	7	DNM1	29	12	UFD2	21	6	TIF4632	19	7
	CNM67	12	2							FET5	12	3	GTR2	8	1	MEH1	9	1	SEN1	12	1				MNR2	11	3	SAP185	27	6	PUF4	25	6	STU2	18	6	TPA1	19	6
	HAL5	12	3							CWP1	12	3	GUA1	7	1	SEY1	9	1	NAB6	12	3				RAX1	11	3	UFD2	25	8	RTC1	34	2	KAP114	19	6	CEX1	18	4
	PIB2	12	2							HSP42	12	2	RTC5	7	1	SVL3	8	1	SNF1	12	3				VPS34	11	1	MTR4	25	10	DHH1	29	10	SEC16	17	3	VID27	17	5
	VCX1	12	3							AVO1	12	2	RPT5	7	1	DCR2	8	1	NPR3	12	1				RLF2	11	3	HEM1	22	6	UFD2	27	7	PEP5	17	3	SEC1	17	4
	CDC25	12	3							TIM54	11	3	AVT3	7	1	VPS34	8	1	MTC5	11	1				RRS1	11	2	VPS53	22	6	VPS53	28	6	RPL17B	13	1	TRA1	21	3
	GLN3	12	1							FAB1	11	1	NPR3	7	1	SSF1	7	1	RIX1	11	3				RPL13B	11	1	SCH9	23	6	CYC8	28	5	ATF2	16	4	STE20	15	3
	TOF1	11	1							CNM67	11	1	JSN1	7	1	TGL3	7	1	PEX8	11	1				YRF1-3	11	3	BEM3	21	3	FUN30	33	4	SKI3	17	5	MTR10	17	2
	HER1	11	2							SLM4	10	2				MRL1	7	1	APL2	11	2				RMD1	11	2	BUD3	27	4	SNF1	28	8	ASK10	14	2	GEA1	16	5
	VPS16	11	1							APL3	10	2				ARO8	7	1	EXO84	11	2				IRA1	11	1	YDR161W	18	5	MET18	31	7	NMD2	19	1	FAA3	17	1
	VHC1	11	1							RPB3	10	2				MHP1	7	1	SRP72	11	3				ENT5	10	2	RKR1	24	7	SMC3	31	8	PHO8	15	4	EBP2	15	5
	SLS1	11	3							TGL4	9	2				LYP1	7	1	VPS15	11	1				MYO1	10	2	VAC14	20	1	AKL1	31	4	APL2	18	6	RPL11B	54	23
	BLM10	10	1							CTP1	9	1				FRE4	7	1	SKT5	11	2				ALG9	10	1	ERG27	25	6	GCD6	29	9	VPS53	17	2	PHO91	14	4
	CAF40	10	1							ECL1	9	1				GDI1	7	1	GTR1	10	1				YLR001C	10	1	RMD8	19	1	CSR1	24	7	IML1	19	2	RET1	16	2
	MSB1	9	1							AKR2	9	1							GCD2	10	2				IMD2	10	1	ERG11	23	9	GIN4	28	10	SCY1	14	3	YGR125W	18	2
	UBP15	9	1							YAK1	9	1							SEC6	10	2				RIF1	10	1	TDH1	62	1	CDC53	23	8	RGD2	16	3	RUD3	11	3
	AVO1	9	2							YRF1-3	9	1							MRS6	10	2				SER33	10	1	CLA4	21	8	YPK9	27	4	SAP185	15	3	LAA1	16	4
	FRK1	9	2							VPS41	9	2							YLR001C	10	1				HSL1	9	1	RAS2	19	7	PRS5	24	9	BEM3	17	4	KAP122	17	2
	BUD6	9	2							VAM3	9	1							KIN2	10	2				PRE6	9	1	RPT4	26	10	NUP85	24	8	NUP133	15	3	PMT1	15	5
	SPB4	9	2							COX15	9	2							FAT1	9	2				BEM1	9	2	MYO3	22	7	BCH1	22	6	BNI1	15	2	ASK10	15	1
	MKK2	8	1							YOL098C	9	1							VTH1	9	1				OPI3	9	2	GTR1	24	1	STU2	26	8	RNQ1	14	3	NUP2	16	5
	PSY2	8	1							SIT4	8	1							YPL260W	9	1				RPL26B	9	1	SKI3	25	8	NUP159	28	11	PAM1	16	4	UBP15	12	2
	CTF18	8	1							NYV1	8	1							BEM4	9	2				GLN3	9	1	KEL1	26	8	SAP185	26	5	TDH1	21	1	YCF1	16	4
	BPH1	8	1							CKB2	8	1							EMW1	9	2				AVT4	9	2	YCF1	25	4	SEC1	23	9	BPT1	12	1	SFB2	17	4
	RAD5	8	1							RPM2	8	1							IRA2	9	1				MDS3	9	2	TCB2	22	7	MTC5	30	8	BEM4	11	3	LCB4	16	4
	YLR422W	8	1							YNR065C	8	1							YPL245W	9	2				RPL21B	9	1	YGR125W	22	3	CCR4	24	6	COG6	13	4	SLH1	15	1
	GRR1	8	1							BRF1	8	1							SSE2	9	1				RPC34	8	1	BRO1	29	12	SKG6	26	5	YPK9	11	2	TRL1	16	5
	SEG2	7	1							MAG2	8	1							CKI1	9	1				VPS54	8	1	VPS15	20	1	HSP78	27	5	PAT1	18	4	SSD1	12	3
	GCN2	7	1							PPH21	8	1							MYO1	9	2				GTR1	8	1	SEC1	20	7	GCD1	24	6	MSB1	15	3	NUP188	15	2
	SKI2	7	1							MPS3	7	1							RTC5	8	1				UBR1	8	1	VAC7	20	1	MTR10	23	3	PEX19	10	2	OSH3	12	1
	YLL007C	7	1							TRS33	7	1							VPS30	8	1				NST1	8	1	MEU1	23	9	RRP6	21	8	DUS3	12	3	ATF2	15	3
	LST4	7	1							YLL007C	7	1							VPS34	8	1				MTC5	8	1	CYR1	24	2	SEC28	18	6	APM3	12	3	SCH9	14	4
	DBF20	7	1							LST4	7	1							VMA7	8	1				ADE16	7	1	PEP5	21	2	BEM3	25	8	LAA1	16	3	UTP20	20	6
	HUL5	7	1							YGL114W	7	1							PEP3	8	1				KSS1	7	1	FUN30	25	7	NAM7	29	8	KAP122	13	2	DBP9	13	3
	MAD2	7	1							ARF3	7	1							YPK2	8	1				YGL036W	7	1	LOS1	21	6	CLA4	22	7	YLL032C	12	2	KAP114	14	3
	UBR1	7	1							NCR1	7	1							GTR2	8	1				NPR3	7	1	SEC8	20	4	BNI1	29	4	BUD6	12	1	TPS2	13	4
	RTP1	7	1																UTP9	8	1				BUD6	7	1	SKG6	23	3	SEC8	24	5	SLH1	11	2	NUP170	14	4
	TSC11	7	1																VAM3	7	1				PDR15	7	1	ALO1	19	5	MON2	26	4	PSP1	14	2	UTP13	13	4
	ITC1	7	1																YPK3	7	1				CDC123	7	1	ZRC1	15	5	MCK1	22	8	SYG1	13	1	VAC14	13	3
																			SUI1	7	1				GTR2	7	1	KIN2	20	5	RIA1	28	4	GIS2	9	2	TAE2	13	4
																			POB3	7	1				HSP42	7	1	RPB3	14	4	GTR1	24	1	YPL260W	12	3	BOI1	14	1
																			ARF3	7	1							FRK1	19	1	TDH1	49	22	SHE4	13	2	UTP21	12	2
																			SBE22	7	1							EDC3	18	5	ADE6	21	7	RMD1	12	2	NOB1	17	5
																			SHE4	7	1							COG8	20	3	PAT1	25	3	GTR1	10	1	MKS1	11	1
																			APL1	7	1							SCY1	16	4	SCH9	24	5	AKL1	12	3	CDC24	10	1
																			DOT6	7	1							YBT1	21	5	NUP133	23	8	MSC3	9	2	RSC6	11	3
																			NPR2	7	1							MNR2	18	1	MAK5	23	9	VAC7	12	1	YVH1	15	5
																			FUS3	7	1							CDC24	17	6	RET1	25	9	SHE2	9	1	MYO3	13	2
																			DBF20	7	1							RMD1	17	2	PEP5	25	5	NUP82	11	2	RPL31B	11	1
																			MDS3	7	1							SNF2	19	4	ASK10	21	5	KIN4	11	3	BOI2	13	3
																			CNM67	7	1							MYO1	18	4	RPT4	26	10	MEH1	7	1	YKR018C	13	3
																			PTC3	7	1							SMC1	19	4	YLR001C	17	1	SMC1	11	1	MAK5	12	2
																			AVO1	7	1							ADE6	20	7	POL5	21	5	RTS1	11	3	YOL098C	10	2
																			RMD9	7	1							AFG2	18	5	YVC1	17	2	SEC5	11	2	RIX7	14	1
																			FRK1	7	1							NPR3	19	1	SLH1	22	3	RTG3	9	1	SHE10	14	3
																			ECL1	7	1							PIB2	14	1	TAO3	24	7	ELP4	11	2	VPS35	12	1
																			UTP25	7	1							YPR089W	17	5	KIN2	25	5	APM4	10	1	PEP5	13	3
																			NOP6	7	1							SMC2	18	2	EMW1	23	7	COG4	11	2	CYC8	12	3
																												IRA1	17	1	VPS15	23	1	KIN2	13	3	SEC3	13	3
																												PSK2	15	1	HOM3	17	4	APL1	11	1	YDR089W	12	1
																												POL1	21	7	LYS2	23	5	MAM3	9	1	HIS5	14	4
																												RTG3	16	1	RKR1	25	8	NUP145	11	3	MNR2	9	1
																												PPZ1	16	4	SKI3	24	6	SEC6	13	3	KEL3	12	2
																												BNI1	17	2	VPS34	19	3	SHS1	11	1	YBT1	15	5
																												ASK10	20	3	RIX1	19	6	TOM40	11	2	MRN1	9	2
																												TRM3	18	3	EFB1	20	6	NUP159	11	1	YGR250C	9	1
																												YVH1	17	5	PIM1	22	5	SEN1	13	2	PEP4	13	4
																												PKC1	18	3	SVF1	19	5	SBE22	9	2	SMY1	11	2
																												MTC5	17	1	SEH1	18	6	ELP3	13	2	YLL032C	9	2
																												HXT6	17	1	GCN3	16	4	MRS6	11	2	LOS1	11	3
																												SPC110	17	2	COG8	18	2	SLM1	10	2	HEL2	11	2
																												PAM1	16	3	GET4	16	5	RSC58	11	3	URB2	12	1
																												TRS120	16	2	YDL180W	15	1	URE2	11	2	NIC96	14	3
																												GPA1	17	6	PIB2	17	1	ATG13	9	1	BCH1	12	1
																												CFT1	17	3	LOS1	25	5	KEL3	9	2	UBR1	12	3
																												MSB1	19	1	SEC15	19	4	KCC4	9	2	SCY1	10	1
																												NUT1	18	5	STE20	18	5	TSR4	9	1	NMD2	11	1
																												YJR003C	14	3	SHE4	19	3	YJR003C	11	3	RGD2	11	2
																												SUM1	16	2	GDI1	18	3	ADR1	10	1	UBA2	10	2
																												VPS34	14	1	RTS1	19	3	YLR287C	8	1	PUF3	9	1
																												KIN1	16	3	VAC7	23	1	SUM1	9	2	VPS74	12	3
																												IFA38	16	3	FRK1	16	4	DBF2	11	2	SIN3	12	2
																												FAP7	15	5	PSK2	18	3	RMD8	9	1	APL1	10	1
																												RDH54	17	6	GCD2	16	3	SWI3	9	2	CDC11	11	2
																												SKY1	14	1	RGD2	17	5	SKY1	9	2	RIO1	10	1
																												VPS41	14	2	HOM6	17	6	RTT106	9	2	YDR161W	10	1
																												GTR2	16	2	SEN1	20	2	TRL1	11	2	YCK3	11	1
																												TAF14	15	5	CYR1	20	3	NUP60	8	1	UBP1	10	2
																												PHO8	16	1	RMT2	16	1	GTR2	11	1	TRM732	11	1
																												MET5	13	1	BUD3	21	5	PSK2	8	1	VPS41	8	1
																												SEN1	16	2	NOT3	26	8	SAP1	11	2	TRS120	8	1
																												FAB1	12	1	NPR2	17	5	MTC5	9	2	VPS53	11	2
																												TWF1	13	1	RPS0B	17	1	JSN1	10	1	IML1	9	1
																												DOT6	14	3	SNF2	17	4	GPP2	8	1	NUP120	11	2
																												JSN1	15	3	SIN4	19	5	GDH2	9	2	PWP2	9	1
																												VPS35	15	5	HGH1	17	5	VPS34	8	1	BUD3	11	2
																												UBP15	12	2	NOC3	18	6	UBP15	9	2	PSP1	10	1
																												APL6	15	4	FAB1	21	1	VNX1	9	1	RPS9B	17	1
																												YPL245W	13	4	YKR018C	19	1	COT1	7	1	SPB1	9	2
																												SYG1	14	1	NRD1	17	4	PMC1	10	1	SEC6	10	1
																												MEH1	10	1	KGD1	18	6	MDM20	8	1	RGR1	10	2
																												WHI3	12	3	RNR2	17	6	MEX67	9	1	BNI1	10	1
																												CDC9	13	4	SDS23	15	5	WHI3	11	3	SER33	8	1
																												FAA3	14	1	PUF3	18	5	TMA64	8	1	PKC1	10	1
																												STE5	13	2	VTC3	22	6	IST2	7	1	SEC61	11	3
																												YDL180W	15	1	STE5	16	3	YPR089W	10	1	DBF2	9	2
																												KIN4	12	2	APL2	18	6	MOB1	8	1	BEM3	10	2
																												SSK2	15	1	YRF1-3	16	3	SNF12	7	1	NUP85	7	1
																												CUL3	14	3	VPS35	19	4	RPP2B	7	1	SYH1	11	3
																												PSP1	10	2	DRS1	18	4	INP53	9	2	SIS2	7	1
																												RGR1	14	3	SYH1	15	3	PIK1	9	1	NTH1	10	2
																												TAH11	11	3	RMD8	15	1	AVT4	7	1	TAE1	9	2
																												VAM6	15	1	BOI1	17	3	MET5	8	1	UBP12	10	2
																												DUR1,2	16	3	SEC10	15	3	UBP12	10	2	NAB6	11	3
																												KCC4	13	3	EFR3	16	5	YVC1	9	1	SEC5	8	1
																												VBA4	12	1	TRM3	21	1	NTH1	9	2	COG8	9	1
																												POL3	13	4	YPL260W	17	4	RPS9A	13	1	NUP133	11	3
																												PBY1	13	2	APL6	18	5	HPM1	8	1	SEC10	9	1
																												YRF1-3	10	1	LSC1	16	5	MLP2	10	1	HPM1	8	1
																												RPC34	10	1	SEC5	15	5	CRP1	9	1	ECM21	7	1
																												LYS2	12	3	POL1	16	5	ROD1	9	1	TPS3	9	1
																												SDH1	11	2	SEC39	13	2	SWH1	7	1	SUA5	9	2
																												MRH4	13	1	AFG1	12	1	NPR3	9	1	SLM1	8	1
																												ARF3	11	3	PSP1	14	3	ECM32	9	1	POL5	8	1
																												RTC1	12	1	VPS41	15	2	LEO1	7	1	COG6	10	2
																												YSP2	13	1	SSK2	19	1	RKM2	7	1	PDR16	8	1
																												NTH1	11	2	TIF4632	17	6	SAP155	9	1	CYR1	9	1
																												GCG1	9	1	BOI2	18	5	MDS3	8	1	SFH5	10	1
																												EXO70	10	2	MDS3	18	3	PEP3	9	2	RPC82	7	1
																												YVC1	11	1	VNX1	17	3	SSK2	7	1	ECM10	11	1
																												ATG13	11	1	SKY1	13	3	RIB3	8	1	SST2	10	2
																												HFD1	9	2	DOT6	15	4	HAL5	8	1	CTR86	7	1
																												RCK2	14	3	SMC1	17	4	TRM3	8	1	SIN4	9	2
																												PDS5	12	2	RRB1	13	3	VAM6	10	1	UBP10	8	1
																												BPT1	10	1	JSN1	15	5	SNX4	7	1	MCM5	11	1
																												VPS30	11	1	AFG2	18	4	ARF3	7	1	AFG1	7	1
																												COT1	7	1	ECM16	18	6	IRA1	7	1	QNS1	7	1
																												KEL3	9	2	PSK1	15	1	PSK1	7	1	NPL4	7	1
																												YPT7	9	1	SEC6	17	5	MHP1	9	2	WHI4	7	1
																												SPC42	9	1	VAM6	17	1	TIP20	8	1	SHE3	7	1
																												NAB6	11	3	PDR16	13	4	VPS30	8	1	CCC1	7	1
																												POP2	12	3	TRM732	14	2	GYP5	8	1	PEP3	9	1
																												STU1	13	2	IRA1	18	1	VPS15	7	1	ENP2	7	1
																												YTA7	13	4	SMC2	15	4	RPL21A	7	1	DMA2	8	1
																												NUD1	9	1	APL1	14	2	NVJ2	7	1	EBS1	7	1
																												MHP1	12	1	FRA1	13	2	ELP2	7	1	AMD1	7	1
																												ODC2	11	2	ATG13	13	1	NGR1	7	1	GDE1	7	1
																												PRI1	10	2	PIK1	15	3	RTT107	7	1	FAR8	9	1
																												SAP1	10	1	CDC9	18	6	VHC1	7	1	DIP2	8	1
																												PHO81	11	3	MRS6	13	1	YNL115C	7	1	GSY2	8	1
																												YKL033W-A	9	2	IPI3	13	4	IMH1	7	1	SSF1	8	1
																												TUB4	9	1	PNO1	14	4	FSF1	7	1	SOG2	7	1
																												UBX4	11	3	YLR287C	11	1				SKY1	7	1
																												VTC3	9	1	SOG2	15	3				MHP1	8	1
																												SNF5	11	3	ETT1	13	3				RSA4	7	1
																												RPS9B	17	1	MNR2	16	2				APM1	7	1
																												LTV1	10	2	GTR2	14	4				HER1	8	1
																												RTT107	13	3	MSN5	14	3				YDL180W	7	1
																												SEC39	9	2	RTT107	15	1				GUT2	8	1
																												POL2	11	1	PKC1	15	3				SBE22	7	1
																												YNL284C-A	7	1	MEH1	10	2				FDC1	9	1
																												CKB2	9	2	RCK2	16	3
																												SED5	9	2	COG4	18	5
																												FRA1	8	1	RDH54	17	3
																												NPR2	9	2	DOM34	14	3
																												LSM1	11	2	PTK2	13	4
																												SOG2	10	1	PEP3	14	3
																												DUF1	9	1	RMD1	13	4
																												RPM2	9	2	SFB2	15	5
																												TTI1	10	1	NMD2	15	1
																												SRY1	8	1	UBX7	11	3
																												AFG1	9	2	ADE16	16	3
																												EBS1	11	2	IRR1	13	3
																												PMD1	10	1	TIP20	13	3
																												APM4	9	2	UBP15	11	2
																												PPZ2	8	1	TFC4	10	2
																												TRS130	11	2	RNA14	12	1
																												CDC25	11	3	KAP120	13	1
																												APL1	10	2	YDR161W	12	3
																												YLL032C	10	2	PRP6	11	1
																												MDS3	12	1	SAP155	15	1
																												ALK1	10	2	VID22	14	2
																												ERV41	8	1	BEM4	12	3
																												YLR072W	9	1	VPS5	11	2
																												YLR001C	7	1	COG3	12	1
																												ORC3	9	1	COG6	14	4
																												YGR012W	8	1	SGD1	14	4
																												ZRT1	7	1	CDC25	14	3
																												SLM4	9	1	RNT1	11	3
																												EPS1	10	2	YTA6	13	1
																												PAP1	9	2	TOF1	11	2
																												FSF1	9	1	POL12	12	1
																												NVJ2	9	2	TPS3	11	2
																												PSK1	8	1	RTG3	11	2
																												BUD7	8	1	SLT2	13	1
																												UBR1	10	1	PEA2	11	2
																												BRR2	9	2	VPS30	12	2
																												CHS3	8	1	ADE13	9	2
																												VMA7	7	1	VPS54	10	2
																												RCN2	8	1	RCY1	11	2
																												RMD9	9	1	SET3	10	2
																												TOM1	9	1	BMT6	10	1
																												MRPL8	7	1	AIM9	13	1
																												EMP70	7	1	RCN2	10	1
																												ALY2	8	1	RPL11B	35	13
																												HXT4	9	2	TOD6	11	1
																												PGC1	9	2	RPF2	12	1
																												SEY1	9	2	YLR072W	11	3
																												RGA2	7	1	APL3	14	2
																												HER1	9	1	SYO1	9	1
																												DMA1	7	1	SUA5	11	2
																												MSH1	8	1	WHI3	12	2
																												YSC84	8	1	MHP1	14	2
																												TCD1	7	1	GYP5	11	1
																												HST2	8	1	SEC9	10	1
																												PRS4	8	1	SIS2	7	1
																												LOA1	8	1	DSL1	10	1
																												YTA6	8	1	CKB2	8	1
																												SPC97	7	1	LHS1	11	1
																												ADE13	7	1	SNF12	8	1
																															ECM21	9	1
																															BRE1	8	1
																															EFM2	9	1
																															CUL3	11	2
																															VPS4	9	2
																															PUB1	9	2
																															SDS24	9	1
																															SKT5	11	3
																															IRA2	11	1
																															SCC2	11	2
																															HER1	10	1
																															RPL31B	13	1
																															KCC4	8	1
																															COG1	9	1
																															RRP4	9	2
																															CTR86	9	2
																															KIP3	9	1
																															DRE2	8	1
																															UBX4	11	2
																															RGA1	7	1
																															PPZ2	8	1
																															MET7	10	1
																															PMC1	9	2
																															INP53	10	1
																															NOT5	9	1
																															PDX1	8	1
																															COG5	7	1
																															RPS9B	14	1
																															GLN3	8	1
																															EXO70	8	1
																															BUD6	9	2
																															HEL2	8	1
																															ORC5	9	2
																															SWH1	11	2
																															CCA1	7	1
																															SLM4	7	1
																															UBP13	7	1
																															LAP3	7	1
																															SPC97	8	1
																															NUP1	9	1
																															UBX5	8	1
																															VPS16	11	1
																															DMA2	9	2
																															DUF1	9	1
																															PSY2	7	1
																															MLF3	7	1
																															BNI4	8	1
																															THR1	9	2
																															PUF2	7	1
																															CAF120	8	1
																															SLS1	8	1
																															BLM10	8	1
																															KIC1	8	1
																															RAD23	9	1
																															ATG11	7	1
																															STU1	11	1
																															GIP3	11	1
																															GLO3	11	3
																															REF2	7	1
																															SYF1	8	1
																															LEU9	7	1
																															NIP7	11	3
																															TUB4	7	1
																															SMC4	7	1
																															TTI1	8	1
																															RPO41	8	1
																															EAP1	9	1
																															SAK1	8	1
																															NMA1	7	1
																															ENV11	7	1
																															VPS8	8	1
																															NIF3	7	1
																															NDC80	12	1
																															MDY2	7	1
																															VPS33	7	1
																															POL2	7	1
																															PRP2	10	1
																															PEX1	8	1
																															ALG9	7	1
																															MED1	11	1
																															RIM15	8	1
																															BUL1	7	1
																															TPK3	7	1
																															ENP2	7	1
																															SMC5	7	1
																															MSS4	7	1
																															PRR1	9	2
																															FCP1	7	1
																															UBP12	8	1
																															TMA108	9	1
																															PDR1	7	1
																															TPS2	9	1
																															SKI2	9	2
																															BPH1	7	1
																															NYV1	7	1
																															VPS25	8	1
																															IMH1	7	1
																															PRO1	7	1
																															YLR419W	7	1
																															WTM1	7	1
																															YLR422W	7	1
																															YLL007C	7	1
																															MCD1	9	1
																															NMA111	7	1
																															GIR2	7	1
																															ALY2	9	1
																															PRE10	7	1
																															RAD5	7	1
																															SOK1	8	1
																															MSC6	7	1
																															PCL6	8	1
																															ELP2	8	1
																															RTT10	8	1
																															CWC22	7	1
																															THO2	8	1
																															SAP1	7	1
																															VPS3	8	1
																															PCF11	7	1
																															PRI2	7	1
