# Supplementary material for: Ait1 regulates TORC1 signaling and localization in budding yeast
Source: eLife. 2022 Sep 1;11:e68773. doi: 10.7554/eLife.68773 (PMC9499541; doi:10.7554/eLife.68773)
Supplement: Supplementary file 2. — Subspecies/variants were removed from the table for clarity. No other families of yeast have species with significant E values (p < 0.01). [file elife-68773-supp2.xlsx]

## Sheet: Sheet1
	Scientific Name	Max Score	Total Score	Query Cover	E value	Per. Ident	Acc. Len	Accession		Description
	Saccharomycetaceae
	Saccharomyces cerevisiae S288C	1046	1046	1	0	1	547	NP_010101.1		uncharacterized protein YDL180W [Saccharomyces cerevisiae S288C]
	Saccharomyces boulardii (nom. inval.)	1038	1038	1	0	0.989	547	KOH51318.1		hypothetical protein KO01_00648 [Saccharomyces boulardii (nom. inval.)]
	Saccharomyces paradoxus	949	949	1	0	0.8976	547	XP_033765096.1		uncharacterized protein SPAR_D00630 [Saccharomyces paradoxus]
	Saccharomyces kudriavzevii IFO 1802	835	835	1	0	0.7952	545	EJT43823.1		YDL180W-like protein [Saccharomyces kudriavzevii IFO 1802]
	Saccharomyces eubayanus	798	798	1	0	0.7586	549	XP_018222915.1		hypothetical protein DI49_0899 [Saccharomyces eubayanus]
	Zygotorulaspora mrakii	360	360	0.99	1e-117	0.4275	517	XP_037145999.1		uncharacterized protein HG535_0G01580 [Zygotorulaspora mrakii]
	Torulaspora delbrueckii	340	340	0.99	1e-110	0.4029	457	XP_003683223.1		hypothetical protein TDEL_0H01530 [Torulaspora delbrueckii]
	Kazachstania unispora	343	343	0.99	1e-110	0.3854	549	KAG0660055.1		hypothetical protein C6P44_003378 [Kazachstania unispora]
	[Candida] glabrata	342	342	0.99	1e-109	0.3765	575	KTB11239.1		putative membrane protein [[Candida] glabrata]
	Naumovozyma dairenensis CBS 421	337	337	1	2e-108	0.3986	521	XP_003667701.1		hypothetical protein NDAI_0A03010 [Naumovozyma dairenensis CBS 421]
	Vanderwaltozyma polyspora DSM 70294	331	331	0.99	8e-106	0.3846	557	XP_001644759.1		hypothetical protein Kpol_1020p7 [Vanderwaltozyma polyspora DSM 70294]
	Zygosaccharomyces rouxii	324	324	0.99	5e-104	0.3807	479	XP_002496051.1		uncharacterized protein ZYRO0C09328g [Zygosaccharomyces rouxii]
	Kazachstania barnettii	325	325	1	8e-103	0.3597	597	CAB4253991.1		similar to Saccharomyces cerevisiae YDL180W Putative protein of unknown function [Kazachstania barnettii]
	Naumovozyma castellii CBS 4309	322	322	1	1e-102	0.3544	527	XP_003676788.1		hypothetical protein NCAS_0E03610 [Naumovozyma castellii CBS 4309]
	Torulaspora globosa	320	320	0.99	5e-102	0.3772	507	XP_037139046.1		uncharacterized protein HG536_0C05400 [Torulaspora globosa]
	Torulaspora sp. CBS 2947	319	319	0.99	9e-102	0.3666	502	QLQ79892.1		hypothetical protein HG537_0C05400 [Torulaspora sp. CBS 2947]
	Kazachstania naganishii CBS 8797	315	315	1	8e-100	0.3905	537	XP_022462979.1		hypothetical protein KNAG_0B02910 [Kazachstania naganishii CBS 8797]
	Kazachstania africana CBS 2517	314	314	1	8e-100	0.3672	515	XP_003959865.1		hypothetical protein KAFR_0L01220 [Kazachstania africana CBS 2517]
	Kazachstania saulgeensis	315	315	1	4e-99	0.3468	597	SMN19908.1		similar to Saccharomyces cerevisiae YDL180W Putative protein of unknown function [Kazachstania saulgeensis]
	Zygosaccharomyces bailii	310	310	0.99	3e-98	0.3716	493	SJM85722.1		uncharacterized protein ZBIST_2428 [Zygosaccharomyces bailii]
	Zygosaccharomyces parabailii	309	309	0.99	4e-98	0.3716	493	AQZ10190.1		YDL180W [Zygosaccharomyces parabailii]
	Zygosaccharomyces mellis	303	303	0.99	2e-95	0.3693	503	GCE98814.1		hypothetical protein ZYGM_004332 [Zygosaccharomyces mellis]
	Lachancea fermentati	272	272	0.99	5e-84	0.3434	484	SCV99851.1		LAFE_0B03906g1_1 [Lachancea fermentati]
	Tetrapisispora phaffii CBS 4417	273	273	0.99	4e-83	0.3372	587	XP_003683835.1		hypothetical protein TPHA_0A03240 [Tetrapisispora phaffii CBS 4417]
	Lachancea quebecensis	255	255	0.99	9e-78	0.3151	464	CUS23315.1		LAQU0S09e02014g1_1 [Lachancea quebecensis]
	Kluyveromyces lactis	256	256	0.99	1e-77	0.3387	498	QEU59037.1		hypothetical protein KDRO_B03030 [Kluyveromyces lactis]
	Lachancea mirantina	252	252	0.99	2e-76	0.3488	483	SCU92575.1		LAMI_0E11100g1_1 [Lachancea mirantina]
	Lachancea thermotolerans CBS 6340	251	251	0.99	4e-76	0.3038	464	XP_002551692.1		KLTH0A05390p [Lachancea thermotolerans CBS 6340]
	Lachancea nothofagi CBS 11611	246	246	0.99	4e-74	0.3199	461	SCU82364.1		LANO_0B05952g1_1 [Lachancea nothofagi CBS 11611]
	Kluyveromyces marxianus	246	246	0.99	1e-73	0.3232	512	QGN17066.1		putative membrane protein YDL180W [Kluyveromyces marxianus]
	Lachancea meyersii CBS 8951	233	233	0.99	3e-69	0.3212	458	SCU96048.1		LAME_0F14642g1_1 [Lachancea meyersii CBS 8951]
	Lachancea sp. CBS 6924	223	223	0.99	1e-65	0.3169	458	SCU98587.1		LAFA_0G18954g1_1 [Lachancea sp. CBS 6924]
	Eremothecium sinecaudum	222	222	0.99	9e-65	0.3196	487	XP_017987093.1		HCL054Wp [Eremothecium sinecaudum]
	Lachancea lanzarotensis	221	221	0.99	1e-64	0.3187	458	XP_022628603.1		uncharacterized protein LALA0_S05e04280g [Lachancea lanzarotensis]
	Eremothecium cymbalariae DBVPG#7215	221	221	0.99	3e-64	0.3133	493	XP_003648153.1		Hypothetical protein Ecym_8040 [Eremothecium cymbalariae DBVPG#7215]
	Lachancea dasiensis	216	216	0.99	5e-63	0.3266	458	SCU91633.1		LADA_0F11122g1_1 [Lachancea dasiensis]
	Kazachstania exigua	198	198	0.74	4e-56	0.3198	458	KAG0664107.1		hypothetical protein C6P45_000687 [Kazachstania exigua]
	Kluyveromyces dobzhanskii CBS 2104	155	155	0.81	6e-41	0.2927	407	CDO95591.1		unnamed protein product [Kluyveromyces dobzhanskii CBS 2104]
	Tetrapisispora blattae CBS 6284	135	135	0.89	2e-32	0.2395	659	XP_004181263.1		hypothetical protein TBLA_0F02020 [Tetrapisispora blattae CBS 6284]
	Saccharomycetaceae sp. 'Ashbya aceri'	130	130	0.99	1e-31	0.2624	426	AGO13306.1		AaceriAFR161Cp [Saccharomycetaceae sp. 'Ashbya aceri']
	Eremothecium gossypii ATCC 10895	130	130	0.98	2e-31	0.2606	427	NP_985708.1		AFR161Cp [Eremothecium gossypii ATCC 10895]
	Saccharomycodaceae
	Saccharomycodes ludwigii	136	136	0.75	2e-34	0.2699	485	SSD60798.1		uncharacterized protein SCODWIG_02559 [Saccharomycodes ludwigii]
	Hanseniaspora osmophila	117	199	0.58	2e-27	0.3674	745	OEJ84017.1		putative membrane protein [Hanseniaspora osmophila]
	Hanseniaspora opuntiae	98.6	171	0.5	3e-21	0.3591	966	OEJ89777.1		putative membrane protein [Hanseniaspora opuntiae]
	Hanseniaspora uvarum	97.4	182	0.64	7e-21	0.3481	1001	KAF0271216.1		hypothetical protein FOG51_03717 [Hanseniaspora uvarum]
	Hanseniaspora guilliermondii	94	169	0.55	9e-20	0.3536	967	SGZ38624.1		uncharacterized protein HGUI_00824 [Hanseniaspora guilliermondii]
	Hanseniaspora valbyensis NRRL Y-1626	71.2	71.2	0.14	6e-13	0.4302	444	OBA19416.1		hypothetical protein HANVADRAFT_8587 [Hanseniaspora valbyensis NRRL Y-1626]
