# Supplementary material for: Ait1 regulates TORC1 signaling and localization in budding yeast
Source: eLife. 2022 Sep 1;11:e68773. doi: 10.7554/eLife.68773 (PMC9499541; doi:10.7554/eLife.68773)
Supplement: Supplementary file 3. [file elife-68773-supp3.xlsx]

## Sheet: Sheet1
Strain	Lab Strain	Genotype	Source
wt	ACY044	W303 MATa trp1-1 can1-100 leu2-3,112 his3-11,15 ura3 GAL+	Capaldi et al. 2008
pCore::pib2	ACY1669	[ACY044] pib2::pCore (URA3 Kan+) MATa	Sullivan et al. 2019
GFP-Pib2	ACY1715	[ACY1669] GFP-Pib2 MATa	Sullivan et al. 2019
Kog1-FLAG	ACY161	[ACY044] Kog1-6xGLY-3xFLAG (HIS3) MATa	Hughes Hallett et al. 2015
Kog1-HA	ACY363	[ACY044] Kog1-3xHA (TRP1) MATa	Hughes Hallett et al. 2015
pCore::ait1	ACY2638	[ACY044] ait1::pCore (URA3 Kan+) MATa	Sullivan et al. 2019
GFP-Ait1	ACY2643	[ACY2638] GFP-Ait1 MATa	This study
Kog1-YFP	ACY173	[ACY044] Kog1-ECitrine (HIS3) MATa	Hughes Hallett et al. 2015
Kog1-YFP ; ait1Δ	ACY2565	[ACY173] Kog1-ECitrine (HIS3) ; ait1::LEU2 MATa	This study
Kog1-YFP ; iml1Δ	ACY2149	[ACY173] Kog1-ECitrine (HIS3) ; iml1::LEU2 MATa	This study
Kog1-YFP ; seh1Δ	ACY2363	[ACY173] Kog1-ECitrine (HIS3) ; seh1::LEU2 MATa	This study
Kog1-YFP ; syg1Δ	ACY2170	[ACY173] Kog1-ECitrine (HIS3) ; syg1::LEU2 MATa	This study
Kog1-YFP ; vps30Δ	ACY2360	[ACY173] Kog1-ECitrine (HIS3) ; vps30::LEU2 MATa	This study
Kog1-YFP ; rtg2Δ	ACY2150	[ACY173] Kog1-ECitrine (HIS3) ; rtg2::LEU2 MATa	This study
Kog1-YFP ; vnx1Δ	ACY2253	[ACY173] Kog1-ECitrine (HIS3) ; vnx1::LEU2 MATa	This study
Kog1-YFP ; sea2Δ	ACY2447	[ACY173] Kog1-ECitrine (HIS3) ; sea2::LEU2 MATa	This study
Kog1-YFP ; npr3Δ	ACY2564	[ACY173] Kog1-ECitrine (HIS3) ; npr3::LEU2 MATa	This study
Kog1-YFP ; vsb1Δ	ACY2133	[ACY173] Kog1-ECitrine (HIS3) ; vsb1::LEU2 MATa	This study
Kog1-YFP ; sap185Δ	ACY1080	[ACY173] Kog1-ECitrine (HIS3) ; sap185::LEU2 MATa	Sullivan et al. 2019
Kog1-YFP ; rmd8Δ	ACY2169	[ACY173] Kog1-ECitrine (HIS3) ; rmd8::LEU2 MATa	This study
Kog1-YFP ; mhp1Δ	ACY2198	[ACY173] Kog1-ECitrine (HIS3) ; mhp1::LEU2 MATa	This study
Kog1-YFP ; vps13Δ	ACY2233	[ACY173] Kog1-ECitrine (HIS3) ; vps13::LEU2 MATa	This study
Kog1-YFP ; mnr2Δ	ACY2167	[ACY173] Kog1-ECitrine (HIS3) ; mnr2::LEU2 MATa	This study
Kog1-YFP ; pho91Δ	ACY2362	[ACY173] Kog1-ECitrine (HIS3) ; pho91::LEU2 MATa	This study
Kog1-YFP ; vtc5Δ	ACY2200	[ACY173] Kog1-ECitrine (HIS3) ; vtc5::LEU2 MATa	This study
Kog1-YFP ; avt4Δ	ACY2142	[ACY173] Kog1-ECitrine (HIS3) ; avt4::LEU2 MATa	This study
Kog1-YFP ; ypk9Δ	ACY2234	[ACY173] Kog1-ECitrine (HIS3) ; ypk9::LEU2 MATa	This study
Kog1-YFP ; vps15Δ	ACY1120	[ACY173] Kog1-ECitrine (HIS3) ; vps15::LEU2 MATa	Sullivan et al. 2019
Kog1-YFP ; sea4Δ	ACY2361	[ACY173] Kog1-ECitrine (HIS3) ; sea4::LEU2 MATa	This study
Kog1-YFP ; ylr001cΔ	ACY2160	[ACY173] Kog1-ECitrine (HIS3) ; ylr001c::LEU2 MATa	This study
Kog1-YFP ; mtc5Δ	ACY2158	[ACY173] Kog1-ECitrine (HIS3) ; mtc5::LEU2 MATa	This study
Kog1-YFP ; lsb6Δ	ACY2165	[ACY173] Kog1-ECitrine (HIS3) ; lsb6::LEU2 MATa	This study
Kog1-YFP ; laa1Δ	ACY2514	[ACY173] Kog1-ECitrine (HIS3) ; laa1::LEU2 MATa	This study
Kog1-YFP ; ksp1Δ	ACY1066	[ACY173] Kog1-ECitrine (HIS3) ; ksp1::LEU2 MATa	Sullivan et al. 2019
Kog1-YFP ; yvc1Δ	ACY2166	[ACY173] Kog1-ECitrine (HIS3) ; yvc1::LEU2 MATa	This study
Kog1-YFP ; sky1Δ	ACY1121	[ACY173] Kog1-ECitrine (HIS3) ; sky1::LEU2 MATa	Sullivan et al. 2019
Kog1-YFP ; frk1Δ	ACY1108	[ACY173] Kog1-ECitrine (HIS3) ; frk1::LEU2 MATa	Sullivan et al. 2019
Kog1-YFP ; vac7Δ	ACY1443	[ACY173] Kog1-ECitrine (HIS3) ; vac7::LEU2 MATa	Sullivan et al. 2019
Kog1-YFP ; yck3Δ	ACY1195	[ACY173] Kog1-ECitrine (HIS3) ; yck3::LEU2 MATa	Sullivan et al. 2019
Kog1-YFP ; rmd1Δ	ACY2206	[ACY173] Kog1-ECitrine (HIS3) ; rmd1::LEU2 MATa	This study
Kog1-YFP ; pep5Δ	ACY2511	[ACY173] Kog1-ECitrine (HIS3) ; mhp1::LEU2 MATa	This study
Kog1-YFP ; Prm1+2	ACY878	[ACY775] Kog1-ECitrine (HIS3) [Q513-525A] [Q846-855A] MATa	Hughes Hallett et al. 2015
Kog1-YFP ; npr2Δ	ACY1789	[ACY173] Kog1-ECitrine (HIS3) ; npr2::LEU2 MATa	This study
Kog1-YFP ; GTR1-on	ACY1786	[ACY173] Kog1-ECitrine (HIS3) ; Gtr1 [Q65L] MATa	Sullivan et al. 2019
Kog1-YFP ; pib2Δ	ACY1592	[ACY173] Kog1-ECitrine (HIS3) ; pib2::LEU2 MATa	Sullivan et al. 2019
Kog1-YFP ; gtr1Δ	ACY1295	[ACY173] Kog1-ECitrine (HIS3) ; gtr1::LEU2 MATa	Sullivan et al. 2019
Kog1-YFP ; gtr1Δ ; gtr2Δ	ACY1426	[ACY173] Kog1-ECitrine (HIS3) ; gtr1::LEU2 ; gtr2::URA3 MATa	This study
Kog1-YFP ; Prm1+2 ; ait1Δ	ACY2572	[ACY878] Kog1-ECitrine (HIS3) [Q513-525A] [Q846-855A] ; ait1::LEU2 MATa	This study
Kog1-YFP ; npr2Δ ; ait1Δ	ACY2602	[ACY1789] Kog1-ECitrine(HIS3) ; ait1::URA3 ; npr2::LEU2 MATa	This study
Kog1-YFP ; GTR1-on ; ait1Δ	ACY2574	[ACY1786] Gtr1 [Q65L] ; Kog1-ECitrine (HIS3) ; ait1::LEU2 MATa	This study
Kog1-YFP ; pib2Δ ; ait1Δ	ACY2632	[ACY2565] Kog1-ECitrine (HIS3) ; pib2::TRP1 ; ait1::LEU2 MATa	This study
Kog1-YFP ; gtr1Δ ; ait1Δ	ACY2609	[ACY1295] Kog1-ECitrine (HIS3) ; gtr1::LEU2 ; ait1::URA3 MATa	This study
Kog1-YFP ; gtr1Δ ; gtr2Δ ; ait1Δ	ACY2611	[ACY1426] Kog1-ECitrine (HIS3) ; gtr1::LEU2 ; gtr2::URA3 ; ait1::TRP1 MATa	This study
ait1Δ	ACY2654	[ACY044] ait1::TRP1 MATa	This study
Gtr1-on	ACY1757	[ACY044] Gtr1 [Q65L] MATa	This study
Gtr1-off	ACY1865	[ACY044] Gtr1 [S20L] MATa	This study
Gtr2-off	ACY1755	[ACY044] Gtr2 [Q66L] MATa	This study
Gtr1-off ; Gtr2-off	ACY2824	[ACY044] Gtr1 [S20L] ; Gtr2 [Q66L] MATa	This study
gtr1Δ	ACY2743	[ACY044] gtr1::URA3 MATa	This study
gtr2Δ	ACY2846	[ACY044] gtr2::Nat+ MATa	This study
gtr1Δ ; gtr2Δ	ACY2744	[ACY044] gtr1::URA3 ; gtr2::Nat+ MATa	This study
Prm1+2	ACY775	[ACY044] Kog1 [Q513-525A] [Q846-855A] MATa	Hughes Hallett et al. 2015
Gtr1-on ; ait1Δ	ACY2717	[ACY044] Gtr1 [Q65L] ; ait1::Kan+ MATa	This study
Gtr1-off ; ait1Δ	ACY2774	[ACY1865] Gtr1 [S20L] ; ait1::Kan+ MATa	This study
Gtr2-off ; ait1Δ	ACY2825	[ACY1755] Gtr2 [Q66L] ; ait1::TRP1 MATa	This study
Gtr1-off ; Gtr2-off ; ait1Δ	ACY2836	[ACY2824] Gtr1 [S20L] ; Gtr2 [Q66L] ; ait1::TRP1 MATa	This study
gtr1Δ ; ait1Δ	ACY2718	[ACY2654] gtr1::URA3 ; ait1::TRP1 MATa	This study
gtr2Δ ; ait1Δ	ACY2847	[ACY2654] gtr2::Nat+ ; ait1::TRP1 MATa	This study
gtr1Δ ; gtr2Δ ; ait1Δ	ACY2745	[ACY2654] ait1::TRP1 ; gtr1::URA3 ; gtr2::Nat+ MATa	This study
Prm1+2 ; ait1Δ	ACY2812	[ACY775] Kog1 [Q513-525A] [Q846-855A] ; ait1::TRP1 MATa	This study
ait1::pCore	ACY2821	[ACY044] ait1::pCore (URA3 Kan+) MATa	This study
Ait1ΔC4	ACY2823	[ACY2821] Ait1 [Y415-GGSGSGEGSGSGG-F524] MATa	This study
Ait1ΔC3	ACY2822	[ACY2821] Ait1 [F160-GGSGSGEGSGSGG-L341] MATa	This study
Ait1C3v1	ACY2928	[ACY2821] Ait1 [L213A] [C216A] [I217A] [E218A] [R220A] MATa	This study
Ait1C3v2	ACY2927	[ACY2821] Ait1 [I211A] [L213A] [C216A] [I217A] [E218A] [R220A] [I226A] MATa	This study
Ait1C3v3	ACY2985	[ACY2821] Ait1 [242-RSSSSTYGS-230] to [242-AAAAAAAAA-230] MATa	This study
Sch9-HA	ACY359	[ACY044] Sch9-3xHA (TRP1) MATa	Hughes Hallett et al. 2015
Sch9-HA ; ait1Δ	ACY2719	[ACY2654] Sch9-3xHA (Kan+) ; ait1::TRP1 MATa	This study
Gtr1-YFP	ACY1038	[ACY044] Gtr1-ECitrine (HIS3) MATa	Sullivan et al. 2019
Gtr1-YFP ; ait1Δ	ACY2735	[ACY2654] Gtr1-ECitrine (HIS3) ; ait1::TRP1 MATa	This study
GFP-Pib2 ; ait1Δ	ACY2656	[ACY1715] GFP-Pib2 ; ait1::TRP1 MATa	This study
ait1ΔC3::pCore	ACY2848	[ACY2822] ait1ΔC3::pCore (URA3 Kan+) MATa	This study
ait1ΔC4::pCore	ACY2849	[ACY2823] ait1ΔC4::pCore (URA3 Kan+) MATa	This study
GFP-Ait1ΔC3	ACY2853	[ACY2848] GFP-Ait1ΔC3 MATa	This study
GFP-Ait1ΔC4	ACY2854	[ACY2849] GFP-Ait1ΔC4 MATa	This study
GFP-Ait1C3v1	ACY2932	[ACY2848] GFP-Ait1 [L213A] [C216A] [I217A] [E218A] [R220A] MATa	This study
GFP-Ait1C3v2	ACY2930	[ACY2848] GFP-Ait1 [I211A] [L213A] [C216A] [I217A] [E218A] [R220A] [I226A] MATa	This study
GFP-Ait1C3v3	ACY3166	[ACY2848] Ait1 [242-RSSSSTYGS-230] to [242-AAAAAAAAA-230] MATa	This study
GFP-Ait1; Kog1-FLAG	ACY3218	[ACY2638] GFP-Ait1; Kog1-6xGLY-3xFLAG (HIS3) MATa	This study
Kog1-YFP ; ait1ΔC3	ACY2850	[ACY2822] Kog1-ECitrine (HIS3) ; Ait1 [F160-GGSGSGEGSGSGG-L341] MATa	This study
Kog1-YFP ; ait1ΔC4	ACY2839	[ACY2822] Kog1-ECitrine (HIS3) ; Ait1 [Y415-GGSGSGEGSGSGG-F524] MATa	This study
Kog1-YFP ; ait1C3v1	ACY2960	[ACY2822] Kog1-ECitrine (HIS3) ; Ait1 [L213A] [C216A] [I217A] [E218A] [R220A] MATa	This study
Kog1-YFP ; ait1C3v2	ACY2942	[ACY2822] Kog1-ECitrine (HIS3) ; Ait1 [I211A] [L213A] [C216A] [I217A] [E218A] [R220A] [I226A] MATa	This study
Kog1-YFP ; ait1C3v3	ACY3062	[ACY2822] Kog1-ECitrine (HIS3) ; Ait1 [242-RSSSSTYGS-230] to [242-AAAAAAAAA-230] MATa	This study
Gtr1-myc; GFP-Ait1	ACY2862	[ACY2643] Gtr1-myc [Trp]; GFP-Ait1 MATa	This study
Gtr1-myc; GFP-Ait1C3v2	ACY2977	[ACY2932] Gtr1-myc [Trp]; GFP-Ait1 [I211A] [L213A] [C216A] [I217A] [E218A] [R220A][I226A] MATa	This study
