# Supplementary figures and images for: Ait1 regulates TORC1 signaling and localization in budding yeast
Source: eLife journal article supplement (doi:10.7554/elife.68773), 2022-09-01

**A**

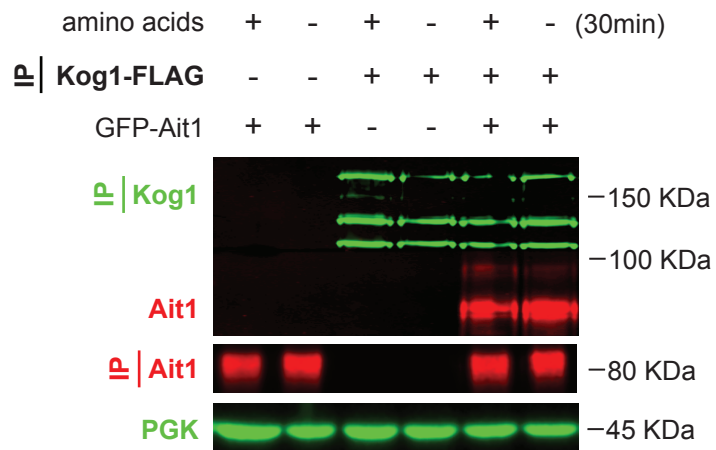

**B**

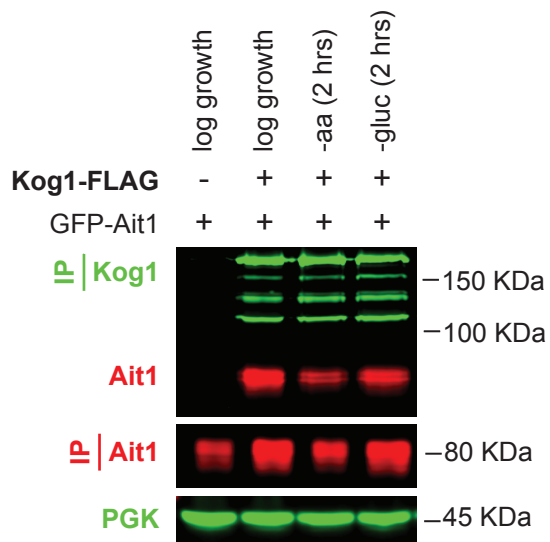

**C**

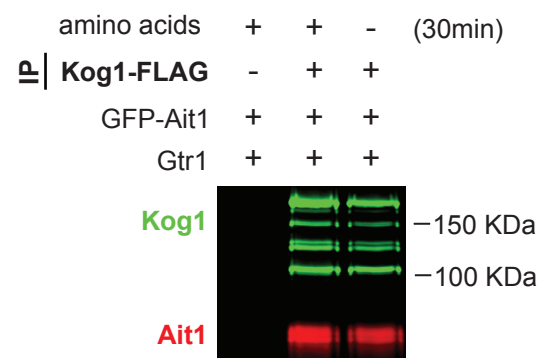

Supplement: supp [file elife_poa_e68773_Figure_3_figure_supplement_1.pdf › elife_poa_e68773_Figure_3_figure_supplement_1.pdf]

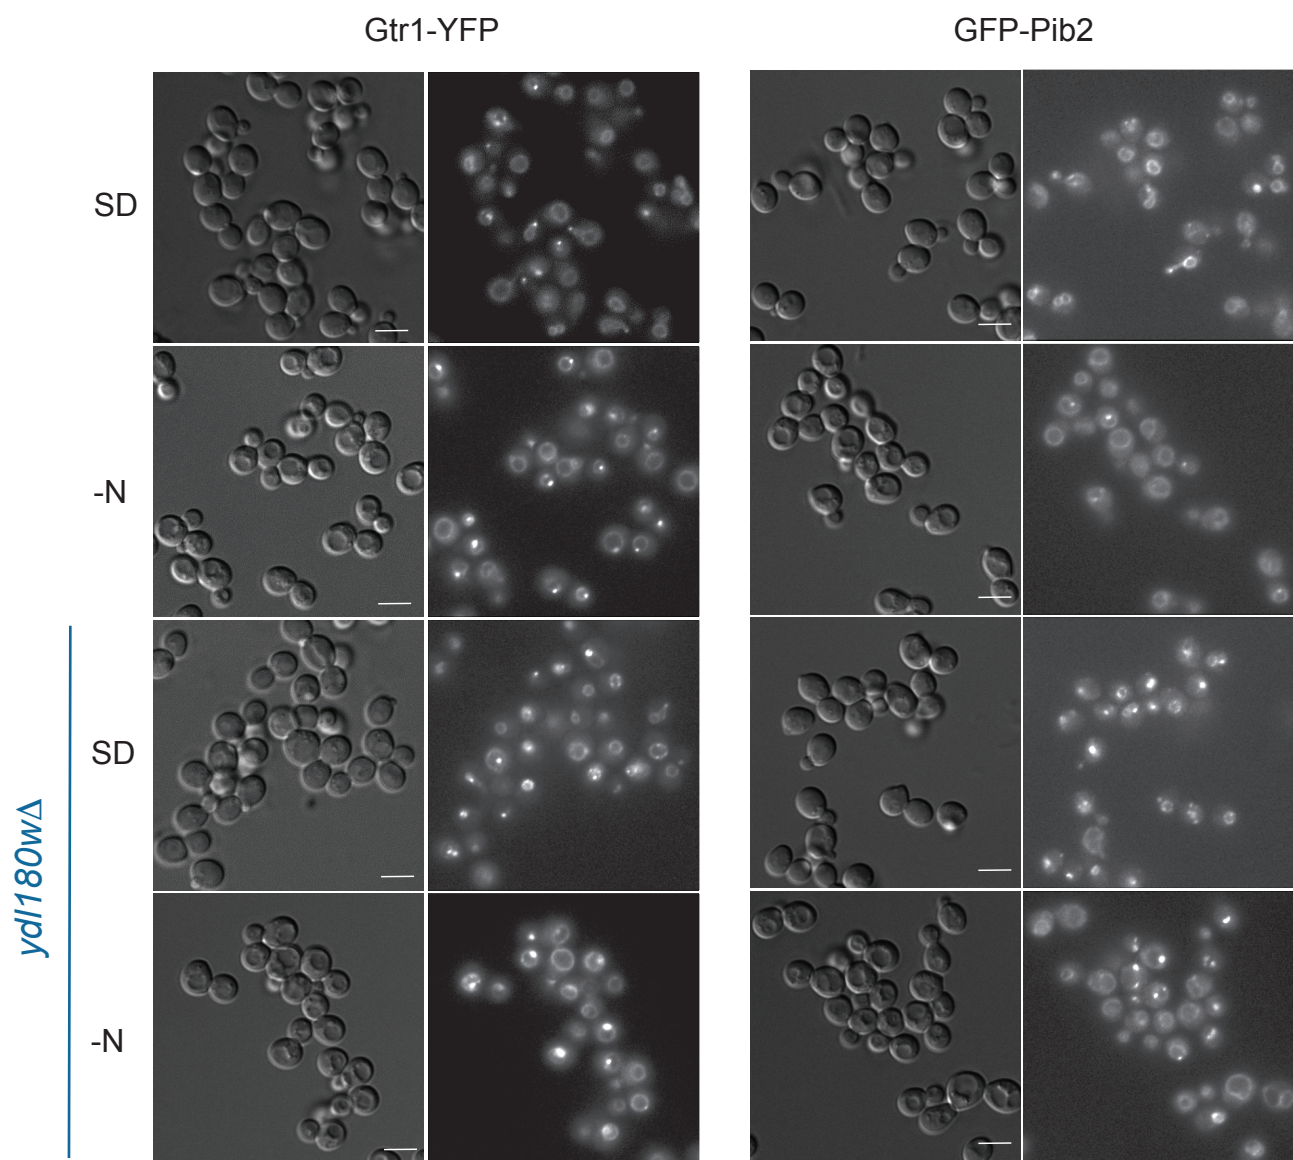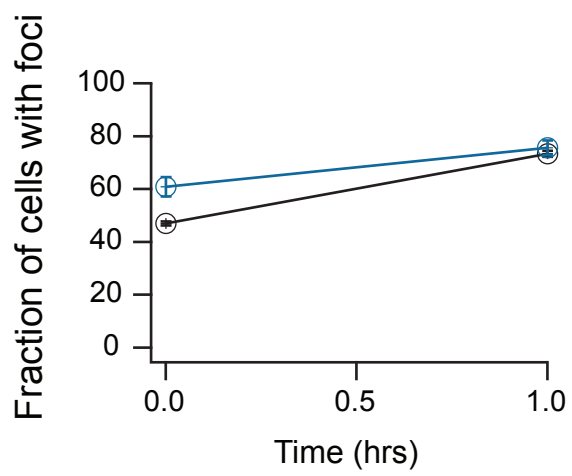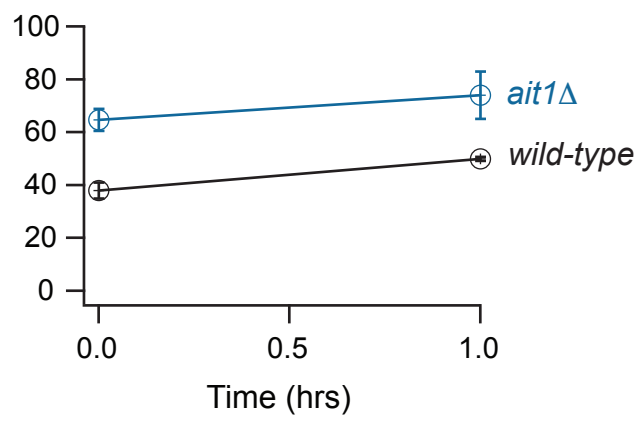

Supplement: supp [file elife_poa_e68773_Figure_5_figure_supplement_1.pdf › elife_poa_e68773_Figure_5_figure_supplement_1.pdf]

**A**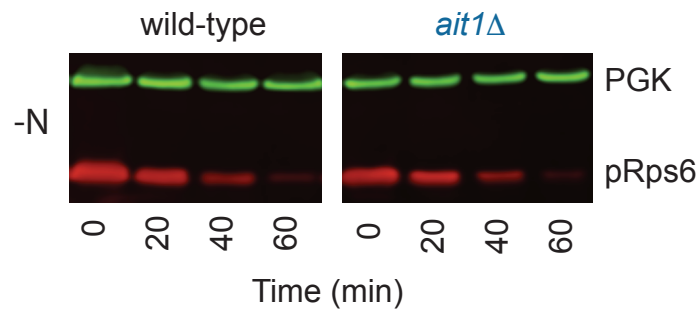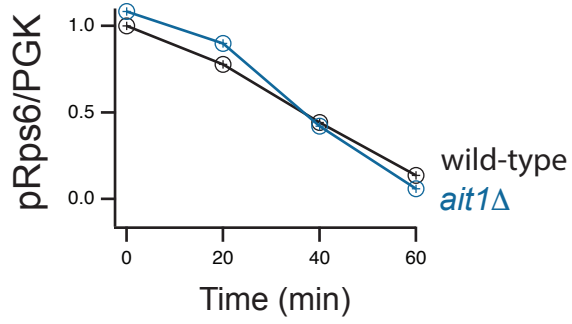**B**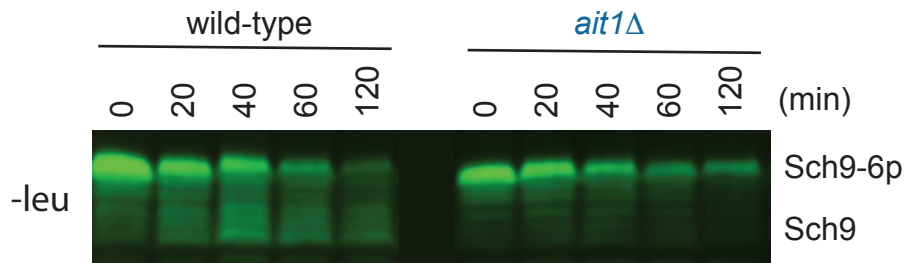

Supplement: supp [file elife_poa_e68773_Figure_6_figure_supplement_1.pdf › elife_poa_e68773_Figure_6_figure_supplement_1.pdf]

*wild-type*

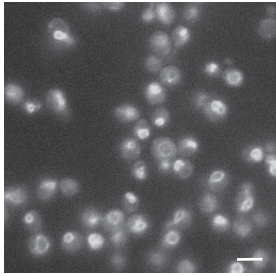

*ait1 $\Delta$ C4*

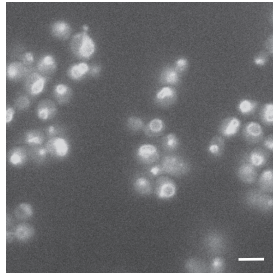

*ait1 $\Delta$ C3*

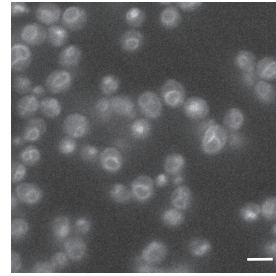

*ait1C3v1*

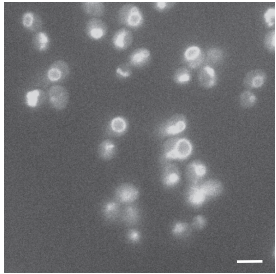

*ait1C3v2*

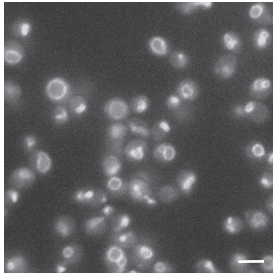

*ait1C3v3*

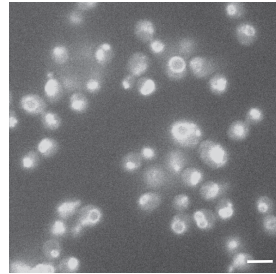

Supplement: supp [file elife_poa_e68773_Figure_8_figure_supplement_1.pdf › elife_poa_e68773_Figure_8_figure_supplement_1.pdf]

**A**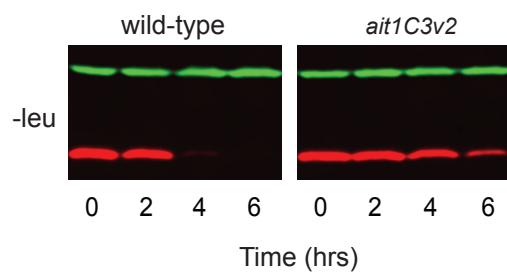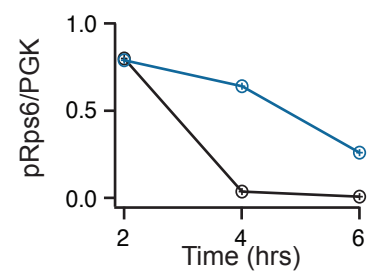**B**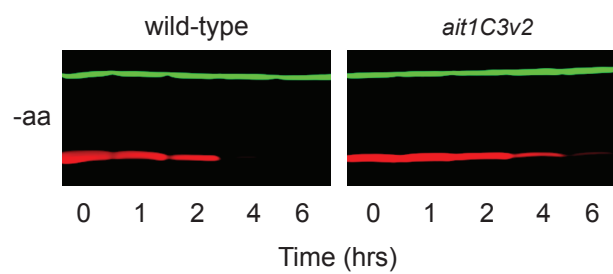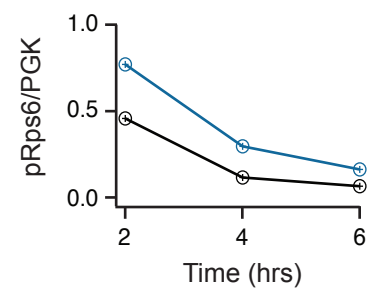**C**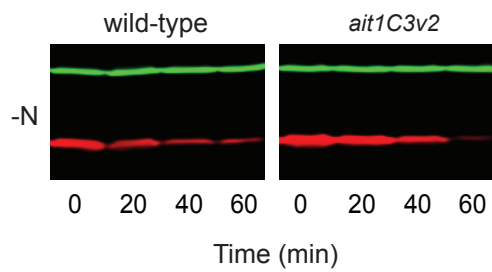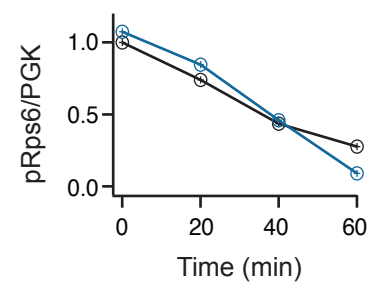

Supplement: supp [file elife_poa_e68773_Figure_8_figure_supplement_3.pdf › elife_poa_e68773_Figure_8_figure_supplement_3.pdf]

**A**

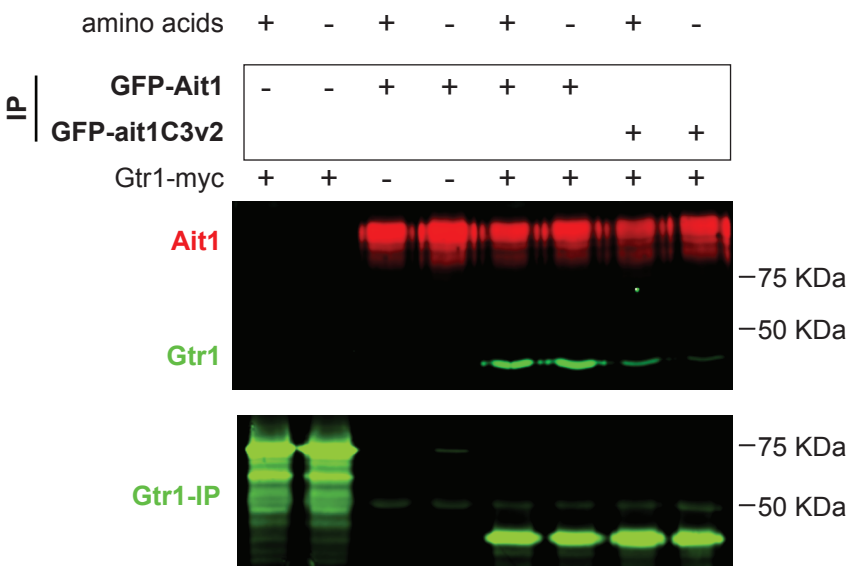

**B**

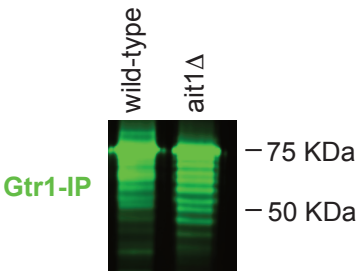

**C**

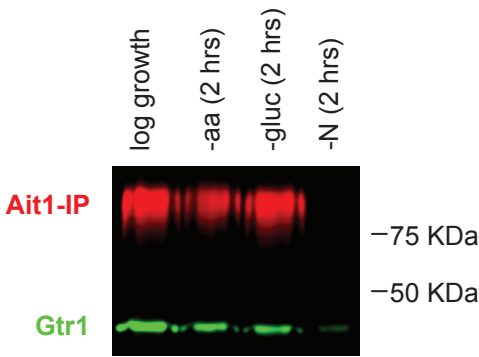

Supplement: supp [file elife_poa_e68773_Figure_9_figure_supplement_1.pdf › elife_poa_e68773_Figure_9_figure_supplement_1.pdf]

Kog1-FLAG IPs +/- nutrients

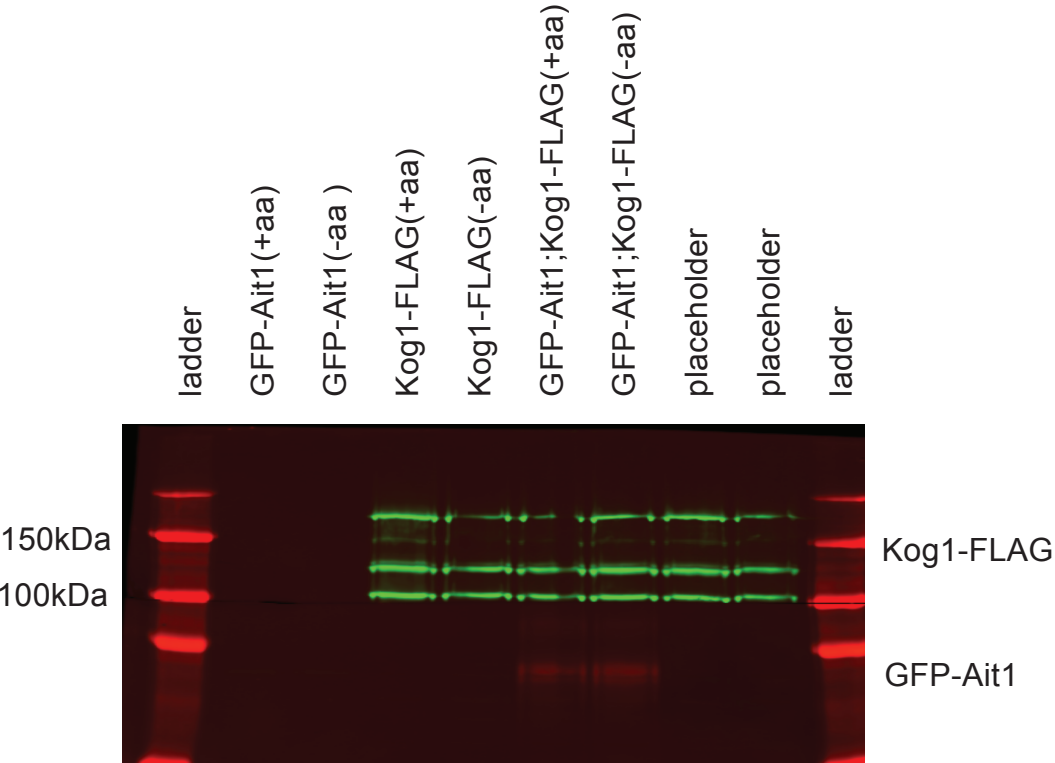

Supplement: supp [file Figure3-figure supplement 1-source data 1 label.pdf › labelled gel figures/Figure3-figure supplement 1-source data 1 label.pdf]

GFP-Ait1 IPs +/- nutrients

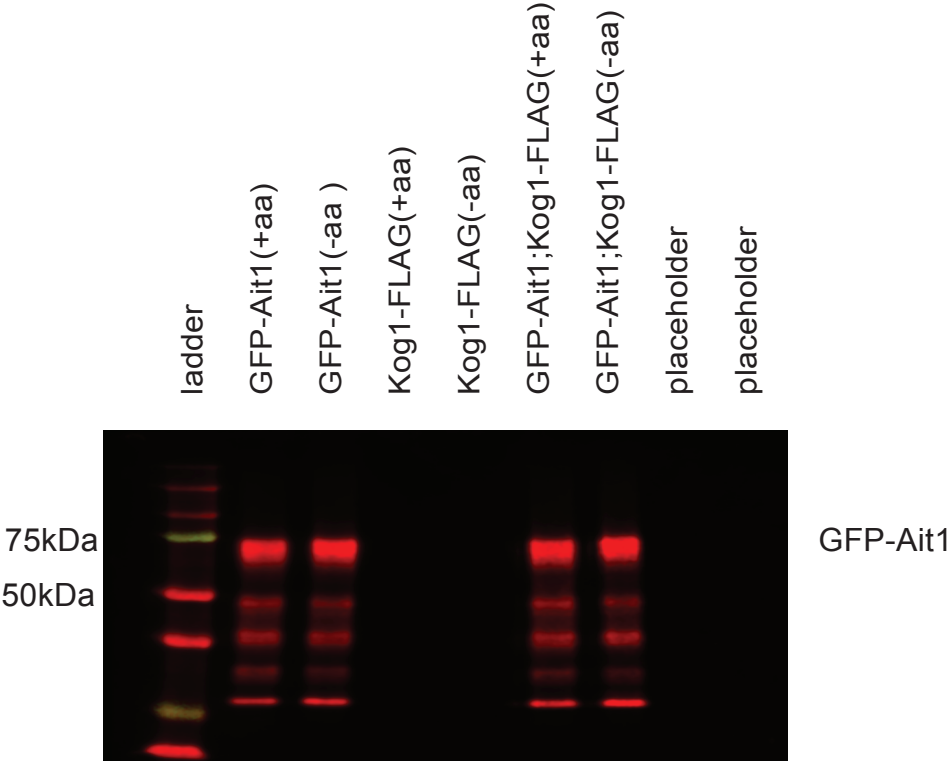

Supplement: supp [file Figure3-figure supplement 1-source data 2 label.pdf › labelled gel figures/Figure3-figure supplement 1-source data 2 label.pdf]

PGK +/- nutrients

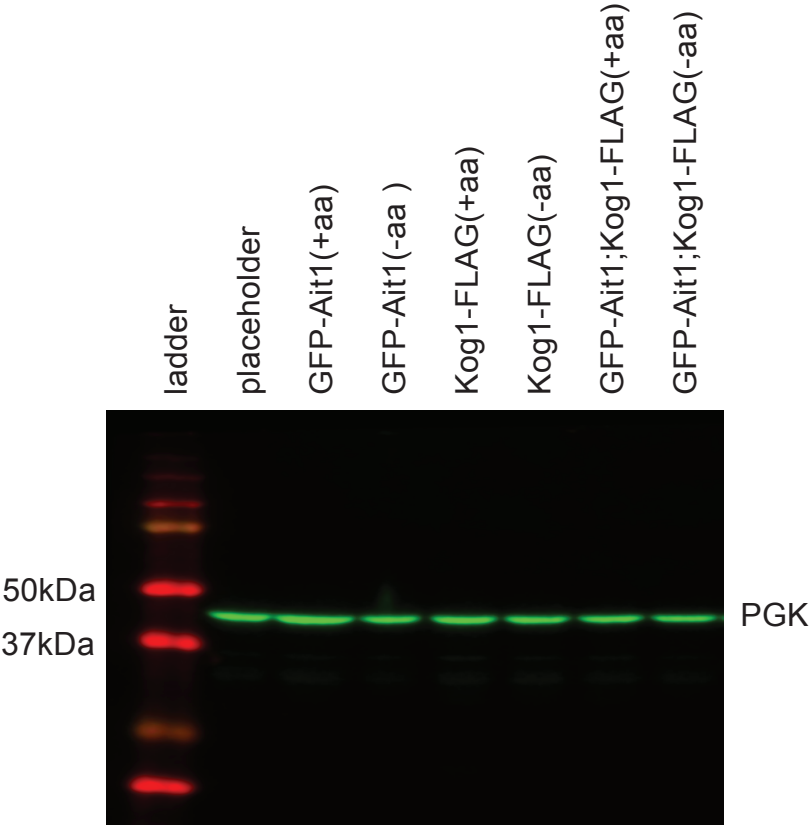

Supplement: supp [file Figure3-figure supplement 1-source data 3 label.pdf › labelled gel figures/Figure3-figure supplement 1-source data 3 label.pdf]

Kog1-FLAG IPs +/- nutrients

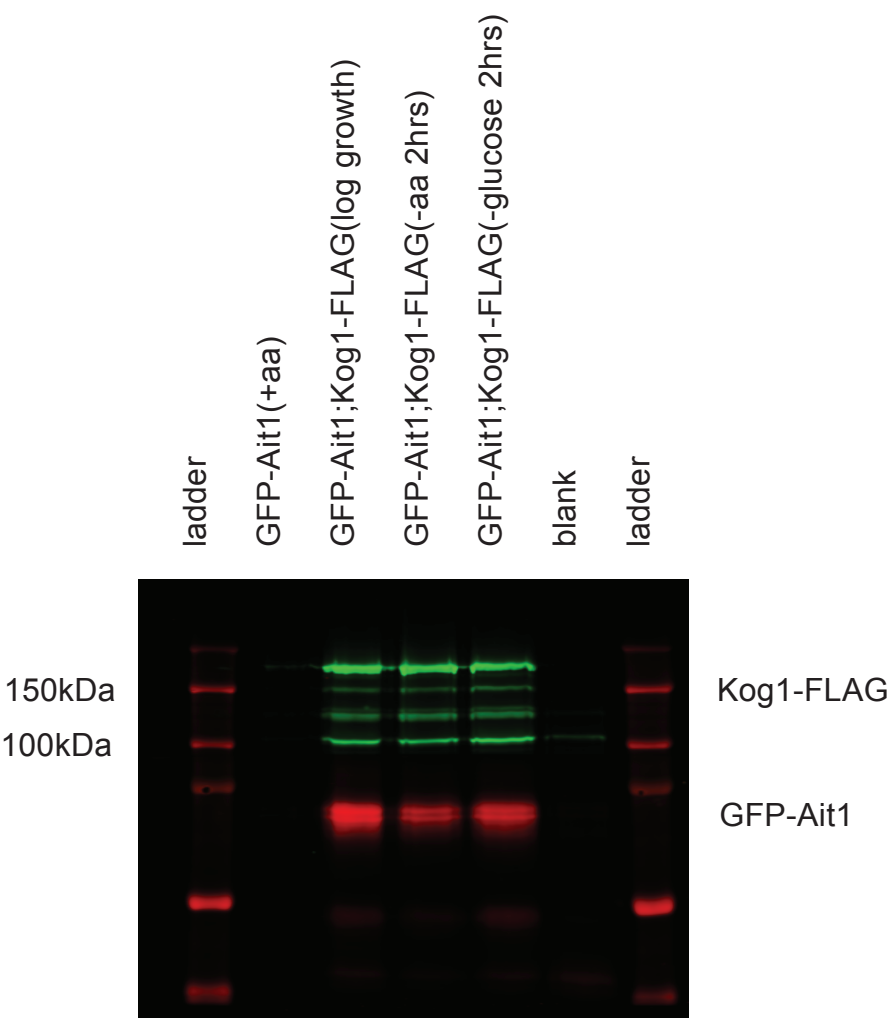

Supplement: supp [file Figure3-figure supplement 1-source data 4 label.pdf › labelled gel figures/Figure3-figure supplement 1-source data 4 label.pdf]

GFP-Ait1 IPs +/- nutrients

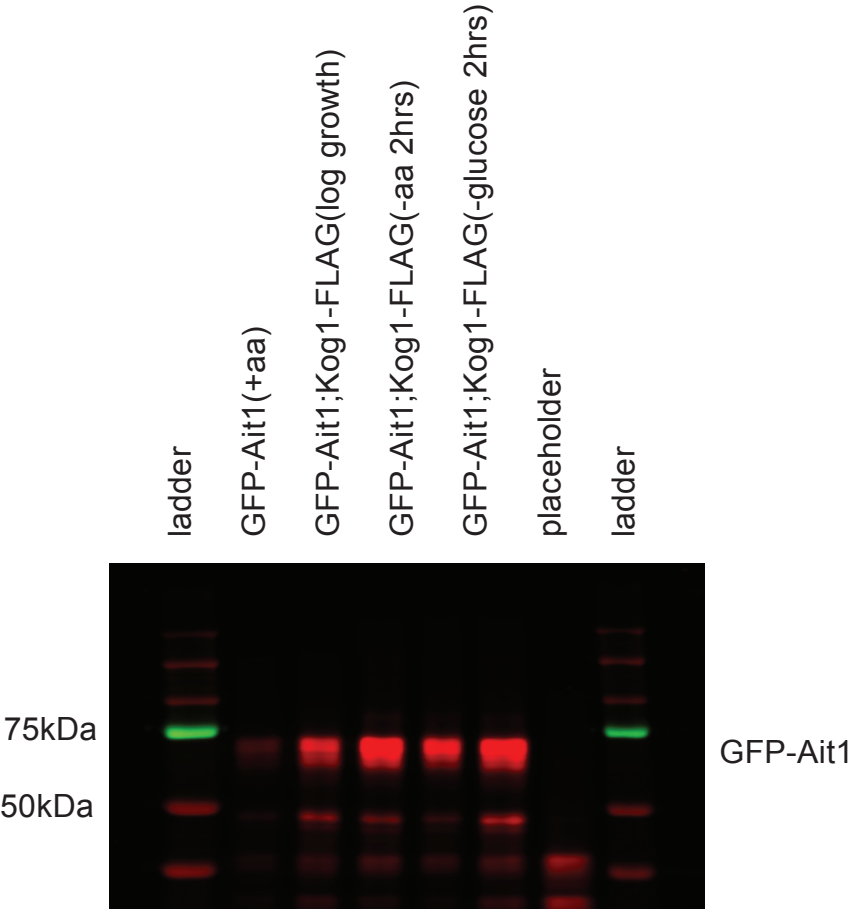

Supplement: supp [file Figure3-figure supplement 1-source data 5 label.pdf › labelled gel figures/Figure3-figure supplement 1-source data 5 label.pdf]

PGK +/- nutrients

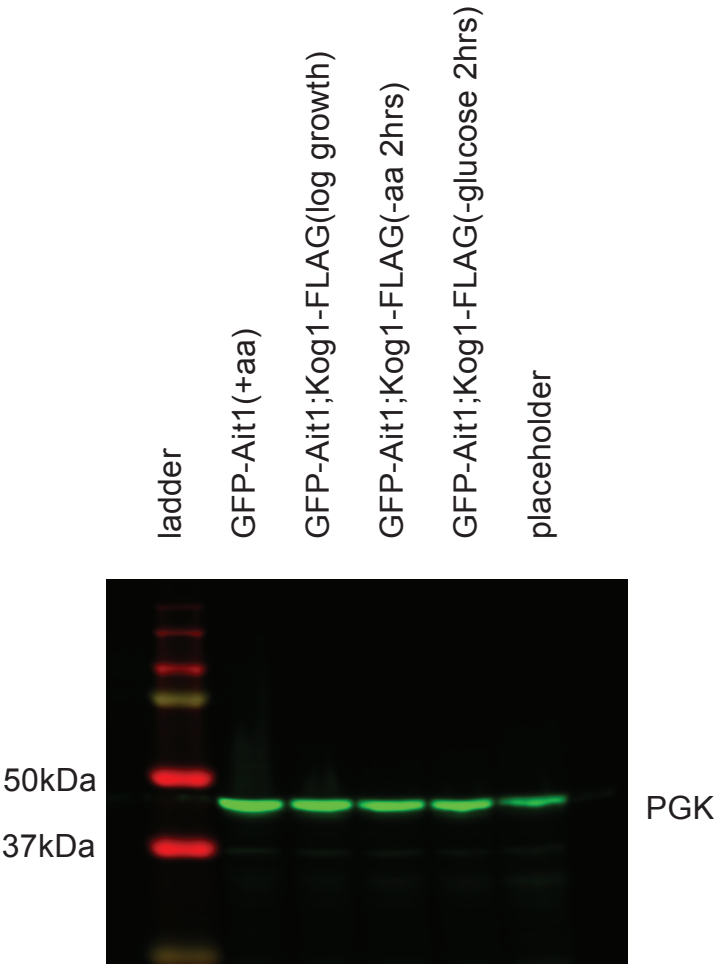

Supplement: supp [file Figure3-figure supplement 1-source data 6 label.pdf › labelled gel figures/Figure3-figure supplement 1-source data 6 label.pdf]

Kog1-FLAG IPs +/- nutrients

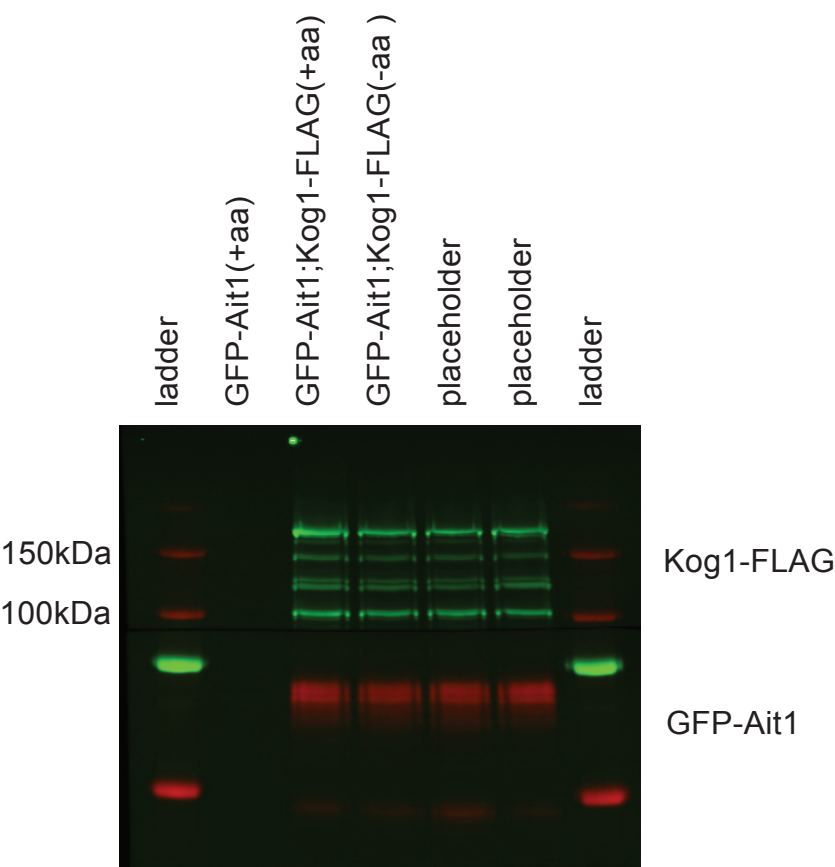

Supplement: supp [file Figure3-figure supplement 1-source data 7 label.pdf › labelled gel figures/Figure3-figure supplement 1-source data 7 label.pdf]

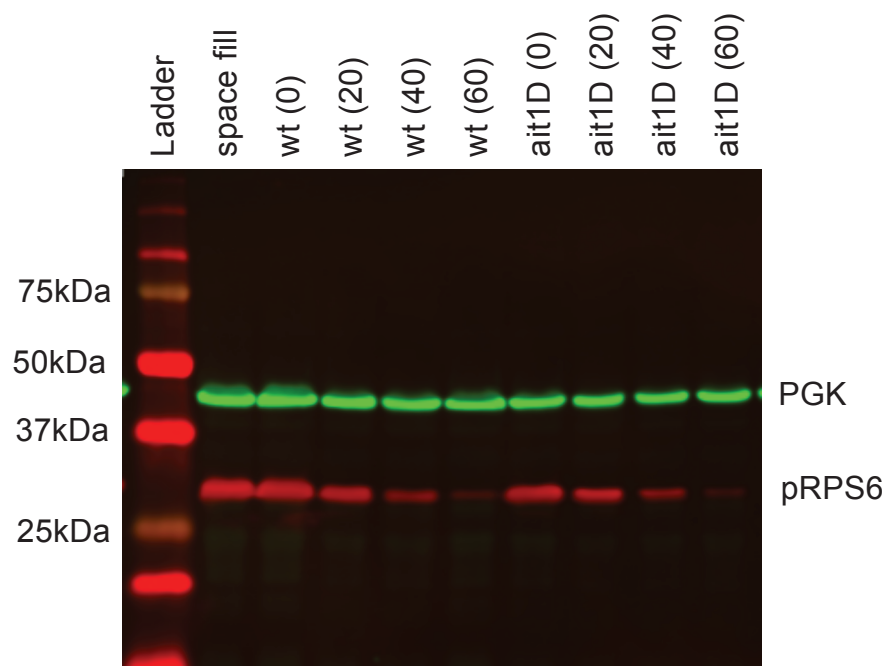

Supplement: supp [file Figure6-figure supplement 1-source data 1 label.pdf › labelled gel figures/Figure6-figure supplement 1-source data 1 label.pdf]

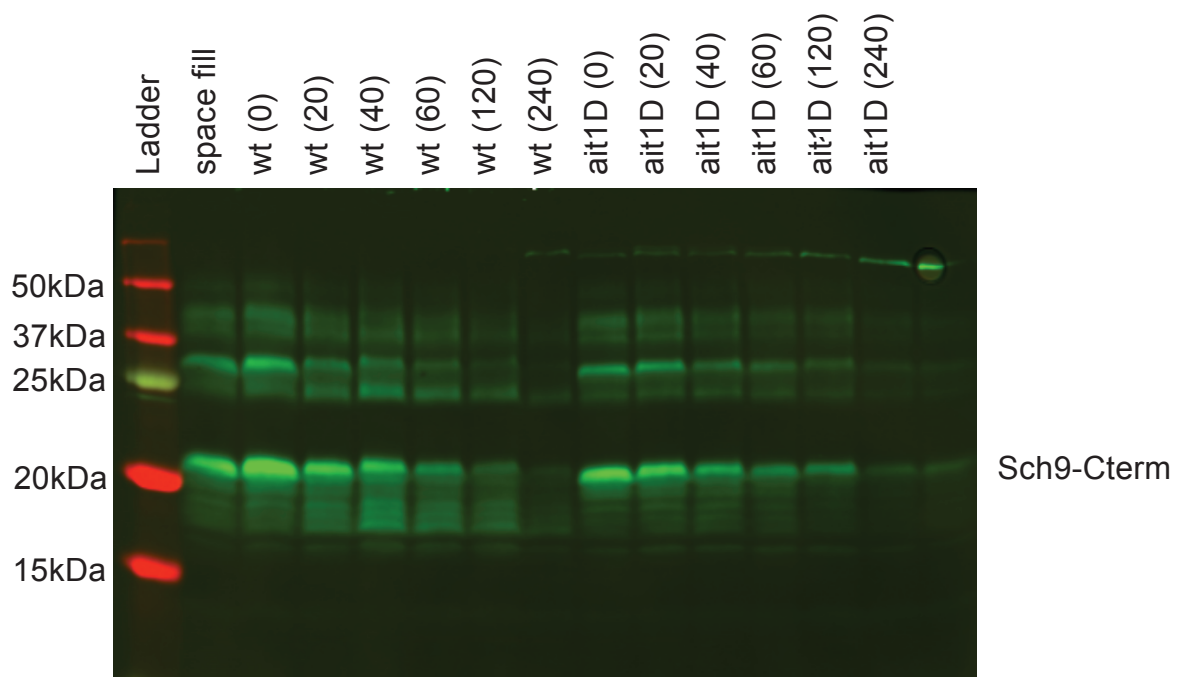

Supplement: supp [file Figure6-figure supplement 1-source data 2 label.pdf › labelled gel figures/Figure6-figure supplement 1-source data 2 label.pdf]

## amino acid starvation

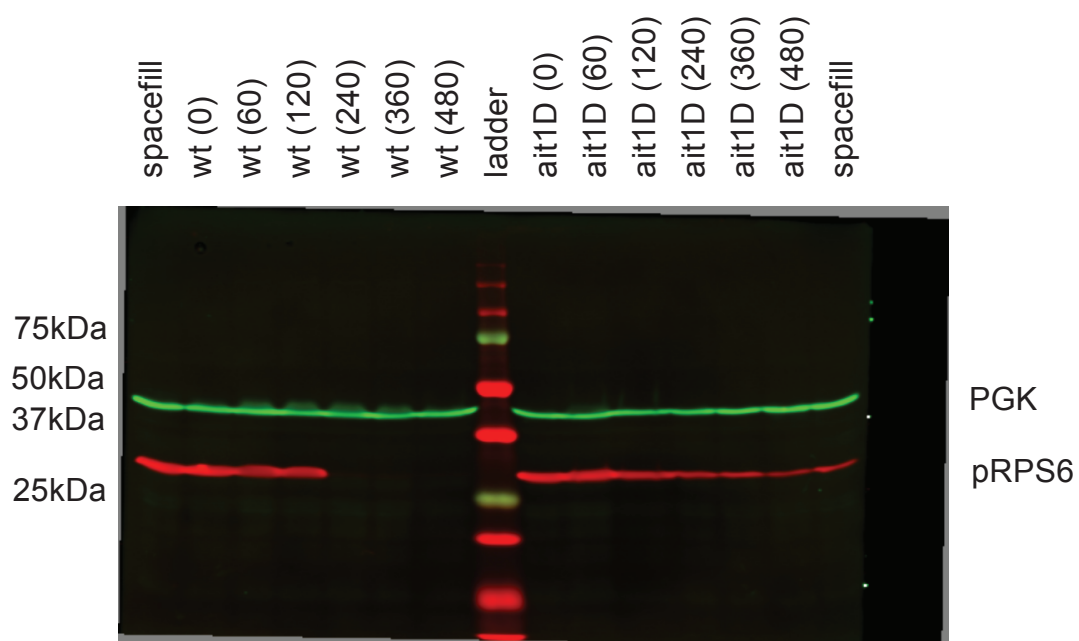

Supplement: supp [file Figure6-source data 1 label.pdf › labelled gel figures/Figure6-source data 1 label.pdf]

leucine starvation

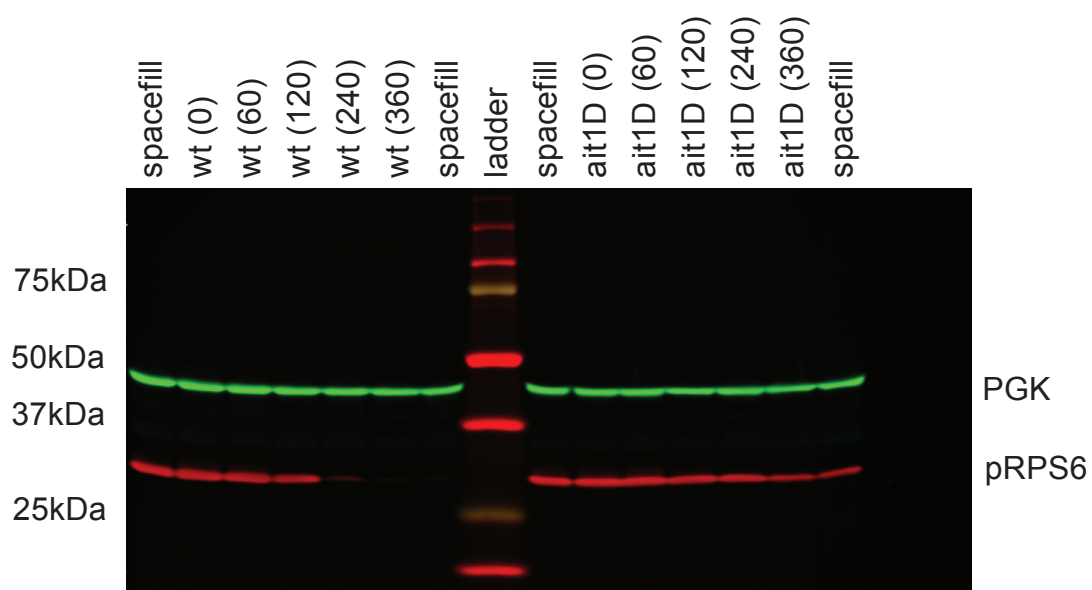

Supplement: supp [file Figure6-source data 2 label.pdf › labelled gel figures/Figure6-source data 2 label.pdf]

amino acid starvation

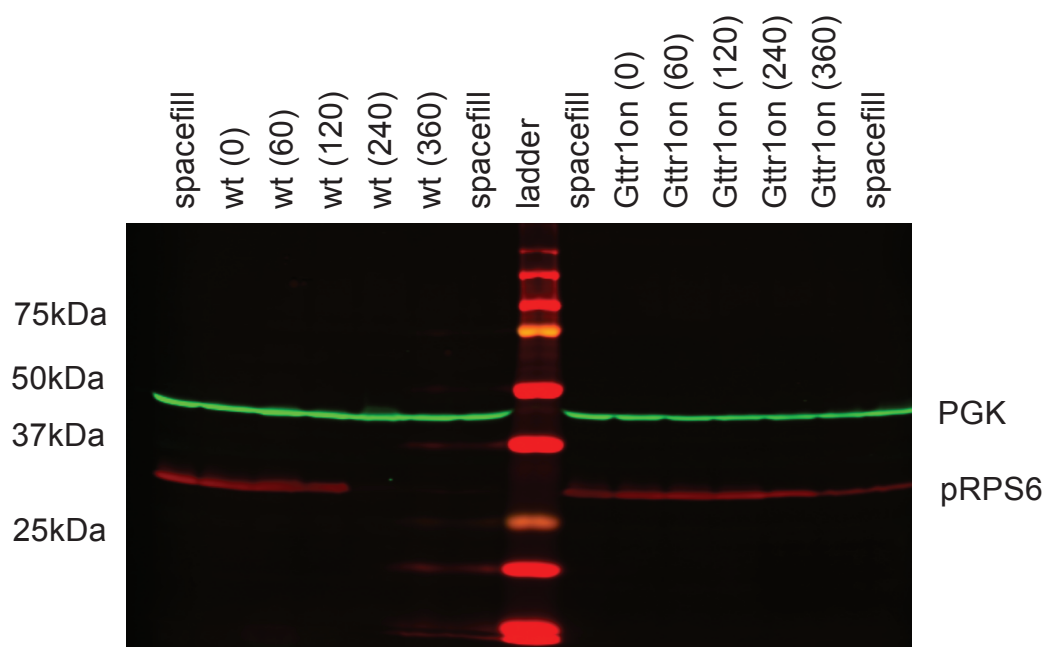

Supplement: supp [file Figure6-source data 3 label.pdf › labelled gel figures/Figure6-source data 3 label.pdf]

leucine starvation

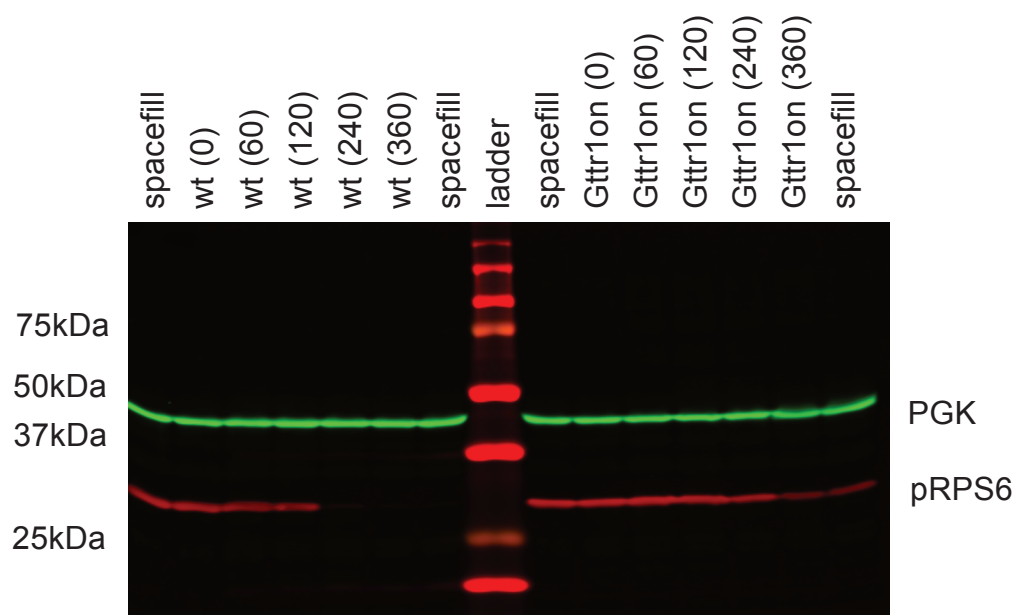

Supplement: supp [file Figure6-source data 4 label.pdf › labelled gel figures/Figure6-source data 4 label.pdf]

# Gtr1 off background

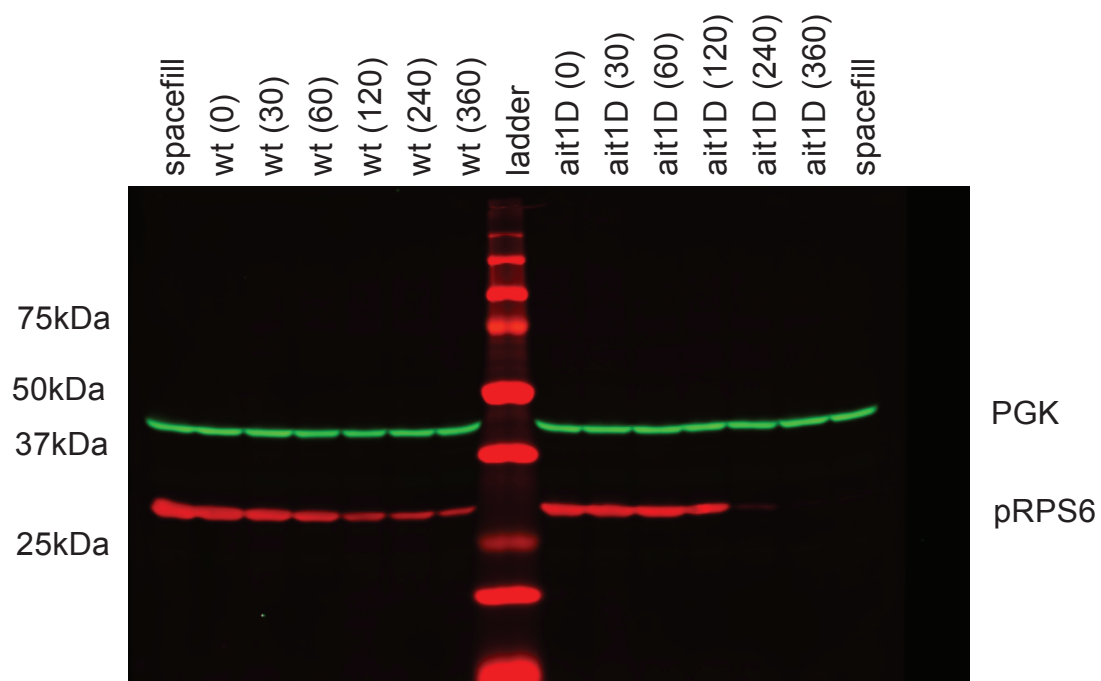

Supplement: supp [file Figure7-source data 1 label.pdf › labelled gel figures/Figure7-source data 1 label.pdf]

## Gtr2off background

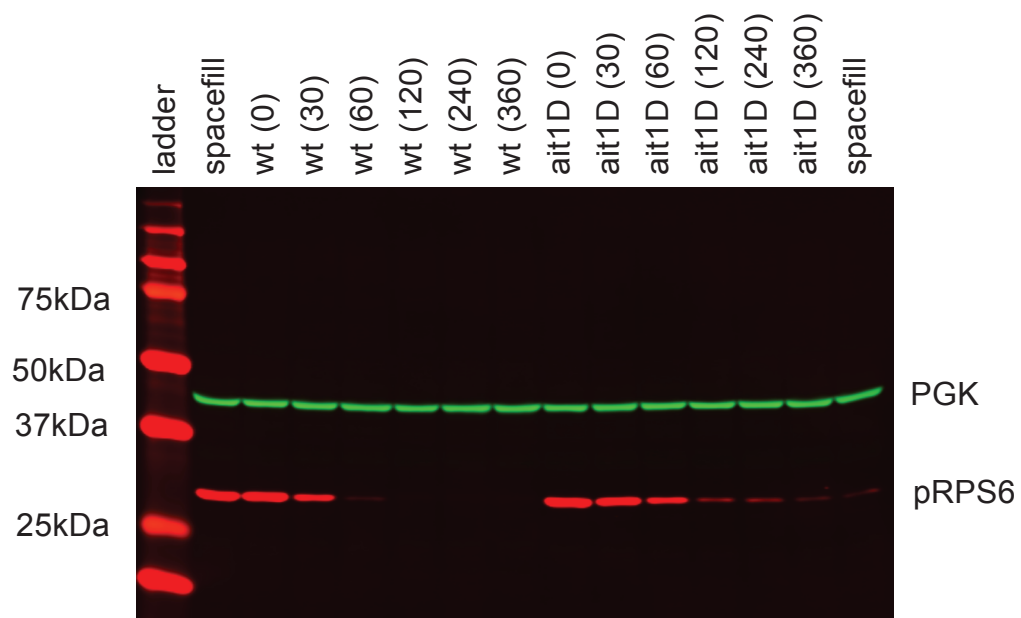

Supplement: supp [file Figure7-source data 2 label.pdf › labelled gel figures/Figure7-source data 2 label.pdf]

# Gtr1/2off background

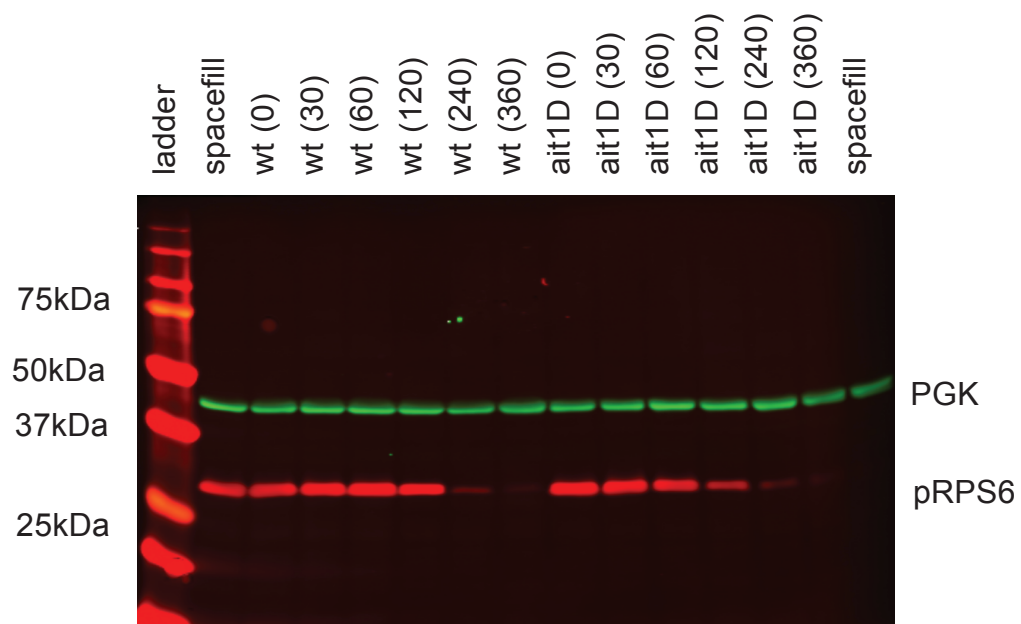

Supplement: supp [file Figure7-source data 3 label.pdf › labelled gel figures/Figure7-source data 3 label.pdf]

## Gtr1 delete background

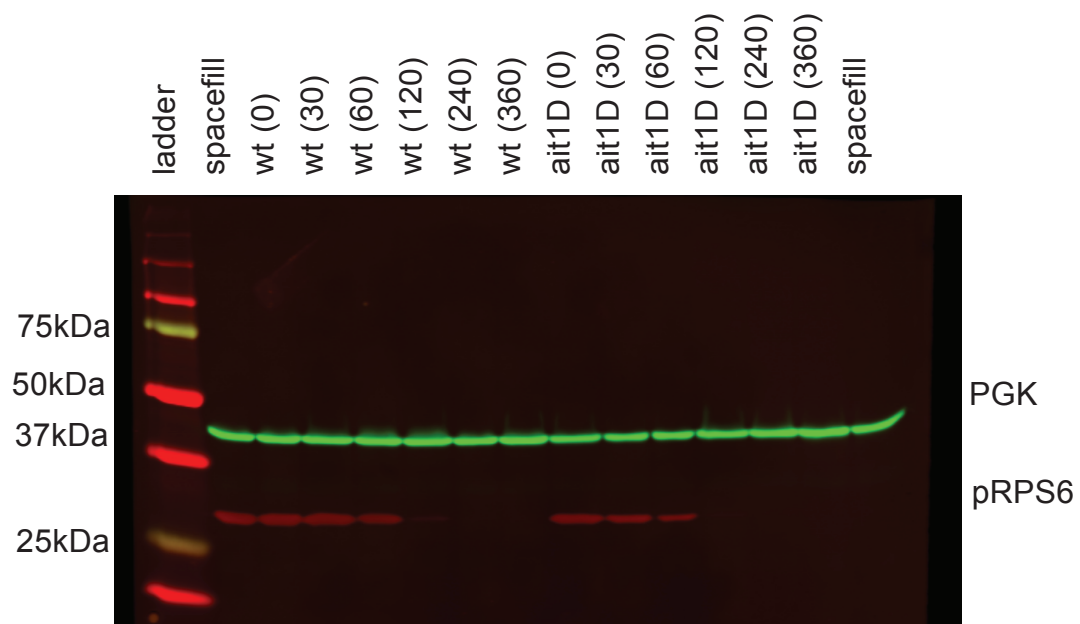

Supplement: supp [file Figure7-source data 4 label.pdf › labelled gel figures/Figure7-source data 4 label.pdf]

## Gtr2 delete background

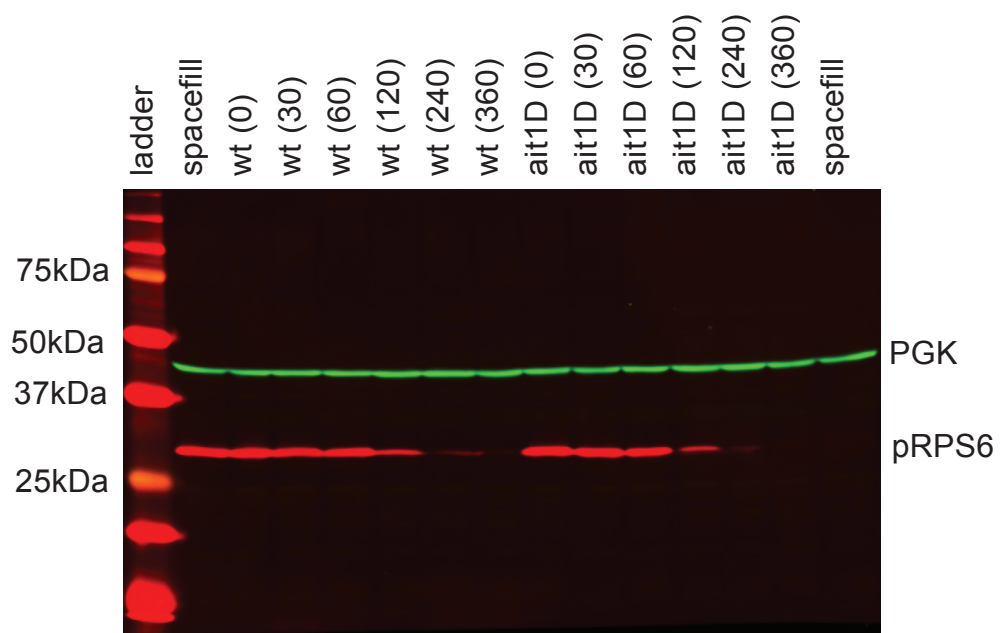

Supplement: supp [file Figure7-source data 5 label.pdf › labelled gel figures/Figure7-source data 5 label.pdf]

# Gtr1/2 delete background

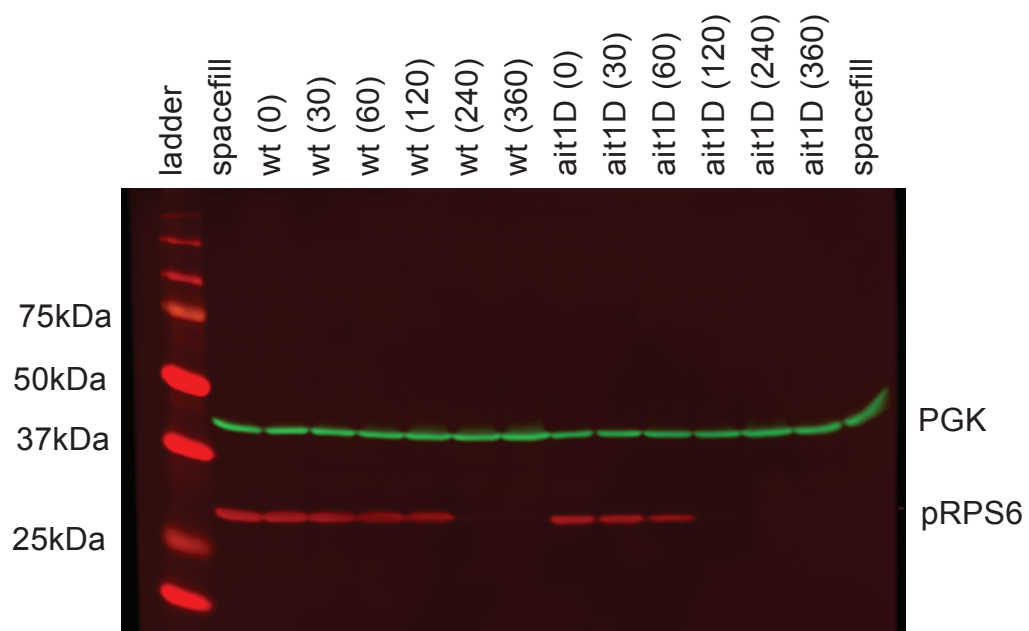

Supplement: supp [file Figure7-source data 6 label.pdf › labelled gel figures/Figure7-source data 6 label.pdf]

## Prm1+2 mutant background

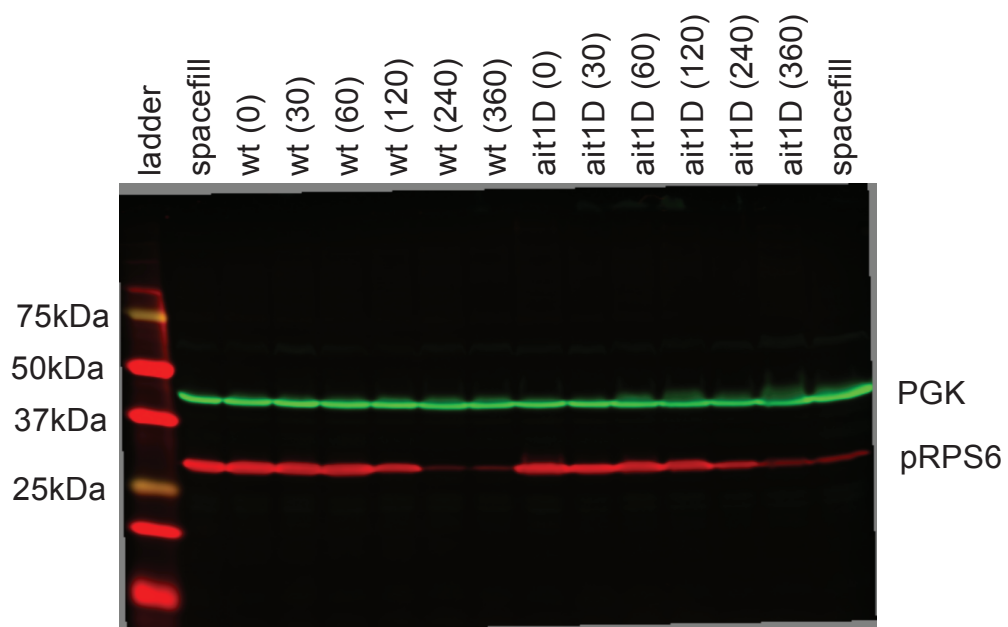

Supplement: supp [file Figure7-source data 7 label.pdf › labelled gel figures/Figure7-source data 7 label.pdf]

## Ait1v2 mutant replicate

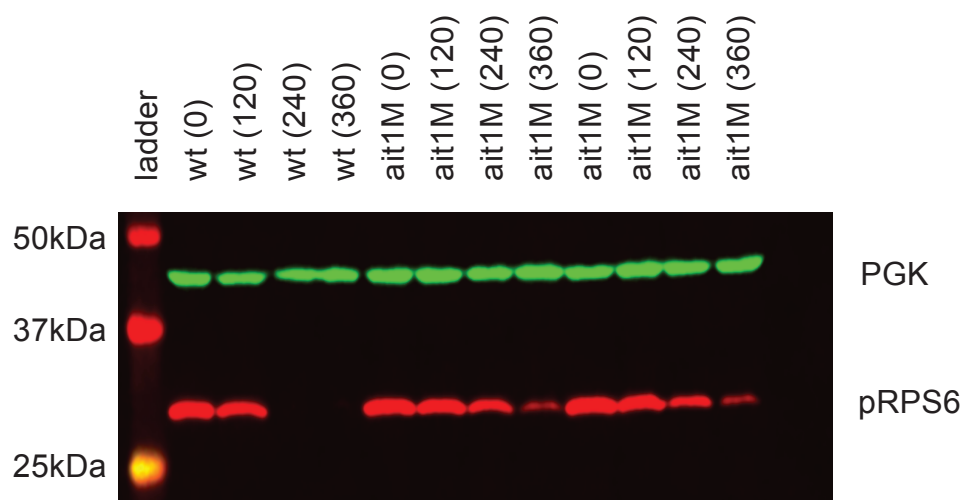

Supplement: supp [file Figure8-figure supplement 3-source data 1 label.pdf › labelled gel figures/Figure8-figure supplement 3-source data 1 label.pdf]

## Ait1v2 mutant in amino acid starvation

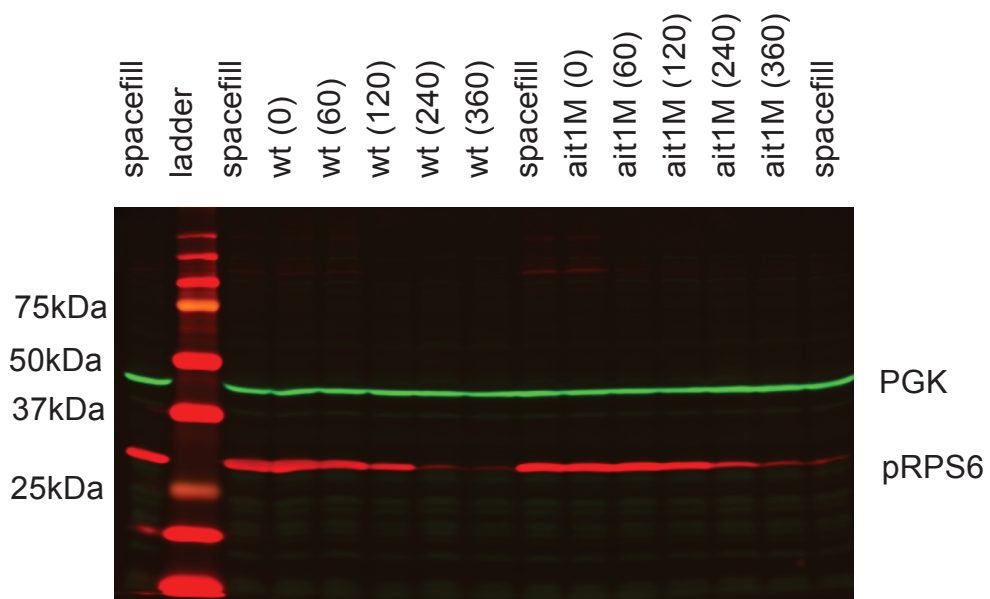

Supplement: supp [file Figure8-figure supplement 3-source data 2 label.pdf › labelled gel figures/Figure8-figure supplement 3-source data 2 label.pdf]

## Ait1v2 mutant in nitrogen starvation

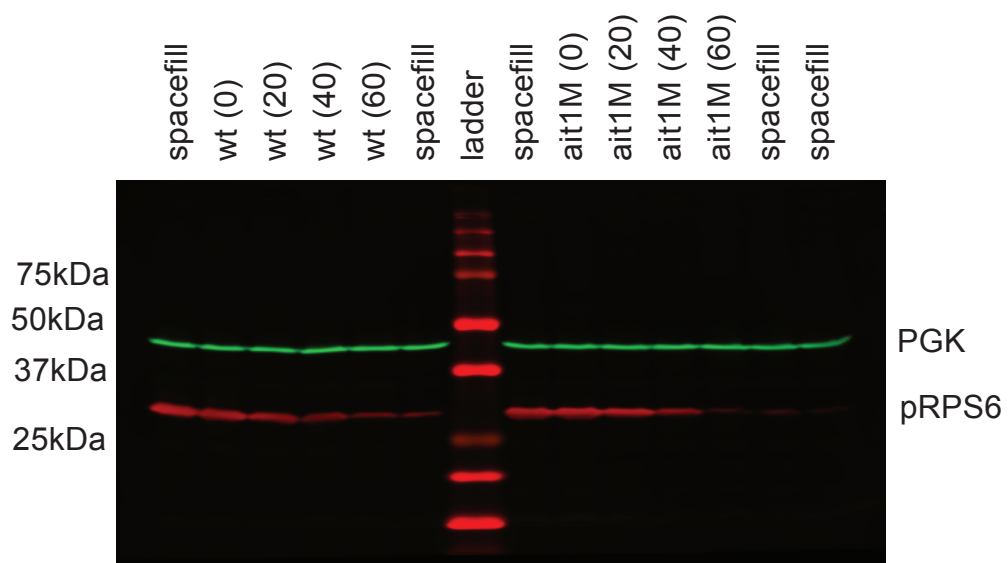

Supplement: supp [file Figure8-figure supplement 3-source data 3 label.pdf › labelled gel figures/Figure8-figure supplement 3-source data 3 label.pdf]

## Ait1C4 mutant

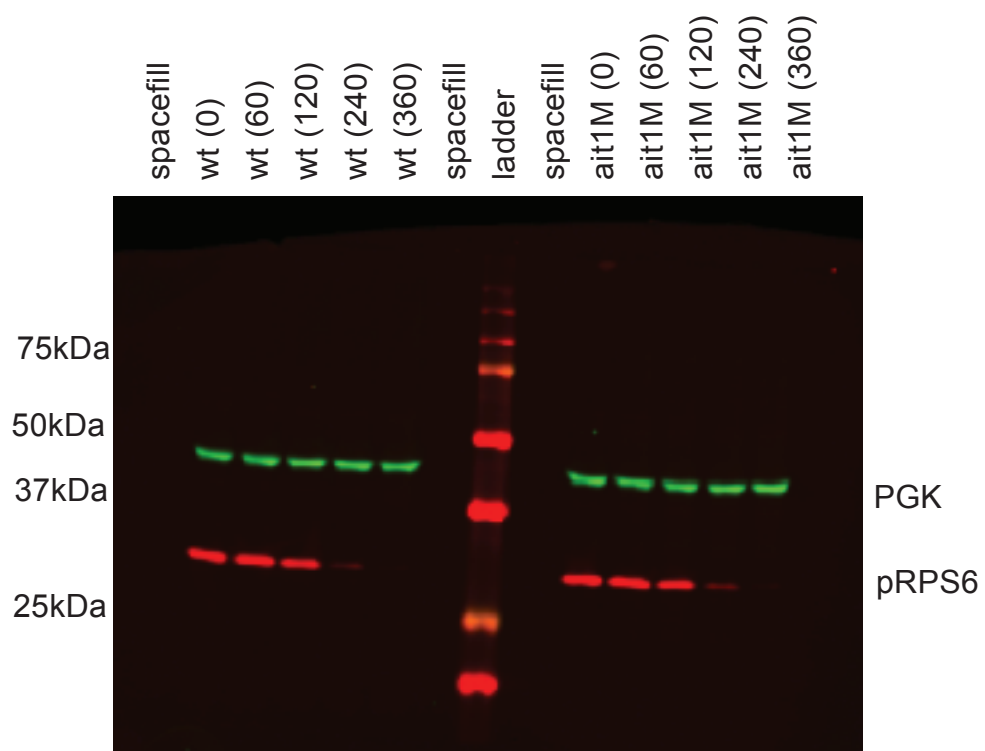

Supplement: supp [file Figure8-source data 1 label.pdf › labelled gel figures/Figure8-source data 1 label.pdf]

## Ait1DC3 mutant

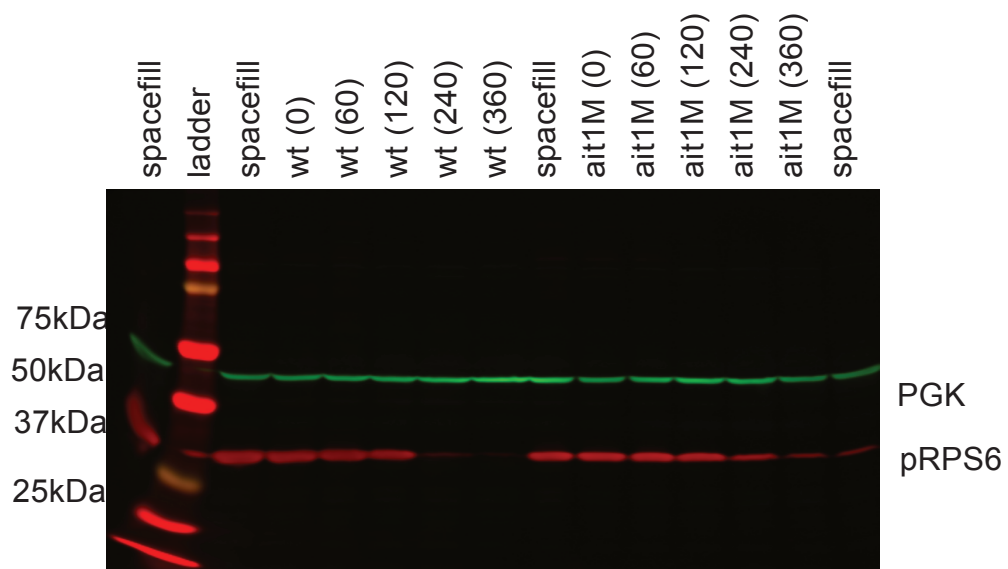

Supplement: supp [file Figure8-source data 2 label.pdf › labelled gel figures/Figure8-source data 2 label.pdf]

## Ait1v1 mutant

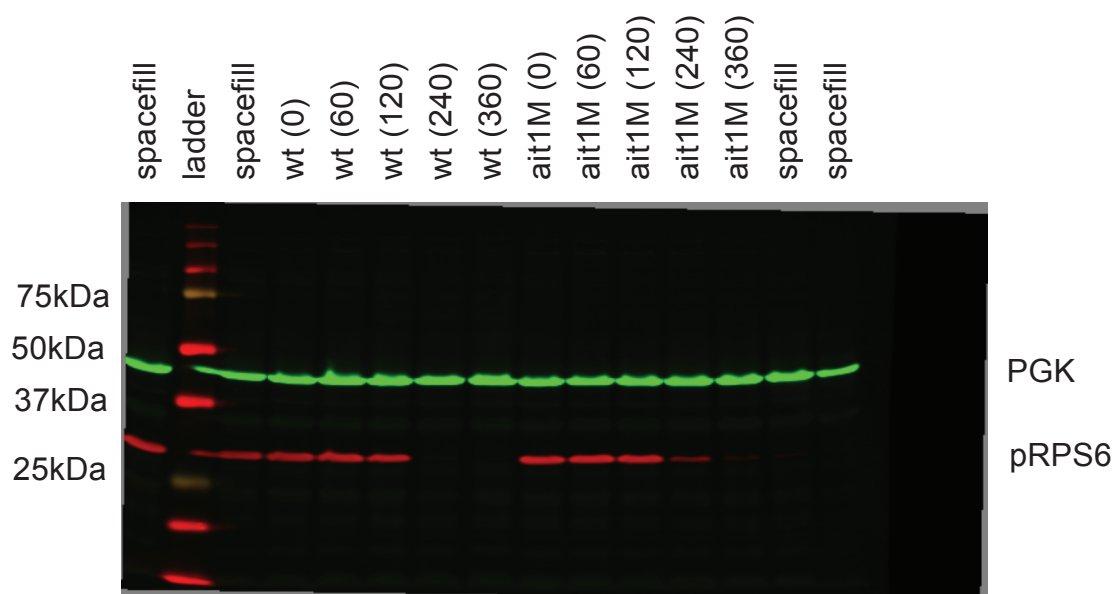

Supplement: supp [file Figure8-source data 3 label.pdf › labelled gel figures/Figure8-source data 3 label.pdf]

## Ait1v2 mutant

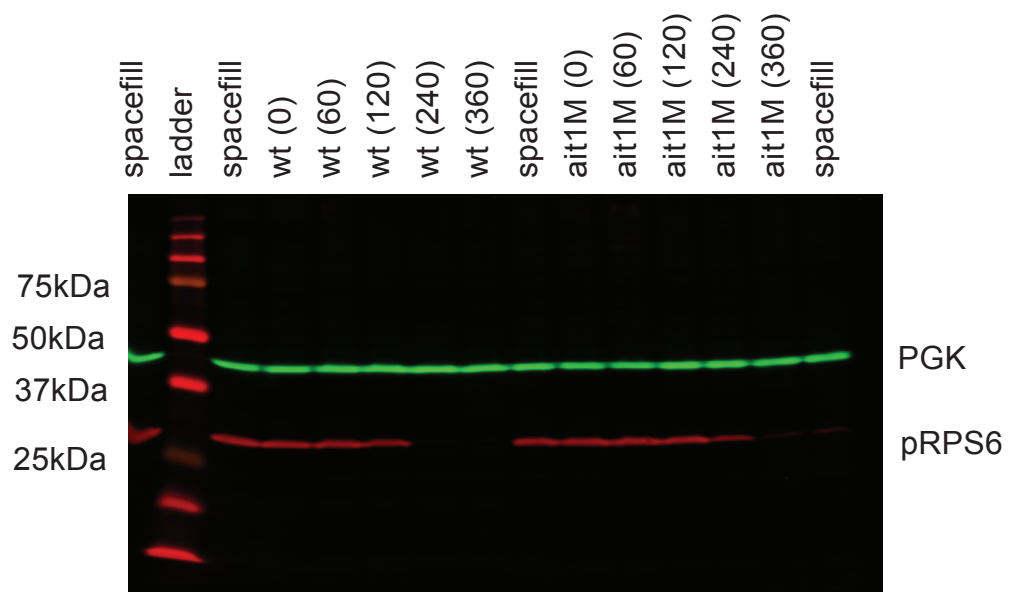

Supplement: supp [file Figure8-source data 4 label.pdf › labelled gel figures/Figure8-source data 4 label.pdf]

# Ait1v3 mutant

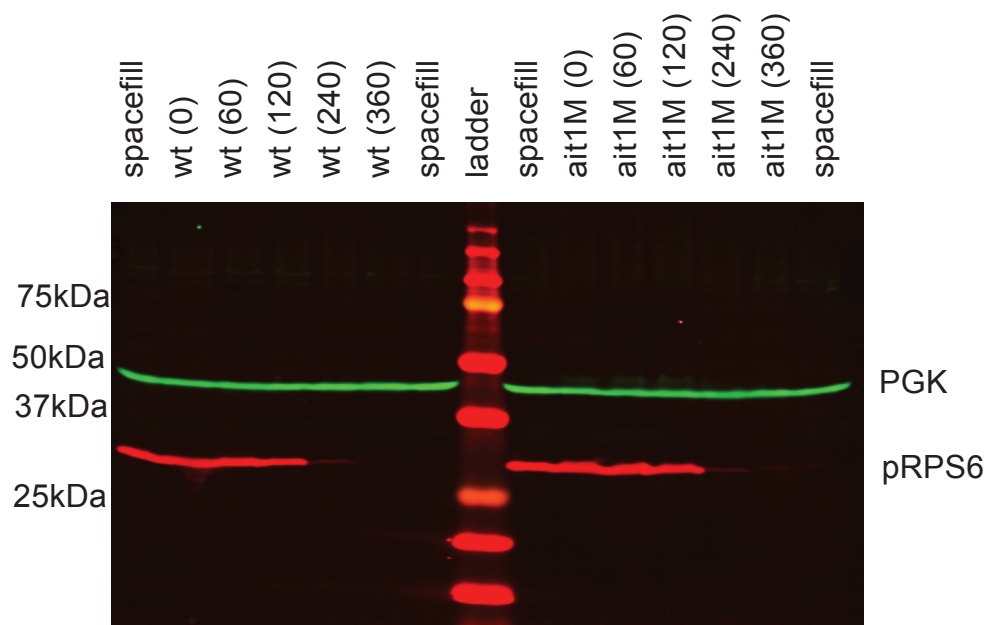

Supplement: supp [file Figure8-source data 5 label.pdf › labelled gel figures/Figure8-source data 5 label.pdf]

Gtr1-Myc IPs +/- amino acids

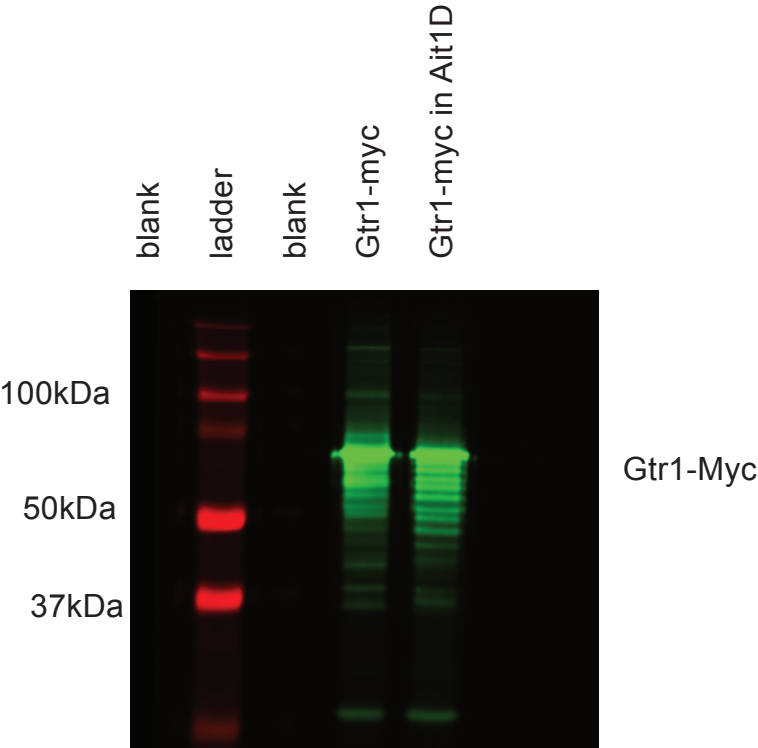

Supplement: supp [file Figure9-figure supplement 1-source data 1 label.pdf › labelled gel figures/Figure9-figure supplement 1-source data 1 label.pdf]

GFP-Ait1 IPs +/- nutrients

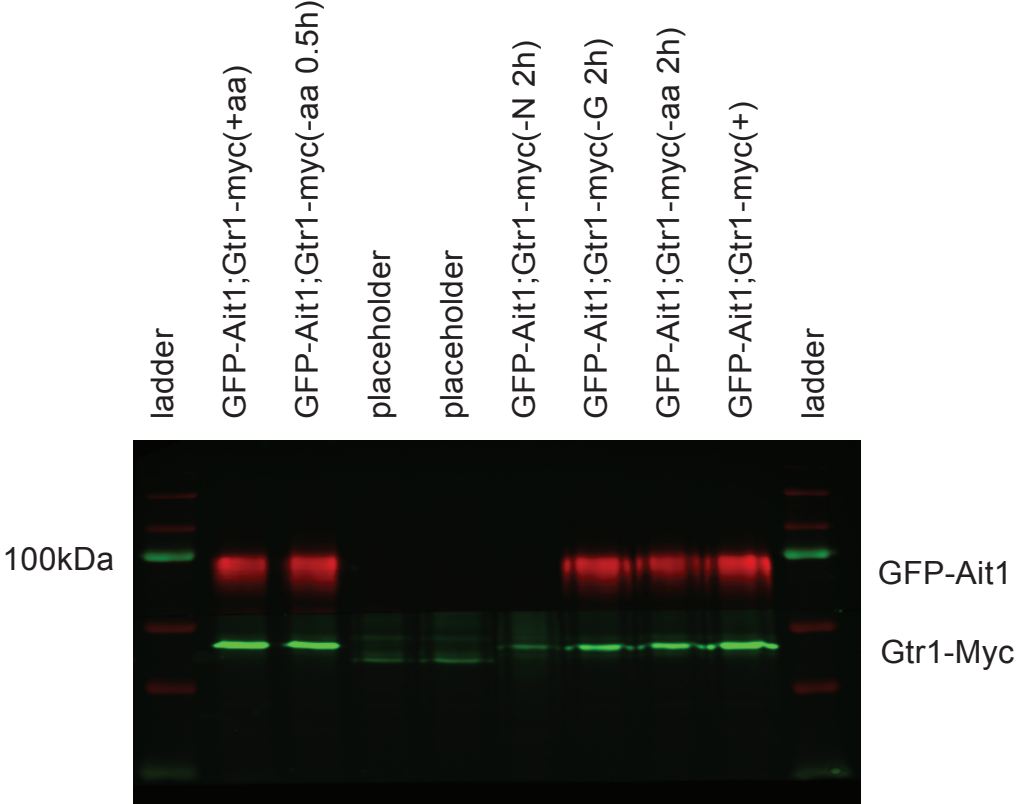

Supplement: supp [file Figure9-figure supplement 1-source data 2 label.pdf › labelled gel figures/Figure9-figure supplement 1-source data 2 label.pdf]

GFP-Ait1 IPs +/- amino acids

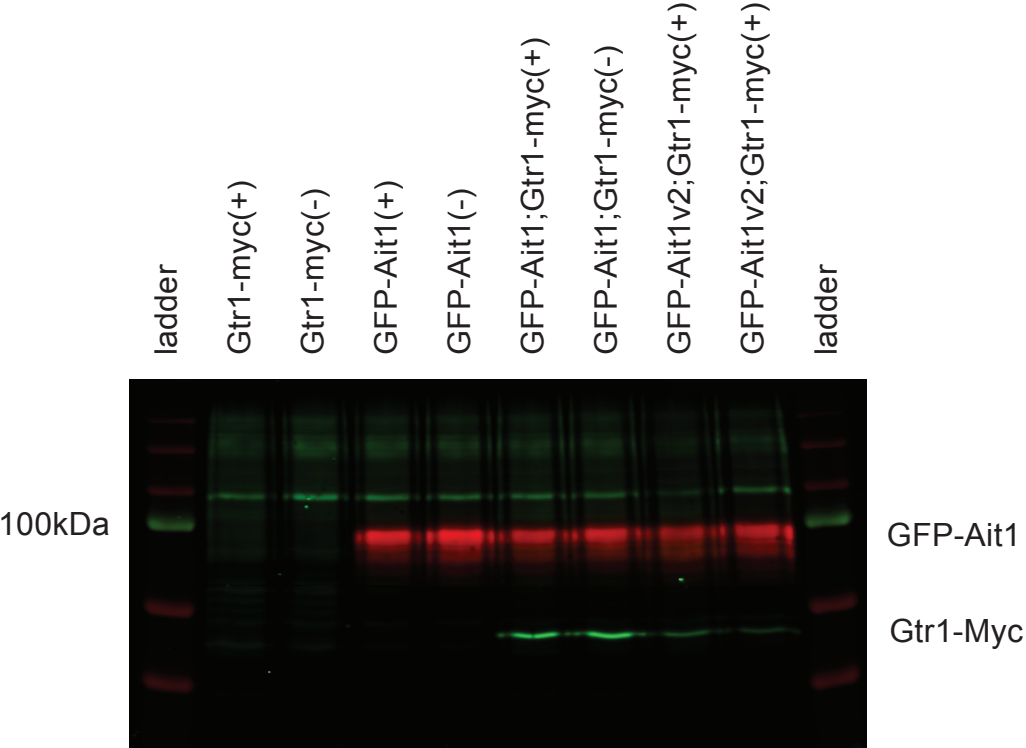

Supplement: supp [file Figure9-source data 1 label.pdf › labelled gel figures/Figure9-source data 1 label.pdf]

Gtr1-Myc IPs +/- amino acids

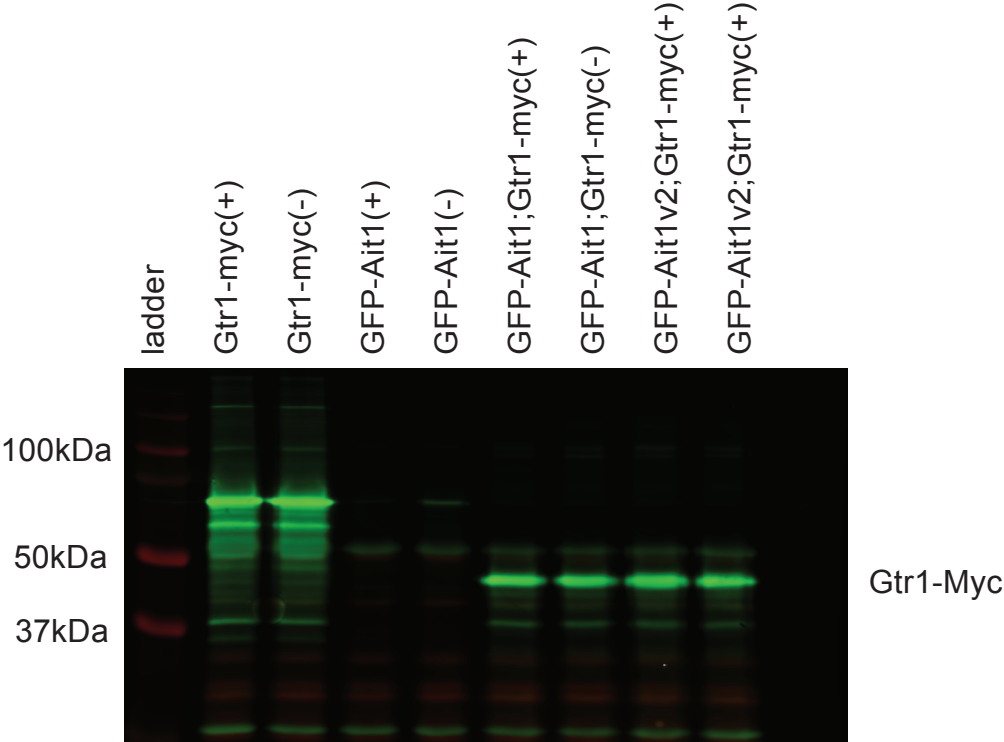

Supplement: supp [file Figure9-source data 2 label.pdf › labelled gel figures/Figure9-source data 2 label.pdf]
